# Supplementary material for: MAGMA: Generalized Gene-Set Analysis of GWAS Data
Source: PubMed Central journal article supplement (PMC4401657; doi:10.1371/journal.pcbi.1004219), 2015-04-17
Supplement: pcbi.1004219.s002.pdf [file pcbi.1004219.s002.pdf]

Supplemental figures and tables

## **MAGMA: Generalized gene-set analysis of GWAS data**

Table S1. Mean type 1 error rates for gene analysis

Table S2. Mean type 1 error rates for gene-set analysis

Table S3. Mean power for different gene analysis models in post hoc power analysis

Table S4. Power for individual genes in the second post hoc power analysis

*Table S1: Mean type 1 error rates (with SD) for gene analysis.*

| Model      | Mean type 1 error rate (SD) |
|------------|-----------------------------|
| MAGMA-main | 0.049 (.007)                |
| MAGMA-mean | 0.049 (.007)                |
| MAGMA-top  | 0.050 (.007)                |
| MAGMA-pval | 0.048 (.008)                |
| MAGMA-unwZ | 0.049 (.007)                |
| MAGMA-wtdZ | 0.049 (.008)                |

Based on 1,000 permutations of the phenotype. Error rates were computed individually for each gene in the CD data, then averaged.

*Table S2: Mean type 1 error rates (with SD) for gene-set analysis.*

| Gene-sets             | Global null model |              | Polygenic null model |              |
|-----------------------|-------------------|--------------|----------------------|--------------|
|                       | Self-contained    | Competitive  | Self-contained       | Competitive  |
| MSigDB                | 0.051 (.007)      | 0.052 (.007) | 0.088 (.028)         | 0.051 (.009) |
| Size = 10, clump = 1  | 0.050 (.007)      | 0.051 (.008) | 0.073 (.011)         | 0.051 (.009) |
| Size = 10, clump = 2  | 0.049 (.007)      | 0.050 (.008) | 0.071 (.011)         | 0.050 (.009) |
| Size = 10, clump = 5  | 0.049 (.007)      | 0.049 (.008) | 0.070 (.013)         | 0.051 (.010) |
| Size = 100, clump = 1 | 0.051 (.007)      | 0.053 (.007) | 0.131 (.015)         | 0.052 (.008) |
| Size = 100, clump = 2 | 0.050 (.007)      | 0.051 (.007) | 0.124 (.014)         | 0.051 (.008) |
| Size = 100, clump = 5 | 0.049 (.007)      | 0.049 (.007) | 0.116 (.016)         | 0.050 (.009) |

For MSigDB gene-sets as well as simulated gene-sets. Gene-sets were simulated by randomly sampling a specified number of genes from the CD data, either individually or in sets of 2 or 5 adjacent genes. Type 1 error rates were evaluated under both a global null model (no associated SNPs in the data) and a polygenic null model (1,000 associated SNPs randomly scattered across the genome, together explaining 50% of phenotypic variance). The rates shown are the mean error rates averaged over all the gene-sets, based on 1,000 simulated phenotypes.

*Table S3: Mean power for different gene analysis models in post hoc power simulations.*

| Method     | Simulation 1  |            |               |            | Simulation 2  |               |
|------------|---------------|------------|---------------|------------|---------------|---------------|
|            | $R^2 = 0.1\%$ |            | $R^2 = 0.5\%$ |            | $R^2 = 0.1\%$ | $R^2 = 0.5\%$ |
|            | Low LD        | High LD    | Low LD        | High LD    |               |               |
| MAGMA-main | 0.32 (.03)    | 0.32 (.02) | 0.97 (.01)    | 0.97 (.01) | 0.35 (.03)    | 0.98 (.00)    |
| MAGMA-mean | 0.19 (.04)    | 0.41 (.08) | 0.90 (.04)    | 0.98 (.02) | 0.19 (.12)    | 0.62 (.42)    |
| MAGMA-top  | 0.38 (.03)    | 0.41 (.02) | 0.99 (.00)    | 0.99 (.00) | 0.20 (.11)    | 0.63 (.39)    |

Values shown are mean (SD) power of 10 genes. Simulation 1 compares power to detect effects in isolated SNPs (low LD) and effects in SNPs in LD with 4 other SNPs (high LD). Simulation 2 shows power to detect obscured two-marker effect.

Table S4: Power for individual genes in the second post hoc power analysis.

|         | Correlation | $R^2 = 0.1\%$ |            |           | $R^2 = 0.5\%$ |            |           |
|---------|-------------|---------------|------------|-----------|---------------|------------|-----------|
|         |             | MAGMA-main    | MAGMA-mean | MAGMA-top | MAGMA-main    | MAGMA-mean | MAGMA-top |
| Mean    | -           | 0.348         | 0.190      | 0.205     | 0.980         | 0.619      | 0.634     |
| SD      | -           | 0.027         | 0.118      | 0.113     | 0.005         | 0.420      | 0.385     |
| Gene 1  | 0.17        | 0.33          | 0.28       | 0.27      | 0.98          | 0.96       | 0.95      |
| Gene 2  | 0.99        | 0.36          | 0.05       | 0.06      | 0.98          | 0.05       | 0.07      |
| Gene 3  | 0.21        | 0.41          | 0.33       | 0.36      | 0.99          | 0.95       | 0.96      |
| Gene 4  | 0.56        | 0.36          | 0.16       | 0.21      | 0.98          | 0.83       | 0.79      |
| Gene 5  | 0.88        | 0.35          | 0.06       | 0.09      | 0.98          | 0.13       | 0.23      |
| Gene 6  | 0.12        | 0.34          | 0.29       | 0.31      | 0.98          | 0.97       | 0.96      |
| Gene 7  | 0.99        | 0.32          | 0.05       | 0.06      | 0.98          | 0.05       | 0.08      |
| Gene 8  | 0.36        | 0.32          | 0.27       | 0.28      | 0.98          | 0.96       | 0.93      |
| Gene 9  | 0.52        | 0.35          | 0.32       | 0.27      | 0.98          | 0.96       | 0.93      |
| Gene 10 | 0.77        | 0.36          | 0.10       | 0.13      | 0.99          | 0.33       | 0.45      |

The 'correlation' column gives the correlation between the two SNPs in the gene on which the multi-marker effect was based.
