# Supplementary material for: MAGMA: Generalized Gene-Set Analysis of GWAS Data
Source: PLoS Comput Biol. 2015 Apr 17;11(4):e1004219. doi: 10.1371/journal.pcbi.1004219 (PMC4401657; doi:10.1371/journal.pcbi.1004219)
Supplement: S3 File — (XLSX) [file pcbi.1004219.s003.xlsx]

## Sheet: Gene analysis
Results from gene analysis of CD data
			MAGMA (no covariates)					MAGMA (with 10 PCs)			Other Tools
Entrez ID	Chromosome	No. of SNPs	MAGMA-main	MAGMA-mean	MAGMA-top	MAGMA-pval	MAGMA-pval-1K	MAGMA-main	MAGMA-mean	MAGMA-top	PLINK-avg	PLINK-top	PLINK-prune	VEGAS
254173	1	1	0.283	0.283	0.29	0.28	0.28	0.311	0.311	0.285	0.292	0.292	0.277	0.266
51150	1	3	0.1	0.0841	0.087	0.0819	0.0806	0.0925	0.0764	0.102	0.092	0.12	0.102	0.0857
83756	1	1	0.953	0.953	0.972		0.953	0.878	0.878	0.87	1	1	1
29101	1	3	0.236	0.107	0.11	0.0532	0.107	0.179	0.0816	0.08	0.0833	0.118	0.155	0.0493
65220	1	2	0.0907	0.052	0.142	0.0508	0.0511	0.107	0.0619	0.189	0.0547	0.135	0.0595	0.0539
2782	1	7	0.2	0.288	0.422	0.284	0.284	0.234	0.293	0.391	0.285	0.41	0.417	0.296
85452	1	1	0.91	0.91	0.913		0.91	0.871	0.871	0.863	0.912	0.912	0.914
5590	1	8	0.386	0.494	0.69	0.526	0.49	0.33	0.534	0.663	0.497	0.695	0.59	0.498
6497	1	6	0.27	0.251	0.404	0.251	0.25	0.285	0.242	0.44	0.289	0.448	0.267	0.286
79906	1	10	0.0468	0.483	0.179	0.335	0.485	0.0191	0.366	0.219	0.432	0.168	0.384	0.278
11079	1	2	0.962	0.966	0.966	0.969	0.967	0.998	0.997	0.996	0.965	0.956	0.959	0.959
9651	1	2	0.645	0.512	0.652	0.498	0.507	0.459	0.326	0.484	0.556	0.663	0.568	0.508
55229	1	4	0.577	0.254	0.292	0.259	0.26	0.532	0.221	0.264	0.237	0.34	0.457	0.266
127281	1	1	0.0277	0.0277	0.031	0.0272	0.0272	0.0431	0.0431	0.047	0.0296	0.0308	0.0266	0.0277
79258	1	4	0.732	0.827	0.84	0.841	0.826	0.607	0.729	0.696	0.854	0.828	0.808	0.822
63976	1	45	0.171	0.161	0.098	0.129	0.17	0.264	0.164	0.161	0.115	0.131	0.11	0.119
27237	1	1	0.133	0.133	0.146	0.132	0.132	0.164	0.164	0.153	0.12	0.12	0.135	0.128
1953	1	6	0.283	0.243	0.219	0.364	0.232	0.392	0.367	0.26	0.225	0.195	0.233	0.416
127262	1	1	0.771	0.771	0.764	0.77	0.77	0.73	0.73	0.715	0.769	0.769	0.785	0.766
7161	1	5	0.142	0.372	0.284	0.28	0.374	0.105	0.253	0.257	0.325	0.294	0.254	0.239
148870	1	3	0.819	0.848	0.771	0.694	0.841	0.807	0.856	0.719	0.84	0.767	0.822	0.652
57470	1	2	0.845	0.852	0.911	0.841	0.847	0.933	0.93	0.907	0.903	0.932	0.889	0.869
9731	1	13	0.0192	0.837	0.505	0.818	0.838	0.0155	0.792	0.306	0.82	0.517	0.667	0.808
1677	1	1	0.325	0.325	0.314		0.326	0.394	0.394	0.405	0.345	0.345	0.322
339448	1	1	0.635	0.635	0.639	0.64	0.64	0.616	0.616	0.608	0.626	0.626	0.638	0.645
55966	1	30	0.648	0.936	0.937	0.919	0.936	0.743	0.955	0.898	0.956	0.922	0.961	0.95
261734	1	25	0.639	0.255	0.467	0.256	0.255	0.704	0.33	0.65	0.251	0.47	0.362	0.246
8514	1	11	0.115	0.296	0.433	0.371	0.29	0.0834	0.251	0.463	0.261	0.432	0.238	0.339
26038	1	3	0.0335	0.0714	0.036	0.0364	0.0736	0.0425	0.0787	0.063	0.0671	0.0461	0.0432	0.0337
388591	1	1	0.686	0.686	0.696	0.685	0.685	0.612	0.612	0.617	0.69	0.69	0.705	0.696
23463	1	1	0.63	0.63	0.642	0.629	0.629	0.592	0.592	0.606	0.635	0.635	0.644	0.622
387509	1	1	0.168	0.168	0.17	0.171	0.171	0.158	0.158	0.154	0.17	0.17	0.177	0.141
11332	1	11	0.0114	0.0189	0.021	0.014	0.0174	0.0123	0.00754	0.013	0.022	0.0188	0.005	0.0207
54626	1	1	0.434	0.434	0.438	0.434	0.434	0.342	0.342	0.364	0.465	0.465	0.462	0.448
83715	1	1	0.0467	0.0467	0.038	0.0467	0.0467	0.0236	0.0236	0.029	0.0463	0.0481	0.0482	0.0467
57449	1	3	0.0904	0.0528	0.027	0.0659	0.0528	0.0568	0.0379	0.017	0.0432	0.0361	0.0431	0.046
79707	1	3	0.294	0.87	0.786	0.865	0.868	0.375	0.875	0.928	0.821	0.768	0.77	0.791
3104	1	1	0.135	0.135	0.141	0.133	0.133	0.127	0.127	0.134	0.134	0.134	0.15	0.145
9903	1	2	0.599	0.34	0.4	0.337	0.338	0.613	0.347	0.41	0.361	0.413	0.403	0.343
55735	1	10	0.734	0.25	0.372	0.208	0.252	0.752	0.28	0.402	0.26	0.374	0.298	0.201
23261	1	147	0.00657	0.495	0.798	0.439	0.508	0.0145	0.517	0.886	0.544	0.827	0.471	0.463
9341	1	1	0.0332	0.0332	0.033	0.0362	0.0362	0.0627	0.0627	0.07	0.034	0.036	0.0341	0.0368
8863	1	11	0.0979	0.318	0.477	0.319	0.318	0.143	0.355	0.39	0.303	0.501	0.39	0.309
10911	1	1	0.0482	0.0482	0.048	0.049	0.049	0.0389	0.0389	0.035	0.0531	0.0511	0.0484	0.0491
3604	1	4	0.786	0.669	0.72	0.666	0.666	0.855	0.777	0.774	0.686	0.732	0.748	0.673
11315	1	1	0.325	0.325	0.312	0.322	0.322	0.213	0.213	0.238	0.304	0.304	0.332	0.291
54206	1	2	0.681	0.474	0.462	0.475	0.475	0.828	0.687	0.692	0.452	0.46	0.479	0.47
50651	1	2	0.0524	0.0584	0.045	0.0238	0.058	0.0299	0.0325	0.032	0.0523	0.046	0.057	0.0236
473	1	41	0.704	0.101	0.172	0.135	0.103	0.623	0.0317	0.117	0.118	0.165	0.201	0.12
2023	1	2	0.0991	0.196	0.184	0.165	0.193	0.0908	0.15	0.13	0.197	0.193	0.175	0.169
765	1	5	0.302	0.396	0.339	0.363	0.399	0.305	0.37	0.486	0.38	0.33	0.358	0.362
155184	1	3	0.76	0.778	0.706	0.633	0.771	0.775	0.792	0.69	0.757	0.698	0.76	0.611
6518	1	5	0.713	0.325	0.361	0.319	0.319	0.866	0.632	0.647	0.303	0.369	0.34	0.334
80045	1	1	0.191	0.191	0.21	0.193	0.193	0.173	0.173	0.168	0.183	0.183	0.187	0.201
9563	1	3	0.965	0.925	0.961	0.882	0.917	0.968	0.963	0.988	0.954	0.962	0.961	0.892
80176	1	18	0.788	0.553	0.423	0.498	0.549	0.76	0.627	0.469	0.435	0.427	0.724	0.425
84275	1	2	0.493	0.567	0.451	0.876	0.566	0.461	0.535	0.401	0.52	0.469	0.546	0.87
199953	1	3	0.482	0.619	0.475	0.565	0.617	0.46	0.474	0.378	0.593	0.5	0.574	0.486
5293	1	5	0.168	0.207	0.318	0.212	0.214	0.203	0.263	0.274	0.197	0.343	0.227	0.186
56998	1	2	0.425	0.335	0.305	0.339	0.339	0.468	0.34	0.394	0.334	0.348	0.309	0.349
64802	1	2	0.894	0.743	0.819	0.753	0.736	0.778	0.573	0.732	0.781	0.821	0.808	0.797
10277	1	6	0.893	0.978	0.97	0.979	0.979	0.931	0.931	0.918	0.985	0.97	0.992	0.985
23095	1	23	0.838	0.807	0.325	0.886	0.801	0.892	0.861	0.5	0.767	0.305	0.457	0.916
100526739	1	1	0.652	0.652	0.642	0.652	0.652	0.987	0.987	0.989	0.675	0.675	0.665	0.664
5195	1	24	0.176	0.0384	0.052	0.0233	0.0361	0.181	0.0492	0.1	0.029	0.0693	0.227	0.0196
54897	1	12	0.826	0.707	0.784	0.675	0.711	0.79	0.718	0.663	0.768	0.792	0.78	0.721
148345	1	4	0.362	0.414	0.501	0.316	0.411	0.327	0.376	0.49	0.472	0.51	0.465	0.343
23435	1	2	0.145	0.152	0.178	0.151	0.151	0.0995	0.108	0.12	0.152	0.155	0.167	0.16
10747	1	2	0.11	0.0422	0.049	0.0393	0.0408	0.0863	0.0308	0.032	0.0424	0.0463	0.043	0.0396
5394	1	3	0.805	0.758	0.756	0.766	0.756	0.735	0.682	0.723	0.758	0.767	0.816	0.754
2475	1	26	0.142	0.962	0.782	0.955	0.961	0.185	0.953	0.845	0.938	0.777	0.794	0.952
10218	1	1	0.919	0.919	0.912	0.92	0.92	0.968	0.968	0.971	0.926	0.926	0.94	0.937
57540	1	2	0.57	0.682	0.66	0.667	0.682	0.688	0.772	0.678	0.664	0.651	0.686	0.675
10459	1	2	0.654	0.604	0.608	0.702	0.604	0.744	0.731	0.675	0.621	0.594	0.602	0.717
374946	1	3	0.788	0.704	0.771	0.729	0.701	0.843	0.747	0.82	0.758	0.791	0.719	0.76
57085	1	1	0.112	0.112	0.132		0.112	0.102	0.102	0.094	0.108	0.108	0.106
284498	1	2	0.25	0.122	0.145	0.125	0.126	0.253	0.111	0.166	0.141	0.18	0.162	0.103
100506310	1	2	0.335	0.199	0.191	0.202	0.202	0.314	0.137	0.128	0.194	0.196	0.208	0.18
4524	1	2	0.0203	0.0465	0.058	0.0475	0.047	0.0444	0.084	0.11	0.0467	0.0562	0.0462	0.0462
1185	1	13	0.0699	0.123	0.056	0.197	0.123	0.0987	0.184	0.077	0.113	0.0546	0.0786	0.157
4878	1	2	0.659	0.605	0.666	0.609	0.609	0.786	0.755	0.758	0.639	0.667	0.65	0.647
9927	1	3	0.567	0.38	0.367	0.493	0.38	0.269	0.243	0.22	0.348	0.374	0.458	0.409
943	1	6	0.235	0.355	0.138	0.152	0.349	0.139	0.266	0.046	0.3	0.119	0.258	0.137
7133	1	8	0.641	0.61	0.671	0.518	0.606	0.679	0.597	0.667	0.577	0.686	0.439	0.502
55187	1	12	0.877	0.794	0.891	0.778	0.786	0.868	0.635	0.815	0.799	0.893	0.89	0.818
9249	1	5	0.0205	0.0564	0.024	0.0588	0.0519	0.0215	0.0363	0.021	0.0481	0.0329	0.0222	0.0447
126767	1	6	0.0117	0.591	0.306	0.548	0.586	0.137	0.576	0.335	0.506	0.293	0.288	0.469
93190	1	3	0.294	0.327	0.357	0.329	0.328	0.46	0.504	0.609	0.313	0.351	0.394	0.323
390999	1	2	0.169	0.176	0.11	0.618	0.175	0.155	0.148	0.093	0.161	0.126	0.16	0.609
65121	1	1	0.987	0.987	0.983		0.987	0.939	0.939	0.939	1	1	1
126755	1	4	0.575	0.759	0.676	0.752	0.751	0.656	0.785	0.722	0.732	0.673	0.771	0.744
10630	1	6	0.844	0.89	0.909	0.879	0.89	0.776	0.851	0.823	0.904	0.894	0.9	0.916
7799	1	33	0.201	0.15	0.488	0.137	0.142	0.301	0.193	0.492	0.15	0.493	0.363	0.129
23254	1	111	0.074	0.621	0.126	0.655	0.604	0.072	0.625	0.131	0.589	0.103	0.655	0.657
55092	1	29	0.231	0.508	0.576	0.315	0.513	0.308	0.546	0.748	0.485	0.598	0.577	0.302
114827	1	15	0.273	0.303	0.049	0.489	0.302	0.256	0.258	0.068	0.235	0.0517	0.165	0.434
63036	1	2	0.396	0.536	0.411	0.536	0.532	0.437	0.621	0.495	0.489	0.412	0.454	0.475
51032	1	1	0.146	0.146	0.143		0.146	0.162	0.162	0.155	0.148	0.148	0.141
842	1	11	0.541	0.416	0.787	0.422	0.419	0.546	0.422	0.733	0.446	0.757	0.581	0.435
23341	1	5	0.3	0.391	0.515	0.388	0.391	0.296	0.385	0.467	0.391	0.474	0.436	0.402
79814	1	5	0.402	0.404	0.396	0.513	0.406	0.411	0.399	0.39	0.411	0.402	0.421	0.496
84301	1	6	0.144	0.401	0.278	0.48	0.399	0.0609	0.342	0.269	0.379	0.265	0.252	0.473
23207	1	9	0.235	0.261	0.262	0.253	0.256	0.151	0.193	0.269	0.213	0.254	0.248	0.233
54751	1	2	0.717	0.621	0.599	0.595	0.62	0.587	0.669	0.605	0.62	0.611	0.633	0.581
23013	1	7	0.371	0.381	0.361	0.379	0.38	0.486	0.39	0.356	0.339	0.354	0.519	0.329
7709	1	4	0.0237	0.622	0.57	0.623	0.624	0.0865	0.745	0.656	0.582	0.518	0.592	0.604
149563	1	2	0.67	0.489	0.569	0.488	0.488	0.645	0.464	0.531	0.49	0.552	0.54	0.486
27129	1	1	0.88	0.88	0.855	0.88	0.88	0.898	0.898	0.906	0.885	0.885	0.891	0.872
128272	1	3	0.688	0.65	0.534	0.573	0.645	0.663	0.681	0.449	0.635	0.522	0.533	0.577
54455	1	11	0.21	0.0704	0.131	0.0716	0.0711	0.385	0.111	0.202	0.068	0.155	0.124	0.0689
26099	1	2	0.445	0.355	0.371	0.353	0.352	0.554	0.479	0.448	0.393	0.417	0.383	0.34
374955	1	1	0.923	0.923	0.924	0.924	0.924	0.963	0.963	0.97	0.919	0.919	0.926	0.916
55707	1	2	0.138	0.229	0.12	0.23	0.227	0.146	0.24	0.116	0.204	0.141	0.173	0.166
55672	1	2	0.434	0.38	0.49			0.453	0.406	0.452	0.414	0.512	0.445
23400	1	2	0.952	0.95	0.937	0.954	0.952	0.964	0.963	0.98	0.947	0.934	0.947	0.948
6390	1	10	0.923	0.761	0.938	0.775	0.76	0.996	0.829	0.954	0.824	0.942	0.886	0.845
11240	1	23	0.347	0.626	0.279	0.698	0.62	0.318	0.718	0.376	0.535	0.286	0.15	0.607
29943	1	9	0.231	0.204	0.343	0.215	0.201	0.204	0.181	0.263	0.249	0.346	0.248	0.224
51702	1	11	0.489	0.594	0.373	0.527	0.592	0.639	0.656	0.718	0.618	0.401	0.479	0.493
23569	1	12	0.0142	0.0827	0.117	0.0474	0.0844	0.00886	0.0726	0.116	0.0885	0.137	0.101	0.0558
353238	1	9	0.675	0.793	0.513	0.762	0.791	0.745	0.742	0.548	0.762	0.511	0.695	0.703
55920	1	4	0.388	0.968	0.988	0.962	0.963	0.339	0.942	0.963	0.988	0.992	0.985	0.976
55160	1	14	0.607	0.815	0.75	0.696	0.811	0.643	0.878	0.824	0.778	0.748	0.828	0.635
81569	1	9	0.0126	0.00625	0.0018	0.0247	0.00571	0.012	0.00683	0.0017	0.007	0.0019	0.0039	0.0267
84966	1	75	0.501	0.494	0.862	0.502	0.471	0.618	0.667	0.922	0.529	0.853	0.571	0.496
127707	1	4	0.558	0.672	0.664	0.667	0.662	0.406	0.876	0.922	0.683	0.667	0.681	0.722
5081	1	12	0.633	0.518	0.334	0.444	0.511	0.559	0.534	0.283	0.492	0.336	0.493	0.458
80834	1	2	0.294	0.393	0.255	0.98	0.388	0.219	0.302	0.207	0.32	0.25	0.326	0.976
126917	1	5	0.832	0.879	0.88	0.778	0.881	0.757	0.855	0.798	0.902	0.885	0.892	0.824
23352	1	20	0.931	0.962	0.982	0.966	0.961	0.967	0.964	0.912	0.993	0.982	0.995	0.997
23065	1	6	0.652	0.891	0.89	0.908	0.894	0.657	0.785	0.89	0.938	0.916	0.908	0.929
51154	1	3	0.798	0.884	0.9	0.867	0.865	0.825	0.971	0.987	0.916	0.919	0.927	0.906
8574	1	1	0.601	0.601	0.651	0.599	0.599	0.601	0.601	0.639	0.61	0.61	0.612	0.612
54896	1	3	0.346	0.456	0.221	0.457	0.455	0.403	0.532	0.287	0.382	0.223	0.296	0.369
832	1	52	0.694	0.33	0.381	0.327	0.328	0.692	0.363	0.41	0.307	0.403	0.452	0.333
440574	1	4	0.547	0.633	0.479	0.583	0.621	0.736	0.749	0.505	0.608	0.452	0.509	0.577
100532736	1	6	0.487	0.714	0.673	0.687	0.706	0.5	0.785	0.661	0.673	0.663	0.615	0.652
4681	1	1	0.981	0.981	0.979	0.981	0.981	0.976	0.976	0.975	1	1	1	0.978
3362	1	3	0.935	0.912	0.923	0.912	0.911	0.908	0.863	0.922	0.937	0.933	0.936	0.943
255104	1	19	0.569	0.934	0.824	0.941	0.93	0.765	0.923	0.805	0.931	0.801	0.921	0.912
54546	1	1	0.746	0.746	0.738	0.747	0.747	0.721	0.721	0.71	0.773	0.773	0.771	0.777
23252	1	2	0.914	0.936	0.896	0.937	0.937	0.704	0.702	0.686	0.924	0.899	0.932	0.921
30814	1	1	0.313	0.313	0.348	0.319	0.319	0.227	0.227	0.224	0.331	0.331	0.317	0.299
5320	1	3	0.301	0.299	0.438	0.313	0.301	0.371	0.344	0.354	0.323	0.41	0.351	0.302
5322	1	7	0.00415	0.113	0.094	0.109	0.112	0.00284	0.0954	0.085	0.112	0.113	0.0709	0.114
26279	1	3	0.518	0.556	0.59	0.555	0.554	0.577	0.602	0.806	0.591	0.604	0.595	0.567
64600	1	2	0.173	0.19	0.14	0.185	0.185	0.138	0.155	0.09	0.187	0.133	0.179	0.17
391013	1	4	0.132	0.0614	0.065	0.0632	0.0585	0.115	0.0639	0.045	0.0646	0.0539	0.0684	0.0649
127733	1	1	0.845	0.845	0.844	0.845	0.845	0.883	0.883	0.876	0.854	0.854	0.859	0.85
127731	1	13	0.17	0.158	0.185	0.165	0.16	0.105	0.0993	0.131	0.127	0.179	0.2	0.133
79594	1	1	0.15	0.15	0.153		0.151	0.299	0.299	0.299	0.164	0.164	0.151
978	1	6	0.0224	0.0505	0.194	0.0522	0.0557	0.0397	0.0602	0.164	0.0501	0.168	0.0821	0.0566
65018	1	5	0.112	0.0411	0.046	0.0661	0.0421	0.121	0.0494	0.041	0.0338	0.0399	0.0624	0.0535
1650	1	5	0.214	0.0398	0.173	0.0415	0.0451	0.261	0.048	0.157	0.0394	0.156	0.0677	0.0457
57576	1	12	0.953	0.959	0.988	0.972	0.962	0.972	0.986	0.961	0.988	0.985	0.989	0.985
400745	1	1	0.843	0.843	0.821	0.844	0.844	0.991	0.991	0.988	0.846	0.846	0.835	0.86
50809	1	4	0.348	0.304	0.309	0.306	0.307	0.41	0.354	0.386	0.293	0.338	0.293	0.298
8672	1	23	0.064	0.308	0.413	0.321	0.312	0.0687	0.371	0.472	0.297	0.453	0.29	0.276
1889	1	14	0.117	0.166	0.526	0.208	0.167	0.137	0.193	0.525	0.162	0.534	0.316	0.219
84224	1	2	0.84	0.563	0.621	0.562	0.564	0.604	0.324	0.334	0.547	0.587	0.594	0.536
249	1	16	0.0816	0.0237	0.079	0.0206	0.0256	0.132	0.038	0.191	0.0276	0.0842	0.0397	0.0229
5909	1	10	0.0816	0.0112	0.02	0.0129	0.0132	0.212	0.0452	0.05	0.0156	0.0193	0.0214	0.0161
84196	1	10	0.247	0.455	0.506	0.448	0.445	0.29	0.466	0.475	0.415	0.479	0.402	0.412
401944	1	1	0.775	0.775	0.772	0.773	0.773	0.967	0.967	0.968	0.776	0.776	0.784	0.766
3339	1	8	0.115	0.305	0.371	0.302	0.302	0.23	0.401	0.385	0.285	0.416	0.233	0.246
998	1	11	0.599	0.37	0.435	0.512	0.365	0.825	0.611	0.608	0.338	0.401	0.504	0.474
54361	1	4	0.35	0.512	0.431	0.513	0.509	0.498	0.775	0.652	0.471	0.426	0.564	0.476
9923	1	12	0.999	0.975	0.999	0.975	0.972	0.997	0.968	0.996	1	1	0.996	0.992
2046	1	3	0.7	0.595	0.792	0.597	0.596	0.576	0.449	0.602	0.622	0.768	0.644	0.646
712	1	1	0.0418	0.0418	0.037	0.044	0.044	0.0296	0.0296	0.033	0.0485	0.0476	0.0455	0.0446
713	1	4	0.2	0.206	0.281	0.213	0.212	0.25	0.284	0.324	0.202	0.261	0.236	0.213
2048	1	24	0.718	0.187	0.397	0.126	0.189	0.644	0.11	0.157	0.185	0.382	0.166	0.111
646262	1	4	0.562	0.567	0.465	0.575	0.573	0.578	0.379	0.36	0.56	0.464	0.501	0.513
729059	1	2	0.704	0.768	0.849	0.768	0.77	0.605	0.705	0.585	0.817	0.854	0.792	0.827
23028	1	2	0.508	0.635	0.689	0.642	0.633	0.446	0.587	0.467	0.664	0.694	0.653	0.694
7798	1	6	0.13	0.146	0.139	0.124	0.149	0.114	0.0965	0.145	0.149	0.126	0.176	0.111
10236	1	2	0.953	0.904	0.935	0.905	0.915	0.935	0.938	0.972	0.935	0.941	0.932	0.924
80818	1	4	0.836	0.786	0.713	0.79	0.776	0.603	0.47	0.414	0.776	0.673	0.786	0.776
6920	1	10	0.214	0.59	0.538	0.572	0.574	0.287	0.755	0.747	0.541	0.577	0.48	0.547
55616	1	11	0.541	0.363	0.291	0.415	0.364	0.231	0.223	0.164	0.356	0.307	0.461	0.364
1870	1	3	0.714	0.6	0.553	0.593	0.593	0.642	0.491	0.574	0.639	0.61	0.621	0.623
6924	1	2	0.955	0.962	0.929	0.962	0.961	0.879	0.886	0.881	0.954	0.943	0.961	0.968
57095	1	1	0.55	0.55	0.544	0.549	0.549	0.485	0.485	0.477	0.554	0.554	0.539	0.561
3155	1	1	0.614	0.614	0.599	0.613	0.613	0.529	0.529	0.518	0.611	0.611	0.604	0.596
127294	1	14	0.204	0.0188	0.074	0.0195	0.0193	0.167	0.0109	0.048	0.0179	0.0822	0.0364	0.0198
58985	1	2	0.694	0.742	0.65	0.746	0.743	0.616	0.659	0.606	0.693	0.641	0.717	0.724
163702	1	4	0.305	0.272	0.289	0.275	0.274	0.218	0.148	0.26	0.291	0.298	0.245	0.285
57822	1	4	0.331	0.793	0.836	0.687	0.791	0.354	0.786	0.813	0.804	0.829	0.789	0.719
90529	1	8	0.539	0.622	0.391	0.531	0.614	0.584	0.549	0.342	0.49	0.346	0.571	0.466
57185	1	14	0.385	0.547	0.395	0.544	0.542	0.402	0.499	0.335	0.463	0.382	0.396	0.525
11123	1	4	0.739	0.482	0.458	0.433	0.482	0.606	0.254	0.363	0.475	0.458	0.39	0.456
400746	1	9	0.423	0.653	0.472	0.573	0.659	0.299	0.547	0.351	0.639	0.478	0.593	0.536
25932	1	2	0.767	0.768	0.782	0.767	0.767	0.456	0.46	0.464	0.791	0.802	0.779	0.767
864	1	7	0.127	0.356	0.306	0.356	0.356	0.13	0.374	0.344	0.282	0.29	0.481	0.295
55219	1	2	0.156	0.179	0.163	0.172	0.172	0.0558	0.123	0.099	0.17	0.155	0.167	0.169
26119	1	1	0.681	0.681	0.661	0.679	0.679	0.718	0.718	0.716	0.7	0.7	0.67	0.662
57134	1	24	0.224	0.0219	0.054	0.0234	0.0227	0.317	0.0419	0.077	0.029	0.0473	0.185	0.0238
57190	1	4	0.649	0.501	0.622	0.599	0.503	0.862	0.787	0.89	0.516	0.628	0.521	0.631
79000	1	4	0.112	0.348	0.332	0.332	0.347	0.159	0.617	0.615	0.335	0.328	0.317	0.326
3925	1	2	0.495	0.399	0.509	0.392	0.394	0.674	0.593	0.685	0.444	0.526	0.417	0.4
5051	1	7	0.327	0.504	0.37	0.458	0.494	0.601	0.605	0.556	0.471	0.38	0.37	0.426
2134	1	1	0.417	0.417	0.405	0.413	0.413	0.459	0.459	0.451	0.419	0.419	0.442	0.41
7780	1	2	0.765	0.493	0.53	0.469	0.502	0.908	0.682	0.72	0.496	0.552	0.544	0.467
84676	1	2	0.321	0.187	0.184	0.193	0.193	0.443	0.292	0.274	0.17	0.178	0.176	0.182
149420	1	2	0.22	0.187	0.161	0.189	0.189	0.405	0.325	0.389	0.171	0.16	0.17	0.183
10256	1	1	0.109	0.109	0.101	0.114	0.114	0.0927	0.0927	0.083	0.107	0.107	0.103	0.121
378807	1	3	0.687	0.392	0.431	0.397	0.399	0.653	0.345	0.453	0.379	0.452	0.479	0.386
64793	1	6	0.031	0.127	0.091	0.112	0.126	0.0831	0.208	0.189	0.108	0.0861	0.129	0.104
91544	1	4	0.0154	0.161	0.036	0.157	0.158	0.0478	0.23	0.073	0.12	0.0328	0.0575	0.118
55057	1	5	0.27	0.39	0.469	0.388	0.392	0.447	0.484	0.63	0.373	0.476	0.505	0.349
257101	1	2	0.602	0.331	0.355	0.333	0.334	0.537	0.302	0.336	0.313	0.349	0.371	0.36
79727	1	2	0.0689	0.109	0.064	0.655	0.119	0.102	0.147	0.104	0.0913	0.0674	0.101	0.656
79947	1	1	0.999	0.999	1	0.999	0.999	0.826	0.826	0.835	1	1	1	1
6195	1	3	0.452	0.391	0.359	0.189	0.393	0.508	0.329	0.319	0.366	0.37	0.443	0.183
8289	1	2	0.062	0.0931	0.048	0.0958	0.101	0.0762	0.163	0.08	0.0802	0.0476	0.077	0.0848
84243	1	2	0.136	0.0529	0.12	0.06	0.0574	0.0999	0.0375	0.067	0.0567	0.112	0.0505	0.0597
10726	1	1	0.259	0.259	0.278	0.267	0.267	0.251	0.251	0.275	0.295	0.295	0.272	0.263
646567	1	1	0.247	0.247	0.247		0.249	0.307	0.307	0.324	0.226	0.226	0.245
6548	1	5	0.0427	0.0583	0.056	0.0648	0.0624	0.0572	0.103	0.096	0.052	0.049	0.0501	0.0598
23038	1	1	0.135	0.135	0.127	0.138	0.138	0.0786	0.0786	0.08	0.146	0.146	0.138	0.14
10163	1	3	0.189	0.607	0.478	0.601	0.612	0.254	0.839	0.731	0.578	0.476	0.487	0.573
27245	1	1	0.101	0.101	0.104		0.0966	0.168	0.168	0.174	0.108	0.108	0.117
2537	1	1	0.636	0.636	0.663	0.636	0.636	0.681	0.681	0.681	0.683	0.683	0.691	0.636
199870	1	3	0.519	0.471	0.59	0.473	0.471	0.583	0.495	0.602	0.484	0.566	0.51	0.479
23673	1	1	0.894	0.894	0.902	0.895	0.895	0.847	0.847	0.84	0.924	0.924	0.926	0.897
5511	1	1	0.532	0.532	0.555	0.533	0.533	0.661	0.661	0.645	0.557	0.557	0.53	0.513
9473	1	2	0.341	0.175	0.291	0.167	0.174	0.402	0.219	0.309	0.176	0.294	0.167	0.197
6118	1	6	0.616	0.162	0.2	0.165	0.158	0.653	0.213	0.264	0.164	0.212	0.15	0.152
27293	1	3	0.728	0.748	0.804	0.752	0.745	0.816	0.907	0.931	0.771	0.812	0.836	0.783
2140	1	7	0.943	0.722	0.902	0.708	0.726	0.891	0.879	0.862	0.803	0.899	0.852	0.77
5724	1	2	0.0626	0.0543	0.031	0.0545	0.0526	0.0772	0.0603	0.039	0.0474	0.0333	0.0481	0.0485
22826	1	1	0.0121	0.0121	0.014	0.0111	0.0111	0.0152	0.0152	0.011	0.0129	0.0138	0.0115	0.0108
93974	1	1	0.0132	0.0132	0.014	0.0121	0.0121	0.0166	0.0166	0.014	0.0136	0.0145	0.0125	0.0118
83667	1	2	0.201	0.207	0.228	0.203	0.203	0.214	0.22	0.229	0.185	0.186	0.206	0.207
65979	1	3	0.871	0.728	0.731	0.739	0.726	0.857	0.737	0.753	0.716	0.744	0.721	0.762
1104	1	2	0.421	0.387	0.376	0.209	0.381	0.45	0.417	0.418	0.392	0.393	0.398	0.216
6883	1	1	0.6	0.6	0.593	0.6	0.6	0.603	0.603	0.614	0.609	0.609	0.615	0.586
51441	1	1	0.239	0.239	0.234	0.238	0.238	0.211	0.211	0.196	0.232	0.232	0.238	0.229
4985	1	7	0.682	0.561	0.644	0.475	0.562	0.63	0.618	0.573	0.563	0.604	0.621	0.453
2035	1	13	0.296	0.521	0.313	0.52	0.523	0.204	0.492	0.273	0.449	0.315	0.307	0.483
6429	1	1	0.222	0.222	0.236	0.221	0.221	0.173	0.173	0.173	0.219	0.219	0.229	0.209
51102	1	1	0.988	0.988	0.985		0.988	0.843	0.843	0.84	1	1	1
10076	1	12	0.403	0.327	0.574	0.264	0.325	0.404	0.29	0.427	0.335	0.539	0.287	0.275
4146	1	2	0.0949	0.41	0.381	0.408	0.408	0.0792	0.29	0.244	0.427	0.408	0.383	0.387
7805	1	2	0.749	0.712	0.769	0.71	0.71	0.894	0.882	0.892	0.748	0.782	0.732	0.764
9672	1	4	0.186	0.115	0.168	0.115	0.114	0.217	0.115	0.216	0.0979	0.156	0.11	0.105
9698	1	13	0.495	0.862	0.869	0.871	0.869	0.408	0.852	0.837	0.887	0.834	0.912	0.887
79570	1	11	0.864	0.652	0.791	0.595	0.645	0.835	0.63	0.743	0.667	0.81	0.783	0.586
9410	1	2	0.805	0.86	0.852	0.868	0.865	0.86	0.891	0.894	0.886	0.857	0.872	0.885
51538	1	13	0.7	0.788	0.797	0.828	0.793	0.695	0.807	0.858	0.821	0.798	0.837	0.854
2170	1	3	0.887	0.842	0.916	0.841	0.834	0.893	0.862	0.917	0.882	0.933	0.864	0.867
347735	1	2	0.972	0.815	0.858	0.811	0.814	0.96	0.784	0.821	0.839	0.88	0.864	0.828
3061	1	1	0.0865	0.0865	0.101	0.0877	0.0877	0.153	0.153	0.167	0.0837	0.0864	0.0878	0.0871
553115	1	3	0.0958	0.0871	0.063	0.0865	0.0845	0.0935	0.141	0.073	0.0805	0.0548	0.0549	0.101
1307	1	5	0.278	0.471	0.425	0.469	0.471	0.309	0.62	0.512	0.439	0.378	0.388	0.443
576	1	2	0.655	0.652	0.643	0.655	0.641	0.461	0.546	0.516	0.654	0.653	0.64	0.622
90853	1	1	0.353	0.353	0.361	0.351	0.351	0.241	0.241	0.258	0.368	0.368	0.358	0.358
56063	1	1	0.633	0.633	0.639		0.631	0.781	0.781	0.771	0.662	0.662	0.66
3932	1	1	0.711	0.711	0.725	0.71	0.71	0.594	0.594	0.594	0.734	0.734	0.699	0.716
728116	1	1	0.741	0.741	0.748	0.739	0.739	0.818	0.818	0.813	0.777	0.777	0.776	0.737
653121	1	2	0.963	0.886	0.945	0.872	0.886	0.893	0.738	0.854	0.916	0.933	0.933	0.919
5928	1	1	0.139	0.139	0.143	0.133	0.133	0.226	0.226	0.217	0.16	0.16	0.144	0.143
81493	1	2	0.376	0.168	0.169	0.159	0.158	0.51	0.254	0.257	0.169	0.182	0.176	0.144
57648	1	2	0.383	0.19	0.182	0.199	0.197	0.432	0.228	0.233	0.192	0.199	0.186	0.217
8565	1	3	0.761	0.816	0.837	0.858	0.811	0.752	0.912	0.95	0.853	0.849	0.864	0.891
64766	1	1	0.102	0.102	0.09	0.105	0.105	0.109	0.109	0.118	0.101	0.101	0.102	0.106
252995	1	1	0.0811	0.0811	0.085	0.0824	0.0824	0.0811	0.0811	0.098	0.0859	0.0856	0.0829	0.0825
3208	1	2	0.258	0.111	0.108	0.117	0.117	0.274	0.119	0.134	0.113	0.123	0.123	0.122
127544	1	1	0.151	0.151	0.147	0.162	0.162	0.119	0.119	0.117	0.166	0.166	0.164	0.178
113451	1	3	0.862	0.795	0.858	0.8	0.793	0.913	0.84	0.9	0.826	0.84	0.845	0.855
55223	1	4	0.869	0.93	0.96	0.813	0.928	0.884	0.909	0.968	0.965	0.972	0.975	0.834
149076	1	2	0.722	0.714	0.694	0.766	0.712	0.62	0.587	0.659	0.739	0.73	0.701	0.797
1912	1	7	0.0136	0.0568	0.09	0.0598	0.0588	0.0195	0.106	0.187	0.0474	0.0847	0.0543	0.0525
7579	1	3	0.757	0.651	0.666	0.639	0.644	0.503	0.601	0.597	0.656	0.662	0.635	0.633
114784	1	143	0.633	0.476	0.643	0.567	0.474	0.542	0.424	0.493	0.379	0.652	0.207	0.475
127540	1	1	0.115	0.115	0.125	0.113	0.113	0.0914	0.0914	0.091	0.101	0.101	0.125	0.113
84970	1	14	0.29	0.309	0.46	0.308	0.307	0.171	0.307	0.493	0.26	0.431	0.565	0.279
9204	1	2	0.753	0.491	0.521	0.478	0.486	0.974	0.931	0.974	0.491	0.546	0.543	0.447
6421	1	2	0.0186	0.00696	0.0064	0.00793	0.0072	0.0344	0.0116	0.012	0.0064	0.007	0.0075	0.00595
9202	1	1	0.584	0.584	0.551	0.587	0.587	0.495	0.495	0.488	0.601	0.601	0.596	0.587
79932	1	3	0.33	0.231	0.241	0.235	0.233	0.431	0.251	0.366	0.311	0.287	0.285	0.21
23154	1	1	0.696	0.696	0.676	0.698	0.698	0.664	0.664	0.643	0.721	0.721	0.723	0.721
5690	1	1	0.411	0.411	0.396	0.413	0.413	0.339	0.339	0.342	0.419	0.419	0.422	0.413
63967	1	4	0.885	0.735	0.789	0.733	0.737	0.665	0.879	0.932	0.765	0.821	0.824	0.76
192670	1	1	0.478	0.478	0.495	0.483	0.483	0.623	0.623	0.64	0.479	0.478	0.472	0.483
26523	1	3	0.746	0.802	0.793	0.8	0.804	0.811	0.923	0.956	0.815	0.812	0.794	0.804
192669	1	4	0.0477	0.621	0.522	0.649	0.629	0.0586	0.846	0.804	0.624	0.537	0.522	0.593
27285	1	1	0.56	0.56	0.564	0.558	0.558	0.582	0.582	0.566	0.593	0.593	0.56	0.559
54936	1	1	0.623	0.623	0.63		0.626	0.499	0.499	0.489	0.632	0.632	0.638
27095	1	2	0.948	0.94	0.964	0.939	0.94	0.927	0.9	0.928	0.968	0.968	0.965	0.972
55700	1	3	0.54	0.902	0.948	0.808	0.903	0.565	0.965	0.974	0.922	0.934	0.907	0.816
9967	1	4	0.246	0.0667	0.127	0.0627	0.0626	0.423	0.145	0.238	0.063	0.145	0.0931	0.0604
83931	1	5	0.107	0.0531	0.064	0.0524	0.0474	0.179	0.1	0.13	0.0514	0.0666	0.0842	0.0497
127700	1	5	0.691	0.704	0.463	0.627	0.7	0.666	0.694	0.482	0.624	0.474	0.473	0.536
1441	1	3	0.863	0.631	0.653	0.391	0.623	0.771	0.501	0.507	0.603	0.622	0.711	0.361
2899	1	44	0.0155	0.0737	0.36	0.0649	0.0772	0.0162	0.066	0.314	0.0907	0.343	0.0417	0.0858
64769	1	2	0.302	0.347	0.202	0.341	0.341	0.404	0.432	0.324	0.306	0.225	0.282	0.293
79753	1	1	0.366	0.366	0.365	0.363	0.363	0.421	0.421	0.436	0.393	0.393	0.404	0.369
7802	1	2	0.133	0.132	0.086	0.126	0.13	0.144	0.155	0.098	0.126	0.096	0.101	0.124
29889	1	2	0.557	0.376	0.514	0.361	0.373	0.626	0.445	0.603	0.382	0.528	0.434	0.355
54955	1	2	0.223	0.142	0.153	0.133	0.133	0.257	0.173	0.177	0.125	0.126	0.121	0.131
55143	1	4	0.027	0.0114	0.0044	0.0415	0.0101	0.0184	0.0137	0.0052	0.0148	0.0081	0.0115	0.0394
284656	1	5	0.256	0.482	0.252	0.373	0.482	0.234	0.476	0.189	0.385	0.21	0.304	0.306
79693	1	1	0.933	0.933	0.941	0.933	0.933	0.81	0.81	0.803	0.936	0.936	0.944	0.939
3633	1	1	0.81	0.81	0.805	0.81	0.81	0.606	0.606	0.617	0.845	0.845	0.841	0.826
10946	1	3	0.636	0.667	0.805	0.582	0.673	0.608	0.626	0.75	0.703	0.785	0.707	0.58
64121	1	1	0.809	0.809	0.793	0.806	0.806	0.785	0.785	0.775	0.846	0.846	0.832	0.776
26292	1	1	0.937	0.937	0.931	0.936	0.936	0.996	0.996	0.995	0.954	0.954	0.956	0.942
54933	1	12	0.366	0.827	0.602	0.789	0.822	0.384	0.781	0.64	0.76	0.603	0.587	0.676
79647	1	2	0.984	0.97	0.981	0.914	0.969	0.892	0.834	0.874	0.983	0.985	0.967	0.9
4725	1	1	0.818	0.818	0.812	0.817	0.817	0.631	0.631	0.637	0.835	0.835	0.834	0.804
23499	1	29	0.000969	0.162	0.151	0.137	0.163	0.00286	0.119	0.064	0.156	0.156	0.116	0.127
643314	1	1	0.312	0.312	0.298	0.314	0.314	0.204	0.204	0.194	0.356	0.356	0.326	0.329
353500	1	3	0.0992	0.119	0.132	0.282	0.121	0.063	0.0872	0.059	0.121	0.172	0.131	0.299
8761	1	3	0.331	0.198	0.244	0.2	0.2	0.274	0.141	0.19	0.188	0.216	0.265	0.18
26508	1	2	0.211	0.22	0.16	0.208	0.207	0.237	0.252	0.172	0.184	0.146	0.19	0.184
84618	1	1	0.662	0.662	0.675	0.658	0.658	0.602	0.602	0.612	0.686	0.686	0.664	0.67
51440	1	7	0.42	0.44	0.498	0.441	0.44	0.482	0.46	0.639	0.385	0.528	0.325	0.4
10450	1	3	0.364	0.316	0.265	0.537	0.314	0.651	0.679	0.627	0.281	0.266	0.365	0.45
54802	1	5	0.365	0.424	0.485	0.424	0.422	0.414	0.361	0.471	0.42	0.49	0.485	0.408
4610	1	1	0.298	0.298	0.277	0.294	0.294	0.239	0.239	0.25	0.301	0.301	0.284	0.287
84879	1	2	0.356	0.208	0.327	0.211	0.212	0.381	0.225	0.345	0.228	0.342	0.193	0.228
10487	1	10	0.055	0.285	0.214	0.284	0.284	0.0624	0.293	0.218	0.283	0.214	0.339	0.251
5538	1	5	0.278	0.0875	0.073	0.0971	0.0903	0.332	0.0993	0.083	0.0904	0.0803	0.0811	0.105
10269	1	3	0.549	0.347	0.343	0.349	0.349	0.52	0.291	0.34	0.315	0.341	0.337	0.319
1298	1	2	0.924	0.917	0.948	0.764	0.916	0.986	0.984	0.993	0.924	0.941	0.923	0.757
64744	1	10	0.176	0.447	0.26	0.448	0.449	0.229	0.491	0.381	0.428	0.259	0.541	0.417
65243	1	5	0.16	0.299	0.064	0.302	0.298	0.13	0.268	0.049	0.206	0.0588	0.148	0.209
339559	1	2	0.673	0.577	0.584	0.581	0.582	0.551	0.415	0.379	0.559	0.555	0.588	0.562
64789	1	3	0.524	0.34	0.334	0.341	0.341	0.358	0.204	0.204	0.343	0.341	0.312	0.368
127396	1	7	0.0725	0.51	0.663	0.516	0.513	0.0754	0.377	0.601	0.54	0.619	0.554	0.549
9783	1	9	0.742	0.513	0.501	0.431	0.509	0.645	0.345	0.317	0.481	0.497	0.467	0.416
4802	1	14	0.243	0.669	0.82	0.704	0.663	0.168	0.603	0.781	0.661	0.804	0.802	0.752
9132	1	10	0.653	0.931	0.715	0.877	0.934	0.712	0.958	0.837	0.911	0.735	0.909	0.86
1503	1	1	0.609	0.609	0.583	0.608	0.608	0.771	0.771	0.788	0.596	0.596	0.621	0.615
22955	1	24	0.939	0.683	0.759	0.673	0.677	0.943	0.836	0.778	0.68	0.777	0.775	0.667
100132074	1	2	0.816	0.852	0.806	0.843	0.848	0.733	0.792	0.684	0.841	0.816	0.81	0.807
1907	1	1	0.152	0.152	0.146	0.146	0.146	0.0842	0.0842	0.073	0.158	0.158	0.149	0.153
59269	1	97	0.028	0.224	0.481	0.248	0.227	0.0398	0.329	0.412	0.208	0.557	0.133	0.241
22887	1	14	0.188	0.436	0.114	0.438	0.437	0.237	0.539	0.231	0.365	0.123	0.294	0.357
284716	1	11	0.361	0.732	0.78	0.754	0.731	0.418	0.812	0.783	0.74	0.813	0.736	0.753
84217	1	7	0.118	0.358	0.439	0.36	0.356	0.377	0.321	0.433	0.326	0.43	0.334	0.317
728621	1	10	0.22	0.527	0.529	0.519	0.522	0.196	0.508	0.517	0.54	0.508	0.561	0.521
10465	1	2	0.23	0.337	0.241	0.336	0.336	0.257	0.343	0.237	0.316	0.245	0.199	0.324
4904	1	4	0.391	0.187	0.24	0.186	0.188	0.457	0.208	0.247	0.185	0.256	0.204	0.161
100129924	1	1	0.939	0.939	0.933	0.939	0.939	0.971	0.971	0.964	0.948	0.948	0.944	0.936
374969	1	3	0.646	0.52	0.526	0.523	0.513	0.563	0.483	0.479	0.495	0.534	0.464	0.501
114625	1	4	0.236	0.697	0.424	0.741	0.919	0.204	0.587	0.304	0.61	0.439	0.454	0.693
51058	1	1	0.458	0.458	0.451	0.458	0.458	0.437	0.437	0.452	0.455	0.455	0.443	0.467
6513	1	6	0.976	0.774	0.872	0.741	0.778	0.989	0.909	0.93	0.82	0.861	0.844	0.776
440585	1	5	0.981	0.782	0.912	0.802	0.788	0.949	0.911	0.974	0.841	0.904	0.895	0.824
149465	1	15	0.685	0.683	0.785	0.7	0.674	0.671	0.621	0.753	0.646	0.77	0.807	0.665
7075	1	1	0.417	0.417	0.393		0.421	0.605	0.605	0.602	0.427	0.427	0.431
991	1	1	0.926	0.926	0.924	0.926	0.926	0.909	0.909	0.887	0.919	0.919	0.938	0.935
23334	1	6	0.042	0.677	0.627	0.673	0.677	0.0369	0.544	0.467	0.709	0.663	0.645	0.673
81888	1	1	0.903	0.903	0.904		0.903	0.988	0.988	0.991	0.921	0.921	0.928
5792	1	9	0.528	0.488	0.624	0.507	0.49	0.594	0.423	0.573	0.498	0.583	0.441	0.529
9682	1	6	0.912	0.913	0.879	0.902	0.912	0.866	0.861	0.734	0.952	0.869	0.898	0.919
6487	1	36	0.742	0.959	0.964	0.939	0.953	0.724	0.911	0.942	0.988	0.965	0.984	0.956
9670	1	5	0.641	0.941	0.95	0.956	0.941	0.696	0.832	0.803	0.969	0.967	0.971	0.966
1802	1	1	0.833	0.833	0.836	0.834	0.834	0.935	0.935	0.938	0.845	0.845	0.84	0.816
533	1	1	0.618	0.618	0.625	0.616	0.616	0.762	0.762	0.765	0.615	0.615	0.63	0.639
128209	1	1	0.59	0.59	0.584	0.592	0.592	0.777	0.777	0.774	0.621	0.621	0.609	0.593
55929	1	2	0.947	0.948	0.965	0.946	0.953	0.866	0.891	0.868	0.971	0.977	0.963	0.971
79033	1	20	0.24	0.931	0.701	0.926	0.932	0.177	0.911	0.7	0.947	0.709	0.737	0.918
55182	1	38	0.197	0.116	0.047	0.124	0.115	0.251	0.142	0.089	0.108	0.042	0.146	0.132
339541	1	5	0.373	0.647	0.761	0.652	0.653	0.481	0.622	0.767	0.668	0.799	0.677	0.669
11004	1	1	0.859	0.859	0.844	0.859	0.859	0.706	0.706	0.697	0.877	0.877	0.853	0.866
8643	1	1	0.815	0.815	0.798	0.816	0.816	0.688	0.688	0.683	0.812	0.812	0.807	0.819
8891	1	21	0.854	0.649	0.834	0.674	0.642	0.888	0.724	0.878	0.616	0.831	0.804	0.649
79654	1	2	0.102	0.154	0.069	0.914	0.153	0.145	0.195	0.135	0.134	0.0746	0.11	0.91
57643	1	9	0.0371	0.0466	0.087	0.0611	0.0467	0.0392	0.0412	0.114	0.0462	0.0915	0.0322	0.0605
4595	1	2	0.707	0.624	0.724	0.616	0.623	0.582	0.488	0.585	0.664	0.738	0.649	0.645
10420	1	14	0.365	0.435	0.368	0.447	0.436	0.308	0.345	0.415	0.418	0.374	0.318	0.425
25974	1	1	0.527	0.527	0.522	0.531	0.531	0.45	0.45	0.429	0.518	0.518	0.537	0.521
5052	1	2	0.382	0.573	0.565	0.574	0.574	0.331	0.666	0.644	0.547	0.548	0.541	0.577
4678	1	5	0.931	0.585	0.668	0.599	0.589	0.946	0.593	0.719	0.618	0.7	0.745	0.575
149483	1	2	0.577	0.451	0.449	0.454	0.454	0.73	0.508	0.505	0.468	0.483	0.481	0.465
60313	1	5	0.626	0.672	0.61	0.59	0.675	0.637	0.666	0.555	0.702	0.617	0.659	0.566
23139	1	31	0.458	0.865	0.652	0.863	0.865	0.469	0.859	0.725	0.875	0.672	0.791	0.882
8503	1	4	0.916	0.814	0.782	0.775	0.817	0.914	0.806	0.799	0.819	0.803	0.793	0.783
55624	1	1	0.0384	0.0384	0.033	0.0377	0.0377	0.0517	0.0517	0.047	0.0355	0.0404	0.0382	0.0382
541468	1	1	0.0384	0.0384	0.033	0.0377	0.0377	0.0517	0.0517	0.047	0.0355	0.0404	0.0382	0.0365
8438	1	2	0.00678	0.00453	0.007	0.00554	0.00508	0.00823	0.00564	0.0112	0.0043	0.0072	0.0042	0.00485
7388	1	2	0.528	0.605	0.457	0.598	0.597	0.547	0.569	0.448	0.547	0.488	0.529	0.542
387338	1	9	0.0447	0.546	0.547	0.593	0.543	0.0564	0.658	0.379	0.57	0.563	0.456	0.606
2166	1	2	0.0321	0.0993	0.051	0.1	0.0944	0.0465	0.165	0.069	0.0857	0.0445	0.0474	0.0857
127343	1	2	0.77	0.608	0.622	0.614	0.611	0.942	0.897	0.937	0.591	0.615	0.648	0.606
148930	1	1	0.115	0.115	0.118	0.113	0.113	0.132	0.132	0.133	0.134	0.134	0.103	0.128
8569	1	5	0.0377	0.393	0.503	0.387	0.389	0.0327	0.441	0.39	0.35	0.506	0.335	0.369
64756	1	4	0.0474	0.00694	0.0084	0.00644	0.00657	0.0882	0.0161	0.018	0.0084	0.0109	0.0146	0.00524
374973	1	1	0.00426	0.00426	0.0046	0.00453	0.00453	0.0106	0.0106	0.008	0.0047	0.0036	0.0051	0.00432
9813	1	10	0.0309	0.00753	0.0078	0.00547	0.00791	0.0186	0.0212	0.027	0.0076	0.0112	0.0232	0.00581
1580	1	8	0.42	0.365	0.326	0.364	0.364	0.544	0.521	0.553	0.357	0.323	0.296	0.324
1579	1	1	0.781	0.781	0.805	0.779	0.779	0.958	0.958	0.956	0.775	0.775	0.791	0.791
260293	1	4	0.122	0.122	0.149	0.0934	0.123	0.147	0.129	0.151	0.111	0.157	0.164	0.0874
199974	1	5	0.676	0.742	0.755	0.746	0.744	0.707	0.873	0.867	0.733	0.74	0.712	0.741
284541	1	1	0.935	0.935	0.928	0.936	0.936	0.919	0.919	0.922	0.943	0.943	0.945	0.939
6886	1	4	0.697	0.823	0.601	0.775	0.818	0.669	0.82	0.674	0.779	0.613	0.7	0.757
6491	1	10	0.276	0.851	0.62	0.799	0.845	0.182	0.786	0.54	0.876	0.651	0.757	0.78
51727	1	1	0.843	0.843	0.825	0.841	0.841	0.789	0.789	0.794	0.857	0.857	0.843	0.831
388630	1	57	0.135	0.0161	0.078	0.0183	0.0202	0.195	0.0807	0.252	0.0237	0.0804	0.0161	0.0264
200010	1	2	0.592	0.512	0.511	0.518	0.508	0.521	0.434	0.428	0.501	0.505	0.528	0.532
54558	1	10	0.801	0.659	0.713	0.588	0.662	0.656	0.44	0.568	0.653	0.691	0.638	0.589
84871	1	157	0.194	0.0918	0.497	0.0873	0.0876	0.122	0.214	0.568	0.0898	0.441	0.546	0.11
79656	1	11	0.165	0.451	0.342	0.325	0.451	0.16	0.588	0.527	0.395	0.322	0.343	0.286
1996	1	11	0.177	0.0226	0.091	0.0242	0.0193	0.29	0.042	0.134	0.027	0.109	0.0618	0.0277
11124	1	20	0.0109	0.00547	0.00058	0.00387	0.0056	0.0305	0.0161	0.00166	0.0073	0.000759	0.0014	0.00472
1031	1	1	0.303	0.303	0.319	0.297	0.297	0.472	0.472	0.456	0.302	0.302	0.314	0.273
22996	1	3	0.0221	0.0354	0.008	0.039	0.0387	0.0481	0.0927	0.019	0.0271	0.0081	0.0263	0.0268
2060	1	3	0.678	0.534	0.52	0.441	0.536	0.784	0.68	0.743	0.553	0.537	0.556	0.436
4898	1	1	0.75	0.75	0.73	0.749	0.749	0.735	0.735	0.753	0.772	0.772	0.76	0.778
5865	1	9	0.21	0.0244	0.026	0.0262	0.0266	0.254	0.0287	0.028	0.0215	0.0293	0.07	0.0255
51060	1	3	0.205	0.358	0.259	0.361	0.359	0.24	0.376	0.285	0.323	0.28	0.355	0.293
9372	1	9	0.44	0.183	0.308	0.182	0.186	0.443	0.181	0.266	0.181	0.284	0.175	0.177
4998	1	1	0.0963	0.0963	0.092	0.0974	0.0974	0.0898	0.0898	0.093	0.12	0.12	0.0978	0.101
23318	1	4	0.393	0.796	0.924	0.805	0.798	0.321	0.713	0.811	0.873	0.929	0.898	0.849
2882	1	1	0.614	0.614	0.605		0.617	0.623	0.623	0.665	0.597	0.597	0.615
348378	1	4	0.797	0.854	0.775	0.851	0.852	0.658	0.775	0.53	0.839	0.77	0.866	0.853
65260	1	1	0.686	0.686	0.683	0.683	0.683	0.439	0.439	0.46	0.68	0.68	0.716	0.664
79699	1	11	0.0771	0.667	0.151	0.667	0.667	0.0997	0.65	0.272	0.59	0.146	0.28	0.606
440590	1	7	0.801	0.769	0.829	0.736	0.765	0.871	0.512	0.545	0.821	0.813	0.827	0.742
55268	1	1	0.459	0.459	0.455	0.456	0.456	0.469	0.469	0.452	0.474	0.473	0.481	0.443
6342	1	20	0.592	0.431	0.458	0.302	0.434	0.497	0.344	0.357	0.441	0.473	0.711	0.272
127435	1	6	0.552	0.634	0.345	0.518	0.635	0.635	0.532	0.262	0.553	0.371	0.537	0.427
6512	1	11	0.273	0.151	0.245	0.136	0.159	0.49	0.291	0.467	0.139	0.301	0.145	0.124
7804	1	10	0.193	0.16	0.182	0.138	0.158	0.209	0.178	0.131	0.131	0.146	0.162	0.128
63948	1	2	0.188	0.194	0.18	0.194	0.194	0.298	0.302	0.281	0.156	0.148	0.167	0.178
148979	1	40	0.105	0.73	0.836	0.758	0.719	0.0968	0.795	0.827	0.723	0.797	0.799	0.774
55706	1	6	0.404	0.863	0.907	0.87	0.856	0.548	0.814	0.899	0.91	0.894	0.933	0.906
54432	1	10	0.642	0.495	0.622	0.5	0.49	0.725	0.569	0.645	0.496	0.609	0.498	0.524
1733	1	5	0.587	0.519	0.744	0.386	0.518	0.506	0.427	0.659	0.546	0.704	0.612	0.442
51668	1	2	0.0369	0.0198	0.017	0.0191	0.0189	0.054	0.0242	0.033	0.0198	0.0239	0.0195	0.0186
115353	1	2	0.0206	0.0299	0.011	0.00642	0.0303	0.0302	0.0378	0.015	0.0237	0.0132	0.0228	0.00624
388633	1	3	0.00089	0.00875	0.00038	0.00065	0.00981	0.00135	0.0102	0.0007	0.0065	0.000475	0.000546	0.000347
9528	1	3	0.173	0.0667	0.065	0.0962	0.0664	0.166	0.0685	0.081	0.0653	0.0646	0.0675	0.0899
200008	1	7	0.0635	0.6	0.66	0.607	0.605	0.0892	0.62	0.592	0.628	0.674	0.552	0.614
606495	1	1	0.117	0.117	0.117	0.117	0.117	0.0917	0.0917	0.086	0.107	0.107	0.146	0.103
51253	1	2	0.876	0.89	0.905	0.893	0.891	0.935	0.937	0.974	0.89	0.886	0.915	0.902
23648	1	28	0.266	0.727	0.79	0.736	0.717	0.291	0.591	0.453	0.733	0.802	0.803	0.713
26027	1	13	0.000982	0.396	0.086	0.642	0.394	0.00609	0.243	0.065	0.307	0.0997	0.107	0.623
374977	1	15	0.923	0.849	0.68	0.87	0.852	0.929	0.781	0.776	0.852	0.66	0.838	0.862
7268	1	5	0.86	0.772	0.672	0.787	0.771	0.936	0.79	0.705	0.77	0.683	0.784	0.775
25973	1	3	0.855	0.982	0.982	0.982	0.981	0.945	0.922	0.927	0.982	0.977	0.983	0.98
55001	1	3	0.289	0.271	0.376	0.277	0.276	0.435	0.385	0.437	0.285	0.341	0.291	0.273
163747	1	5	0.776	0.515	0.5	0.518	0.519	0.69	0.435	0.454	0.501	0.49	0.595	0.525
1718	1	10	0.242	0.23	0.202	0.196	0.225	0.277	0.314	0.284	0.187	0.195	0.458	0.169
199964	1	3	0.877	0.936	0.933	0.943	0.937	0.926	0.891	0.948	0.96	0.944	0.957	0.967
7809	1	3	0.799	0.68	0.819	0.686	0.683	0.835	0.737	0.808	0.699	0.812	0.764	0.729
255738	1	2	0.325	0.348	0.252	0.343	0.343	0.456	0.503	0.381	0.317	0.263	0.348	0.31
23358	1	15	0.805	0.796	0.946	0.799	0.793	0.81	0.83	0.952	0.868	0.944	0.941	0.862
8613	1	21	0.925	0.686	0.725	0.699	0.69	0.887	0.685	0.616	0.669	0.727	0.725	0.683
5563	1	9	0.261	0.615	0.669	0.591	0.611	0.216	0.574	0.551	0.624	0.65	0.661	0.602
199920	1	29	0.155	0.0245	0.06	0.056	0.0192	0.214	0.0688	0.109	0.0342	0.0442	0.0394	0.0499
731	1	23	0.3	0.908	0.762	0.901	0.908	0.331	0.909	0.729	0.906	0.758	0.847	0.919
732	1	8	0.73	0.718	0.571	0.723	0.72	0.63	0.681	0.404	0.736	0.603	0.669	0.717
1600	1	315	0.0261	0.504	0.653	0.393	0.455	0.0652	0.568	0.542	0.443	0.646	0.565	0.404
115209	1	15	0.199	0.472	0.133	0.47	0.473	0.268	0.583	0.173	0.444	0.168	0.171	0.432
114803	1	13	0.0831	0.0363	0.018	0.042	0.0374	0.0822	0.0632	0.045	0.0357	0.0275	0.065	0.0413
55277	1	55	0.126	0.209	0.288	0.416	0.211	0.123	0.284	0.334	0.191	0.264	0.282	0.415
51361	1	8	0.597	0.753	0.565	0.759	0.749	0.793	0.827	0.819	0.726	0.549	0.581	0.704
1573	1	7	0.748	0.418	0.599	0.358	0.416	0.765	0.547	0.738	0.392	0.605	0.527	0.361
127795	1	16	0.556	0.373	0.618	0.34	0.333	0.679	0.602	0.731	0.347	0.61	0.631	0.328
4774	1	72	0.756	0.74	0.925	0.628	0.732	0.68	0.767	0.84	0.77	0.915	0.869	0.681
83941	1	3	0.828	0.663	0.648	0.735	0.664	0.922	0.788	0.843	0.635	0.672	0.732	0.714
10207	1	59	0.0655	0.0531	0.103	0.116	0.0541	0.22	0.144	0.103	0.0533	0.0954	0.0235	0.104
54596	1	5	0.537	0.224	0.3	0.228	0.228	0.665	0.316	0.381	0.21	0.312	0.351	0.223
163782	1	28	0.168	0.737	0.94	0.7	0.731	0.331	0.719	0.84	0.784	0.935	0.793	0.735
85440	1	10	0.0417	0.00293	0.0034	0.00276	0.00296	0.0332	0.0027	0.0021	0.0025	0.0027	0.0023	0.00206
84938	1	10	0.75	0.698	0.738	0.725	0.697	0.55	0.583	0.612	0.668	0.704	0.796	0.717
29929	1	8	0.618	0.52	0.504	0.443	0.521	0.763	0.541	0.519	0.486	0.509	0.706	0.423
23421	1	6	0.125	0.324	0.249	0.326	0.326	0.217	0.346	0.241	0.292	0.226	0.28	0.274
84455	1	5	0.14	0.0919	0.044	0.0446	0.0946	0.236	0.122	0.115	0.0815	0.0518	0.0497	0.0424
5236	1	19	0.00136	0.0176	0.00012	0.0917	0.0179	0.000381	0.0193	4e-05	0.0211	9.1e-05	0.000639	0.0912
4919	1	75	0.738	0.902	0.628	0.931	0.908	0.759	0.916	0.597	0.938	0.629	0.914	0.964
148581	1	10	0.238	0.506	0.325	0.445	0.512	0.306	0.568	0.355	0.492	0.324	0.407	0.385
57685	1	40	0.864	0.882	0.973	0.889	0.851	0.882	0.918	0.988	0.903	0.983	0.923	0.903
55225	1	8	0.2	0.161	0.05	0.293	0.168	0.213	0.193	0.086	0.143	0.0584	0.0942	0.248
3716	1	29	0.562	0.669	0.191	0.658	0.669	0.47	0.636	0.249	0.619	0.208	0.503	0.593
205	1	11	0.454	0.23	0.42	0.214	0.23	0.495	0.263	0.496	0.22	0.414	0.313	0.216
9829	1	24	0.391	0.649	0.034	0.575	0.646	0.646	0.745	0.132	0.442	0.0248	0.145	0.416
54741	1	1	0.272	0.272	0.258	0.277	0.277	0.314	0.314	0.329	0.278	0.278	0.288	0.289
3953	1	41	0.131	0.545	0.611	0.552	0.543	0.253	0.635	0.786	0.553	0.63	0.518	0.535
5142	1	121	0.00773	0.179	0.057	0.251	0.184	0.0114	0.151	0.087	0.163	0.0583	0.0691	0.242
84251	1	83	0.0414	0.0585	0.036	0.0545	0.0538	0.0382	0.0503	0.039	0.052	0.0353	0.158	0.0466
200132	1	7	0.274	0.0939	0.11	0.0938	0.0898	0.193	0.0937	0.131	0.0899	0.147	0.183	0.0863
10022	1	1	0.832	0.832	0.843	0.833	0.833	0.749	0.749	0.748	0.85	0.85	0.853	0.834
79819	1	13	0.0115	0.0044	0.031	0.00721	0.00443	0.0117	0.0047	0.035	0.0052	0.0359	0.0547	0.0099
57708	1	10	0.279	0.0478	0.133	0.0558	0.0475	0.484	0.072	0.218	0.0424	0.111	0.161	0.0497
23169	1	15	0.00113	0.0536	0.128	0.0381	0.0522	0.0026	0.0762	0.208	0.0527	0.132	0.285	0.0403
400757	1	11	4.4e-07	0.276	0.025	0.238	0.278	5.27e-07	0.285	0.017	0.171	0.0208	0.0812	0.157
149233	1	16	1.26e-19	1.21e-11	0	1.41e-12	9.33e-12	1.01e-19	1.4e-11	0	1e-06	1e-06	1e-06	0
3595	1	16	8.89e-05	0.00142	9.4e-05	0.000992	0.00121	5.91e-05	0.00122	7.2e-05	0.0017	0.000133	9.3e-05	0.00178
26135	1	3	0.03	0.097	0.133	0.097	0.0952	0.0165	0.0979	0.129	0.0864	0.117	0.0416	0.0848
55970	1	22	0.841	0.198	0.353	0.164	0.203	0.889	0.217	0.479	0.204	0.342	0.227	0.174
9077	1	1	0.307	0.307	0.291	0.306	0.306	0.38	0.38	0.386	0.33	0.33	0.332	0.308
79971	1	30	0.185	0.384	0.134	0.35	0.387	0.34	0.536	0.196	0.322	0.137	0.25	0.324
6121	1	6	0.921	0.798	0.92	0.795	0.794	0.977	0.919	0.957	0.849	0.92	0.908	0.864
55635	1	7	0.0683	0.334	0.33	0.343	0.339	0.0323	0.287	0.256	0.317	0.368	0.511	0.331
57554	1	54	0.268	0.00462	0.053	0.00718	0.00466	0.327	0.0069	0.075	0.0067	0.0557	0.0105	0.00903
55631	1	1	0.0133	0.0133	0.013	0.0136	0.0136	0.0148	0.0148	0.015	0.0118	0.0153	0.0125	0.0138
9295	1	2	0.0489	0.0672	0.023	0.0711	0.0693	0.0679	0.0808	0.032	0.048	0.0298	0.0514	0.051
1491	1	4	0.836	0.81	0.911	0.779	0.804	0.903	0.882	0.946	0.857	0.93	0.859	0.813
5733	1	49	0.882	0.566	0.467	0.668	0.569	0.92	0.669	0.501	0.5	0.459	0.546	0.626
257194	1	87	0.155	0.249	0.357	0.209	0.239	0.0805	0.258	0.411	0.232	0.345	0.275	0.245
127255	1	10	0.00751	0.227	0.15	0.221	0.224	0.0181	0.257	0.166	0.194	0.134	0.274	0.191
8790	1	2	0.343	0.365	0.28	0.362	0.361	0.368	0.399	0.273	0.35	0.285	0.325	0.354
100526835	1	39	0.203	0.758	0.77	0.735	0.759	0.208	0.742	0.68	0.791	0.745	0.662	0.759
51086	1	35	0.293	0.811	0.89	0.806	0.814	0.316	0.8	0.968	0.869	0.877	0.849	0.86
127254	1	8	0.0826	0.0606	0.125	0.0498	0.0516	0.0998	0.08	0.188	0.0578	0.117	0.187	0.0506
431707	1	2	0.441	0.348	0.53	0.346	0.347	0.469	0.389	0.46	0.373	0.533	0.406	0.394
204962	1	55	0.0333	0.393	0.238	0.404	0.389	0.0217	0.258	0.194	0.289	0.242	0.216	0.31
34	1	9	0.974	0.964	0.973	0.976	0.964	0.993	0.926	0.931	0.981	0.975	0.98	0.991
5876	1	3	0.312	0.86	0.683	0.86	0.857	0.492	0.887	0.8	0.804	0.694	0.796	0.806
4438	1	15	0.386	0.904	0.964	0.841	0.901	0.415	0.913	0.956	0.924	0.968	0.891	0.876
127247	1	1	0.642	0.642	0.632	0.641	0.641	0.536	0.536	0.532	0.656	0.656	0.664	0.637
256435	1	109	0.436	0.718	0.857	0.718	0.712	0.265	0.583	0.791	0.674	0.854	0.574	0.738
81849	1	29	1.04e-05	0.522	0.0028	0.869	0.592	0.00093	0.669	0.076	0.361	0.0043	0.145	0.924
10026	1	11	0.00262	0.474	0.073	0.399	0.48	0.00262	0.486	0.056	0.447	0.0876	0.265	0.357
26289	1	64	0.177	0.254	0.421	0.235	0.26	0.183	0.464	0.65	0.222	0.403	0.576	0.222
26009	1	3	0.772	0.51	0.561	0.366	0.51	0.742	0.471	0.571	0.502	0.543	0.575	0.363
23032	1	4	0.684	0.791	0.696	0.764	0.79	0.675	0.818	0.718	0.792	0.714	0.732	0.76
374986	1	1	0.897	0.897	0.877	0.898	0.898	0.839	0.839	0.827	0.911	0.911	0.912	0.918
91624	1	3	0.466	0.765	0.724	0.776	0.769	0.471	0.747	0.724	0.731	0.718	0.761	0.747
8880	1	2	0.796	0.898	0.896	0.898	0.9	0.944	0.852	0.87	0.912	0.907	0.911	0.904
54810	1	9	0.393	0.73	0.755	0.853	0.734	0.406	0.785	0.839	0.772	0.78	0.846	0.887
5737	1	9	0.00542	0.000467	0.00144	0.00108	0.000509	0.00497	0.000171	0.00052	0.000917	0.0014	0.0014	0.00136
10964	1	5	0.702	0.401	0.585	0.432	0.393	0.707	0.337	0.521	0.423	0.587	0.461	0.408
64123	1	15	0.0688	0.654	0.638	0.526	0.649	0.0635	0.616	0.52	0.677	0.619	0.658	0.561
23266	1	22	0.209	0.0854	0.252	0.0962	0.0838	0.347	0.0569	0.244	0.0977	0.268	0.0873	0.101
79739	1	14	0.145	0.645	0.341	0.63	0.632	0.164	0.673	0.265	0.555	0.347	0.462	0.597
5567	1	13	0.419	0.801	0.758	0.801	0.799	0.416	0.746	0.706	0.785	0.758	0.787	0.795
148418	1	5	0.0295	0.348	0.158	0.539	0.346	0.0249	0.403	0.217	0.302	0.184	0.216	0.526
58511	1	9	0.969	0.984	0.954	0.99	0.985	0.963	0.963	0.895	0.988	0.95	0.984	0.992
80135	1	2	0.593	0.538	0.594	0.534	0.534	0.413	0.364	0.4	0.551	0.595	0.566	0.565
2787	1	2	0.624	0.37	0.396	0.367	0.369	0.494	0.245	0.277	0.366	0.407	0.405	0.346
100505741	1	1	0.195	0.195	0.169	0.19	0.19	0.255	0.255	0.239	0.203	0.203	0.19	0.19
1486	1	5	0.344	0.097	0.168	0.168	0.0934	0.546	0.243	0.268	0.0911	0.147	0.248	0.162
117178	1	7	0.233	0.861	0.83	0.907	0.864	0.332	0.846	0.802	0.87	0.82	0.844	0.897
23566	1	17	0.809	0.834	0.791	0.912	0.834	0.813	0.73	0.604	0.838	0.812	0.916	0.925
255231	1	21	0.0391	0.526	0.307	0.546	0.529	0.07	0.608	0.488	0.49	0.361	0.319	0.479
55283	1	4	0.588	0.368	0.404	0.362	0.362	0.661	0.429	0.513	0.4	0.407	0.396	0.385
126820	1	14	0.737	0.682	0.71	0.675	0.671	0.903	0.801	0.772	0.675	0.76	0.725	0.637
84144	1	6	0.617	0.922	0.909	0.914	0.916	0.789	0.93	0.984	0.926	0.923	0.923	0.939
148423	1	1	0.53	0.53	0.552	0.536	0.536	0.59	0.59	0.59	0.551	0.551	0.554	0.557
8915	1	1	0.788	0.788	0.804	0.788	0.788	0.716	0.716	0.696	0.805	0.805	0.804	0.789
23576	1	49	0.398	0.836	0.834	0.834	0.836	0.475	0.853	0.91	0.843	0.809	0.797	0.853
3491	1	1	0.853	0.853	0.852		0.853	0.857	0.857	0.851	0.866	0.866	0.874
54680	1	9	0.33	0.486	0.389	0.437	0.479	0.353	0.489	0.348	0.425	0.328	0.466	0.415
255631	1	66	0.778	0.838	0.877	0.86	0.834	0.695	0.934	0.842	0.869	0.892	0.962	0.876
57489	1	5	0.827	0.609	0.654	0.612	0.611	0.827	0.507	0.643	0.625	0.605	0.616	0.628
9635	1	10	0.583	0.352	0.479	0.421	0.357	0.664	0.442	0.587	0.349	0.463	0.512	0.42
1179	1	14	0.964	0.802	0.872	0.746	0.806	0.962	0.796	0.891	0.804	0.868	0.879	0.713
22802	1	9	0.26	0.375	0.605	0.367	0.367	0.234	0.39	0.488	0.403	0.615	0.27	0.356
51100	1	2	0.241	0.33	0.252	0.33	0.33	0.201	0.288	0.214	0.332	0.265	0.32	0.292
9403	1	7	0.971	0.953	0.989	0.958	0.95	0.967	0.87	0.945	0.991	0.981	0.981	0.988
9653	1	17	0.184	0.841	0.981	0.888	0.853	0.239	0.763	0.896	0.912	0.976	0.915	0.93
5586	1	19	0.499	0.418	0.566	0.488	0.416	0.766	0.462	0.609	0.388	0.566	0.573	0.482
2959	1	2	0.278	0.27	0.309	0.273	0.273	0.259	0.243	0.364	0.278	0.295	0.303	0.282
56267	1	4	0.112	0.142	0.189	0.142	0.14	0.0573	0.0905	0.117	0.141	0.182	0.178	0.151
2635	1	3	0.862	0.613	0.671	0.619	0.612	0.643	0.358	0.379	0.62	0.65	0.672	0.638
2633	1	4	0.583	0.251	0.332	0.249	0.249	0.656	0.297	0.408	0.205	0.258	0.399	0.224
2634	1	1	0.0771	0.0771	0.089	0.077	0.077	0.0668	0.0668	0.061	0.0795	0.0777	0.081	0.0767
388646	1	5	0.149	0.119	0.13	0.117	0.117	0.102	0.0904	0.074	0.0979	0.107	0.201	0.103
115361	1	3	0.441	0.335	0.269	0.333	0.334	0.309	0.203	0.201	0.33	0.27	0.284	0.317
115362	1	2	0.0553	0.107	0.038	0.107	0.104	0.112	0.174	0.101	0.0892	0.0527	0.0901	0.0894
163351	1	6	0.6	0.448	0.519	0.449	0.45	0.594	0.384	0.418	0.44	0.473	0.586	0.447
23507	1	10	0.249	0.513	0.56	0.513	0.511	0.414	0.581	0.598	0.499	0.561	0.509	0.551
84230	1	14	0.13	0.106	0.066	0.107	0.103	0.104	0.106	0.081	0.0879	0.0666	0.147	0.101
55144	1	6	0.138	0.12	0.015	0.12	0.118	0.18	0.144	0.043	0.0813	0.0172	0.0834	0.0882
284695	1	1	0.377	0.377	0.39	0.379	0.379	0.38	0.38	0.364	0.37	0.37	0.353	0.394
84146	1	5	0.913	0.833	0.941	0.831	0.836	0.933	0.921	0.973	0.888	0.941	0.899	0.901
164045	1	7	0.713	0.636	0.792	0.587	0.631	0.576	0.616	0.738	0.666	0.781	0.701	0.58
8317	1	4	0.574	0.54	0.603	0.527	0.528	0.546	0.55	0.54	0.57	0.593	0.576	0.552
7049	1	62	0.0173	0.191	0.194	0.203	0.187	0.0258	0.205	0.295	0.139	0.21	0.283	0.131
676	1	11	0.759	0.541	0.643	0.549	0.543	0.659	0.558	0.611	0.551	0.645	0.734	0.551
253152	1	1	0.697	0.697	0.68	0.695	0.695	0.649	0.649	0.631	0.685	0.685	0.704	0.7
284697	1	6	0.538	0.326	0.374	0.445	0.327	0.569	0.445	0.5	0.316	0.403	0.439	0.42
79871	1	7	0.105	0.32	0.061	0.351	0.316	0.175	0.461	0.121	0.233	0.0645	0.0944	0.267
2672	1	2	0.0458	0.493	0.408	0.622	0.491	0.0856	0.575	0.494	0.478	0.413	0.451	0.638
7813	1	23	0.125	0.485	0.361	0.535	0.52	0.11	0.535	0.383	0.424	0.351	0.494	0.496
6125	1	2	0.406	0.328	0.431	0.327	0.327	0.453	0.38	0.437	0.346	0.44	0.379	0.358
388650	1	13	0.282	0.696	0.622	0.682	0.696	0.379	0.732	0.618	0.637	0.611	0.523	0.629
22823	1	3	0.816	0.664	0.693	0.662	0.66	0.689	0.584	0.617	0.655	0.675	0.734	0.658
343099	1	9	0.399	0.207	0.279	0.295	0.206	0.319	0.145	0.227	0.187	0.258	0.24	0.274
1810	1	2	0.125	0.0605	0.054	0.061	0.061	0.101	0.0483	0.048	0.0546	0.0516	0.0534	0.0561
54874	1	5	0.499	0.157	0.29	0.158	0.159	0.362	0.131	0.204	0.155	0.245	0.166	0.172
8412	1	52	0.929	0.561	0.288	0.513	0.564	0.937	0.762	0.322	0.534	0.304	0.517	0.508
30836	1	2	0.417	0.658	0.608	0.66	0.66	0.643	0.71	0.682	0.634	0.597	0.608	0.639
2730	1	1	0.467	0.467	0.477	0.464	0.464	0.432	0.432	0.416	0.47	0.469	0.507	0.472
24	1	39	0.00701	0.387	0.108	0.447	0.38	0.0136	0.264	0.145	0.342	0.133	0.211	0.427
9411	1	8	0.418	0.363	0.286	0.503	0.369	0.345	0.317	0.225	0.326	0.304	0.305	0.456
5825	1	3	0.000932	0.0285	0.0148	0.215	0.0259	0.00059	0.0162	0.011	0.0251	0.0153	0.0065	0.15
2152	1	2	0.593	0.416	0.443	0.414	0.415	0.531	0.321	0.372	0.425	0.459	0.451	0.416
126969	1	27	0.789	0.423	0.586	0.493	0.425	0.716	0.357	0.579	0.458	0.617	0.414	0.494
1266	1	2	0.413	0.501	0.351	0.2	0.497	0.426	0.509	0.352	0.442	0.357	0.453	0.197
199857	1	6	0.137	0.0762	0.067	0.0445	0.0782	0.25	0.203	0.156	0.0697	0.068	0.0705	0.045
148534	1	4	0.887	0.924	0.887	0.927	0.925	0.835	0.893	0.897	0.92	0.886	0.938	0.941
100527978	1	13	0.163	0.649	0.438	0.606	0.646	0.15	0.774	0.592	0.573	0.47	0.599	0.522
25950	1	1	0.205	0.205	0.191	0.206	0.206	0.334	0.334	0.315	0.223	0.223	0.213	0.205
58155	1	7	0.441	0.676	0.663	0.688	0.673	0.449	0.723	0.614	0.669	0.66	0.695	0.673
1806	1	68	0.336	0.111	0.393	0.127	0.119	0.269	0.12	0.346	0.0999	0.354	0.365	0.155
51375	1	14	0.0299	0.014	0.026	0.00275	0.0146	0.0303	0.0119	0.0122	0.012	0.031	0.0174	0.00288
163404	1	31	0.305	0.86	0.378	0.842	0.859	0.185	0.815	0.55	0.838	0.419	0.728	0.786
9890	1	10	0.335	0.749	0.723	0.818	0.746	0.215	0.747	0.783	0.799	0.775	0.73	0.857
54873	1	11	0.325	0.609	0.197	0.56	0.6	0.371	0.723	0.205	0.564	0.241	0.358	0.453
391059	1	14	0.444	0.372	0.579	0.39	0.373	0.571	0.301	0.49	0.372	0.607	0.61	0.386
178	1	15	0.809	0.943	0.924	0.96	0.948	0.65	0.94	0.887	0.966	0.925	0.947	0.974
23443	1	1	0.364	0.364	0.376	0.361	0.361	0.516	0.516	0.526	0.351	0.351	0.377	0.338
64645	1	3	0.54	0.416	0.572	0.414	0.411	0.651	0.509	0.619	0.419	0.558	0.418	0.425
163786	1	3	0.662	0.695	0.729	0.755	0.692	0.769	0.772	0.805	0.688	0.758	0.645	0.719
54482	1	1	0.31	0.31	0.329	0.308	0.308	0.505	0.505	0.52	0.311	0.311	0.337	0.301
127495	1	2	0.531	0.446	0.44	0.444	0.443	0.808	0.647	0.685	0.444	0.446	0.462	0.453
1629	1	6	0.93	0.448	0.632	0.448	0.444	0.89	0.614	0.792	0.429	0.647	0.541	0.477
8634	1	4	0.486	0.727	0.752	0.719	0.733	0.52	0.827	0.901	0.709	0.761	0.776	0.71
8556	1	12	0.927	0.607	0.632	0.54	0.602	0.933	0.526	0.62	0.626	0.623	0.597	0.545
7412	1	3	0.153	0.13	0.245	0.13	0.13	0.102	0.0961	0.164	0.143	0.312	0.137	0.139
2135	1	2	0.698	0.779	0.862	0.646	0.776	0.784	0.84	0.815	0.837	0.86	0.809	0.667
148867	1	6	0.755	0.635	0.828	0.644	0.64	0.726	0.797	0.852	0.664	0.817	0.706	0.688
51611	1	4	0.929	0.577	0.658	0.638	0.579	0.957	0.752	0.821	0.577	0.623	0.643	0.681
118427	1	44	0.544	0.96	0.859	0.96	0.958	0.744	0.957	0.919	0.959	0.84	0.946	0.967
1301	1	27	0.217	0.088	0.04	0.0975	0.08	0.122	0.0384	0.0094	0.105	0.0342	0.0266	0.0927
280	1	1	0.593	0.593	0.606	0.592	0.592	0.373	0.373	0.381	0.612	0.612	0.597	0.583
22854	1	58	0.767	0.859	0.711	0.838	0.855	0.591	0.789	0.844	0.907	0.687	0.846	0.866
10451	1	86	0.172	0.0292	0.178	0.059	0.0307	0.34	0.0708	0.388	0.0306	0.188	0.0258	0.0496
29957	1	9	0.0872	0.00835	0.015	0.00837	0.009	0.0751	0.0101	0.011	0.0148	0.013	0.0092	0.0131
284611	1	9	0.547	0.719	0.186	0.735	0.715	0.652	0.678	0.334	0.662	0.204	0.326	0.642
113802	1	1	0.752	0.752	0.742	0.749	0.749	0.603	0.603	0.621	0.797	0.797	0.759	0.769
163479	1	2	0.391	0.456	0.523	0.452	0.451	0.274	0.354	0.271	0.471	0.49	0.467	0.475
6814	1	15	0.65	0.643	0.752	0.632	0.634	0.774	0.666	0.735	0.677	0.741	0.71	0.679
254268	1	7	0.113	0.301	0.213	0.304	0.305	0.233	0.496	0.293	0.247	0.202	0.17	0.221
29899	1	5	0.0267	0.152	0.099	0.172	0.152	0.0274	0.168	0.139	0.122	0.101	0.0742	0.134
23155	1	8	0.504	0.399	0.182	0.344	0.401	0.594	0.466	0.268	0.348	0.189	0.281	0.317
22911	1	4	0.455	0.838	0.893	0.836	0.827	0.37	0.777	0.857	0.845	0.859	0.914	0.885
127003	1	1	0.598	0.598	0.572		0.593	0.741	0.741	0.76	0.632	0.632	0.6
57535	1	13	0.00236	0.241	0.452	0.242	0.246	0.00214	0.226	0.424	0.217	0.419	0.114	0.229
6301	1	2	0.338	0.228	0.275	0.234	0.233	0.361	0.256	0.261	0.207	0.233	0.225	0.226
1952	1	1	0.296	0.296	0.321	0.295	0.295	0.35	0.35	0.334	0.328	0.328	0.293	0.305
343263	1	1	0.667	0.667	0.668	0.669	0.669	0.896	0.896	0.894	0.712	0.712	0.705	0.648
6272	1	4	0.779	0.693	0.612	0.603	0.687	0.5	0.372	0.251	0.706	0.606	0.69	0.593
5686	1	5	0.935	0.942	0.949	0.939	0.94	0.871	0.762	0.874	0.955	0.956	0.937	0.945
284612	1	3	0.847	0.942	0.947	0.947	0.941	0.835	0.658	0.655	0.932	0.935	0.941	0.924
127002	1	2	0.984	0.969	0.983	0.973	0.972	0.866	0.895	0.854	0.98	0.985	0.978	0.975
83873	1	2	0.974	0.882	0.958	0.879	0.865	0.983	0.918	0.969	0.93	0.942	0.944	0.938
2773	1	2	0.675	0.848	0.826	0.842	0.84	0.563	0.84	0.811	0.865	0.848	0.822	0.838
2949	1	1	0.299	0.299	0.301		0.301	0.354	0.354	0.334	0.318	0.318	0.307
2947	1	2	0.556	0.627	0.494	0.309	0.622	0.472	0.545	0.441	0.549	0.483	0.586	0.309
79574	1	2	0.752	0.808	0.811	0.808	0.806	0.755	0.82	0.828	0.823	0.825	0.809	0.779
1435	1	5	0.123	0.138	0.099	0.139	0.141	0.16	0.208	0.133	0.144	0.0946	0.146	0.13
10768	1	2	0.0136	0.024	0.0048	0.0243	0.0241	0.0222	0.0325	0.016	0.0145	0.0072	0.0125	0.0147
85369	1	3	0.00734	0.077	0.058	0.071	0.0759	0.0163	0.102	0.079	0.0678	0.0658	0.109	0.0612
257	1	3	0.00499	0.106	0.0056	0.0266	0.104	0.0106	0.174	0.014	0.061	0.0054	0.0166	0.017
388662	1	9	0.164	0.0329	0.039	0.0315	0.028	0.16	0.0661	0.108	0.0342	0.0528	0.103	0.0321
3749	1	2	0.00387	0.00798	0.046	0.034	0.00816	0.00337	0.00716	0.055	0.0047	0.0422	0.0091	0.0336
64783	1	1	0.512	0.512	0.513	0.513	0.513	0.522	0.522	0.531	0.538	0.538	0.496	0.5
9122	1	4	0.456	0.158	0.207	0.177	0.162	0.414	0.152	0.22	0.154	0.233	0.25	0.188
10542	1	1	0.18	0.18	0.175	0.182	0.182	0.185	0.185	0.207	0.199	0.199	0.195	0.18
84432	1	2	0.987	0.911	0.962	0.907	0.908	0.915	0.863	0.897	0.947	0.961	0.96	0.916
3737	1	5	0.52	0.261	0.464	0.267	0.263	0.7	0.363	0.631	0.288	0.448	0.301	0.269
963	1	8	0.704	0.831	0.903	0.769	0.823	0.937	0.96	0.955	0.863	0.894	0.825	0.752
55791	1	1	0.638	0.638	0.668		0.64	0.85	0.85	0.842	0.628	0.628	0.655
128338	1	7	0.994	0.985	0.918	0.985	0.987	0.997	0.91	0.917	0.986	0.925	0.973	0.987
10390	1	6	0.655	0.562	0.575	0.533	0.561	0.755	0.544	0.608	0.55	0.58	0.494	0.496
79961	1	3	0.488	0.641	0.669	0.654	0.647	0.47	0.584	0.613	0.627	0.685	0.638	0.654
1117	1	6	0.963	0.905	0.982	0.912	0.906	0.975	0.915	0.984	0.969	0.984	0.985	0.96
27159	1	13	0.0207	0.069	0.105	0.0424	0.0639	0.0255	0.0856	0.122	0.0609	0.11	0.283	0.0444
128344	1	5	0.18	0.0599	0.067	0.0893	0.0531	0.148	0.0691	0.09	0.0535	0.0633	0.148	0.0678
5016	1	8	0.0205	0.0771	0.042	0.0554	0.0736	0.0345	0.0993	0.054	0.0738	0.0409	0.0662	0.0512
79084	1	2	0.0632	0.0685	0.07	0.0672	0.0672	0.0656	0.0709	0.057	0.0664	0.0614	0.0666	0.0617
128346	1	1	0.0295	0.0295	0.027	0.028	0.028	0.0326	0.0326	0.031	0.0304	0.0281	0.0306	0.0284
140	1	18	0.267	0.186	0.2	0.373	0.187	0.232	0.178	0.126	0.17	0.208	0.137	0.336
5906	1	14	0.89	0.968	0.721	0.981	0.963	0.869	0.895	0.658	0.931	0.695	0.958	0.938
55924	1	7	0.882	0.946	0.816	0.945	0.946	0.869	0.989	0.971	0.926	0.818	0.931	0.937
3752	1	54	0.606	0.905	0.74	0.902	0.888	0.624	0.829	0.744	0.907	0.736	0.933	0.92
643355	1	3	0.438	0.332	0.306	0.329	0.329	0.349	0.278	0.279	0.305	0.277	0.325	0.337
55917	1	10	0.319	0.635	0.538	0.631	0.638	0.402	0.611	0.536	0.637	0.55	0.571	0.656
7482	1	6	0.965	0.961	0.979	0.958	0.959	0.968	0.949	0.985	0.973	0.976	0.984	0.97
54879	1	7	0.629	0.6	0.466	0.586	0.604	0.685	0.604	0.561	0.614	0.527	0.514	0.575
829	1	3	0.702	0.66	0.671	0.665	0.656	0.649	0.619	0.634	0.654	0.679	0.666	0.653
4343	1	2	0.337	0.18	0.198	0.183	0.182	0.322	0.171	0.189	0.172	0.212	0.212	0.173
389	1	3	0.123	0.0721	0.072	0.0786	0.0751	0.123	0.083	0.05	0.0765	0.0859	0.0705	0.0729
6566	1	1	0.552	0.552	0.561		0.549	0.462	0.462	0.482	0.546	0.546	0.534
9860	1	3	0.617	0.639	0.522	0.638	0.638	0.67	0.665	0.666	0.622	0.547	0.566	0.645
260425	1	29	0.623	0.411	0.458	0.383	0.406	0.717	0.394	0.55	0.394	0.4	0.392	0.364
10745	1	1	0.132	0.132	0.137	0.134	0.134	0.0953	0.0953	0.094	0.133	0.133	0.137	0.15
54665	1	3	0.344	0.145	0.223	0.15	0.155	0.329	0.156	0.201	0.136	0.214	0.125	0.138
26191	1	3	0.303	0.275	0.316	0.269	0.269	0.325	0.299	0.311	0.267	0.318	0.313	0.268
10717	1	2	0.0851	0.246	0.178	0.102	0.241	0.12	0.29	0.167	0.244	0.188	0.213	0.107
204851	1	1	0.121	0.121	0.108		0.119	0.168	0.168	0.178	0.13	0.13	0.145
56944	1	1	0.261	0.261	0.256	0.26	0.26	0.44	0.44	0.447	0.251	0.251	0.286	0.27
148281	1	19	0.008	0.11	0.099	0.106	0.103	0.0142	0.196	0.063	0.113	0.0996	0.0642	0.123
51592	1	4	0.932	0.91	0.851	0.821	0.911	0.991	0.953	0.985	0.9	0.827	0.906	0.794
10286	1	1	0.706	0.706	0.708	0.708	0.708	0.635	0.635	0.645	0.703	0.703	0.716	0.712
163259	1	3	0.91	0.933	0.921	0.93	0.931	0.855	0.89	0.924	0.93	0.907	0.943	0.941
270	1	4	0.675	0.754	0.806	0.738	0.742	0.723	0.867	0.971	0.774	0.773	0.784	0.792
4893	1	1	0.541	0.541	0.535	0.542	0.542	0.66	0.66	0.684	0.556	0.556	0.56	0.527
7812	1	3	0.848	0.9	0.924	0.916	0.901	0.773	0.86	0.872	0.929	0.922	0.917	0.927
80143	1	1	0.84	0.84	0.853	0.84	0.84	0.746	0.746	0.745	0.871	0.871	0.869	0.841
6847	1	12	0.43	0.677	0.368	0.677	0.682	0.489	0.638	0.322	0.657	0.356	0.428	0.62
10100	1	23	0.26	0.93	0.868	0.928	0.92	0.256	0.897	0.872	0.938	0.891	0.933	0.936
4803	1	12	0.858	0.916	0.944	0.905	0.917	0.904	0.939	0.989	0.939	0.944	0.94	0.932
81839	1	17	0.555	0.842	0.69	0.872	0.842	0.596	0.821	0.667	0.838	0.72	0.784	0.857
845	1	15	0.299	0.802	0.62	0.778	0.806	0.332	0.832	0.731	0.807	0.622	0.749	0.782
4808	1	1	0.921	0.921	0.919	0.92	0.92	0.83	0.83	0.819	0.927	0.927	0.923	0.922
55356	1	16	0.728	0.211	0.198	0.183	0.221	0.743	0.299	0.298	0.207	0.22	0.201	0.179
126868	1	5	0.381	0.593	0.589	0.484	0.591	0.567	0.663	0.579	0.576	0.589	0.444	0.48
476	1	4	0.86	0.506	0.488	0.473	0.507	0.865	0.525	0.54	0.524	0.554	0.534	0.458
965	1	2	0.43	0.281	0.27	0.279	0.279	0.496	0.287	0.306	0.265	0.277	0.308	0.268
3321	1	3	0.883	0.68	0.816	0.677	0.685	0.748	0.465	0.566	0.711	0.804	0.78	0.711
5738	1	19	0.631	0.82	0.982	0.858	0.817	0.634	0.765	0.952	0.885	0.984	0.948	0.909
9398	1	6	0.457	0.319	0.229	0.326	0.326	0.429	0.248	0.186	0.261	0.229	0.368	0.258
8458	1	1	0.616	0.616	0.598	0.613	0.613	0.725	0.725	0.733	0.597	0.597	0.621	0.633
80263	1	2	0.289	0.275	0.272	0.54	0.27	0.32	0.344	0.22	0.288	0.267	0.283	0.54
79679	1	17	0.302	0.478	0.595	0.442	0.476	0.168	0.441	0.53	0.472	0.576	0.49	0.444
10905	1	19	0.0431	0.0131	0.105	0.0139	0.013	0.0538	0.00774	0.045	0.0153	0.0961	0.0458	0.016
54855	1	14	0.638	0.28	0.211	0.181	0.279	0.653	0.293	0.282	0.213	0.169	0.408	0.173
54834	1	5	0.208	0.578	0.329	0.813	0.57	0.167	0.637	0.443	0.529	0.356	0.437	0.786
10885	1	1	0.845	0.845	0.841	0.846	0.846	0.942	0.942	0.952	0.848	0.848	0.846	0.838
200162	1	24	0.0431	0.219	0.426	0.217	0.22	0.0328	0.1	0.295	0.21	0.442	0.414	0.221
6913	1	19	0.228	0.354	0.479	0.286	0.351	0.273	0.406	0.448	0.363	0.467	0.397	0.308
10352	1	6	0.534	0.41	0.505	0.422	0.411	0.523	0.334	0.458	0.419	0.493	0.401	0.435
51179	1	4	0.86	0.806	0.822	0.849	0.807	0.883	0.871	0.939	0.839	0.832	0.873	0.86
3284	1	3	0.845	0.645	0.655	0.645	0.65	0.858	0.787	0.816	0.63	0.652	0.659	0.639
3283	1	1	0.666	0.666	0.667	0.663	0.663	0.75	0.75	0.745	0.668	0.668	0.674	0.671
90874	1	6	0.251	0.555	0.294	0.702	0.552	0.0871	0.489	0.316	0.487	0.292	0.37	0.723
26227	1	11	0.756	0.271	0.453	0.266	0.269	0.693	0.219	0.39	0.298	0.494	0.174	0.273
3158	1	6	0.119	0.296	0.203	0.241	0.298	0.161	0.37	0.292	0.3	0.246	0.309	0.189
83998	1	4	0.183	0.122	0.063	0.109	0.134	0.242	0.132	0.097	0.141	0.0602	0.0884	0.102
11085	1	1	0.0347	0.0347	0.032	0.0342	0.0342	0.0419	0.0419	0.054	0.0317	0.0362	0.035	0.0344
4853	1	10	0.192	0.0693	0.109	0.0706	0.0735	0.288	0.0875	0.136	0.0717	0.107	0.0782	0.0726
9659	1	4	0.879	0.764	0.825	0.657	0.726	0.717	0.69	0.631	0.803	0.825	0.797	0.674
148738	1	1	0.758	0.758	0.748	0.761	0.761	0.812	0.812	0.822	0.757	0.757	0.769	0.743
128077	1	1	0.712	0.712	0.694	0.713	0.713	0.957	0.957	0.952	0.729	0.729	0.734	0.724
8515	1	1	0.175	0.175	0.165	0.176	0.176	0.239	0.239	0.254	0.162	0.162	0.187	0.183
148741	1	2	0.000169	0.0214	0.0058	0.0063	0.02	0.00017	0.0355	0.014	0.0174	0.0088	0.0093	0.00617
200035	1	1	0.998	0.998	0.995	0.998	0.998	0.722	0.722	0.731	1	1	1	0.999
10623	1	1	0.967	0.967	0.973	0.967	0.967	0.76	0.76	0.769	0.984	0.984	0.985	0.97
27246	1	7	0.133	0.0477	0.052	0.0642	0.0462	0.174	0.0717	0.067	0.0435	0.063	0.0492	0.0571
5174	1	1	0.778	0.778	0.783	0.776	0.776	0.914	0.914	0.919	0.783	0.783	0.79	0.795
5565	1	3	0.377	0.517	0.38	0.332	0.513	0.537	0.718	0.602	0.504	0.388	0.471	0.319
2330	1	10	0.462	0.322	0.402	0.311	0.325	0.829	0.345	0.564	0.309	0.396	0.302	0.284
9557	1	13	0.397	0.408	0.181	0.368	0.405	0.494	0.515	0.31	0.366	0.195	0.194	0.334
607	1	15	0.421	0.49	0.621	0.493	0.496	0.295	0.554	0.704	0.48	0.601	0.454	0.479
51205	1	6	0.859	0.755	0.556	0.884	0.755	0.94	0.85	0.689	0.707	0.541	0.68	0.919
2702	1	9	0.0374	0.0043	0.0118	0.00469	0.00522	0.0447	0.00492	0.022	0.0055	0.0104	0.0109	0.00622
2703	1	1	0.804	0.804	0.792	0.806	0.806	0.707	0.707	0.695	0.816	0.816	0.847	0.796
9900	1	2	0.255	0.28	0.215	0.29	0.29	0.459	0.507	0.384	0.234	0.187	0.233	0.253
10262	1	2	0.0516	0.025	0.026	0.0243	0.0253	0.0927	0.0439	0.04	0.0203	0.0205	0.023	0.0216
56957	1	3	0.0683	0.179	0.062	0.182	0.182	0.0923	0.203	0.098	0.162	0.0664	0.0684	0.157
11311	1	1	0.521	0.521	0.533	0.523	0.523	0.615	0.615	0.63	0.511	0.511	0.521	0.515
23632	1	1	0.629	0.629	0.618	0.63	0.63	0.677	0.677	0.696	0.622	0.622	0.625	0.634
54460	1	1	0.223	0.223	0.227	0.225	0.225	0.382	0.382	0.372	0.209	0.209	0.238	0.212
9129	1	1	0.351	0.351	0.35	0.356	0.356	0.619	0.619	0.627	0.343	0.343	0.339	0.33
23248	1	6	0.694	0.724	0.662	0.717	0.73	0.846	0.739	0.691	0.689	0.694	0.601	0.652
80222	1	1	0.9	0.9	0.899	0.899	0.899	0.912	0.912	0.909	0.933	0.933	0.921	0.899
1893	1	1	0.456	0.456	0.414	0.456	0.456	0.563	0.563	0.56	0.491	0.49	0.459	0.454
2029	1	4	0.841	0.713	0.733	0.706	0.706	0.602	0.402	0.383	0.675	0.724	0.835	0.67
55204	1	5	0.551	0.386	0.531	0.309	0.386	0.386	0.169	0.232	0.348	0.493	0.401	0.325
84072	1	2	0.312	0.317	0.341	0.321	0.321	0.156	0.162	0.16	0.303	0.304	0.316	0.317
1520	1	3	0.468	0.641	0.507	0.642	0.643	0.335	0.339	0.291	0.598	0.515	0.645	0.626
1513	1	1	0.567	0.567	0.574		0.565	0.346	0.346	0.375	0.574	0.574	0.58
405	1	3	0.215	0.213	0.22	0.211	0.211	0.142	0.113	0.226	0.202	0.203	0.154	0.196
9869	1	2	0.396	0.385	0.369	0.386	0.387	0.227	0.207	0.191	0.385	0.377	0.361	0.405
29956	1	2	0.368	0.4	0.439	0.396	0.397	0.313	0.367	0.281	0.43	0.462	0.441	0.432
55793	1	1	0.642	0.642	0.624		0.634	0.314	0.314	0.321	0.646	0.646	0.681
58497	1	2	0.88	0.832	0.838	0.824	0.825	0.935	0.901	0.927	0.855	0.849	0.84	0.852
149428	1	3	0.531	0.434	0.436	0.437	0.437	0.416	0.292	0.319	0.432	0.455	0.437	0.405
10962	1	1	0.872	0.872	0.896	0.874	0.874	0.662	0.662	0.663	0.884	0.884	0.894	0.871
126626	1	1	0.97	0.97	0.973	0.97	0.97	0.724	0.724	0.718	1	1	1	0.967
10500	1	1	0.579	0.579	0.548	0.586	0.586	0.32	0.32	0.322	0.588	0.588	0.58	0.572
8394	1	1	0.0121	0.0121	0.013		0.0116	0.00387	0.00387	0.0042	0.0125	0.0112	0.0127
8991	1	2	0.0585	0.0315	0.024	0.0158	0.0296	0.0344	0.0152	0.017	0.0327	0.0269	0.0278	0.0161
5692	1	1	0.907	0.907	0.911	0.907	0.907	0.943	0.943	0.95	0.898	0.898	0.914	0.91
23126	1	4	0.537	0.699	0.428	0.687	0.69	0.789	0.793	0.63	0.644	0.45	0.514	0.641
57530	1	5	0.162	0.235	0.184	0.23	0.23	0.216	0.263	0.199	0.25	0.208	0.193	0.223
7286	1	7	0.0138	0.0123	0.049	0.0135	0.0121	0.0318	0.0204	0.093	0.0145	0.061	0.0198	0.0154
81609	1	2	0.468	0.265	0.28	0.236	0.263	0.315	0.157	0.183	0.282	0.296	0.272	0.233
11189	1	1	0.0732	0.0732	0.074	0.072	0.072	0.0474	0.0474	0.051	0.0762	0.0795	0.08	0.0724
11022	1	4	0.0357	0.0274	0.029	0.0479	0.0303	0.0283	0.0144	0.014	0.0276	0.0284	0.0741	0.0403
6097	1	1	0.0389	0.0389	0.044	0.041	0.041	0.0145	0.0145	0.016	0.0388	0.0398	0.0381	0.0407
284486	1	1	0.0128	0.0128	0.0118	0.0129	0.0129	0.0256	0.0256	0.029	0.0136	0.0143	0.0126	0.0128
117145	1	8	0.803	0.395	0.562	0.405	0.402	0.747	0.319	0.43	0.386	0.58	0.559	0.417
6281	1	1	0.294	0.294	0.289	0.296	0.296	0.327	0.327	0.317	0.285	0.285	0.304	0.305
388698	1	2	0.687	0.702	0.633	0.695	0.698	0.767	0.704	0.738	0.665	0.626	0.631	0.665
54544	1	1	0.863	0.863	0.891	0.864	0.864	0.944	0.944	0.945	0.94	0.94	0.933	0.875
353139	1	1	0.0731	0.0731	0.062		0.0744	0.102	0.102	0.094	0.0795	0.0789	0.0772
448834	1	1	0.0175	0.0175	0.02	0.0191	0.0191	0.0169	0.0169	0.017	0.0175	0.0187	0.02	0.0184
353135	1	1	0.477	0.477	0.475	0.477	0.477	0.552	0.552	0.547	0.475	0.474	0.487	0.45
353133	1	3	0.19	0.0767	0.057	0.0801	0.0789	0.232	0.0821	0.076	0.0666	0.0799	0.111	0.0706
3713	1	2	0.83	0.83	0.833	0.828	0.828	0.9	0.9	0.917	0.829	0.829	0.826	0.825
6699	1	1	0.384	0.384	0.356		0.384	0.651	0.651	0.647	0.382	0.382	0.376
574414	1	1	0.521	0.521	0.523	0.526	0.526	0.499	0.499	0.538	0.509	0.509	0.502	0.528
114771	1	3	0.415	0.217	0.228	0.223	0.219	0.527	0.351	0.373	0.211	0.226	0.207	0.223
57115	1	11	0.315	0.323	0.388	0.351	0.32	0.407	0.47	0.612	0.32	0.409	0.206	0.347
338324	1	1	0.739	0.739	0.73			0.861	0.861	0.88	0.733	0.733	0.736
6276	1	1	0.144	0.144	0.125		0.145	0.111	0.111	0.126	0.157	0.157	0.136
26097	1	2	0.335	0.405	0.379	0.398	0.398	0.214	0.205	0.205	0.424	0.418	0.388	0.412
23557	1	1	0.414	0.414	0.418	0.407	0.407	0.203	0.203	0.221	0.445	0.445	0.416	0.438
4881	1	2	0.809	0.658	0.682	0.651	0.651	0.999	0.977	0.997	0.689	0.728	0.689	0.671
65123	1	3	0.0146	0.00584	0.016	0.00555	0.00548	0.017	0.00789	0.02	0.0074	0.0109	0.0065	0.00583
57459	1	11	0.0151	0.307	0.044	0.256	0.297	0.0137	0.312	0.038	0.255	0.0398	0.107	0.214
200186	1	1	0.321	0.321	0.311	0.314	0.314	0.363	0.363	0.371	0.305	0.305	0.339	0.298
27173	1	1	0.296	0.296	0.286	0.298	0.298	0.145	0.145	0.13	0.337	0.337	0.312	0.305
91181	1	11	0.0103	0.0696	0.0122	0.06	0.0627	0.00848	0.0779	0.0068	0.0706	0.0098	0.0078	0.0607
7170	1	1	0.206	0.206	0.192	0.202	0.202	0.27	0.27	0.284	0.21	0.21	0.225	0.187
25912	1	2	0.0207	0.0135	0.0098	0.0136	0.011	0.0309	0.0185	0.012	0.0123	0.0084	0.0104	0.0128
9898	1	6	0.0149	0.0114	0.0084	0.0103	0.00881	0.0152	0.0105	0.0034	0.0133	0.0074	0.000633	0.0117
57198	1	2	0.253	0.372	0.513	0.322	0.367	0.179	0.296	0.445	0.431	0.545	0.417	0.304
3570	1	7	0.0137	0.018	0.011	0.00375	0.0206	0.0215	0.0248	0.015	0.0142	0.0085	0.0103	0.00402
126669	1	2	0.00421	0.00108	0.0028	0.00085	0.000872	0.00337	0.000897	0.0036	0.0018	0.0043	0.0013	0.000975
126668	1	5	0.0038	0.00233	0.0028	0.00213	0.0021	0.00144	0.00222	0.0024	0.0023	0.0037	0.000819	0.00204
55585	1	2	0.00414	0.00172	0.0048	0.00183	0.00161	0.00353	0.00144	0.0038	0.0029	0.0041	0.0024	0.00176
103	1	9	0.535	0.22	0.288	0.188	0.224	0.306	0.126	0.179	0.246	0.328	0.306	0.18
3782	1	38	0.102	0.222	0.684	0.211	0.224	0.228	0.198	0.732	0.22	0.688	0.192	0.253
10654	1	1	0.787	0.787	0.775	0.788	0.788	0.809	0.809	0.798	0.821	0.821	0.811	0.769
149095	1	1	0.628	0.628	0.616	0.627	0.627	0.67	0.67	0.683	0.622	0.622	0.632	0.622
2629	1	1	0.467	0.467	0.458	0.465	0.465	0.536	0.536	0.519	0.464	0.464	0.478	0.473
57657	1	1	0.248	0.248	0.244	0.246	0.246	0.235	0.235	0.23	0.262	0.262	0.254	0.233
2224	1	1	0.303	0.303	0.316	0.302	0.302	0.316	0.316	0.327	0.306	0.306	0.324	0.32
55870	1	4	0.75	0.312	0.348	0.268	0.31	0.633	0.335	0.338	0.298	0.353	0.334	0.249
55249	1	1	0.369	0.369	0.373	0.369	0.369	0.338	0.338	0.354	0.364	0.364	0.38	0.353
7818	1	1	0.319	0.319	0.309	0.316	0.316	0.253	0.253	0.268	0.323	0.323	0.324	0.302
54856	1	1	0.351	0.351	0.353	0.349	0.349	0.292	0.292	0.298	0.366	0.366	0.345	0.343
23208	1	2	0.351	0.461	0.483	0.464	0.461	0.196	0.314	0.395	0.45	0.431	0.456	0.46
6016	1	1	0.425	0.425	0.442	0.431	0.431	0.343	0.343	0.363	0.43	0.43	0.459	0.445
22889	1	2	0.614	0.466	0.468	0.431	0.47	0.469	0.384	0.38	0.466	0.483	0.502	0.489
6746	1	2	0.423	0.493	0.37	0.206	0.497	0.282	0.339	0.232	0.435	0.362	0.424	0.198
28956	1	2	0.547	0.692	0.614	0.895	0.703	0.411	0.567	0.481	0.672	0.632	0.599	0.896
4000	1	6	0.78	0.548	0.667	0.549	0.55	0.753	0.508	0.577	0.568	0.65	0.643	0.576
64218	1	2	0.367	0.346	0.335	0.603	0.345	0.216	0.199	0.205	0.314	0.278	0.359	0.606
9673	1	4	0.00831	0.00229	0.0064	0.00249	0.00228	0.0124	0.00255	0.011	0.0019	0.005	0.005	0.00263
11243	1	2	0.0136	0.00804	0.0054	0.0068	0.00739	0.016	0.0095	0.006	0.0087	0.0055	0.0069	0.00669
100527963	1	2	0.0136	0.00804	0.0078	0.0068	0.00739	0.016	0.0095	0.0046	0.0087	0.0055	0.0069	0.00668
79957	1	1	0.588	0.588	0.583	0.587	0.587	0.549	0.549	0.536	0.59	0.59	0.624	0.563
23381	1	6	0.105	0.694	0.772	0.697	0.693	0.0976	0.698	0.813	0.736	0.773	0.707	0.729
7203	1	5	0.112	0.188	0.179	0.0708	0.19	0.0919	0.255	0.254	0.178	0.187	0.177	0.0742
128229	1	1	0.153	0.153	0.131	0.151	0.151	0.194	0.194	0.216	0.144	0.144	0.16	0.145
57127	1	3	0.156	0.0739	0.084	0.0757	0.0768	0.181	0.0892	0.102	0.0801	0.0967	0.0773	0.0807
10485	1	2	0.324	0.333	0.286	0.327	0.327	0.334	0.322	0.31	0.32	0.282	0.323	0.292
4209	1	4	0.505	0.181	0.243	0.209	0.183	0.548	0.192	0.202	0.179	0.244	0.23	0.202
128239	1	6	0.344	0.0386	0.076	0.0416	0.0346	0.177	0.0148	0.031	0.04	0.0795	0.0577	0.0466
164118	1	2	0.577	0.776	0.724	0.761	0.773	0.501	0.769	0.691	0.727	0.696	0.747	0.722
128240	1	2	0.963	0.867	0.896	0.869	0.862	0.986	0.897	0.949	0.884	0.911	0.918	0.843
54865	1	4	0.0902	0.714	0.531	0.698	0.709	0.0619	0.647	0.317	0.676	0.524	0.533	0.665
63827	1	2	0.0906	0.113	0.067	0.114	0.116	0.0396	0.0537	0.021	0.0873	0.0527	0.102	0.0894
10763	1	1	0.163	0.163	0.15	0.165	0.165	0.127	0.127	0.134	0.149	0.149	0.163	0.15
81875	1	1	0.0942	0.0942	0.094	0.0917	0.0917	0.0814	0.0814	0.084	0.116	0.116	0.101	0.0908
5546	1	3	0.349	0.482	0.207	0.282	0.495	0.317	0.428	0.19	0.381	0.21	0.363	0.228
9047	1	1	0.221	0.221	0.245	0.221	0.221	0.216	0.216	0.205	0.212	0.212	0.223	0.213
4914	1	4	0.397	0.409	0.465	0.412	0.412	0.544	0.565	0.531	0.421	0.478	0.384	0.407
3645	1	1	0.868	0.868	0.879	0.87	0.87	0.948	0.948	0.958	0.879	0.879	0.87	0.855
375033	1	2	0.0801	0.0757	0.078	0.0747	0.074	0.0861	0.0763	0.103	0.0718	0.0788	0.0778	0.0736
149499	1	1	0.078	0.078	0.076	0.0767	0.0767	0.182	0.182	0.169	0.0857	0.0762	0.0804	0.0782
9826	1	14	0.46	0.0836	0.166	0.0724	0.0813	0.61	0.105	0.166	0.0926	0.18	0.091	0.0795
440695	1	3	0.434	0.367	0.327	0.365	0.365	0.602	0.695	0.556	0.389	0.362	0.371	0.343
2117	1	2	0.914	0.925	0.967	0.881	0.926	0.687	0.807	0.866	0.963	0.979	0.973	0.882
83416	1	9	0.567	0.389	0.588	0.399	0.383	0.641	0.356	0.58	0.337	0.579	0.621	0.387
83417	1	3	0.329	0.0743	0.108	0.0672	0.0721	0.466	0.133	0.171	0.0717	0.11	0.0991	0.068
115352	1	1	0.986	0.986	0.992	0.986	0.986	0.892	0.892	0.888	1	1	1	0.986
79368	1	2	0.612	0.617	0.534	0.611	0.616	0.707	0.661	0.633	0.56	0.509	0.592	0.576
115350	1	10	0.787	0.664	0.576	0.626	0.66	0.773	0.67	0.7	0.588	0.537	0.559	0.588
922	1	2	0.898	0.889	0.864	0.883	0.887	0.982	0.987	0.974	0.883	0.866	0.876	0.894
55243	1	28	0.918	0.398	0.432	0.521	0.399	0.851	0.248	0.328	0.376	0.423	0.515	0.477
912	1	3	0.0282	0.677	0.645	0.664	0.662	0.0507	0.774	0.82	0.694	0.64	0.62	0.635
913	1	1	0.877	0.877	0.885	0.877	0.877	0.826	0.826	0.83	0.89	0.89	0.896	0.879
128360	1	1	0.804	0.804	0.81	0.804	0.804	0.613	0.613	0.599	0.819	0.819	0.82	0.804
343406	1	3	0.857	0.857	0.814	0.868	0.86	0.813	0.669	0.629	0.886	0.853	0.86	0.898
391112	1	1	0.602	0.602	0.6	0.598	0.598	0.679	0.679	0.683	0.652	0.652	0.612	0.563
128366	1	1	0.409	0.409	0.427	0.408	0.408	0.252	0.252	0.266	0.443	0.443	0.416	0.374
6708	1	12	0.0427	0.283	0.219	0.293	0.278	0.0792	0.312	0.128	0.239	0.206	0.235	0.256
128372	1	1	0.785	0.785	0.797	0.785	0.785	0.708	0.708	0.701	0.792	0.792	0.799	0.798
81442	1	1	0.117	0.117	0.101	0.116	0.116	0.0856	0.0856	0.086	0.119	0.119	0.13	0.122
4332	1	2	0.289	0.833	0.761	0.704	0.827	0.314	0.729	0.665	0.807	0.775	0.774	0.724
149628	1	4	0.789	0.749	0.74	0.754	0.743	0.579	0.673	0.482	0.738	0.713	0.736	0.731
3428	1	6	0.579	0.946	0.977	0.941	0.944	0.548	0.919	0.787	0.971	0.975	0.988	0.964
57863	1	4	0.0214	0.112	0.02	0.115	0.118	0.0204	0.112	0.013	0.0877	0.0167	0.0397	0.0858
2532	1	1	0.515	0.515	0.532	0.513	0.513	0.73	0.73	0.738	0.513	0.513	0.527	0.5
2205	1	4	0.548	0.336	0.299	0.513	0.335	0.423	0.257	0.163	0.35	0.305	0.281	0.526
26476	1	1	0.704	0.704	0.715	0.701	0.701	0.646	0.646	0.674	0.765	0.765	0.741	0.707
325	1	1	0.707	0.707	0.706	0.705	0.705	0.725	0.725	0.716	0.719	0.719	0.71	0.702
343413	1	2	0.936	0.893	0.897	0.894	0.893	0.844	0.813	0.795	0.907	0.903	0.936	0.901
56833	1	1	0.218	0.218	0.221	0.217	0.217	0.237	0.237	0.224	0.217	0.217	0.232	0.206
284677	1	2	0.45	0.447	0.359	0.446	0.444	0.448	0.522	0.395	0.409	0.364	0.404	0.425
25790	1	4	0.66	0.73	0.556	0.731	0.727	0.625	0.715	0.49	0.675	0.523	0.596	0.692
8407	1	2	0.206	0.61	0.476	0.621	0.614	0.294	0.59	0.469	0.546	0.467	0.49	0.579
57549	1	1	0.328	0.328	0.331	0.334	0.334	0.245	0.245	0.25	0.342	0.342	0.346	0.334
89886	1	2	0.209	0.288	0.261	0.286	0.286	0.329	0.418	0.372	0.286	0.269	0.269	0.284
3766	1	2	0.576	0.526	0.624	0.529	0.531	0.745	0.704	0.745	0.569	0.613	0.536	0.539
93185	1	2	0.774	0.628	0.75	0.631	0.632	0.762	0.621	0.692	0.681	0.743	0.655	0.674
477	1	2	0.98	0.98	0.986	0.978	0.979	0.965	0.946	0.96	0.981	0.985	0.986	0.989
480	1	9	0.65	0.45	0.539	0.542	0.435	0.801	0.605	0.7	0.403	0.478	0.424	0.504
844	1	2	0.609	0.653	0.645	0.668	0.662	0.635	0.687	0.647	0.683	0.678	0.684	0.677
50717	1	3	0.919	0.878	0.883	0.906	0.874	0.963	0.944	0.938	0.876	0.866	0.878	0.897
5824	1	1	0.611	0.611	0.602	0.61	0.61	0.572	0.572	0.573	0.622	0.622	0.636	0.606
1314	1	3	0.255	0.231	0.106	0.223	0.223	0.282	0.251	0.126	0.208	0.121	0.211	0.182
23385	1	4	0.673	0.677	0.823	0.664	0.671	0.718	0.712	0.85	0.717	0.858	0.695	0.681
57216	1	5	0.902	0.845	0.846	0.834	0.841	0.741	0.703	0.692	0.844	0.858	0.878	0.831
114836	1	7	0.967	0.958	0.898	0.937	0.955	0.965	0.961	0.867	0.96	0.888	0.953	0.93
8832	1	8	0.547	0.647	0.718	0.652	0.65	0.604	0.656	0.671	0.674	0.705	0.628	0.665
6504	1	13	0.0404	0.403	0.45	0.4	0.403	0.0717	0.477	0.559	0.336	0.451	0.207	0.337
962	1	7	0.0395	0.000635	0.009	0.0396	0.000702	0.0407	0.00131	0.022	0.0016	0.0104	0.0021	0.0435
57823	1	3	0.569	0.872	0.859	0.836	0.872	0.655	0.85	0.888	0.907	0.86	0.87	0.84
4063	1	6	0.951	0.763	0.732	0.744	0.759	0.919	0.701	0.618	0.725	0.717	0.795	0.747
51744	1	2	0.338	0.367	0.298	0.37	0.372	0.42	0.386	0.344	0.339	0.273	0.324	0.315
50848	1	3	0.189	0.848	0.76	0.91	0.844	0.235	0.916	0.905	0.82	0.756	0.754	0.911
7391	1	1	0.945	0.945	0.938	0.945	0.945	0.866	0.866	0.867	0.956	0.956	0.952	0.939
257106	1	2	0.724	0.768	0.709	0.451	0.771	0.532	0.575	0.577	0.725	0.671	0.744	0.422
81607	1	3	0.188	0.215	0.389	0.386	0.22	0.208	0.284	0.39	0.219	0.363	0.226	0.357
5202	1	2	0.99	0.894	0.908	0.892	0.893	0.982	0.865	0.886	0.911	0.923	0.926	0.892
4817	1	1	0.494	0.494	0.496	0.497	0.497	0.414	0.414	0.421	0.524	0.524	0.542	0.513
9191	1	1	0.494	0.494	0.496	0.497	0.497	0.414	0.414	0.421	0.524	0.524	0.542	0.508
8703	1	1	0.521	0.521	0.525	0.526	0.526	0.473	0.473	0.469	0.548	0.548	0.557	0.533
4720	1	4	0.602	0.424	0.405	0.421	0.419	0.678	0.518	0.545	0.335	0.352	0.515	0.393
2207	1	1	0.464	0.464	0.478	0.462	0.462	0.564	0.564	0.543	0.472	0.471	0.49	0.422
336	1	1	0.412	0.412	0.415	0.406	0.406	0.437	0.437	0.458	0.419	0.419	0.399	0.433
9970	1	2	0.931	0.934	0.903	0.705	0.933	0.931	0.928	0.917	0.937	0.934	0.93	0.699
654790	1	4	0.172	0.325	0.07	0.333	0.333	0.141	0.353	0.077	0.205	0.0681	0.207	0.207
6391	1	1	0.744	0.744	0.753	0.74	0.74	0.611	0.611	0.623	0.754	0.754	0.748	0.715
257177	1	2	0.431	0.489	0.394	0.5	0.495	0.433	0.409	0.36	0.43	0.387	0.475	0.462
2212	1	1	0.315	0.315	0.273	0.317	0.317	0.236	0.236	0.236	0.315	0.315	0.312	0.328
84824	1	3	0.955	0.953	0.95	0.944	0.95	0.971	0.916	0.938	0.961	0.948	0.958	0.964
127943	1	2	0.486	0.551	0.514	0.554	0.553	0.519	0.568	0.675	0.541	0.509	0.561	0.571
22926	1	43	0.831	0.875	0.931	0.894	0.867	0.857	0.695	0.819	0.899	0.94	0.985	0.928
25903	1	13	0.192	0.648	0.383	0.642	0.645	0.209	0.726	0.482	0.684	0.397	0.572	0.685
9722	1	92	0.202	0.92	0.942	0.927	0.914	0.256	0.918	0.977	0.965	0.948	0.902	0.942
284680	1	2	0.881	0.897	0.881	0.899	0.9	0.86	0.871	0.875	0.906	0.888	0.903	0.904
400793	1	5	0.433	0.264	0.453	0.23	0.269	0.434	0.233	0.41	0.297	0.485	0.392	0.219
117157	1	3	0.715	0.454	0.624	0.502	0.457	0.662	0.402	0.555	0.456	0.633	0.475	0.518
127933	1	2	0.566	0.351	0.39	0.353	0.352	0.553	0.339	0.348	0.363	0.379	0.333	0.341
6675	1	3	0.744	0.738	0.585	0.575	0.73	0.713	0.696	0.523	0.675	0.564	0.679	0.552
4921	1	36	0.716	0.0345	0.03	0.0352	0.0379	0.681	0.0624	0.06	0.0327	0.0307	0.258	0.0329
339512	1	8	0.758	0.83	0.661	0.674	0.828	0.824	0.845	0.82	0.81	0.662	0.842	0.608
8490	1	41	0.121	0.164	0.377	0.199	0.167	0.122	0.0982	0.27	0.177	0.397	0.154	0.193
83540	1	13	0.123	0.0162	0.033	0.0216	0.0169	0.0806	0.0115	0.015	0.0185	0.0263	0.0133	0.0243
5087	1	56	0.357	0.14	0.064	0.13	0.143	0.346	0.12	0.029	0.143	0.0539	0.143	0.141
4009	1	37	0.088	0.112	0.034	0.101	0.118	0.317	0.243	0.06	0.101	0.0431	0.0951	0.0794
6258	1	20	0.0597	0.36	0.427	0.341	0.368	0.0586	0.495	0.474	0.345	0.396	0.215	0.332
440699	1	6	0.859	0.954	0.98	0.944	0.96	0.712	0.946	0.955	0.978	0.973	0.971	0.968
4259	1	7	0.418	0.345	0.334	0.778	0.348	0.399	0.311	0.244	0.324	0.36	0.226	0.814
223	1	8	0.328	0.452	0.393	0.343	0.449	0.312	0.177	0.131	0.449	0.359	0.458	0.314
54499	1	8	0.476	0.192	0.23	0.195	0.191	0.326	0.151	0.181	0.152	0.229	0.315	0.18
7371	1	20	0.488	0.112	0.313	0.146	0.11	0.547	0.0997	0.263	0.128	0.296	0.178	0.131
149297	1	22	0.0635	0.0561	0.158	0.0429	0.0551	0.118	0.044	0.215	0.0639	0.16	0.0342	0.0512
57645	1	1	0.011	0.011	0.0086	0.011	0.011	0.0102	0.0102	0.011	0.0104	0.0115	0.0111	0.0112
117143	1	5	0.916	0.678	0.703	0.673	0.677	0.87	0.958	0.985	0.663	0.696	0.74	0.659
387597	1	5	0.203	0.0256	0.064	0.0258	0.0244	0.193	0.0255	0.044	0.0278	0.0811	0.0444	0.0271
84944	1	2	0.587	0.585	0.669	0.585	0.586	0.74	0.733	0.821	0.601	0.642	0.624	0.588
10223	1	6	0.811	0.734	0.731	0.734	0.74	0.749	0.76	0.8	0.745	0.74	0.804	0.732
92235	1	9	0.333	0.195	0.283	0.165	0.203	0.349	0.264	0.404	0.171	0.311	0.287	0.148
5451	1	22	0.118	0.0694	0.0021	0.074	0.0689	0.109	0.0583	0.0046	0.0533	0.0023	0.0194	0.06
919	1	21	0.0101	0.173	0.077	0.152	0.176	0.0056	0.0783	0.023	0.149	0.0809	0.0553	0.133
8804	1	5	0.913	0.726	0.731	0.711	0.715	0.875	0.829	0.73	0.753	0.732	0.775	0.77
92241	1	12	0.204	0.422	0.506	0.358	0.419	0.171	0.309	0.332	0.394	0.529	0.277	0.333
9019	1	13	0.373	0.583	0.276	0.545	0.588	0.581	0.526	0.244	0.589	0.309	0.612	0.552
55811	1	12	0.344	0.597	0.673	0.566	0.596	0.364	0.536	0.784	0.605	0.667	0.549	0.55
25874	1	1	0.288	0.288	0.292	0.292	0.292	0.152	0.152	0.146	0.273	0.273	0.272	0.295
55827	1	6	0.879	0.715	0.666	0.72	0.715	0.698	0.58	0.446	0.728	0.666	0.718	0.731
23432	1	5	0.93	0.705	0.809	0.712	0.702	0.787	0.478	0.626	0.711	0.772	0.754	0.744
261726	1	5	0.453	0.73	0.819	0.738	0.73	0.355	0.851	0.908	0.743	0.801	0.872	0.763
375035	1	1	0.549	0.549	0.538	0.549	0.549	0.696	0.696	0.71	0.521	0.521	0.59	0.539
9095	1	7	0.295	0.503	0.207	0.565	0.51	0.34	0.589	0.257	0.443	0.185	0.313	0.487
1805	1	17	0.0852	0.547	0.424	0.465	0.544	0.0783	0.694	0.755	0.501	0.404	0.536	0.454
481	1	13	0.00787	0.299	0.073	0.354	0.305	0.00995	0.328	0.118	0.25	0.0701	0.0722	0.306
29922	1	50	0.387	0.61	0.446	0.629	0.608	0.64	0.641	0.463	0.562	0.427	0.445	0.593
8548	1	6	0.373	0.182	0.216	0.271	0.173	0.392	0.158	0.195	0.169	0.201	0.29	0.283
57821	1	6	0.28	0.32	0.236	0.309	0.307	0.317	0.257	0.221	0.302	0.208	0.344	0.287
10560	1	2	0.301	0.497	0.363	0.509	0.497	0.227	0.433	0.313	0.434	0.359	0.427	0.447
2153	1	26	0.476	0.23	0.596	0.224	0.224	0.345	0.138	0.234	0.235	0.558	0.192	0.233
6403	1	18	0.502	0.77	0.694	0.757	0.765	0.493	0.818	0.631	0.683	0.684	0.372	0.705
6402	1	13	0.203	0.0618	0.13	0.0624	0.0612	0.185	0.0526	0.105	0.0667	0.147	0.169	0.064
6401	1	12	0.121	0.046	0.074	0.0535	0.0453	0.0347	0.0438	0.054	0.0488	0.0823	0.152	0.0527
55732	1	12	0.387	0.233	0.272	0.17	0.234	0.402	0.236	0.256	0.226	0.254	0.227	0.185
57147	1	12	0.199	0.28	0.447	0.356	0.282	0.223	0.291	0.457	0.288	0.44	0.349	0.345
22920	1	27	3.35e-05	0.0974	0.0038	0.0604	0.104	1.75e-05	0.105	0.006	0.0911	0.0043	0.0121	0.0574
149281	1	3	0.926	0.926	0.957	0.933	0.921	0.941	0.929	0.976	0.942	0.955	0.941	0.951
92344	1	2	0.515	0.435	0.386	0.434	0.435	0.646	0.609	0.596	0.431	0.434	0.415	0.446
5396	1	3	0.485	0.245	0.457	0.246	0.245	0.548	0.268	0.467	0.268	0.47	0.299	0.266
80133	1	9	0.474	0.75	0.431	0.725	0.741	0.607	0.776	0.578	0.722	0.418	0.584	0.716
2328	1	7	0.538	0.576	0.571	0.585	0.584	0.477	0.797	0.841	0.548	0.548	0.654	0.536
2327	1	13	0.289	0.563	0.346	0.469	0.545	0.328	0.567	0.377	0.446	0.346	0.572	0.388
2326	1	7	0.389	0.501	0.197	0.494	0.489	0.45	0.429	0.193	0.428	0.177	0.398	0.445
2329	1	1	0.417	0.417	0.428		0.414	0.468	0.468	0.463	0.435	0.435	0.41
23215	1	17	0.636	0.405	0.46	0.384	0.402	0.794	0.417	0.533	0.396	0.438	0.467	0.37
4653	1	3	0.995	0.994	0.992	0.993	0.995	0.979	0.975	0.961	0.994	0.989	0.995	0.995
8674	1	2	0.927	0.935	0.982	0.95	0.937	0.908	0.764	0.84	0.973	0.978	0.983	0.972
51603	1	5	0.739	0.63	0.641	0.86	0.627	0.767	0.691	0.762	0.6	0.661	0.607	0.874
26052	1	86	0.0104	0.558	0.383	0.608	0.551	0.0701	0.688	0.576	0.506	0.42	0.56	0.46
92346	1	7	0.272	0.0398	0.035	0.0382	0.0397	0.201	0.0259	0.023	0.0417	0.0417	0.0266	0.0434
5279	1	1	0.00995	0.00995	0.0094	0.0109	0.0109	0.00449	0.00449	0.0042	0.0086	0.01	0.0098	0.0115
51430	1	5	0.0614	0.256	0.234	0.257	0.257	0.0831	0.252	0.396	0.259	0.228	0.214	0.296
356	1	2	0.416	0.242	0.265	0.243	0.243	0.384	0.2	0.245	0.244	0.291	0.277	0.252
7292	1	6	0.343	0.199	0.19	0.183	0.199	0.292	0.143	0.143	0.174	0.193	0.273	0.156
9588	1	1	0.337	0.337	0.347	0.335	0.335	0.32	0.32	0.306	0.334	0.334	0.327	0.345
284525	1	16	0.141	0.744	0.581	0.714	0.739	0.0764	0.698	0.576	0.705	0.593	0.462	0.648
339416	1	3	0.272	0.683	0.652	0.711	0.68	0.324	0.71	0.668	0.66	0.626	0.629	0.683
730159	1	1	0.745	0.745	0.754		0.744	0.767	0.767	0.762	0.743	0.743	0.753
27252	1	1	0.667	0.667	0.659	0.663	0.663	0.577	0.577	0.571	0.683	0.683	0.666	0.679
91687	1	1	0.547	0.547	0.527	0.541	0.541	0.483	0.483	0.468	0.573	0.573	0.532	0.554
55157	1	3	0.322	0.883	0.802	0.885	0.885	0.332	0.895	0.817	0.866	0.815	0.857	0.89
84614	1	5	0.549	0.345	0.389	0.27	0.351	0.59	0.39	0.419	0.351	0.416	0.542	0.258
462	1	6	0.303	0.324	0.232	0.335	0.336	0.42	0.357	0.265	0.301	0.267	0.41	0.263
149041	1	1	0.851	0.851	0.834	0.85	0.85	0.915	0.915	0.905	0.863	0.863	0.896	0.854
9910	1	47	0.58	0.758	0.689	0.757	0.761	0.74	0.828	0.645	0.796	0.692	0.749	0.788
27101	1	1	0.182	0.182	0.167	0.182	0.182	0.17	0.17	0.165	0.2	0.2	0.179	0.18
63931	1	1	0.357	0.357	0.355	0.361	0.361	0.366	0.366	0.376	0.385	0.385	0.391	0.361
63923	1	18	0.316	0.231	0.356	0.235	0.236	0.315	0.337	0.371	0.233	0.372	0.395	0.209
9674	1	17	0.00474	0.802	0.791	0.789	0.798	0.00679	0.714	0.847	0.808	0.779	0.789	0.796
7143	1	124	0.0604	0.853	0.958	0.851	0.847	0.138	0.893	0.963	0.868	0.958	0.86	0.873
64326	1	18	0.996	0.772	0.897	0.788	0.741	0.987	0.544	0.82	0.805	0.895	0.939	0.807
60676	1	56	0.445	0.95	0.887	0.948	0.94	0.478	0.949	0.918	0.959	0.894	0.964	0.955
460	1	73	0.396	0.691	0.765	0.673	0.688	0.399	0.565	0.714	0.676	0.79	0.668	0.643
57795	1	21	0.769	0.554	0.657	0.725	0.549	0.847	0.414	0.347	0.535	0.629	0.752	0.718
89866	1	13	0.579	0.411	0.564	0.454	0.413	0.604	0.548	0.604	0.381	0.543	0.448	0.439
9462	1	17	0.163	0.411	0.485	0.368	0.41	0.1	0.457	0.515	0.34	0.491	0.418	0.345
84066	1	4	0.21	0.348	0.251	0.342	0.342	0.238	0.423	0.362	0.353	0.289	0.252	0.317
55103	1	9	0.192	0.0787	0.028	0.0507	0.081	0.346	0.121	0.049	0.0616	0.0242	0.0302	0.0425
9068	1	1	0.607	0.607	0.606	0.61	0.61	0.672	0.672	0.68	0.635	0.635	0.627	0.595
9917	1	5	0.564	0.266	0.434	0.264	0.264	0.598	0.313	0.461	0.294	0.423	0.376	0.285
64222	1	3	0.921	0.732	0.786	0.745	0.725	0.938	0.873	0.909	0.78	0.778	0.814	0.765
27	1	8	0.772	0.671	0.608	0.656	0.663	0.617	0.635	0.535	0.63	0.585	0.779	0.606
6646	1	8	0.0809	0.18	0.171	0.184	0.175	0.0649	0.105	0.084	0.172	0.162	0.185	0.168
126859	1	32	0.344	0.296	0.618	0.267	0.296	0.179	0.296	0.579	0.305	0.629	0.609	0.214
7827	1	2	0.766	0.691	0.706	0.676	0.685	0.858	0.762	0.821	0.717	0.697	0.694	0.683
163589	1	16	0.933	0.968	0.83	0.97	0.965	0.881	0.913	0.782	0.961	0.813	0.897	0.958
148753	1	16	0.319	0.424	0.768	0.421	0.423	0.397	0.277	0.66	0.424	0.768	0.54	0.4
163590	1	3	0.801	0.818	0.847	0.809	0.814	0.736	0.764	0.788	0.85	0.85	0.826	0.84
26092	1	3	0.818	0.779	0.843	0.782	0.774	0.72	0.665	0.692	0.774	0.841	0.78	0.762
9857	1	13	0.0944	0.17	0.399	0.195	0.172	0.157	0.212	0.485	0.15	0.385	0.313	0.201
5768	1	7	0.277	0.651	0.193	0.652	0.651	0.367	0.712	0.377	0.569	0.2	0.511	0.544
89884	1	10	0.0521	0.0253	0.086	0.028	0.0253	0.0473	0.0199	0.076	0.0234	0.0681	0.0151	0.0284
84320	1	16	0.194	0.247	0.094	0.171	0.244	0.225	0.307	0.081	0.231	0.102	0.117	0.164
9213	1	18	0.428	0.772	0.934	0.803	0.772	0.396	0.593	0.786	0.834	0.936	0.925	0.851
57710	1	2	0.93	0.936	0.939	0.932	0.756	0.868	0.879	0.901	0.945	0.941	0.943	0.948
10228	1	12	0.322	0.559	0.458	0.54	0.548	0.444	0.632	0.695	0.5	0.459	0.504	0.495
3140	1	3	0.0131	0.172	0.042	0.0506	0.167	0.0793	0.246	0.071	0.104	0.0449	0.0554	0.0465
777	1	67	0.086	0.0749	0.243	0.0956	0.0788	0.109	0.0531	0.198	0.0788	0.216	0.154	0.0949
127665	1	1	0.916	0.916	0.921	0.917	0.917	0.828	0.828	0.831	0.929	0.929	0.921	0.916
127670	1	4	0.167	0.255	0.253	0.247	0.248	0.214	0.364	0.373	0.23	0.238	0.259	0.233
353299	1	18	0.0169	0.394	0.224	0.393	0.395	0.0311	0.403	0.239	0.361	0.205	0.137	0.31
6041	1	5	0.934	0.903	0.91	0.904	0.913	0.818	0.757	0.803	0.917	0.91	0.905	0.92
85397	1	5	0.466	0.162	0.337	0.165	0.166	0.469	0.16	0.361	0.153	0.352	0.207	0.166
80896	1	4	0.155	0.146	0.113	0.135	0.143	0.179	0.163	0.097	0.125	0.0994	0.132	0.116
1660	1	5	0.763	0.524	0.507	0.535	0.529	0.667	0.525	0.445	0.522	0.525	0.51	0.518
3915	1	19	0.243	0.229	0.381	0.234	0.223	0.294	0.372	0.363	0.218	0.373	0.311	0.231
3918	1	20	0.456	0.142	0.175	0.131	0.139	0.474	0.181	0.276	0.14	0.185	0.19	0.122
23057	1	23	0.191	0.759	0.756	0.78	0.75	0.277	0.799	0.622	0.751	0.757	0.629	0.798
9887	1	5	0.985	0.952	0.968	0.953	0.954	0.991	0.956	0.966	0.971	0.97	0.965	0.959
4688	1	5	0.839	0.951	0.964	0.957	0.953	0.712	0.879	0.87	0.97	0.97	0.946	0.968
10092	1	2	0.0698	0.117	0.045	0.114	0.114	0.0599	0.103	0.034	0.0766	0.0482	0.0786	0.0751
23179	1	54	0.699	0.243	0.265	0.256	0.239	0.795	0.236	0.283	0.303	0.265	0.814	0.189
403314	1	2	0.0227	0.0264	0.016	0.0258	0.0258	0.021	0.0245	0.014	0.025	0.0253	0.0226	0.0218
23127	1	27	0.814	0.814	0.682	0.853	0.814	0.898	0.795	0.811	0.765	0.704	0.836	0.831
116461	1	1	0.974	0.974	0.981	0.974	0.974	0.98	0.98	0.975	1	1	1	0.967
81563	1	36	0.143	0.439	0.433	0.424	0.439	0.355	0.496	0.541	0.412	0.42	0.455	0.401
80267	1	3	0.503	0.32	0.299	0.421	0.319	0.63	0.385	0.416	0.258	0.276	0.384	0.357
116496	1	28	0.0312	0.134	0.012	0.254	0.126	0.0283	0.104	0.01	0.123	0.0182	0.0228	0.23
6045	1	2	0.96	0.949	0.981	0.948	0.948	0.936	0.954	0.909	0.96	0.972	0.962	0.964
81627	1	2	0.066	0.122	0.061	0.12	0.121	0.0304	0.0679	0.026	0.107	0.0576	0.0968	0.097
54823	1	10	0.182	0.208	0.432	0.219	0.21	0.447	0.194	0.378	0.196	0.437	0.17	0.195
10625	1	1	0.495	0.495	0.496	0.494	0.494	0.39	0.39	0.393	0.514	0.514	0.516	0.51
83872	1	48	0.712	0.0203	0.124	0.0189	0.016	0.505	0.02	0.099	0.0263	0.141	0.0673	0.026
10216	1	1	0.232	0.232	0.241	0.232	0.232	0.187	0.187	0.182	0.234	0.234	0.226	0.214
7175	1	9	0.649	0.567	0.551	0.574	0.568	0.595	0.538	0.427	0.54	0.527	0.467	0.572
54953	1	4	0.293	0.318	0.432	0.289	0.32	0.26	0.293	0.413	0.363	0.452	0.325	0.268
5132	1	1	0.879	0.879	0.859		0.877	0.927	0.927	0.924	0.886	0.886	0.9
5743	1	1	0.505	0.505	0.492	0.503	0.503	0.586	0.586	0.592	0.531	0.531	0.535	0.503
5321	1	24	0.472	0.903	0.953	0.916	0.9	0.382	0.901	0.91	0.936	0.956	0.96	0.946
339479	1	44	0.85	0.478	0.827	0.461	0.477	0.956	0.593	0.816	0.491	0.816	0.74	0.487
64407	1	1	0.11	0.11	0.109	0.112	0.112	0.156	0.156	0.167	0.11	0.11	0.116	0.116
431704	1	4	0.624	0.551	0.591	0.576	0.554	0.447	0.506	0.546	0.564	0.593	0.533	0.598
6003	1	6	0.511	0.274	0.303	0.275	0.276	0.628	0.409	0.358	0.263	0.293	0.301	0.276
51377	1	3	1	0.999	1	0.984	0.999	0.976	0.889	0.944	1	1	1	0.974
6738	1	1	0.865	0.865	0.877	0.866	0.866	0.981	0.981	0.979	0.856	0.856	0.889	0.868
79577	1	9	0.787	0.915	0.941	0.916	0.914	0.922	0.927	0.963	0.916	0.952	0.889	0.926
8707	1	3	0.682	0.924	0.928	0.921	0.921	0.499	0.733	0.684	0.945	0.931	0.929	0.909
343450	1	21	0.0293	0.529	0.503	0.521	0.531	0.0363	0.428	0.507	0.483	0.509	0.359	0.46
3075	1	12	0.335	0.91	0.922	0.923	0.904	0.484	0.94	0.931	0.946	0.93	0.946	0.954
10877	1	2	0.445	0.606	0.712		0.603	0.516	0.654	0.739	0.659	0.763	0.635
3080	1	1	0.42	0.42	0.417	0.423	0.423	0.685	0.685	0.696	0.414	0.414	0.408	0.411
81494	1	1	0.159	0.159	0.155		0.165	0.296	0.296	0.299	0.136	0.136	0.17
2165	1	4	0.671	0.438	0.414	0.449	0.447	0.835	0.634	0.594	0.402	0.38	0.457	0.441
259266	1	3	0.447	0.331	0.418	0.339	0.339	0.641	0.528	0.606	0.329	0.406	0.401	0.332
360023	1	1	0.353	0.353	0.358	0.355	0.355	0.4	0.4	0.409	0.371	0.371	0.364	0.355
23418	1	18	0.384	0.371	0.361	0.476	0.371	0.453	0.336	0.6	0.344	0.333	0.448	0.496
163486	1	14	0.168	0.204	0.075	0.22	0.198	0.351	0.3	0.156	0.174	0.0726	0.088	0.205
56956	1	3	0.745	0.799	0.654	0.857	0.803	0.845	0.834	0.737	0.771	0.669	0.748	0.881
140609	1	14	0.803	0.9	0.893	0.918	0.9	0.9	0.916	0.907	0.95	0.882	0.889	0.94
127124	1	1	0.9	0.9	0.883	0.9	0.9	0.82	0.82	0.837	0.908	0.908	0.908	0.884
5788	1	10	0.192	0.061	0.166	0.0683	0.0614	0.245	0.0957	0.224	0.0635	0.135	0.0894	0.0646
2494	1	39	0.378	0.632	0.193	0.614	0.637	0.57	0.714	0.271	0.479	0.192	0.204	0.451
9928	1	5	0.155	0.0474	0.169	0.056	0.0463	0.12	0.0473	0.186	0.0553	0.175	0.058	0.0572
83479	1	3	0.25	0.781	0.899	0.787	0.781	0.13	0.644	0.637	0.828	0.913	0.811	0.825
23271	1	6	0.636	0.141	0.265	0.165	0.138	0.823	0.284	0.438	0.129	0.267	0.427	0.148
55765	1	3	0.00064	0.000104	8e-05	9.63e-05	0.000102	0.00123	0.000182	0.00016	6.6e-05	8.4e-05	0.000204	5.6e-05
23046	1	5	0.00227	0.000363	0.00056	0.000153	0.000329	0.00721	0.000997	0.0022	0.000311	0.000624	0.000198	0.000172
779	1	19	0.299	0.0611	0.08	0.0488	0.0653	0.341	0.142	0.117	0.0575	0.0619	0.104	0.0485
252839	1	6	0.437	0.598	0.768	0.606	0.597	0.42	0.701	0.649	0.637	0.758	0.678	0.644
91156	1	8	0.0313	0.694	0.695	0.64	0.695	0.0375	0.745	0.778	0.686	0.689	0.604	0.624
5317	1	21	0.547	0.461	0.436	0.451	0.459	0.719	0.367	0.429	0.435	0.441	0.717	0.44
7139	1	6	0.629	0.636	0.578	0.524	0.637	0.67	0.684	0.638	0.646	0.588	0.651	0.491
3898	1	2	0.264	0.278	0.318	0.278	0.278	0.375	0.382	0.427	0.302	0.361	0.299	0.287
1465	1	11	0.384	0.0407	0.04	0.0423	0.0429	0.439	0.0441	0.048	0.0423	0.0349	0.0415	0.0465
89796	1	28	0.0748	0.195	0.527	0.196	0.194	0.218	0.148	0.388	0.21	0.544	0.149	0.203
55705	1	2	0.717	0.752	0.689	0.745	0.745	0.62	0.66	0.539	0.703	0.667	0.689	0.698
25802	1	6	0.825	0.383	0.411	0.387	0.389	0.839	0.474	0.502	0.396	0.418	0.453	0.367
10440	1	1	0.359	0.359	0.346	0.353	0.353	0.274	0.274	0.289	0.357	0.357	0.357	0.346
6051	1	3	0.902	0.913	0.937	0.917	0.916	0.93	0.944	0.913	0.923	0.93	0.917	0.924
9283	1	3	0.702	0.829	0.615	0.819	0.824	0.615	0.652	0.442	0.727	0.609	0.76	0.716
127829	1	1	0.972	0.972	0.974	0.972	0.972	0.888	0.888	0.888	0.981	0.981	0.984	0.972
59352	1	23	0.174	0.451	0.479	0.447	0.452	0.256	0.444	0.405	0.404	0.451	0.36	0.437
4660	1	14	0.707	0.196	0.275	0.199	0.197	0.829	0.324	0.526	0.153	0.275	0.127	0.177
127833	1	23	0.00287	0.605	0.813	0.572	0.607	0.0105	0.761	0.85	0.649	0.806	0.764	0.575
10765	1	11	0.859	0.321	0.588	0.351	0.326	0.933	0.471	0.688	0.275	0.525	0.468	0.313
5877	1	2	0.575	0.657	0.548	0.347	0.659	0.718	0.772	0.705	0.64	0.566	0.632	0.339
59349	1	1	0.113	0.113	0.102	0.116	0.116	0.153	0.153	0.154	0.117	0.117	0.135	0.103
51094	1	2	0.124	0.166	0.094	0.897	0.162	0.0845	0.117	0.048	0.125	0.0802	0.143	0.893
51706	1	2	0.104	0.0759	0.187	0.0724	0.0728	0.0557	0.0393	0.116	0.0829	0.184	0.0815	0.078
92703	1	2	0.497	0.404	0.413	0.408	0.407	0.273	0.181	0.209	0.387	0.378	0.396	0.424
8497	1	8	0.596	0.12	0.277	0.133	0.125	0.646	0.135	0.295	0.11	0.265	0.14	0.13
134	1	7	0.769	0.692	0.577	0.684	0.688	0.595	0.437	0.324	0.659	0.549	0.687	0.648
4608	1	2	0.267	0.364	0.43	0.36	0.36	0.167	0.262	0.447	0.378	0.421	0.368	0.377
1116	1	1	0.917	0.917	0.89	0.916	0.916	0.914	0.914	0.914	0.939	0.939	0.935	0.924
1118	1	4	0.358	0.129	0.211	0.137	0.137	0.377	0.124	0.272	0.121	0.231	0.138	0.127
7832	1	1	0.725	0.725	0.727	0.725	0.725	0.783	0.783	0.8	0.741	0.741	0.715	0.722
2331	1	4	0.922	0.952	0.97	0.957	0.954	0.938	0.973	0.977	0.958	0.964	0.967	0.963
493	1	21	0.251	0.59	0.895	0.587	0.586	0.222	0.506	0.89	0.632	0.904	0.7	0.639
54900	1	2	0.937	0.887	0.9	0.874	0.879	0.956	0.934	0.926	0.929	0.928	0.914	0.912
9877	1	9	0.649	0.939	0.963	0.909	0.937	0.693	0.9	0.88	0.947	0.958	0.949	0.934
100381270	1	1	0.677	0.677	0.665	0.671	0.671	0.62	0.62	0.613	0.678	0.678	0.672	0.66
6635	1	3	0.777	0.674	0.662	0.679	0.665	0.945	0.923	0.954	0.679	0.673	0.688	0.702
9580	1	12	0.194	0.59	0.619	0.712	0.586	0.201	0.651	0.647	0.519	0.589	0.488	0.696
55224	1	5	0.135	0.215	0.067	0.215	0.211	0.322	0.371	0.156	0.165	0.0534	0.0619	0.164
5972	1	5	0.0529	0.289	0.06	0.188	0.281	0.0669	0.224	0.132	0.208	0.0595	0.141	0.159
3814	1	5	0.121	0.0258	0.046	0.0254	0.025	0.122	0.0391	0.079	0.024	0.0477	0.0469	0.0225
127845	1	2	0.592	0.602	0.719	0.6	0.609	0.575	0.617	0.55	0.644	0.757	0.661	0.603
22874	1	45	0.254	0.501	0.202	0.527	0.508	0.523	0.676	0.482	0.489	0.244	0.473	0.471
5287	1	5	0.806	0.821	0.899	0.817	0.817	0.964	0.94	0.898	0.889	0.919	0.931	0.881
4194	1	8	0.313	0.095	0.183	0.111	0.0908	0.328	0.0879	0.168	0.0914	0.183	0.202	0.108
10446	1	17	0.407	0.782	0.817	0.776	0.796	0.492	0.703	0.822	0.85	0.813	0.845	0.824
23114	1	44	0.000479	0.0474	0.025	0.0551	0.0476	0.00131	0.0791	0.0046	0.0519	0.022	0.0259	0.0575
6900	1	9	0.171	0.604	0.738	0.524	0.604	0.148	0.539	0.773	0.6	0.727	0.811	0.49
388730	1	2	0.485	0.487	0.554	0.486	0.485	0.264	0.274	0.326	0.504	0.54	0.501	0.494
5929	1	7	0.947	0.911	0.868	0.889	0.904	0.836	0.866	0.622	0.918	0.861	0.872	0.9
25778	1	7	0.688	0.845	0.673	0.874	0.846	0.641	0.795	0.573	0.842	0.672	0.783	0.847
9911	1	9	0.356	0.888	0.788	0.88	0.885	0.385	0.953	0.733	0.915	0.781	0.853	0.89
81788	1	1	0.971	0.971	0.968	0.971	0.971	0.823	0.823	0.832	0.98	0.98	0.98	0.971
55220	1	5	0.769	0.502	0.562	0.502	0.499	0.773	0.685	0.755	0.51	0.599	0.595	0.514
93273	1	2	0.313	0.419	0.279	0.416	0.415	0.336	0.431	0.315	0.364	0.289	0.366	0.344
5129	1	3	0.693	0.644	0.717	0.461	0.645	0.734	0.756	0.747	0.676	0.739	0.657	0.523
148808	1	6	0.694	0.463	0.493	0.61	0.466	0.554	0.375	0.439	0.447	0.504	0.459	0.58
2005	1	1	0.486	0.486	0.494	0.487	0.487	0.502	0.502	0.508	0.504	0.504	0.512	0.489
85414	1	2	0.245	0.283	0.175	0.285	0.285	0.212	0.255	0.173	0.258	0.191	0.242	0.228
64710	1	2	0.0105	0.0204	0.011	0.0199	0.0203	0.0178	0.0314	0.02	0.0141	0.0089	0.0147	0.0152
8934	1	1	0.299	0.299	0.287	0.304	0.304	0.327	0.327	0.311	0.312	0.312	0.324	0.295
254428	1	4	0.0194	0.00753	0.011	0.00849	0.00803	0.0573	0.0155	0.038	0.0075	0.0104	0.0073	0.00879
148811	1	4	0.32	0.403	0.268	0.328	0.404	0.442	0.474	0.511	0.399	0.281	0.398	0.323
115019	1	6	0.481	0.573	0.627	0.563	0.561	0.566	0.545	0.501	0.578	0.636	0.69	0.537
23380	1	13	0.406	0.774	0.547	0.769	0.77	0.533	0.937	0.81	0.734	0.563	0.704	0.743
83593	1	15	0.544	0.236	0.389	0.234	0.233	0.565	0.213	0.358	0.209	0.409	0.291	0.196
1939	1	1	0.148	0.148	0.167	0.151	0.151	0.0846	0.0846	0.096	0.139	0.139	0.146	0.129
9261	1	5	0.511	0.752	0.377	0.684	0.756	0.704	0.812	0.503	0.673	0.402	0.543	0.583
3586	1	1	0.0175	0.0175	0.014	0.0175	0.0175	0.0228	0.0228	0.023	0.0182	0.0168	0.0181	0.0173
29949	1	15	0.0721	0.534	0.61	0.585	0.532	0.11	0.571	0.58	0.5	0.571	0.438	0.558
50604	1	1	0.0796	0.0796	0.072	0.0848	0.0848	0.0747	0.0747	0.083	0.0828	0.0833	0.087	0.0848
11009	1	1	0.046	0.046	0.04	0.0448	0.0448	0.0587	0.0587	0.06	0.0508	0.0492	0.0512	0.0459
9214	1	1	0.046	0.046	0.04	0.0448	0.0448	0.0587	0.0587	0.06	0.0508	0.0492	0.0512	0.0439
5284	1	2	0.142	0.193	0.152	0.194	0.193	0.324	0.297	0.26	0.186	0.168	0.162	0.171
83953	1	2	0.182	0.108	0.236	0.103	0.103	0.216	0.133	0.278	0.106	0.22	0.123	0.122
79098	1	1	0.272	0.272	0.267	0.269	0.269	0.281	0.281	0.294	0.317	0.317	0.278	0.256
5208	1	3	0.249	0.308	0.258		0.315	0.243	0.412	0.189	0.28	0.255	0.303
725	1	3	0.0815	0.0357	0.042	0.0191	0.0363	0.0854	0.0342	0.066	0.033	0.0548	0.0397	0.0203
722	1	3	0.824	0.896	0.95	0.896	0.886	0.797	0.97	0.994	0.947	0.956	0.944	0.942
1604	1	8	0.53	0.559	0.68	0.559	0.574	0.783	0.701	0.647	0.556	0.683	0.697	0.575
1380	1	8	0.763	0.281	0.413	0.286	0.287	0.682	0.247	0.326	0.244	0.4	0.356	0.231
1378	1	12	0.739	0.594	0.772	0.575	0.55	0.665	0.698	0.836	0.627	0.767	0.811	0.602
1379	1	11	0.627	0.658	0.566	0.711	0.649	0.57	0.567	0.383	0.643	0.57	0.726	0.69
4179	1	2	0.62	0.506	0.643	0.464	0.501	0.453	0.342	0.466	0.533	0.672	0.558	0.435
947	1	11	0.0161	0.0389	0.022	0.0673	0.0401	0.0384	0.0637	0.048	0.0353	0.0309	0.101	0.0654
5362	1	52	0.198	0.526	0.431	0.563	0.532	0.224	0.461	0.401	0.411	0.469	0.392	0.442
642587	1	3	0.0613	0.361	0.314	0.366	0.366	0.119	0.371	0.337	0.363	0.308	0.324	0.395
57172	1	7	0.908	0.876	0.634	0.795	0.877	0.869	0.871	0.472	0.853	0.642	0.844	0.762
3914	1	20	0.13	0.00787	0.034	0.0165	0.00856	0.13	0.0108	0.03	0.0082	0.0387	0.0307	0.0176
3290	1	5	0.898	0.803	0.814	0.742	0.794	0.797	0.697	0.614	0.829	0.801	0.838	0.75
80342	1	6	0.683	0.835	0.889	0.762	0.84	0.542	0.625	0.724	0.886	0.899	0.92	0.778
148304	1	1	0.364	0.364	0.361	0.362	0.362	0.478	0.478	0.501	0.37	0.37	0.359	0.372
3664	1	8	0.122	0.125	0.212	0.12	0.127	0.12	0.117	0.169	0.128	0.211	0.179	0.114
27042	1	6	0.832	0.577	0.597	0.698	0.575	0.667	0.347	0.342	0.536	0.591	0.764	0.668
255928	1	24	0.274	0.759	0.918	0.751	0.754	0.393	0.759	0.945	0.796	0.918	0.947	0.801
55733	1	76	0.869	0.675	0.745	0.487	0.674	0.89	0.616	0.8	0.7	0.739	0.749	0.522
3756	1	76	0.125	0.463	0.55	0.392	0.462	0.154	0.593	0.655	0.441	0.542	0.397	0.409
55758	1	2	0.949	0.94	0.951	0.938	0.938	0.955	0.968	0.947	0.95	0.956	0.952	0.956
7188	1	9	0.479	0.463	0.57	0.386	0.458	0.501	0.516	0.534	0.464	0.603	0.457	0.361
343035	1	3	0.74	0.497	0.563	0.329	0.498	0.771	0.568	0.572	0.495	0.543	0.588	0.306
7779	1	1	0.764	0.764	0.767	0.765	0.765	0.824	0.824	0.83	0.755	0.755	0.763	0.765
4751	1	3	0.226	0.373	0.136	0.374	0.374	0.362	0.479	0.234	0.27	0.129	0.241	0.285
9926	1	5	0.675	0.649	0.62	0.654	0.651	0.689	0.636	0.503	0.66	0.619	0.69	0.67
25896	1	11	0.68	0.622	0.495	0.541	0.613	0.719	0.608	0.719	0.613	0.501	0.545	0.526
51514	1	5	0.519	0.863	0.669	0.858	0.857	0.365	0.916	0.86	0.85	0.68	0.772	0.842
5525	1	6	0.707	0.569	0.748	0.601	0.56	0.729	0.525	0.716	0.578	0.776	0.574	0.616
55248	1	7	0.886	0.648	0.788	0.589	0.647	0.905	0.654	0.775	0.658	0.793	0.652	0.605
467	1	12	0.148	0.423	0.168	0.422	0.422	0.11	0.463	0.223	0.338	0.172	0.242	0.335
149647	1	1	0.916	0.916	0.905	0.915	0.915	0.963	0.963	0.965	0.946	0.946	0.947	0.92
55509	1	1	0.214	0.214	0.197	0.215	0.215	0.304	0.304	0.295	0.232	0.232	0.231	0.214
25936	1	8	0.242	0.195	0.37	0.193	0.197	0.335	0.293	0.482	0.187	0.349	0.2	0.187
128387	1	4	0.0758	0.177	0.288	0.214	0.178	0.107	0.226	0.364	0.157	0.234	0.152	0.227
149643	1	4	0.425	0.536	0.454	0.523	0.522	0.367	0.575	0.528	0.512	0.452	0.484	0.504
28982	1	6	0.825	0.728	0.712	0.733	0.73	0.829	0.693	0.655	0.749	0.695	0.739	0.772
79805	1	4	0.326	0.316	0.389	0.311	0.312	0.486	0.326	0.624	0.312	0.383	0.279	0.296
90806	1	4	0.117	0.187	0.363	0.177	0.187	0.238	0.261	0.559	0.186	0.374	0.184	0.179
26750	1	9	0.489	0.205	0.208	0.193	0.206	0.441	0.134	0.14	0.198	0.21	0.196	0.198
5629	1	5	0.449	0.433	0.477	0.478	0.431	0.429	0.422	0.512	0.444	0.419	0.448	0.464
56950	1	20	0.147	0.473	0.433	0.479	0.48	0.163	0.515	0.531	0.446	0.512	0.514	0.449
5784	1	63	0.141	0.697	0.807	0.703	0.707	0.145	0.694	0.849	0.756	0.837	0.705	0.751
1063	1	9	0.396	0.585	0.387	0.579	0.578	0.408	0.59	0.436	0.507	0.386	0.522	0.517
3776	1	47	0.0724	0.822	0.521	0.814	0.823	0.0832	0.766	0.589	0.872	0.581	0.664	0.842
7399	1	139	0.583	0.802	0.848	0.719	0.792	0.654	0.718	0.671	0.822	0.835	0.798	0.757
2104	1	148	0.022	0.322	0.124	0.315	0.33	0.0542	0.371	0.226	0.383	0.14	0.144	0.352
55105	1	18	0.29	0.799	0.834	0.771	0.8	0.273	0.889	0.877	0.816	0.815	0.843	0.78
128153	1	20	0.627	0.168	0.236	0.207	0.162	0.525	0.166	0.218	0.144	0.229	0.161	0.191
51018	1	2	0.645	0.898	0.875	0.891	0.891	0.612	0.889	0.858	0.908	0.868	0.872	0.865
7042	1	15	0.372	0.114	0.201	0.164	0.121	0.346	0.15	0.304	0.132	0.223	0.361	0.177
127018	1	4	0.913	0.666	0.741	0.714	0.665	0.86	0.642	0.726	0.689	0.762	0.8	0.687
55532	1	2	0.965	0.973	0.96	0.977	0.975	0.987	0.989	0.988	0.973	0.968	0.964	0.966
2058	1	22	0.649	0.954	1	0.947	0.953	0.57	0.943	0.999	0.998	0.998	0.999	0.991
10380	1	3	0.1	0.0412	0.088	0.0423	0.0425	0.164	0.0777	0.114	0.044	0.105	0.0426	0.0466
55699	1	2	0.0797	0.0736	0.042	0.0775	0.0769	0.0517	0.0664	0.032	0.0666	0.0535	0.0671	0.0704
25782	1	12	0.176	0.0224	0.102	0.0215	0.0219	0.18	0.00722	0.046	0.0251	0.109	0.0313	0.0251
4139	1	5	0.218	0.158	0.156	0.165	0.158	0.222	0.258	0.245	0.14	0.153	0.0877	0.172
79762	1	3	0.535	0.309	0.409	0.372	0.296	0.498	0.282	0.304	0.305	0.4	0.352	0.348
54996	1	5	0.121	0.293	0.435	0.382	0.294	0.207	0.37	0.445	0.314	0.443	0.259	0.405
64757	1	9	0.719	0.565	0.757	0.559	0.559	0.869	0.734	0.811	0.595	0.782	0.64	0.541
3142	1	2	0.944	0.946	0.969	0.945	0.946	0.938	0.94	0.97	0.962	0.966	0.953	0.957
11221	1	6	0.242	0.823	0.635	0.771	0.828	0.204	0.784	0.684	0.798	0.665	0.783	0.77
79802	1	2	0.654	0.823	0.86	0.827	0.83	0.621	0.766	0.689	0.875	0.859	0.859	0.862
9015	1	2	0.595	0.615	0.635	0.612	0.613	0.508	0.528	0.652	0.657	0.661	0.638	0.64
375056	1	6	0.831	0.976	0.991	0.913	0.974	0.859	0.969	0.992	0.994	0.994	0.986	0.944
64853	1	2	0.737	0.793	0.731	0.442	0.793	0.59	0.648	0.524	0.737	0.701	0.749	0.437
148362	1	2	0.89	0.897	0.87	0.895	0.895	0.972	0.977	0.976	0.883	0.87	0.897	0.891
400823	1	1	0.54	0.54	0.549	0.542	0.542	0.404	0.404	0.39	0.516	0.516	0.554	0.533
84976	1	16	0.886	0.922	0.969	0.925	0.914	0.95	0.95	0.994	0.945	0.969	0.942	0.953
7100	1	7	0.286	0.0659	0.071	0.0567	0.0636	0.28	0.0644	0.079	0.066	0.0668	0.0652	0.0593
55061	1	21	0.994	0.956	0.846	0.972	0.956	0.982	0.973	0.785	0.978	0.845	0.956	0.974
388743	1	5	0.295	0.771	0.657	0.772	0.761	0.3	0.695	0.547	0.784	0.697	0.716	0.769
824	1	13	0.657	0.622	0.568	0.605	0.61	0.472	0.567	0.577	0.568	0.596	0.48	0.547
7159	1	12	0.923	0.471	0.582	0.485	0.466	0.885	0.46	0.557	0.503	0.629	0.621	0.507
23219	1	3	0.7	0.287	0.336	0.3	0.287	0.702	0.273	0.302	0.296	0.333	0.3	0.286
8560	1	1	0.591	0.591	0.589	0.594	0.594	0.55	0.55	0.538	0.608	0.608	0.614	0.601
4931	1	6	0.282	0.212	0.177	0.197	0.21	0.119	0.115	0.07	0.2	0.181	0.102	0.18
29097	1	2	0.1	0.0736	0.093	0.0797	0.0801	0.154	0.117	0.154	0.0731	0.0978	0.0769	0.0812
80232	1	4	0.489	0.336	0.464	0.347	0.347	0.56	0.39	0.551	0.325	0.473	0.42	0.325
149111	1	39	0.0405	0.498	0.286	0.559	0.499	0.061	0.465	0.214	0.417	0.337	0.114	0.485
127602	1	43	0.00639	0.252	0.004	0.181	0.254	9.81e-05	0.266	0.0064	0.176	0.0042	0.0114	0.127
3930	1	2	0.103	0.363	0.352	0.202	0.357	0.173	0.428	0.326	0.334	0.327	0.36	0.198
55740	1	19	0.274	0.043	0.183	0.0344	0.0424	0.216	0.0233	0.059	0.0449	0.202	0.0552	0.0443
2052	1	7	0.41	0.866	0.817	0.877	0.863	0.958	0.834	0.936	0.876	0.836	0.917	0.872
9725	1	10	0.685	0.586	0.595	0.578	0.595	0.703	0.535	0.46	0.57	0.597	0.633	0.61
64746	1	4	0.00617	0.118	0.037	0.0315	0.117	0.0196	0.189	0.052	0.0829	0.0312	0.0359	0.0305
286826	1	4	0.53	0.565	0.474	0.589	0.557	0.638	0.636	0.688	0.5	0.486	0.6	0.527
142	1	15	0.351	0.403	0.578	0.405	0.404	0.415	0.517	0.626	0.416	0.566	0.42	0.418
375057	1	21	0.295	0.313	0.066	0.245	0.313	0.349	0.298	0.069	0.273	0.0674	0.0589	0.208
3707	1	15	0.42	0.333	0.646	0.353	0.345	0.474	0.326	0.648	0.337	0.648	0.534	0.331
5664	1	5	0.886	0.935	0.982	0.925	0.942	0.733	0.919	0.944	0.972	0.977	0.947	0.947
56997	1	5	0.72	0.291	0.41	0.294	0.293	0.799	0.363	0.54	0.307	0.453	0.366	0.267
8476	1	62	0.299	0.641	0.711	0.603	0.639	0.311	0.746	0.769	0.68	0.701	0.694	0.574
339500	1	11	0.484	0.394	0.618	0.362	0.396	0.447	0.396	0.581	0.404	0.593	0.453	0.407
116841	1	8	0.554	0.959	0.963	0.958	0.961	0.714	0.977	0.951	0.987	0.968	0.949	0.976
339501	1	4	0.603	0.546	0.475	0.523	0.546	0.529	0.499	0.397	0.526	0.493	0.45	0.504
7483	1	2	0.347	0.264	0.245	0.265	0.266	0.432	0.289	0.289	0.253	0.244	0.243	0.279
89780	1	1	0.517	0.517	0.526	0.514	0.514	0.676	0.676	0.677	0.522	0.522	0.536	0.523
375	1	2	0.362	0.172	0.183	0.171	0.171	0.479	0.267	0.299	0.17	0.197	0.183	0.152
84033	1	19	0.258	0.488	0.556	0.477	0.486	0.419	0.514	0.52	0.49	0.546	0.465	0.466
81559	1	1	0.707	0.707	0.718	0.704	0.704	0.665	0.665	0.689	0.742	0.742	0.735	0.707
58480	1	7	0.952	0.915	0.89	0.92	0.921	0.932	0.897	0.833	0.885	0.866	0.941	0.913
5867	1	5	0.263	0.714	0.576	0.611	0.718	0.221	0.733	0.644	0.672	0.586	0.67	0.565
10638	1	1	0.332	0.332	0.33	0.338	0.338	0.383	0.383	0.38	0.346	0.346	0.333	0.343
126731	1	6	0.108	0.885	0.824	0.885	0.882	0.311	0.874	0.714	0.904	0.806	0.836	0.905
55746	1	11	0.253	0.401	0.158	0.405	0.402	0.342	0.424	0.192	0.355	0.18	0.17	0.371
23456	1	1	0.297	0.297	0.301	0.298	0.298	0.317	0.317	0.286	0.303	0.303	0.293	0.313
27097	1	4	0.551	0.912	0.953	0.908	0.911	0.469	0.734	0.835	0.948	0.967	0.942	0.942
9816	1	5	0.0131	0.64	0.494	0.654	0.639	0.0208	0.641	0.728	0.6	0.508	0.506	0.627
2590	1	56	0.012	0.00608	0.057	0.0105	0.00698	0.0113	0.0108	0.055	0.0078	0.0679	0.025	0.0155
79605	1	17	0.316	0.304	0.462	0.327	0.303	0.181	0.195	0.523	0.349	0.43	0.192	0.339
22796	1	10	0.589	0.441	0.566	0.377	0.446	0.365	0.369	0.484	0.391	0.552	0.354	0.332
183	1	3	0.445	0.236	0.243	0.241	0.241	0.517	0.245	0.317	0.21	0.231	0.309	0.205
10753	1	13	0.0515	0.109	0.049	0.133	0.106	0.0439	0.135	0.129	0.0868	0.0564	0.21	0.103
84886	1	6	0.305	0.4	0.621	0.458	0.4	0.236	0.377	0.644	0.428	0.625	0.395	0.45
79573	1	23	0.315	0.14	0.392	0.141	0.138	0.244	0.178	0.205	0.161	0.399	0.204	0.182
64801	1	2	0.236	0.43	0.287	0.158	0.419	0.282	0.387	0.245	0.341	0.267	0.351	0.172
375061	1	2	0.0164	0.104	0.103	0.0972	0.0975	0.0174	0.108	0.093	0.099	0.0912	0.0962	0.0929
440730	1	10	0.266	0.298	0.752	0.293	0.296	0.424	0.428	0.781	0.347	0.745	0.347	0.336
128061	1	6	0.335	0.415	0.707	0.369	0.411	0.535	0.463	0.777	0.44	0.693	0.485	0.386
8443	1	4	0.0314	0.235	0.251	0.235	0.231	0.0528	0.192	0.213	0.215	0.229	0.241	0.239
54583	1	9	0.634	0.951	0.943	0.957	0.954	0.681	0.971	0.994	0.972	0.924	0.951	0.97
7257	1	2	0.759	0.794	0.704	0.807	0.801	0.91	0.926	0.905	0.768	0.723	0.764	0.78
27185	1	83	0.00256	0.9	0.537	0.928	0.897	0.00256	0.915	0.742	0.899	0.564	0.611	0.914
57568	1	46	0.0726	0.172	0.341	0.173	0.173	0.0519	0.238	0.27	0.172	0.325	0.0937	0.173
54627	1	2	0.717	0.637	0.674	0.644	0.629	0.571	0.478	0.507	0.642	0.664	0.659	0.642
84284	1	2	0.45	0.509	0.387	0.5	0.506	0.401	0.494	0.325	0.459	0.393	0.443	0.412
80003	1	56	0.0596	0.357	0.093	0.294	0.358	0.0719	0.326	0.081	0.283	0.0886	0.332	0.265
84451	1	19	0.299	0.597	0.128	0.653	0.589	0.434	0.772	0.325	0.507	0.129	0.165	0.559
3775	1	16	0.0817	0.00116	0.0012	0.00132	0.0015	0.0573	0.00114	0.0018	0.0025	0.0017	0.0014	0.00207
148641	1	79	0.381	0.407	0.753	0.331	0.408	0.613	0.641	0.879	0.464	0.729	0.26	0.355
388753	1	4	0.0998	0.173	0.096	0.179	0.18	0.0772	0.174	0.098	0.17	0.109	0.111	0.168
6894	1	20	0.0977	0.26	0.368	0.32	0.259	0.143	0.347	0.355	0.258	0.365	0.116	0.311
359948	1	1	0.175	0.175	0.178	0.174	0.174	0.192	0.192	0.18	0.173	0.173	0.191	0.171
9804	1	1	0.845	0.845	0.851	0.847	0.847	0.761	0.761	0.777	0.866	0.866	0.844	0.847
51742	1	16	0.121	0.861	0.859	0.844	0.858	0.134	0.792	0.763	0.883	0.855	0.887	0.822
9453	1	1	0.711	0.711	0.703	0.709	0.709	0.588	0.588	0.592	0.731	0.731	0.686	0.717
6905	1	6	0.209	0.54	0.446	0.436	0.53	0.178	0.414	0.417	0.483	0.459	0.321	0.406
148789	1	4	0.965	0.878	0.943	0.822	0.867	0.87	0.855	0.853	0.921	0.933	0.957	0.872
2786	1	19	0.409	0.844	0.385	0.869	0.82	0.305	0.831	0.29	0.828	0.351	0.608	0.829
1130	1	10	0.515	0.335	0.36	0.34	0.331	0.517	0.33	0.282	0.324	0.377	0.397	0.335
4811	1	16	0.345	0.361	0.405	0.399	0.357	0.338	0.278	0.328	0.364	0.393	0.299	0.393
7107	1	5	0.737	0.888	0.943	0.917	0.898	0.827	0.889	0.985	0.923	0.939	0.913	0.927
56605	1	20	0.588	0.138	0.222	0.156	0.142	0.628	0.254	0.393	0.158	0.25	0.201	0.151
128178	1	20	0.00471	0.169	0.185	0.151	0.174	0.014	0.187	0.282	0.128	0.154	0.0328	0.158
3964	1	9	0.222	0.025	0.076	0.0233	0.0251	0.255	0.0297	0.092	0.0281	0.0829	0.104	0.0271
55127	1	18	0.0716	0.0435	0.074	0.0444	0.0433	0.0966	0.0488	0.1	0.0476	0.0835	0.0926	0.0459
88	1	15	0.018	0.00456	0.078	0.00391	0.0069	0.0412	0.00768	0.078	0.0097	0.0807	0.007	0.00809
4548	1	25	0.418	0.777	0.633	0.778	0.772	0.585	0.613	0.721	0.773	0.554	0.729	0.786
6262	1	148	0.0689	0.207	0.15	0.197	0.209	0.174	0.355	0.344	0.208	0.187	0.258	0.157
57829	1	7	0.508	0.628	0.782	0.678	0.637	0.383	0.649	0.722	0.664	0.762	0.658	0.713
1131	1	52	0.742	0.777	0.535	0.728	0.778	0.757	0.725	0.69	0.77	0.527	0.836	0.697
56776	1	76	0.0371	0.239	0.588	0.244	0.251	0.158	0.32	0.552	0.268	0.661	0.168	0.251
64388	1	20	0.445	0.495	0.385	0.512	0.539	0.416	0.38	0.367	0.442	0.369	0.429	0.452
6000	1	103	0.95	0.953	0.675	0.948	0.949	0.863	0.972	0.41	0.955	0.674	0.995	0.943
2271	1	4	0.155	0.405	0.189	0.34	0.399	0.129	0.414	0.133	0.347	0.169	0.226	0.272
8564	1	17	0.31	0.401	0.236	0.364	0.394	0.223	0.221	0.145	0.358	0.25	0.223	0.295
23596	1	9	0.203	0.217	0.072	0.22	0.213	0.149	0.177	0.057	0.208	0.067	0.181	0.212
128025	1	22	0.468	0.173	0.428	0.167	0.165	0.42	0.109	0.379	0.18	0.465	0.298	0.179
9156	1	9	0.0814	0.556	0.513	0.554	0.554	0.0626	0.435	0.441	0.52	0.528	0.435	0.503
200150	1	93	0.216	0.0105	0.006	0.017	0.0109	0.326	0.00941	0.0106	0.011	0.0067	0.0149	0.0143
9859	1	3	0.552	0.419	0.473	0.515	0.42	0.623	0.464	0.637	0.419	0.459	0.434	0.54
10806	1	23	0.847	0.515	0.717	0.521	0.518	0.772	0.378	0.603	0.504	0.684	0.678	0.497
10000	1	20	0.924	0.939	0.915	0.922	0.939	0.902	0.775	0.863	0.963	0.907	0.955	0.951
200159	1	12	0.102	0.331	0.118	0.294	0.334	0.155	0.406	0.278	0.297	0.121	0.172	0.237
159	1	4	0.987	0.978	0.993	0.959	0.978	0.987	0.988	0.959	0.988	0.994	0.987	0.984
257044	1	25	0.152	0.801	0.555	0.825	0.804	0.281	0.884	0.553	0.773	0.569	0.565	0.772
51029	1	5	0.346	0.495	0.598	0.497	0.492	0.314	0.435	0.46	0.476	0.589	0.437	0.455
116228	1	1	0.461	0.461	0.452	0.463	0.463	0.701	0.701	0.696	0.474	0.473	0.458	0.469
84288	1	24	0.472	0.198	0.3	0.198	0.196	0.632	0.135	0.221	0.164	0.289	0.32	0.182
55083	1	98	0.0716	0.634	0.569	0.793	0.624	0.0217	0.491	0.689	0.64	0.573	0.542	0.778
64754	1	117	0.0643	0.724	0.302	0.642	0.712	0.124	0.735	0.266	0.644	0.332	0.334	0.6
64216	1	7	0.473	0.343	0.378	0.366	0.342	0.456	0.374	0.397	0.284	0.359	0.544	0.295
163882	1	7	0.00286	0.058	0.024	0.0579	0.0583	0.00728	0.0816	0.056	0.0433	0.0333	0.0198	0.0467
51097	1	5	0.69	0.83	0.556	0.778	0.816	0.655	0.797	0.514	0.77	0.563	0.658	0.738
100130097	1	5	0.575	0.633	0.653	0.703	0.632	0.701	0.713	0.733	0.651	0.684	0.682	0.717
25909	1	7	0.997	0.999	1	0.998	0.999	0.968	0.867	0.957	1	1	1	1
57116	1	3	0.58	0.442	0.622	0.469	0.436	0.535	0.447	0.602	0.472	0.638	0.435	0.483
93474	1	5	0.504	0.867	0.591	0.859	0.864	0.348	0.785	0.458	0.813	0.589	0.717	0.783
7678	1	5	0.463	0.317	0.249	0.319	0.318	0.35	0.185	0.139	0.29	0.228	0.31	0.286
84838	1	8	0.851	0.911	0.818	0.841	0.909	0.911	0.879	0.853	0.894	0.798	0.926	0.803
114548	1	3	0.568	0.625	0.651	0.628	0.624	0.375	0.515	0.648	0.682	0.641	0.635	0.655
127623	1	1	0.628	0.628	0.619	0.628	0.628	0.757	0.757	0.769	0.638	0.638	0.637	0.646
81472	1	1	0.528	0.528	0.512	0.529	0.529	0.554	0.554	0.558	0.573	0.573	0.555	0.519
148823	1	2	0.0937	0.0685	0.046	0.0678	0.07	0.14	0.103	0.085	0.0669	0.062	0.0622	0.0644
343169	1	1	0.578	0.578	0.592	0.574	0.574	0.803	0.803	0.809	0.581	0.581	0.616	0.562
391189	1	1	0.7	0.7	0.71	0.703	0.703	0.968	0.968	0.971	0.741	0.741	0.697	0.706
25893	1	5	0.914	0.886	0.937	0.887	0.887	0.75	0.748	0.86	0.942	0.948	0.95	0.932
284521	1	13	0.819	0.919	0.897	0.92	0.921	0.955	0.919	0.959	0.972	0.912	0.917	0.927
391191	1	1	0.321	0.321	0.298	0.319	0.319	0.418	0.418	0.427	0.316	0.316	0.317	0.334
26246	1	1	0.795	0.795	0.821	0.794	0.794	0.672	0.672	0.672	0.825	0.825	0.775	0.83
254879	1	1	0.152	0.152	0.151	0.155	0.155	0.18	0.18	0.186	0.147	0.147	0.141	0.158
80851	1	2	0.262	0.145	0.296	0.144	0.146	0.384	0.24	0.37	0.181	0.324	0.141	0.151
79894	1	1	0.753	0.753	0.764	0.754	0.754	0.677	0.677	0.676	0.752	0.752	0.771	0.767
26751	2	15	0.422	0.917	0.896	0.906	0.914	0.477	0.827	0.878	0.929	0.884	0.924	0.922
52	2	2	0.717	0.702	0.631	0.7	0.7	0.687	0.61	0.643	0.69	0.658	0.706	0.701
285016	2	4	0.967	0.87	0.954	0.894	0.869	0.908	0.799	0.885	0.921	0.95	0.931	0.938
129787	2	1	0.261	0.261	0.264		0.261	0.324	0.324	0.318	0.286	0.286	0.259
54221	2	55	0.426	0.435	0.194	0.41	0.433	0.257	0.374	0.153	0.449	0.201	0.479	0.391
7173	2	14	0.151	0.143	0.054	0.124	0.143	0.117	0.113	0.057	0.116	0.0541	0.201	0.124
7837	2	13	0.848	0.554	0.772	0.587	0.562	0.863	0.555	0.875	0.568	0.766	0.598	0.593
23040	2	70	0.099	0.445	0.093	0.414	0.438	0.109	0.233	0.057	0.386	0.113	0.33	0.395
7260	2	35	0.675	0.647	0.156	0.616	0.646	0.382	0.58	0.138	0.549	0.127	0.49	0.508
51112	2	12	0.571	0.785	0.884	0.789	0.772	0.591	0.877	0.879	0.804	0.877	0.709	0.8
55256	2	2	0.0695	0.0245	0.041	0.0253	0.025	0.0305	0.0101	0.015	0.0202	0.0337	0.0281	0.0232
78989	2	11	0.829	0.762	0.801	0.731	0.766	0.796	0.727	0.695	0.75	0.78	0.634	0.73
55821	2	7	0.979	0.933	0.969	0.947	0.935	0.98	0.928	0.973	0.968	0.983	0.971	0.961
728597	2	40	0.935	0.733	0.48	0.686	0.715	0.969	0.843	0.664	0.678	0.472	0.544	0.639
6664	2	1	0.468	0.468	0.455	0.466	0.466	0.499	0.499	0.491	0.514	0.514	0.508	0.464
129607	2	2	0.0317	0.0542	0.07	0.0549	0.0519	0.0351	0.0582	0.073	0.0521	0.0619	0.0539	0.0539
91543	2	3	0.115	0.0756	0.068	0.0652	0.078	0.256	0.12	0.11	0.0679	0.0743	0.078	0.066
9781	2	45	0.533	0.504	0.223	0.476	0.508	0.475	0.467	0.165	0.473	0.234	0.45	0.419
3398	2	1	0.107	0.107	0.104	0.113	0.113	0.107	0.108	0.106	0.126	0.126	0.109	0.121
57498	2	8	0.619	0.34	0.267	0.336	0.336	0.641	0.427	0.28	0.339	0.27	0.301	0.314
129642	2	6	0.0364	0.0138	0.016	0.0153	0.0152	0.0461	0.0207	0.017	0.016	0.0097	0.0268	0.0164
8853	2	28	0.0296	0.409	0.387	0.441	0.415	0.0232	0.491	0.288	0.341	0.319	0.203	0.386
9270	2	2	0.998	0.965	0.998	0.962	0.961	0.886	0.781	0.819	0.99	0.991	0.993	0.991
51692	2	3	0.263	0.738	0.638	0.729	0.737	0.353	0.637	0.445	0.718	0.641	0.659	0.7
285148	2	6	0.0829	0.95	0.975	0.945	0.95	0.0545	0.941	0.933	0.97	0.97	0.929	0.953
6868	2	8	0.583	0.902	0.933	0.9	0.903	0.627	0.909	0.941	0.922	0.925	0.912	0.925
10971	2	9	0.623	0.147	0.319	0.146	0.149	0.593	0.115	0.382	0.145	0.332	0.223	0.156
9014	2	18	0.188	0.726	0.642	0.717	0.723	0.264	0.69	0.614	0.721	0.659	0.737	0.703
29841	2	13	0.681	0.225	0.419	0.199	0.225	0.733	0.218	0.326	0.223	0.4	0.35	0.222
8462	2	4	0.423	0.394	0.548	0.396	0.397	0.151	0.162	0.298	0.436	0.594	0.391	0.421
192668	2	1	0.0172	0.0172	0.016		0.0172	0.0102	0.0102	0.0114	0.0163	0.0167	0.0185
348738	2	14	0.718	0.74	0.892	0.713	0.746	0.763	0.8	0.819	0.801	0.898	0.772	0.772
3241	2	19	0.77	0.474	0.59	0.423	0.479	0.838	0.668	0.775	0.491	0.607	0.624	0.425
4953	2	2	0.165	0.0742	0.06	0.0743	0.0746	0.152	0.0612	0.056	0.0705	0.0779	0.0717	0.0698
79954	2	22	0.122	0.624	0.193	0.593	0.616	0.286	0.715	0.25	0.538	0.175	0.273	0.563
245973	2	8	0.856	0.834	0.475	0.803	0.831	0.753	0.747	0.328	0.769	0.479	0.654	0.721
10130	2	26	0.2	0.387	0.64	0.382	0.387	0.199	0.358	0.565	0.368	0.665	0.577	0.342
130813	2	6	0.943	0.717	0.814	0.704	0.704	0.889	0.775	0.867	0.771	0.836	0.875	0.742
130814	2	1	0.597	0.597	0.601	0.593	0.593	0.654	0.654	0.676	0.597	0.597	0.594	0.584
9475	2	14	0.122	0.551	0.499	0.479	0.558	0.117	0.468	0.401	0.533	0.503	0.572	0.459
650157	2	6	0.962	0.579	0.696	0.5	0.579	0.963	0.6	0.793	0.618	0.693	0.613	0.538
1876	2	1	0.23	0.23	0.251	0.23	0.23	0.293	0.293	0.252	0.231	0.231	0.249	0.222
9687	2	20	0.428	0.721	0.825	0.725	0.726	0.331	0.563	0.553	0.734	0.839	0.607	0.75
23620	2	1	0.651	0.651	0.677	0.653	0.653	0.729	0.729	0.731	0.643	0.643	0.692	0.66
23175	2	23	0.0441	0.264	0.43	0.256	0.261	0.0371	0.334	0.587	0.285	0.496	0.24	0.279
28951	2	8	0.713	0.882	0.973	0.822	0.879	0.852	0.905	0.977	0.949	0.975	0.956	0.926
51594	2	59	0.235	0.721	0.847	0.768	0.725	0.129	0.72	0.761	0.781	0.865	0.921	0.774
1653	2	5	0.213	0.417	0.224	0.413	0.413	0.169	0.346	0.211	0.387	0.222	0.262	0.368
81553	2	27	0.0629	0.109	0.454	0.141	0.115	0.189	0.32	0.706	0.142	0.484	0.197	0.152
7447	2	23	0.311	0.0477	0.158	0.0579	0.0511	0.363	0.0232	0.071	0.0514	0.152	0.0966	0.061
79677	2	5	0.602	0.135	0.211	0.101	0.141	0.452	0.0959	0.189	0.11	0.222	0.354	0.0981
348654	2	5	0.219	0.413	0.189	0.327	0.422	0.117	0.329	0.127	0.328	0.214	0.364	0.259
3790	2	7	0.582	0.12	0.219	0.0959	0.119	0.481	0.269	0.517	0.133	0.21	0.229	0.0997
100526794	2	1	0.144	0.144	0.152	0.146	0.146	0.138	0.138	0.143	0.156	0.156	0.14	0.141
93034	2	1	0.144	0.144	0.152	0.146	0.146	0.138	0.138	0.143	0.156	0.156	0.14	0.151
130502	2	1	0.637	0.637	0.655	0.638	0.638	0.994	0.994	0.996	0.64	0.64	0.657	0.64
57539	2	3	0.989	0.968	0.977	0.955	0.964	0.949	0.87	0.865	0.975	0.976	0.98	0.953
4148	2	4	0.497	0.498	0.37	0.498	0.5	0.402	0.378	0.462	0.482	0.355	0.515	0.49
9741	2	5	0.911	0.539	0.64	0.532	0.537	0.767	0.338	0.373	0.545	0.639	0.659	0.532
6382	2	1	0.0671	0.0671	0.065	0.0669	0.0669	0.108	0.108	0.114	0.0747	0.0728	0.0675	0.0672
23369	2	4	0.367	0.225	0.226	0.167	0.224	0.475	0.364	0.376	0.21	0.235	0.215	0.148
64342	2	5	0.885	0.834	0.728	0.833	0.825	0.925	0.826	0.787	0.777	0.697	0.774	0.801
60526	2	8	0.632	0.459	0.522	0.507	0.462	0.704	0.563	0.701	0.47	0.543	0.372	0.471
338	2	6	0.568	0.248	0.162	0.248	0.247	0.56	0.248	0.138	0.212	0.203	0.279	0.216
114818	2	74	0.323	0.293	0.424	0.541	0.304	0.276	0.337	0.546	0.248	0.395	0.321	0.267
54454	2	16	0.00315	0.239	0.112	0.234	0.233	0.000722	0.224	0.08	0.203	0.134	0.208	0.224
165324	2	4	0.252	0.267	0.21	0.262	0.262	0.269	0.273	0.177	0.251	0.218	0.232	0.224
80304	2	1	0.189	0.189	0.176		0.187	0.2	0.2	0.211	0.167	0.167	0.187
51639	2	1	0.209	0.209	0.191		0.209	0.215	0.215	0.225	0.185	0.185	0.206
9540	2	1	0.0501	0.0501	0.047	0.0499	0.0499	0.0494	0.0494	0.046	0.0523	0.0539	0.0496	0.0509
375189	2	1	0.0475	0.0475	0.04	0.0469	0.0469	0.0477	0.0477	0.042	0.0479	0.0484	0.0462	0.0462
375190	2	5	0.097	0.403	0.377	0.405	0.404	0.115	0.42	0.361	0.372	0.354	0.252	0.366
653140	2	3	0.195	0.119	0.09	0.124	0.124	0.122	0.0961	0.077	0.0999	0.105	0.155	0.121
50618	2	20	0.102	0.0541	0.159	0.0473	0.055	0.159	0.082	0.209	0.0572	0.165	0.103	0.0505
8648	2	15	0.00734	0.0237	0.0044	0.0264	0.0268	0.00743	0.0306	0.0044	0.0242	0.0042	0.0083	0.0292
79172	2	6	0.0156	0.0331	0.0022	0.0327	0.033	0.0166	0.0387	0.0032	0.0173	0.0017	0.0066	0.0183
109	2	11	0.197	0.0183	0.078	0.0204	0.0177	0.271	0.0276	0.099	0.0218	0.0753	0.0257	0.0225
51277	2	2	0.127	0.047	0.054	0.0461	0.0473	0.223	0.0902	0.091	0.0478	0.0512	0.0521	0.0413
22979	2	9	0.0897	0.0108	0.039	0.0268	0.0126	0.0791	0.00909	0.02	0.0171	0.036	0.02	0.0365
5443	2	4	0.0593	0.017	0.018	0.0175	0.017	0.0602	0.0168	0.012	0.0149	0.0145	0.0142	0.0156
1788	2	8	0.265	0.113	0.054	0.284	0.121	0.298	0.138	0.077	0.0899	0.0618	0.135	0.212
1838	2	24	0.0538	0.259	0.262	0.291	0.256	0.146	0.272	0.266	0.223	0.27	0.253	0.22
55252	2	14	0.446	0.363	0.191	0.439	0.361	0.205	0.202	0.136	0.278	0.174	0.11	0.359
3797	2	5	0.084	0.0239	0.036	0.0196	0.0248	0.0714	0.0255	0.04	0.0271	0.047	0.0179	0.0201
10890	2	7	0.939	0.492	0.555	0.483	0.492	0.887	0.318	0.36	0.484	0.529	0.522	0.472
3030	2	5	0.351	0.601	0.666	0.627	0.603	0.372	0.787	0.866	0.618	0.677	0.686	0.653
165082	2	8	0.569	0.408	0.408	0.408	0.409	0.643	0.361	0.325	0.358	0.424	0.346	0.357
85465	2	5	0.164	0.176	0.107	0.181	0.183	0.178	0.178	0.211	0.201	0.125	0.122	0.177
92749	2	4	0.12	0.599	0.673	0.444	0.597	0.086	0.613	0.593	0.604	0.671	0.54	0.489
9381	2	18	0.971	0.824	0.899	0.812	0.815	0.985	0.855	0.989	0.836	0.89	0.869	0.85
339778	2	4	0.613	0.799	0.639	0.936	0.804	0.792	0.898	0.676	0.771	0.637	0.753	0.943
130106	2	12	0.334	0.586	0.507	0.578	0.588	0.434	0.643	0.541	0.581	0.487	0.613	0.569
3777	2	5	0.467	0.897	0.895	0.948	0.896	0.438	0.872	0.844	0.898	0.88	0.812	0.933
1058	2	2	0.0291	0.0332	0.026	0.0316	0.0316	0.0359	0.0404	0.035	0.0301	0.0263	0.0286	0.0271
56896	2	8	0.851	0.191	0.261	0.21	0.19	0.714	0.171	0.187	0.177	0.237	0.184	0.195
22924	2	5	0.14	0.512	0.416	0.492	0.508	0.124	0.504	0.412	0.51	0.432	0.427	0.463
60509	2	1	0.295	0.295	0.292	0.296	0.296	0.365	0.365	0.357	0.32	0.32	0.326	0.307
3795	2	1	0.76	0.76	0.757	0.758	0.758	0.71	0.71	0.716	0.773	0.773	0.76	0.78
84696	2	1	0.767	0.767	0.767	0.767	0.767	0.85	0.85	0.854	0.783	0.783	0.778	0.761
10113	2	1	0.983	0.983	0.987	0.983	0.983	0.97	0.97	0.966	1	1	1	0.988
8884	2	3	0.692	0.519	0.502	0.522	0.523	0.579	0.566	0.547	0.5	0.473	0.483	0.518
51374	2	1	0.899	0.899	0.914	0.899	0.899	0.727	0.727	0.739	0.918	0.918	0.92	0.891
790	2	5	0.634	0.349	0.421	0.381	0.348	0.528	0.394	0.442	0.325	0.399	0.396	0.371
7781	2	1	0.525	0.525	0.525	0.533	0.533	0.556	0.556	0.563	0.515	0.515	0.534	0.539
57159	2	2	0.68	0.681	0.677	0.686	0.686	0.774	0.775	0.745	0.687	0.687	0.669	0.693
4358	2	1	0.749	0.749	0.743	0.753	0.753	0.857	0.857	0.837	0.763	0.763	0.743	0.766
2976	2	1	0.0116	0.0116	0.015	0.0111	0.0111	0.0206	0.0206	0.011	0.012	0.0119	0.0116	0.0113
26160	2	1	0.495	0.495	0.519	0.495	0.495	0.445	0.445	0.424	0.514	0.514	0.533	0.492
2646	2	4	5.98e-05	0.000134	0.00013	0.00168	0.000127	0.000247	0.000446	0.00046	0.000172	0.00014	2.6e-05	0.00207
84450	2	4	0.0661	0.0463	0.027	0.0468	0.0451	0.162	0.0995	0.082	0.0474	0.0263	0.0345	0.0458
11321	2	3	0.394	0.496	0.413	0.485	0.485	0.512	0.721	0.674	0.455	0.419	0.427	0.45
9913	2	1	0.527	0.527	0.499	0.521	0.521	0.519	0.519	0.525	0.547	0.547	0.528	0.505
9553	2	3	0.0936	0.026	0.025	0.0505	0.0287	0.106	0.0302	0.033	0.0247	0.0318	0.0312	0.05
64080	2	5	0.128	0.0264	0.026	0.023	0.0266	0.152	0.0488	0.045	0.0254	0.0228	0.0247	0.0202
9577	2	40	0.31	0.0105	0.047	0.0183	0.0115	0.404	0.0159	0.085	0.0193	0.0453	0.0222	0.0256
2355	2	1	0.422	0.422	0.421		0.422	0.575	0.575	0.568	0.462	0.462	0.473
151056	2	32	0.135	0.295	0.205	0.322	0.3	0.0711	0.223	0.104	0.313	0.255	0.312	0.318
5500	2	4	0.152	0.255	0.216	0.248	0.258	0.162	0.364	0.3	0.211	0.209	0.276	0.22
245711	2	5	0.328	0.499	0.415	0.496	0.501	0.471	0.647	0.538	0.444	0.415	0.347	0.468
23160	2	7	0.617	0.775	0.88	0.763	0.771	0.717	0.797	0.884	0.839	0.884	0.798	0.791
165186	2	14	0.838	0.752	0.746	0.822	0.761	0.869	0.78	0.709	0.636	0.723	0.534	0.763
388939	2	2	0.958	0.86	0.928	0.845	0.849	0.86	0.689	0.725	0.919	0.929	0.923	0.899
79745	2	9	0.925	0.734	0.804	0.67	0.736	0.952	0.765	0.795	0.709	0.781	0.754	0.683
238	2	151	0.0746	0.129	0.168	0.187	0.135	0.257	0.311	0.333	0.12	0.172	0.166	0.122
51646	2	2	0.32	0.676	0.662	0.673	0.673	0.338	0.851	0.824	0.708	0.708	0.659	0.676
81606	2	3	0.351	0.206	0.196	0.206	0.206	0.34	0.234	0.219	0.207	0.206	0.207	0.209
253558	2	50	0.395	0.234	0.096	0.297	0.243	0.308	0.253	0.124	0.222	0.102	0.0324	0.271
92291	2	42	0.367	0.0349	0.206	0.0236	0.0357	0.408	0.0285	0.251	0.0446	0.191	0.088	0.0285
79623	2	51	0.166	0.223	0.375	0.229	0.217	0.144	0.24	0.47	0.193	0.396	0.37	0.23
440854	2	19	0.546	0.832	0.927	0.753	0.831	0.538	0.856	0.966	0.886	0.93	0.894	0.798
30845	2	4	0.39	0.624	0.58	0.78	0.619	0.547	0.869	0.916	0.627	0.566	0.569	0.772
7498	2	14	0.355	0.778	0.682	0.852	0.773	0.217	0.638	0.619	0.735	0.687	0.674	0.844
6716	2	6	0.883	0.679	0.674	0.652	0.676	0.844	0.604	0.651	0.701	0.676	0.761	0.66
51072	2	3	0.857	0.647	0.724	0.486	0.642	0.905	0.765	0.772	0.693	0.747	0.719	0.494
6683	2	5	0.142	0.53	0.376	0.706	0.524	0.213	0.53	0.388	0.536	0.409	0.387	0.71
55676	2	5	0.46	0.378	0.416	0.372	0.371	0.429	0.323	0.409	0.398	0.436	0.428	0.355
58484	2	4	0.821	0.567	0.565	0.568	0.56	0.558	0.408	0.357	0.594	0.599	0.603	0.582
84272	2	1	0.431	0.431	0.411	0.427	0.427	0.495	0.495	0.502	0.439	0.439	0.425	0.424
57448	2	10	0.228	0.646	0.194	0.649	0.643	0.33	0.743	0.333	0.573	0.197	0.416	0.565
55622	2	25	0.11	0.00261	0.028	0.00277	0.00253	0.0827	0.00148	0.015	0.0047	0.0211	0.0068	0.00419
4052	2	86	0.169	0.499	0.726	0.572	0.538	0.0712	0.508	0.653	0.494	0.721	0.349	0.587
25780	2	30	0.231	0.0626	0.059	0.0441	0.0666	0.224	0.0509	0.099	0.0738	0.0586	0.135	0.0536
25940	2	3	0.956	0.895	0.914	0.891	0.895	0.984	0.988	0.982	0.896	0.913	0.894	0.909
51232	2	61	0.61	0.352	0.446	0.347	0.349	0.532	0.248	0.238	0.304	0.406	0.23	0.295
9637	2	15	0.292	0.491	0.459	0.465	0.483	0.32	0.508	0.489	0.456	0.506	0.537	0.431
5212	2	36	0.264	0.711	0.637	0.705	0.713	0.195	0.712	0.601	0.723	0.637	0.662	0.69
6801	2	10	0.485	0.518	0.711	0.524	0.504	0.386	0.312	0.501	0.531	0.718	0.475	0.578
54497	2	10	0.343	0.519	0.273	0.463	0.516	0.612	0.557	0.491	0.503	0.267	0.462	0.408
253635	2	1	0.762	0.762	0.775	0.761	0.761	0.63	0.63	0.642	0.79	0.79	0.813	0.775
5610	2	3	0.461	0.192	0.242	0.187	0.187	0.621	0.319	0.341	0.189	0.235	0.304	0.184
391365	2	5	0.781	0.406	0.433	0.291	0.405	0.665	0.352	0.311	0.367	0.43	0.399	0.287
55471	2	3	0.618	0.722	0.717	0.73	0.726	0.591	0.658	0.544	0.72	0.714	0.687	0.748
23683	2	18	0.176	0.296	0.34	0.307	0.3	0.131	0.334	0.294	0.339	0.341	0.376	0.287
25797	2	1	0.595	0.595	0.597	0.597	0.597	0.777	0.777	0.794	0.619	0.619	0.562	0.609
10602	2	7	0.754	0.338	0.524	0.328	0.337	0.855	0.583	0.791	0.342	0.564	0.438	0.309
151393	2	19	0.29	0.384	0.213	0.447	0.381	0.303	0.404	0.221	0.348	0.196	0.267	0.422
1545	2	1	0.697	0.697	0.706	0.699	0.699	0.584	0.584	0.588	0.716	0.716	0.705	0.707
64225	2	4	0.962	0.941	0.947	0.927	0.949	0.862	0.956	0.994	0.967	0.94	0.958	0.958
92906	2	6	0.383	0.158	0.231	0.189	0.154	0.566	0.211	0.31	0.137	0.235	0.345	0.164
130589	2	10	0.447	0.449	0.466	0.376	0.45	0.282	0.328	0.368	0.402	0.435	0.43	0.391
79833	2	1	0.192	0.192	0.184	0.184	0.184	0.174	0.174	0.15	0.19	0.19	0.188	0.169
90957	2	6	0.842	0.341	0.417	0.353	0.333	0.722	0.272	0.331	0.326	0.431	0.341	0.324
100271715	2	7	0.18	0.579	0.244	0.593	0.585	0.361	0.657	0.416	0.517	0.261	0.265	0.514
6654	2	11	0.763	0.511	0.489	0.5	0.514	0.872	0.587	0.578	0.469	0.502	0.341	0.463
344387	2	6	0.657	0.299	0.438	0.263	0.299	0.641	0.267	0.447	0.297	0.451	0.389	0.262
8491	2	23	0.638	0.481	0.758	0.486	0.482	0.611	0.407	0.749	0.493	0.765	0.581	0.501
130733	2	5	0.187	0.159	0.128	0.143	0.157	0.144	0.126	0.105	0.147	0.12	0.185	0.144
80745	2	2	0.0166	0.221	0.097	0.221	0.22	0.0166	0.193	0.094	0.159	0.102	0.11	0.213
6546	2	112	0.575	0.0398	0.196	0.0285	0.0453	0.583	0.056	0.186	0.0484	0.223	0.0553	0.0324
91461	2	1	0.337	0.337	0.354	0.335	0.335	0.314	0.314	0.314	0.356	0.356	0.376	0.366
27436	2	18	0.49	0.364	0.337	0.378	0.36	0.504	0.284	0.308	0.335	0.357	0.24	0.346
170850	2	5	0.23	0.0842	0.045	0.0834	0.0841	0.233	0.065	0.064	0.0709	0.0565	0.167	0.0677
57504	2	7	0.279	0.73	0.625	0.735	0.721	0.17	0.693	0.563	0.671	0.579	0.576	0.716
165140	2	1	0.766	0.766	0.793		0.767	0.79	0.79	0.776	0.788	0.788	0.78
23498	2	4	0.744	0.624	0.656	0.607	0.625	0.732	0.623	0.634	0.639	0.653	0.627	0.6
63892	2	60	0.0161	0.0549	0.102	0.042	0.0463	0.0241	0.021	0.042	0.0571	0.0979	0.0578	0.0457
130271	2	29	0.145	0.00851	0.055	0.00899	0.0093	0.0931	0.0202	0.065	0.0125	0.0672	0.102	0.0107
51626	2	3	0.00474	0.00182	0.0015	0.0019	0.00209	0.0131	0.00366	0.0042	0.0018	0.0015	0.0044	0.00158
64240	2	5	0.00483	0.058	0.0064	0.0573	0.0634	0.0109	0.0776	0.017	0.0414	0.005	0.0421	0.0439
64241	2	5	0.798	0.63	0.795	0.496	0.616	0.704	0.495	0.603	0.656	0.776	0.736	0.494
10128	2	15	0.6	0.353	0.604	0.292	0.343	0.552	0.357	0.546	0.324	0.562	0.655	0.269
5495	2	5	0.92	0.658	0.748	0.713	0.66	0.955	0.688	0.793	0.671	0.754	0.782	0.731
6519	2	9	0.0018	0.317	0.331	0.372	0.32	0.00755	0.37	0.433	0.28	0.316	0.443	0.361
9581	2	11	0.0192	0.335	0.365	0.301	0.338	0.0236	0.38	0.394	0.307	0.345	0.417	0.266
79823	2	66	0.163	0.384	0.457	0.548	0.376	0.237	0.37	0.563	0.298	0.437	0.286	0.364
10736	2	2	0.0668	0.0636	0.047	0.0627	0.0627	0.0662	0.0752	0.04	0.0623	0.0478	0.056	0.0574
55133	2	35	0.782	0.171	0.21	0.155	0.169	0.623	0.0639	0.119	0.168	0.203	0.339	0.142
5581	2	140	0.517	0.216	0.595	0.247	0.227	0.558	0.129	0.513	0.224	0.599	0.394	0.261
2034	2	21	0.648	0.672	0.705	0.722	0.66	0.748	0.712	0.651	0.714	0.746	0.701	0.786
90423	2	1	0.408	0.408	0.403	0.402	0.402	0.358	0.358	0.365	0.423	0.423	0.393	0.393
23433	2	2	0.344	0.385	0.27	0.396	0.396	0.4	0.483	0.296	0.334	0.264	0.342	0.367
5281	2	5	0.249	0.149	0.175	0.157	0.153	0.194	0.12	0.094	0.154	0.182	0.22	0.154
9419	2	1	0.0503	0.0503	0.053	0.0499	0.0499	0.0322	0.0322	0.031	0.0558	0.0567	0.0516	0.0494
9655	2	11	0.532	0.756	0.088	0.941	0.75	0.615	0.786	0.072	0.584	0.0912	0.39	0.958
90411	2	3	0.82	0.596	0.64	0.601	0.605	0.765	0.527	0.598	0.613	0.67	0.693	0.594
57217	2	25	0.699	0.649	0.885	0.653	0.65	0.638	0.655	0.803	0.7	0.897	0.669	0.686
285051	2	17	0.317	0.282	0.365	0.365	0.29	0.363	0.315	0.467	0.256	0.329	0.463	0.32
805	2	2	0.679	0.577	0.684	0.537	0.578	0.519	0.409	0.512	0.617	0.679	0.584	0.56
4436	2	5	0.373	0.511	0.421	0.508	0.517	0.251	0.432	0.316	0.469	0.406	0.37	0.476
56660	2	6	0.195	0.168	0.362	0.174	0.173	0.143	0.1	0.285	0.159	0.342	0.155	0.187
2956	2	3	0.883	0.853	0.884	0.86	0.857	0.87	0.694	0.732	0.879	0.879	0.908	0.891
80204	2	7	0.636	0.393	0.413	0.384	0.385	0.615	0.508	0.496	0.388	0.406	0.445	0.352
3344	2	10	0.899	0.878	0.878	0.884	0.877	0.916	0.89	0.942	0.886	0.877	0.951	0.87
129285	2	4	0.355	0.221	0.2	0.216	0.216	0.554	0.332	0.406	0.185	0.193	0.206	0.194
286749	2	46	0.622	0.841	0.691	0.848	0.841	0.723	0.906	0.761	0.779	0.665	0.967	0.788
11037	2	13	0.163	0.862	0.905	0.878	0.866	0.259	0.882	0.907	0.879	0.916	0.86	0.897
11036	2	9	0.659	0.708	0.416	0.614	0.699	0.78	0.852	0.666	0.629	0.426	0.751	0.551
3973	2	14	0.854	0.831	0.601	0.796	0.837	0.92	0.861	0.655	0.814	0.601	0.858	0.76
2492	2	57	0.696	0.184	0.363	0.176	0.188	0.792	0.207	0.513	0.209	0.387	0.191	0.193
9378	2	228	0.222	0.463	0.465	0.465	0.441	0.223	0.495	0.395	0.412	0.476	0.325	0.363
51130	2	17	0.609	0.342	0.379	0.308	0.341	0.6	0.451	0.443	0.326	0.364	0.267	0.317
100302652	2	25	0.603	0.307	0.217	0.303	0.304	0.523	0.394	0.266	0.281	0.212	0.14	0.301
27248	2	2	0.392	0.308	0.419	0.365	0.314	0.42	0.332	0.491	0.32	0.411	0.334	0.341
23198	2	15	0.489	0.329	0.29	0.294	0.327	0.562	0.39	0.381	0.315	0.311	0.326	0.265
98	2	29	0.762	0.596	0.872	0.468	0.588	0.68	0.582	0.916	0.578	0.893	0.711	0.476
388951	2	2	0.465	0.272	0.284	0.272	0.272	0.58	0.324	0.369	0.265	0.281	0.274	0.27
129852	2	3	0.58	0.479	0.413	0.476	0.479	0.556	0.408	0.365	0.45	0.391	0.46	0.452
6711	2	52	0.389	0.698	0.318	0.674	0.692	0.528	0.848	0.638	0.676	0.337	0.477	0.662
400954	2	65	0.785	0.98	0.955	0.966	0.979	0.598	0.976	0.937	0.99	0.956	0.984	0.985
57142	2	15	0.133	0.174	0.18	0.252	0.18	0.142	0.216	0.268	0.157	0.236	0.0847	0.22
130162	2	4	0.833	0.868	0.934	0.891	0.878	0.855	0.888	0.92	0.907	0.931	0.904	0.921
6233	2	1	0.296	0.296	0.304	0.291	0.291	0.397	0.397	0.382	0.309	0.309	0.278	0.282
4528	2	3	0.424	0.652	0.648	0.814	0.652	0.477	0.668	0.676	0.668	0.633	0.645	0.809
55704	2	21	0.64	0.687	0.746	0.761	0.683	0.838	0.773	0.834	0.687	0.738	0.71	0.775
112942	2	4	0.696	0.777	0.832	0.671	0.774	0.806	0.742	0.867	0.777	0.833	0.787	0.678
57223	2	8	0.289	0.55	0.695	0.57	0.542	0.44	0.682	0.819	0.561	0.677	0.564	0.555
87178	2	13	0.62	0.789	0.884	0.788	0.786	0.679	0.908	0.949	0.816	0.895	0.804	0.827
2202	2	13	0.0258	0.597	0.718	0.609	0.591	0.0293	0.55	0.65	0.592	0.741	0.706	0.552
114800	2	36	0.18	0.475	0.365	0.43	0.472	0.0866	0.363	0.254	0.402	0.389	0.287	0.39
7444	2	6	0.0178	0.0148	0.0024	0.0951	0.0159	0.00718	0.00566	0.00062	0.0139	0.0033	0.0046	0.0905
55120	2	11	0.0673	0.0459	0.0052	0.0111	0.0513	0.0395	0.0183	0.0024	0.0377	0.0044	0.0327	0.0132
53335	2	17	0.374	0.499	0.803	0.502	0.494	0.564	0.661	0.935	0.529	0.798	0.615	0.528
64895	2	4	0.0642	0.107	0.15	0.107	0.104	0.162	0.148	0.19	0.126	0.157	0.154	0.13
150962	2	6	0.022	0.0255	0.007	0.0284	0.026	0.0612	0.109	0.035	0.0256	0.0057	0.0097	0.0291
5194	2	3	0.26	0.191	0.201	0.194	0.196	0.477	0.422	0.373	0.187	0.182	0.15	0.197
84542	2	4	0.197	0.61	0.392	0.561	0.613	0.264	0.82	0.651	0.549	0.403	0.474	0.484
339804	2	4	0.0645	0.00765	0.019	0.00965	0.00753	0.0818	0.0161	0.021	0.007	0.0118	0.0206	0.0107
130872	2	3	0.033	0.0479	0.042	0.125	0.0454	0.038	0.0358	0.033	0.0442	0.0407	0.0611	0.116
9736	2	23	0.0334	0.0379	0.063	0.0347	0.0394	0.0297	0.0455	0.05	0.0388	0.0543	0.0437	0.038
7514	2	3	0.101	0.205	0.06	0.568	0.205	0.0808	0.204	0.048	0.193	0.0658	0.0868	0.559
84140	2	5	0.288	0.731	0.559	0.674	0.732	0.216	0.725	0.545	0.732	0.596	0.57	0.653
10575	2	1	0.84	0.84	0.836	0.84	0.84	0.803	0.803	0.791	0.875	0.875	0.84	0.817
150684	2	14	0.113	0.785	0.598	0.746	0.772	0.105	0.783	0.625	0.759	0.597	0.799	0.721
10678	2	2	0.455	0.488	0.519	0.309	0.482	0.437	0.471	0.515	0.516	0.534	0.521	0.326
200728	2	1	0.628	0.628	0.598	0.633	0.633	0.483	0.483	0.477	0.64	0.64	0.616	0.636
23301	2	16	0.134	0.487	0.67	0.481	0.483	0.207	0.4	0.719	0.487	0.688	0.423	0.467
51057	2	37	0.825	0.582	0.853	0.583	0.587	0.793	0.6	0.687	0.612	0.86	0.688	0.58
7360	2	6	0.215	0.213	0.345	0.203	0.216	0.182	0.169	0.297	0.204	0.3	0.252	0.195
51542	2	10	0.488	0.737	0.586	0.722	0.728	0.471	0.706	0.757	0.705	0.561	0.626	0.698
57162	2	4	0.794	0.716	0.624	0.714	0.721	0.62	0.458	0.389	0.716	0.618	0.673	0.717
29094	2	1	0.795	0.795	0.772	0.794	0.794	0.832	0.832	0.828	0.793	0.793	0.787	0.779
54812	2	5	0.21	0.38	0.349	0.36	0.426	0.242	0.477	0.448	0.353	0.368	0.363	0.359
9792	2	2	0.934	0.932	0.94	0.929	0.929	0.631	0.653	0.585	0.948	0.963	0.948	0.939
6509	2	4	0.439	0.175	0.335	0.174	0.173	0.555	0.35	0.355	0.186	0.33	0.196	0.195
23177	2	5	0.55	0.065	0.15	0.069	0.0657	0.479	0.0633	0.148	0.0663	0.151	0.13	0.0683
5861	2	3	0.186	0.0829	0.076	0.0877	0.0844	0.195	0.0686	0.086	0.0725	0.0822	0.121	0.0766
10097	2	3	0.182	0.492	0.469	0.495	0.498	0.313	0.563	0.535	0.451	0.498	0.483	0.423
200734	2	20	0.00192	0.0326	0.038	0.0347	0.0328	0.00397	0.0295	0.086	0.0362	0.0491	0.0044	0.0399
4211	2	19	0.647	0.753	0.845	0.736	0.753	0.792	0.847	0.75	0.711	0.829	0.656	0.714
54465	2	3	0.0453	0.022	0.027	0.0225	0.0219	0.034	0.0151	0.013	0.0196	0.0245	0.0343	0.0207
10438	2	1	0.71	0.71	0.721		0.712	0.603	0.603	0.607	0.739	0.739	0.728
116143	2	1	0.894	0.894	0.892		0.894	0.847	0.847	0.843	0.92	0.92	0.901
56902	2	2	0.848	0.871	0.926	0.873	0.877	0.915	0.922	0.957	0.898	0.913	0.919	0.903
5534	2	8	0.293	0.804	0.878	0.807	0.802	0.232	0.868	0.935	0.828	0.872	0.843	0.839
25927	2	7	0.718	0.696	0.722	0.683	0.696	0.873	0.884	0.954	0.712	0.719	0.653	0.698
5341	2	17	0.23	0.428	0.543	0.453	0.425	0.167	0.413	0.602	0.433	0.546	0.531	0.432
200558	2	9	0.17	0.246	0.044	0.21	0.253	0.155	0.211	0.05	0.2	0.0629	0.0363	0.168
9938	2	21	0.076	0.159	0.194	0.184	0.163	0.0646	0.192	0.211	0.163	0.179	0.151	0.187
27302	2	2	0.0432	0.0139	0.021	0.0121	0.0138	0.0557	0.0182	0.024	0.0126	0.0235	0.0214	0.0116
56287	2	3	0.194	0.197	0.311	0.194	0.197	0.237	0.282	0.387	0.211	0.327	0.238	0.199
84168	2	37	0.478	0.552	0.668	0.479	0.556	0.544	0.442	0.511	0.533	0.697	0.566	0.484
2673	2	9	0.181	0.0576	0.072	0.0569	0.0587	0.0942	0.0251	0.028	0.0554	0.0742	0.0371	0.054
27247	2	2	0.0806	0.0277	0.053	0.0294	0.0277	0.0334	0.0101	0.018	0.0298	0.0598	0.0268	0.0287
22848	2	15	0.548	0.41	0.315	0.449	0.412	0.39	0.144	0.136	0.383	0.354	0.349	0.45
307	2	10	0.937	0.488	0.492	0.496	0.489	0.808	0.476	0.276	0.457	0.492	0.383	0.468
64395	2	3	0.322	0.26	0.24	0.259	0.259	0.177	0.133	0.133	0.268	0.269	0.245	0.233
4084	2	4	0.141	0.411	0.414	0.495	0.409	0.105	0.407	0.403	0.359	0.387	0.457	0.451
151516	2	1	0.731	0.731	0.726	0.732	0.732	0.781	0.781	0.79	0.743	0.743	0.755	0.731
54980	2	1	0.464	0.464	0.456	0.465	0.465	0.46	0.46	0.451	0.467	0.467	0.47	0.467
7072	2	3	0.346	0.257	0.368	0.229	0.256	0.47	0.338	0.534	0.271	0.365	0.239	0.245
51449	2	5	0.399	0.309	0.416	0.306	0.306	0.488	0.384	0.573	0.323	0.406	0.302	0.293
6637	2	2	0.142	0.321	0.307	0.319	0.319	0.149	0.349	0.326	0.305	0.29	0.274	0.315
84908	2	2	0.194	0.112	0.218	0.111	0.113	0.275	0.17	0.334	0.124	0.214	0.115	0.109
7039	2	20	0.131	0.694	0.211	0.849	0.695	0.253	0.744	0.341	0.615	0.22	0.498	0.823
119	2	31	0.0869	0.918	0.904	0.916	0.918	0.151	0.925	0.883	0.941	0.934	0.926	0.919
344018	2	2	0.381	0.177	0.157	0.178	0.178	0.418	0.199	0.212	0.173	0.183	0.179	0.182
165530	2	2	0.158	0.189	0.12	0.191	0.19	0.117	0.152	0.074	0.15	0.107	0.132	0.151
50489	2	4	0.287	0.737	0.76	0.576	0.738	0.176	0.672	0.692	0.693	0.706	0.704	0.593
25806	2	4	0.624	0.587	0.499	0.584	0.588	0.634	0.69	0.603	0.609	0.49	0.603	0.582
525	2	2	0.563	0.502	0.654	0.474	0.507	0.578	0.524	0.606	0.528	0.655	0.548	0.466
55577	2	4	0.794	0.758	0.788	0.799	0.754	0.552	0.607	0.476	0.772	0.788	0.789	0.805
10199	2	7	0.542	0.836	0.969	0.833	0.839	0.625	0.857	0.93	0.905	0.968	0.915	0.887
400961	2	6	0.405	0.278	0.217	0.287	0.286	0.22	0.128	0.127	0.251	0.233	0.23	0.238
27332	2	16	0.341	0.499	0.386	0.75	0.51	0.228	0.247	0.209	0.443	0.412	0.587	0.698
8291	2	30	0.515	0.5	0.56	0.568	0.496	0.512	0.647	0.646	0.454	0.541	0.559	0.516
56603	2	1	0.368	0.368	0.364	0.37	0.37	0.464	0.464	0.456	0.365	0.365	0.376	0.379
23233	2	40	0.426	0.0828	0.021	0.0688	0.0854	0.3	0.223	0.028	0.106	0.0246	0.0627	0.0764
2016	2	1	0.925	0.925	0.928	0.925	0.925	0.953	0.953	0.951	0.935	0.935	0.93	0.913
94097	2	7	0.388	0.691	0.851	0.679	0.69	0.328	0.783	0.837	0.764	0.869	0.709	0.723
26056	2	4	0.297	0.392	0.421	0.386	0.389	0.22	0.336	0.265	0.377	0.42	0.417	0.38
344022	2	1	0.554	0.554	0.547	0.551	0.551	0.699	0.699	0.716	0.557	0.557	0.551	0.516
10322	2	2	0.805	0.809	0.828	0.58	0.81	0.679	0.698	0.703	0.825	0.828	0.822	0.58
10574	2	2	0.482	0.274	0.366	0.28	0.28	0.446	0.248	0.339	0.266	0.378	0.283	0.281
7840	2	15	0.551	0.155	0.402	0.161	0.153	0.587	0.136	0.305	0.146	0.345	0.387	0.158
10617	2	3	0.763	0.858	0.667	0.311	0.851	0.802	0.851	0.686	0.802	0.663	0.793	0.327
72	2	6	0.964	0.877	0.9	0.902	0.877	0.948	0.95	0.959	0.911	0.889	0.924	0.916
1716	2	2	0.052	0.0408	0.023	0.0399	0.0424	0.0318	0.0231	0.015	0.0407	0.0306	0.0423	0.0386
200424	2	9	0.421	0.851	0.799	0.833	0.848	0.45	0.829	0.827	0.856	0.816	0.772	0.858
388962	2	5	0.475	0.131	0.231	0.131	0.13	0.482	0.125	0.228	0.134	0.24	0.117	0.144
10797	2	1	0.0308	0.0308	0.025	0.0308	0.0308	0.0277	0.0277	0.025	0.0321	0.0337	0.0362	0.0316
57835	2	12	0.00833	0.0122	0.035	0.012	0.013	0.018	0.0136	0.041	0.0155	0.0328	0.0326	0.015
1639	2	6	0.0913	0.00795	0.027	0.0099	0.00908	0.0888	0.0117	0.025	0.0082	0.0198	0.0175	0.0107
7841	2	1	0.000415	0.000415	0.00032	0.000436	0.000436	0.000435	0.000435	0.00048	0.000413	0.000414	0.000457	0.000438
165545	2	1	0.000264	0.000264	0.00026	0.000275	0.000275	0.000253	0.000253	0.00026	0.000277	0.000278	0.000303	0.000288
84695	2	1	0.0103	0.0103	0.0092	0.0102	0.0102	0.00577	0.00577	0.0064	0.0106	0.0091	0.0115	0.0106
1796	2	1	0.0103	0.0103	0.0112	0.0102	0.0102	0.00577	0.00577	0.0068	0.0106	0.0091	0.0115	0.0102
130951	2	3	0.00342	0.000918	0.0005	0.000469	0.000676	0.00372	0.00123	0.00078	0.0013	0.000789	0.0037	0.000281
10505	2	2	0.00176	0.000668	0.00072	0.000362	0.000659	0.00151	0.00079	0.0006	0.000382	0.000576	0.00056	0.000401
3099	2	20	0.623	0.659	0.229	0.765	0.655	0.577	0.646	0.268	0.613	0.293	0.664	0.747
56655	2	3	0.982	0.948	0.96	0.95	0.95	0.979	0.972	0.989	0.966	0.959	0.964	0.961
6869	2	27	0.149	0.158	0.28	0.165	0.161	0.147	0.202	0.212	0.158	0.249	0.251	0.203
84141	2	15	0.35	0.261	0.449	0.208	0.261	0.234	0.217	0.307	0.259	0.455	0.473	0.182
9801	2	5	0.374	0.174	0.179	0.156	0.174	0.267	0.0915	0.052	0.172	0.18	0.226	0.142
6936	2	6	0.518	0.223	0.251	0.329	0.221	0.327	0.123	0.077	0.236	0.258	0.288	0.361
80059	2	106	0.0287	0.696	0.857	0.727	0.692	0.0357	0.771	0.947	0.713	0.858	0.798	0.743
130120	2	1	0.383	0.383	0.381	0.387	0.387	0.315	0.315	0.321	0.374	0.374	0.401	0.365
5968	2	1	0.907	0.907	0.911	0.907	0.907	0.693	0.693	0.681	0.917	0.917	0.924	0.916
5967	2	1	0.424	0.424	0.428	0.431	0.431	0.52	0.52	0.52	0.426	0.426	0.437	0.446
1496	2	230	0.855	0.0328	0.364	0.0557	0.0496	0.81	0.0179	0.278	0.0315	0.375	0.108	0.0427
8802	2	6	0.57	0.741	0.355	0.618	0.735	0.572	0.743	0.422	0.673	0.376	0.433	0.488
1768	2	43	0.379	0.708	0.97	0.688	0.708	0.327	0.766	0.947	0.752	0.974	0.934	0.708
129293	2	8	0.353	0.845	0.339	0.827	0.865	0.629	0.859	0.676	0.776	0.345	0.569	0.737
56888	2	4	0.961	0.895	0.94	0.799	0.866	0.944	0.811	0.839	0.917	0.934	0.931	0.839
83439	2	28	0.904	0.743	0.879	0.712	0.744	0.683	0.593	0.704	0.78	0.858	0.791	0.7
10618	2	2	0.998	0.994	1	0.995	0.995	0.864	0.609	0.686	1	1	1	1
84173	2	3	0.908	0.757	0.799	0.564	0.755	0.678	0.59	0.582	0.777	0.802	0.783	0.616
4144	2	2	0.432	0.439	0.403	0.436	0.439	0.338	0.381	0.299	0.439	0.401	0.421	0.353
10791	2	2	0.46	0.303	0.338	0.305	0.306	0.397	0.288	0.253	0.341	0.36	0.298	0.323
51255	2	1	0.696	0.696	0.684	0.698	0.698	0.686	0.686	0.684	0.723	0.723	0.697	0.684
10713	2	5	0.1	0.269	0.14	0.268	0.268	0.15	0.295	0.157	0.232	0.143	0.163	0.236
6439	2	2	0.598	0.537	0.592	0.541	0.542	0.651	0.606	0.604	0.566	0.582	0.567	0.546
10578	2	1	0.25	0.25	0.243	0.253	0.253	0.419	0.419	0.399	0.261	0.261	0.254	0.257
84913	2	7	0.178	0.279	0.143	0.282	0.279	0.245	0.373	0.18	0.243	0.13	0.186	0.247
8869	2	9	0.705	0.873	0.849	0.808	0.874	0.828	0.862	0.81	0.882	0.831	0.889	0.831
25885	2	12	0.651	0.8	0.911	0.736	0.794	0.606	0.771	0.92	0.805	0.888	0.877	0.753
55037	2	7	0.613	0.83	0.809	0.821	0.828	0.477	0.71	0.516	0.825	0.817	0.804	0.794
10989	2	15	0.947	0.934	0.91	0.942	0.933	0.928	0.877	0.965	0.948	0.905	0.931	0.976
51318	2	3	0.18	0.722	0.703	0.722	0.715	0.306	0.844	0.757	0.717	0.692	0.704	0.691
65055	2	31	0.343	0.623	0.794	0.643	0.617	0.326	0.503	0.691	0.638	0.791	0.753	0.669
55818	2	4	0.4	0.154	0.217	0.128	0.158	0.483	0.204	0.296	0.153	0.242	0.243	0.133
51652	2	4	0.187	0.0951	0.143	0.108	0.0946	0.359	0.123	0.223	0.0903	0.147	0.12	0.111
100526767	2	15	0.259	0.106	0.217	0.111	0.107	0.155	0.119	0.229	0.104	0.236	0.148	0.125
7844	2	4	0.555	0.219	0.284	0.222	0.22	0.495	0.27	0.354	0.237	0.312	0.305	0.222
64795	2	2	0.429	0.216	0.248	0.209	0.209	0.283	0.12	0.137	0.214	0.231	0.241	0.203
925	2	3	0.231	0.125	0.192	0.118	0.119	0.278	0.213	0.194	0.111	0.164	0.121	0.127
926	2	3	0.459	0.589	0.583	0.587	0.588	0.596	0.752	0.527	0.601	0.573	0.577	0.594
51315	2	1	0.67	0.67	0.672	0.668	0.668	0.989	0.989	0.992	0.711	0.711	0.68	0.64
150572	2	7	0.723	0.68	0.526	0.665	0.677	0.64	0.646	0.513	0.651	0.547	0.629	0.622
2168	2	3	0.879	0.767	0.793	0.766	0.761	0.715	0.533	0.582	0.793	0.798	0.777	0.798
55258	2	3	0.44	0.287	0.213	0.286	0.287	0.393	0.278	0.212	0.294	0.261	0.288	0.28
200523	2	1	0.979	0.979	0.985	0.979	0.979	0.59	0.59	0.604	1	1	1	0.983
9451	2	2	0.942	0.942	0.94	0.942	0.942	0.662	0.663	0.679	0.952	0.962	0.963	0.936
22934	2	8	0.964	0.825	0.947	0.733	0.816	0.966	0.839	0.972	0.88	0.952	0.927	0.781
50802	2	3	0.147	0.453	0.279		0.367	0.157	0.545	0.399	0.412	0.307	0.41
4118	2	1	0.17	0.17	0.151	0.168	0.168	0.297	0.297	0.282	0.188	0.188	0.174	0.162
7549	2	1	0.0846	0.0846	0.071	0.0851	0.0851	0.189	0.189	0.167	0.0868	0.0885	0.0874	0.085
30818	2	6	0.227	0.176	0.123	0.174	0.178	0.382	0.339	0.265	0.16	0.14	0.125	0.168
431705	2	1	0.0588	0.0588	0.056		0.057	0.0791	0.0791	0.07	0.0627	0.0627	0.0686
9391	2	1	0.861	0.861	0.868	0.863	0.863	0.979	0.979	0.981	0.871	0.871	0.881	0.877
23020	2	3	0.144	0.456	0.143	0.454	0.452	0.215	0.584	0.37	0.342	0.164	0.227	0.342
23397	2	2	0.787	0.757	0.765		0.75	0.755	0.572	0.617	0.768	0.759	0.763
10865	2	1	0.174	0.174	0.174		0.178	0.181	0.181	0.175	0.198	0.198	0.177
55683	2	1	0.268	0.268	0.269	0.27	0.27	0.462	0.462	0.457	0.293	0.293	0.274	0.26
90342	2	2	0.102	0.0407	0.104	0.0414	0.0378	0.221	0.106	0.207	0.044	0.113	0.0416	0.0422
26504	2	2	0.295	0.244	0.234	0.466	0.249	0.263	0.254	0.204	0.248	0.243	0.265	0.462
26505	2	2	0.154	0.119	0.097	0.146	0.122	0.137	0.1	0.09	0.121	0.117	0.105	0.169
51252	2	13	0.142	0.506	0.159	0.698	0.514	0.173	0.717	0.302	0.393	0.147	0.344	0.609
151313	2	3	0.141	0.0675	0.066	0.0564	0.0619	0.218	0.164	0.147	0.0664	0.061	0.0569	0.054
10120	2	1	0.766	0.766	0.773		0.766	0.558	0.558	0.558	0.775	0.775	0.773
7535	2	1	0.811	0.811	0.808	0.811	0.811	0.704	0.704	0.7	0.795	0.795	0.806	0.797
23505	2	17	0.428	0.494	0.554	0.432	0.496	0.598	0.582	0.816	0.456	0.537	0.523	0.384
200403	2	31	0.535	0.66	0.589	0.653	0.668	0.503	0.547	0.694	0.606	0.562	0.41	0.603
1261	2	7	0.355	0.359	0.545	0.364	0.365	0.338	0.386	0.601	0.368	0.55	0.338	0.373
3631	2	15	0.702	0.766	0.955	0.777	0.749	0.696	0.89	0.997	0.839	0.956	0.95	0.841
493753	2	2	0.743	0.744	0.766	0.741	0.741	0.881	0.881	0.882	0.761	0.763	0.739	0.739
25972	2	1	0.243	0.243	0.227	0.241	0.241	0.261	0.261	0.254	0.259	0.259	0.228	0.245
11320	2	10	0.703	0.769	0.534	0.666	0.767	0.845	0.894	0.813	0.718	0.527	0.614	0.645
343990	2	6	0.968	0.887	0.891	0.827	0.881	0.97	0.968	0.865	0.891	0.876	0.923	0.836
80705	2	11	0.563	0.79	0.727	0.806	0.799	0.487	0.907	0.974	0.814	0.738	0.788	0.802
51601	2	1	0.969	0.969	0.97		0.969	0.951	0.951	0.953	0.982	0.982	0.979
129531	2	1	0.873	0.873	0.862	0.873	0.873	0.98	0.98	0.982	0.868	0.868	0.886	0.87
51263	2	1	0.92	0.92	0.913	0.92	0.92	0.999	0.999	0.999	0.936	0.936	0.932	0.913
129530	2	1	0.255	0.255	0.268	0.256	0.256	0.397	0.397	0.408	0.282	0.282	0.272	0.24
9669	2	5	0.32	0.612	0.464	0.469	0.615	0.466	0.697	0.627	0.594	0.477	0.469	0.442
51455	2	11	0.865	0.605	0.635	0.589	0.604	0.882	0.678	0.78	0.608	0.656	0.594	0.59
3899	2	89	0.654	0.539	0.2	0.489	0.541	0.633	0.608	0.173	0.442	0.174	0.314	0.41
164832	2	11	0.0547	0.187	0.041	0.207	0.184	0.0315	0.21	0.017	0.164	0.0367	0.0398	0.161
9486	2	3	0.324	0.316	0.28	0.31	0.31	0.317	0.35	0.325	0.291	0.308	0.3	0.291
129521	2	9	0.175	0.326	0.273	0.318	0.317	0.136	0.355	0.276	0.302	0.242	0.232	0.308
79031	2	1	0.641	0.641	0.647	0.639	0.639	0.619	0.619	0.601	0.655	0.655	0.634	0.633
4862	2	38	0.849	0.773	0.161	0.793	0.766	0.896	0.844	0.335	0.647	0.174	0.57	0.67
6160	2	6	0.196	0.138	0.237	0.181	0.142	0.129	0.0855	0.147	0.0989	0.243	0.116	0.154
11138	2	22	0.566	0.27	0.321	0.259	0.274	0.467	0.254	0.317	0.24	0.348	0.327	0.243
284996	2	5	0.556	0.682	0.799	0.693	0.684	0.523	0.655	0.732	0.711	0.797	0.764	0.732
200407	2	8	0.0067	0.361	0.418	0.397	0.355	0.0216	0.359	0.38	0.333	0.408	0.245	0.356
731220	2	17	0.153	0.726	0.435	0.612	0.721	0.0977	0.554	0.218	0.701	0.416	0.399	0.546
9448	2	12	0.675	0.799	0.579	0.789	0.803	0.637	0.754	0.741	0.776	0.578	0.721	0.754
7850	2	11	0.055	0.00477	0.013	0.00469	0.00494	0.0437	0.00445	0.016	0.007	0.012	0.0116	0.0044
3554	2	7	0.191	0.392	0.577	0.393	0.393	0.156	0.35	0.538	0.399	0.596	0.425	0.358
8808	2	16	0.0995	0.501	0.663	0.559	0.502	0.0448	0.55	0.68	0.508	0.629	0.548	0.578
9173	2	11	0.00179	0.146	0.218	0.115	0.147	0.00395	0.134	0.141	0.13	0.225	0.196	0.106
8809	2	13	0.0594	0.0919	0.294	0.0904	0.0887	0.0896	0.136	0.274	0.0892	0.262	0.109	0.11
8807	2	9	0.068	0.004	0.016	0.00348	0.00418	0.0896	0.0074	0.013	0.0047	0.0087	0.0216	0.0038
389015	2	28	0.0398	0.02	0.013	0.0252	0.0217	0.0607	0.0283	0.042	0.0225	0.0208	0.0068	0.0277
6549	2	18	0.306	0.638	0.547	0.562	0.634	0.385	0.585	0.601	0.597	0.565	0.48	0.543
84804	2	3	0.578	0.561	0.314	0.552	0.552	0.708	0.571	0.461	0.502	0.324	0.415	0.518
130827	2	13	0.687	0.33	0.48	0.348	0.326	0.766	0.336	0.465	0.319	0.5	0.605	0.324
64965	2	3	0.869	0.905	0.885	0.906	0.903	0.821	0.855	0.816	0.928	0.906	0.916	0.919
9392	2	12	0.0323	0.0211	0.053	0.0127	0.0235	0.0199	0.0113	0.032	0.0242	0.0581	0.0197	0.0144
2274	2	14	0.128	0.0703	0.198	0.0671	0.0699	0.185	0.0942	0.148	0.0674	0.167	0.125	0.0702
8440	2	48	0.129	0.0585	0.069	0.0489	0.0557	0.137	0.0517	0.042	0.0528	0.0728	0.0449	0.0473
84417	2	1	0.568	0.568	0.554	0.568	0.568	0.586	0.586	0.586	0.557	0.557	0.59	0.561
80146	2	19	0.981	0.912	0.957	0.881	0.907	0.951	0.918	0.936	0.955	0.951	0.936	0.931
84620	2	25	0.081	0.0938	0.042	0.0845	0.0969	0.0668	0.0779	0.021	0.0851	0.0383	0.0282	0.0761
60482	2	7	0.932	0.793	0.696	0.779	0.788	0.855	0.69	0.472	0.774	0.696	0.799	0.798
442038	2	1	0.61	0.61	0.628	0.605	0.605	0.731	0.731	0.738	0.635	0.635	0.611	0.623
6819	2	1	0.88	0.88	0.903	0.88	0.88	0.834	0.834	0.823	0.917	0.917	0.91	0.886
9648	2	1	0.00169	0.00169	0.0024	0.00171	0.00171	0.00361	0.00361	0.003	0.0018	0.0024	0.0015	0.00178
3987	2	11	0.076	0.125	0.068	0.119	0.126	0.15	0.195	0.153	0.116	0.0666	0.0511	0.102
5903	2	2	0.0299	0.0489	0.047	0.0355	0.047	0.0329	0.0399	0.041	0.0444	0.0447	0.0399	0.0348
165055	2	2	0.0684	0.0294	0.015	0.0292	0.0292	0.0788	0.0285	0.016	0.0261	0.0269	0.0271	0.025
10913	2	12	0.44	0.108	0.168	0.151	0.106	0.366	0.0808	0.147	0.0979	0.156	0.239	0.154
7851	2	3	0.156	0.175	0.228	0.505	0.175	0.249	0.265	0.197	0.171	0.211	0.186	0.512
4867	2	3	0.481	0.294	0.357	0.287	0.288	0.547	0.315	0.297	0.32	0.403	0.378	0.312
699	2	2	0.134	0.14	0.128	0.139	0.139	0.225	0.23	0.232	0.154	0.154	0.13	0.145
55289	2	65	0.0672	0.131	0.073	0.159	0.13	0.152	0.109	0.093	0.111	0.0734	0.184	0.164
10018	2	2	0.575	0.365	0.414	0.37	0.37	0.727	0.503	0.603	0.345	0.434	0.423	0.339
64682	2	1	0.561	0.561	0.581	0.56	0.56	0.632	0.632	0.633	0.565	0.565	0.585	0.553
10461	2	23	0.5	0.0742	0.243	0.0733	0.0742	0.633	0.109	0.36	0.0748	0.225	0.17	0.0717
84910	2	6	0.624	0.715	0.338	0.671	0.718	0.791	0.826	0.469	0.633	0.338	0.529	0.529
129804	2	4	0.883	0.897	0.942	0.89	0.891	0.749	0.81	0.842	0.926	0.954	0.926	0.9
84524	2	3	0.912	0.942	0.967	0.936	0.944	0.968	0.992	0.99	0.96	0.973	0.965	0.938
376940	2	2	0.958	0.956	0.958	0.955	0.956	0.894	0.915	0.959	0.967	0.958	0.966	0.968
150465	2	3	0.429	0.648	0.759	0.641	0.65	0.302	0.404	0.48	0.672	0.753	0.65	0.71
84172	2	5	0.819	0.448	0.594	0.444	0.443	0.909	0.637	0.71	0.48	0.554	0.488	0.421
6574	2	1	0.661	0.661	0.657	0.66	0.66	0.869	0.869	0.858	0.661	0.661	0.673	0.631
150468	2	3	0.344	0.31	0.211	0.536	0.305	0.317	0.271	0.183	0.282	0.213	0.191	0.491
3552	2	2	0.708	0.954	0.955	0.953	0.953	0.743	0.873	0.868	0.963	0.965	0.957	0.952
27178	2	6	0.198	0.882	0.941	0.885	0.879	0.147	0.894	0.915	0.906	0.948	0.941	0.883
56300	2	2	0.355	0.463	0.322	0.462	0.461	0.436	0.452	0.349	0.396	0.317	0.392	0.393
27177	2	13	0.32	0.333	0.093	0.333	0.334	0.237	0.198	0.055	0.227	0.0882	0.0678	0.228
26525	2	8	0.000892	0.158	0.221	0.158	0.156	0.000225	0.0816	0.155	0.156	0.237	0.138	0.136
84639	2	5	0.0107	0.0478	0.029	0.0156	0.0493	0.0041	0.0143	0.015	0.0367	0.0308	0.0153	0.0131
3557	2	16	0.512	0.384	0.276	0.354	0.386	0.436	0.25	0.276	0.377	0.282	0.226	0.343
23550	2	6	0.662	0.34	0.295	0.337	0.337	0.733	0.402	0.39	0.344	0.337	0.251	0.318
7849	2	10	0.552	0.291	0.408	0.291	0.303	0.738	0.306	0.552	0.306	0.441	0.29	0.278
80255	2	5	0.213	0.529	0.295	0.523	0.523	0.407	0.633	0.349	0.446	0.297	0.299	0.412
10096	2	9	0.706	0.76	0.858	0.737	0.744	0.844	0.858	0.895	0.82	0.862	0.824	0.765
57628	2	168	0.0721	0.0362	0.287	0.0308	0.0357	0.016	0.0909	0.426	0.0568	0.295	0.231	0.0635
8886	2	4	0.0986	0.237	0.198	0.238	0.238	0.252	0.26	0.228	0.218	0.208	0.266	0.22
54520	2	21	0.511	0.278	0.456	0.275	0.274	0.613	0.366	0.493	0.267	0.484	0.33	0.262
51141	2	2	0.271	0.217	0.207	0.221	0.219	0.283	0.228	0.241	0.228	0.215	0.221	0.217
8685	2	7	0.151	0.314	0.217	0.317	0.317	0.207	0.332	0.251	0.28	0.246	0.258	0.265
55240	2	8	0.607	0.911	0.902	0.919	0.912	0.618	0.979	0.994	0.906	0.891	0.966	0.926
130355	2	8	0.241	0.097	0.059	0.0644	0.0969	0.496	0.17	0.164	0.0958	0.0603	0.101	0.0709
140738	2	1	0.372	0.372	0.356	0.372	0.372	0.459	0.459	0.462	0.373	0.373	0.378	0.364
6344	2	12	0.913	0.817	0.856	0.853	0.823	0.963	0.887	0.971	0.838	0.856	0.829	0.863
200373	2	8	0.588	0.294	0.297	0.359	0.288	0.443	0.175	0.187	0.269	0.306	0.47	0.341
5775	2	11	0.745	0.591	0.662	0.576	0.58	0.761	0.696	0.757	0.588	0.652	0.578	0.603
57669	2	13	0.226	0.807	0.556	0.779	0.8	0.41	0.698	0.664	0.816	0.569	0.592	0.784
5899	2	6	0.0557	0.485	0.396	0.472	0.487	0.105	0.345	0.288	0.456	0.371	0.417	0.496
2736	2	33	0.781	0.398	0.701	0.45	0.399	0.688	0.482	0.667	0.382	0.717	0.576	0.418
29842	2	5	0.983	0.95	0.951	0.936	0.947	0.929	0.866	0.97	0.972	0.971	0.988	0.956
23332	2	18	0.453	0.713	0.665	0.655	0.696	0.433	0.643	0.628	0.698	0.677	0.825	0.615
84365	2	3	0.0928	0.835	0.789	0.798	0.812	0.103	0.75	0.722	0.825	0.782	0.824	0.787
129684	2	160	0.0261	0.293	0.383	0.212	0.301	0.0301	0.388	0.265	0.303	0.383	0.291	0.238
2995	2	11	0.57	0.848	0.994	0.814		0.633	0.948	0.973	0.912	0.988	0.922	0.888
274	2	9	0.0349	0.488	0.644	0.431	0.487	0.0532	0.38	0.583	0.497	0.661	0.427	0.456
339761	2	5	0.253	0.709	0.874	0.702	0.715	0.29	0.602	0.814	0.757	0.884	0.821	0.748
2071	2	8	0.105	0.151	0.157	0.15	0.149	0.0462	0.0889	0.086	0.154	0.148	0.082	0.169
10746	2	2	0.734	0.719	0.694	0.708	0.711	0.866	0.84	0.822	0.722	0.672	0.707	0.724
55677	2	11	0.34	0.681	0.714	0.661	0.681	0.262	0.728	0.665	0.704	0.7	0.665	0.661
4648	2	5	0.686	0.338	0.518	0.34	0.34	0.765	0.356	0.45	0.345	0.511	0.439	0.356
55679	2	1	0.69	0.69	0.691	0.688	0.688	0.552	0.552	0.525	0.694	0.694	0.696	0.687
2840	2	1	0.69	0.69	0.691	0.688	0.688	0.552	0.552	0.525	0.694	0.694	0.696	0.648
55339	2	7	0.0162	0.00918	0.017	0.00167	0.00982	0.0126	0.00938	0.006	0.0069	0.012	0.0035	0.00201
83607	2	3	0.355	0.265	0.227	0.974	0.265	0.323	0.287	0.294	0.244	0.255	0.328	0.975
79595	2	15	0.484	0.862	0.676	0.849	0.861	0.526	0.713	0.696	0.854	0.674	0.716	0.856
56886	2	8	0.303	0.298	0.198	0.259	0.292	0.331	0.391	0.232	0.303	0.216	0.178	0.246
9394	2	8	0.527	0.271	0.239	0.272	0.266	0.57	0.28	0.252	0.294	0.264	0.286	0.274
84084	2	1	0.548	0.548	0.526	0.552	0.552	0.815	0.815	0.807	0.574	0.574	0.548	0.568
50649	2	12	0.218	0.157	0.058	0.096	0.155	0.157	0.134	0.064	0.107	0.0661	0.229	0.0729
130074	2	4	0.272	0.78	0.567	0.948	0.788	0.28	0.749	0.562	0.754	0.592	0.682	0.954
55041	2	1	0.93	0.93	0.944	0.929	0.929	0.957	0.957	0.96	0.942	0.942	0.948	0.925
113457	2	1	0.361	0.361	0.327		0.363	0.464	0.464	0.492	0.362	0.362	0.382
653784	2	1	0.5	0.5	0.475	0.501	0.501	0.6	0.6	0.611	0.491	0.49	0.518	0.498
29798	2	3	0.105	0.0584	0.081	0.0239	0.26	0.176	0.107	0.131	0.0595	0.0711	0.0589	0.0244
646915	2	2	0.966	0.964	0.965	0.963	0.963	0.961	0.947	0.963	0.972	0.975	0.975	0.976
2863	2	56	0.537	0.869	0.957	0.865	0.866	0.427	0.828	0.965	0.908	0.956	0.943	0.916
116372	2	4	0.441	0.619	0.601	0.718	0.614	0.522	0.701	0.686	0.623	0.59	0.572	0.771
344148	2	167	0.509	0.879	0.388	0.842	0.877	0.62	0.806	0.395	0.883	0.362	0.788	0.829
4249	2	44	0.164	0.724	0.421	0.746	0.722	0.105	0.648	0.271	0.662	0.455	0.607	0.681
81615	2	39	0.63	0.951	0.857	0.955	0.954	0.764	0.953	0.92	0.96	0.884	0.926	0.964
130013	2	12	0.164	0.778	0.541	0.746	0.788	0.332	0.598	0.447	0.735	0.541	0.49	0.747
905	2	3	0.58	0.778	0.598	0.772	0.771	0.613	0.807	0.866	0.748	0.635	0.662	0.73
80122	2	6	0.834	0.544	0.716	0.583	0.533	0.934	0.864	0.906	0.608	0.729	0.579	0.584
22930	2	5	0.509	0.537	0.202	0.527	0.531	0.888	0.838	0.711	0.449	0.185	0.326	0.46
84083	2	11	0.976	0.859	0.817	0.861	0.859	0.916	0.601	0.66	0.876	0.795	0.807	0.892
23518	2	11	0.343	0.141	0.144	0.136	0.137	0.522	0.284	0.347	0.116	0.116	0.142	0.123
23190	2	4	0.208	0.347	0.177	0.189	0.342	0.413	0.359	0.385	0.294	0.172	0.227	0.17
3938	2	10	0.0165	0.13	0.17	0.0916	0.124	0.0496	0.372	0.466	0.11	0.14	0.119	0.093
4175	2	5	0.0585	0.313	0.413	0.337	0.308	0.114	0.541	0.63	0.327	0.399	0.248	0.325
1615	2	3	0.109	0.125	0.109	0.124	0.124	0.382	0.208	0.226	0.116	0.111	0.119	0.105
80731	2	106	0.51	0.851	0.767	0.811	0.852	0.572	0.715	0.678	0.856	0.79	0.896	0.794
3176	2	3	0.851	0.832	0.748	0.837	0.838	0.688	0.789	0.617	0.832	0.75	0.776	0.819
339745	2	2	0.075	0.125	0.037	0.986	0.129	0.0898	0.142	0.062	0.0909	0.0526	0.0895	0.989
11249	2	18	0.989	0.869	0.99	0.814	0.863	0.973	0.89	0.99	0.915	0.987	0.98	0.87
53353	2	322	0.017	0.0736	0.327	0.113	0.0671	0.0172	0.105	0.295	0.0879	0.296	0.0539	0.148
8942	2	20	0.0142	0.0594	0.055	0.0434	0.0632	0.0101	0.104	0.062	0.0538	0.0548	0.0182	0.046
55843	2	89	0.266	0.124	0.195	0.124	0.131	0.31	0.0867	0.188	0.131	0.24	0.083	0.137
79712	2	16	0.466	0.58	0.334	0.533	0.567	0.562	0.666	0.487	0.501	0.332	0.662	0.48
9839	2	12	0.841	0.951	0.682	0.991	0.947	0.847	0.963	0.722	0.934	0.679	0.864	0.993
100505498	2	19	0.0974	0.114	0.099	0.127	0.113	0.0531	0.177	0.247	0.122	0.124	0.0781	0.129
92	2	8	0.148	0.704	0.841	0.717	0.706	0.156	0.605	0.781	0.755	0.839	0.697	0.766
5000	2	5	0.544	0.631	0.789	0.64	0.629	0.534	0.776	0.704	0.678	0.774	0.683	0.67
55777	2	38	0.899	0.869	0.579	0.814	0.868	0.819	0.876	0.551	0.888	0.585	0.841	0.845
26122	2	10	0.597	0.647	0.59	0.667	0.64	0.555	0.637	0.562	0.626	0.634	0.483	0.626
130576	2	37	0.196	0.337	0.213	0.317	0.328	0.117	0.217	0.218	0.278	0.205	0.262	0.271
130574	2	16	0.76	0.604	0.449	0.577	0.605	0.723	0.539	0.437	0.578	0.437	0.428	0.531
390	2	3	0.784	0.754	0.739	0.751	0.763	0.678	0.661	0.686	0.791	0.781	0.764	0.768
9111	2	10	0.115	0.379	0.468	0.322	0.377	0.181	0.363	0.458	0.34	0.475	0.647	0.29
7130	2	3	0.314	0.137	0.142	0.137	0.137	0.325	0.152	0.137	0.137	0.142	0.14	0.141
55183	2	9	0.0477	0.0128	0.019	0.0148	0.0115	0.0261	0.00551	0.012	0.0145	0.0203	0.0355	0.0159
4703	2	18	0.44	0.219	0.065	0.212	0.218	0.235	0.132	0.028	0.203	0.0666	0.119	0.198
26225	2	4	0.794	0.735	0.786	0.563	0.734	0.689	0.61	0.775	0.732	0.774	0.773	0.611
785	2	38	0.802	0.578	0.714	0.582	0.581	0.738	0.269	0.521	0.576	0.703	0.835	0.599
10254	2	7	0.498	0.515	0.43	0.559	0.51	0.206	0.349	0.236	0.502	0.433	0.328	0.577
114793	2	75	0.147	0.491	0.118	0.41	0.481	0.172	0.496	0.222	0.391	0.117	0.358	0.349
55660	2	4	0.0039	0.019	0.02	0.018	0.0182	0.00629	0.0219	0.032	0.016	0.0171	0.0654	0.0149
114805	2	84	0.277	0.376	0.532	0.344	0.378	0.36	0.383	0.628	0.375	0.5	0.453	0.387
100144595	2	4	0.213	0.0968	0.052	0.099	0.1	0.352	0.108	0.139	0.087	0.054	0.0444	0.0952
3760	2	22	0.0556	0.485	0.454	0.459	0.46	0.0415	0.401	0.437	0.523	0.464	0.386	0.426
4929	2	1	0.705	0.705	0.686	0.706	0.706	0.721	0.721	0.71	0.733	0.733	0.728	0.687
2820	2	23	0.884	0.705	0.9	0.674	0.701	0.834	0.541	0.765	0.669	0.881	0.864	0.654
11227	2	12	0.645	0.907	0.932	0.948	0.927	0.833	0.938	0.984	0.943	0.929	0.923	0.982
9595	2	9	0.458	0.594	0.672	0.546	0.588	0.491	0.703	0.677	0.596	0.705	0.62	0.556
130399	2	6	0.212	0.839	0.834	0.85	0.814	0.207	0.884	0.954	0.868	0.857	0.817	0.867
90	2	8	0.291	0.324	0.292	0.271	0.32	0.296	0.339	0.297	0.301	0.312	0.291	0.268
151531	2	17	0.699	0.814	0.82	0.81	0.806	0.807	0.891	0.767	0.781	0.809	0.93	0.813
130940	2	35	0.433	0.188	0.61	0.141	0.185	0.381	0.196	0.753	0.22	0.602	0.279	0.167
8502	2	46	0.261	0.488	0.571	0.452	0.494	0.246	0.525	0.655	0.452	0.591	0.437	0.449
92196	2	3	0.406	0.242	0.276	0.123	0.242	0.311	0.165	0.249	0.221	0.28	0.241	0.126
85461	2	56	0.523	0.463	0.062	0.514	0.459	0.522	0.398	0.048	0.314	0.0487	0.0734	0.434
151525	2	14	0.653	0.538	0.769	0.538	0.54	0.844	0.687	0.886	0.511	0.771	0.699	0.534
29994	2	39	0.767	0.621	0.731	0.588	0.62	0.779	0.495	0.6	0.613	0.727	0.839	0.537
64844	2	6	0.129	0.154	0.107	0.0785	0.16	0.109	0.116	0.082	0.142	0.121	0.131	0.075
9936	2	8	0.317	0.225	0.208	0.228	0.227	0.359	0.154	0.14	0.223	0.219	0.312	0.229
100526664	2	28	0.607	0.68	0.423	0.626	0.677	0.739	0.658	0.334	0.636	0.44	0.569	0.584
4065	2	18	0.68	0.914	0.831	0.905	0.912	0.796	0.913	0.974	0.935	0.833	0.87	0.886
22925	2	37	0.686	0.866	0.728	0.848	0.856	0.649	0.802	0.48	0.876	0.732	0.784	0.867
3694	2	13	0.261	0.161	0.375	0.173	0.162	0.387	0.198	0.35	0.137	0.389	0.154	0.172
5937	2	32	0.242	0.032	0.088	0.0269	0.0334	0.56	0.129	0.113	0.0372	0.13	0.0519	0.0345
10010	2	14	0.0634	0.54	0.333	0.502	0.535	0.0315	0.635	0.327	0.497	0.305	0.411	0.458
10213	2	13	0.228	0.704	0.782	0.7	0.701	0.442	0.615	0.795	0.722	0.774	0.826	0.736
10716	2	2	0.805	0.828	0.82	0.828	0.82	0.715	0.778	0.672	0.837	0.816	0.851	0.853
57282	2	16	0.387	0.238	0.552	0.245	0.239	0.212	0.203	0.374	0.23	0.549	0.471	0.274
1803	2	9	0.767	0.621	0.571	0.619	0.615	0.612	0.467	0.388	0.631	0.607	0.713	0.646
2641	2	1	0.861	0.861	0.847	0.859	0.859	0.978	0.978	0.99	0.87	0.87	0.883	0.859
2191	2	6	0.675	0.585	0.729	0.562	0.571	0.675	0.661	0.737	0.586	0.73	0.631	0.529
64135	2	3	0.704	0.822	0.9	0.83	0.824	0.737	0.85	0.909	0.853	0.892	0.853	0.867
25801	2	2	0.858	0.808	0.789	0.817	0.819	0.953	0.916	0.935	0.812	0.806	0.821	0.838
90134	2	30	0.00275	0.375	0.469	0.418	0.378	0.00205	0.523	0.638	0.411	0.477	0.321	0.421
55137	2	15	0.244	0.375	0.389	0.317	0.32	0.304	0.383	0.333	0.327	0.385	0.505	0.295
2888	2	10	0.549	0.539	0.451	0.844	0.542	0.491	0.519	0.435	0.509	0.465	0.367	0.814
22837	2	28	0.208	0.481	0.548	0.421	0.485	0.193	0.516	0.511	0.44	0.532	0.395	0.386
151258	2	9	0.172	0.513	0.62	0.518	0.52	0.191	0.591	0.739	0.534	0.641	0.449	0.513
6328	2	17	0.485	0.394	0.427	0.402	0.387	0.52	0.399	0.467	0.407	0.433	0.287	0.375
6326	2	14	0.677	0.965	0.964	0.957	0.963	0.827	0.992	0.999	0.988	0.98	0.979	0.982
80034	2	22	0.659	0.49	0.555	0.468	0.494	0.761	0.476	0.555	0.47	0.576	0.5	0.438
2591	2	3	0.845	0.896	0.904	0.895	0.9	0.873	0.944	0.977	0.915	0.903	0.912	0.902
79809	2	5	0.273	0.49	0.534	0.497	0.492	0.214	0.394	0.363	0.447	0.521	0.543	0.445
6323	2	33	0.71	0.609	0.381	0.598	0.611	0.747	0.357	0.253	0.577	0.391	0.53	0.586
6335	2	24	0.76	0.484	0.539	0.466	0.489	0.71	0.375	0.421	0.431	0.52	0.344	0.444
6332	2	5	0.737	0.574	0.58	0.575	0.572	0.611	0.482	0.443	0.566	0.615	0.672	0.521
129446	2	44	0.558	0.606	0.59	0.681	0.616	0.407	0.649	0.668	0.589	0.636	0.654	0.691
8708	2	5	0.877	0.922	0.866	0.91	0.93	0.717	0.763	0.621	0.93	0.857	0.892	0.895
27347	2	73	0.0393	0.00859	0.024	0.011	0.00985	0.137	0.00767	0.082	0.014	0.023	0.0362	0.0206
253782	2	60	0.286	0.885	0.744	0.886	0.874	0.327	0.666	0.822	0.87	0.724	0.776	0.867
115677	2	19	0.884	0.933	0.864	0.887	0.932	0.933	0.883	0.946	0.951	0.895	0.938	0.903
57818	2	2	0.209	0.0828	0.088	0.0752	0.0815	0.323	0.139	0.139	0.0749	0.082	0.0884	0.0745
8647	2	20	0.103	0.805	0.874	0.791	0.799	0.122	0.879	0.989	0.832	0.888	0.75	0.831
4036	2	51	0.0641	0.0901	0.058	0.0741	0.0996	0.0675	0.0494	0.064	0.0584	0.0547	0.209	0.0568
129880	2	2	0.859	0.757	0.779		0.745	0.983	0.917	0.953	0.746	0.767	0.802
10324	2	1	0.713	0.713	0.704	0.714	0.714	0.638	0.638	0.621	0.752	0.752	0.744	0.717
79675	2	2	0.221	0.244	0.172	0.243	0.243	0.136	0.154	0.08	0.215	0.165	0.219	0.228
9360	2	7	0.578	0.436	0.492	0.435	0.435	0.635	0.47	0.522	0.429	0.491	0.579	0.432
129881	2	10	0.218	0.204	0.082	0.286	0.204	0.2	0.251	0.063	0.195	0.0794	0.169	0.251
100526832	2	11	0.323	0.87	0.739	0.819	0.864	0.181	0.869	0.53	0.868	0.742	0.772	0.818
151230	2	6	0.163	0.741	0.631	0.735	0.736	0.0785	0.634	0.419	0.675	0.616	0.646	0.666
6741	2	1	0.223	0.223	0.236	0.219	0.219	0.137	0.137	0.158	0.233	0.233	0.215	0.224
29081	2	3	0.301	0.587	0.525	0.585	0.594	0.211	0.471	0.29	0.557	0.525	0.488	0.551
130507	2	19	0.422	0.893	0.956	0.897	0.896	0.408	0.758	0.859	0.921	0.939	0.971	0.922
140469	2	89	0.143	0.266	0.076	0.218	0.261	0.125	0.285	0.107	0.217	0.0579	0.116	0.194
285141	2	3	0.828	0.765	0.796	0.778	0.769	0.594	0.688	0.51	0.778	0.785	0.783	0.805
2571	2	4	0.61	0.818	0.798	0.819	0.805	0.722	0.855	0.89	0.83	0.781	0.86	0.819
26003	2	3	0.895	0.892	0.913	0.885	0.89	0.914	0.927	0.937	0.906	0.921	0.894	0.905
9874	2	28	0.292	0.736	0.887	0.742	0.74	0.309	0.764	0.964	0.788	0.903	0.857	0.8
79828	2	8	0.0983	0.39	0.369	0.417	0.388	0.13	0.521	0.676	0.397	0.368	0.407	0.416
80067	2	8	0.323	0.117	0.219	0.117	0.117	0.591	0.332	0.546	0.119	0.224	0.17	0.104
79901	2	3	0.0142	0.0597	0.016	0.278	0.0561	0.0217	0.0845	0.02	0.0527	0.0172	0.0207	0.26
1781	2	5	0.0751	0.117	0.178	0.141	0.118	0.0812	0.135	0.255	0.118	0.175	0.11	0.149
8604	2	12	0.445	0.0938	0.283	0.0861	0.0966	0.454	0.0923	0.284	0.101	0.303	0.0955	0.109
8520	2	4	0.0437	0.0179	0.016	0.012	0.0183	0.0382	0.0167	0.0164	0.0193	0.0203	0.021	0.0114
254042	2	7	0.147	0.301	0.293	0.238	0.301	0.14	0.366	0.342	0.283	0.291	0.21	0.221
3655	2	15	0.334	0.263	0.306	0.246	0.261	0.598	0.418	0.51	0.235	0.31	0.289	0.237
5163	2	5	0.484	0.326	0.242	0.323	0.322	0.567	0.493	0.413	0.316	0.265	0.277	0.308
11069	2	65	0.0241	0.203	0.329	0.204	0.202	0.0658	0.311	0.382	0.204	0.351	0.119	0.229
51776	2	24	0.792	0.516	0.422	0.357	0.511	0.55	0.417	0.292	0.469	0.462	0.489	0.324
83879	2	5	0.976	0.984	0.976	0.984	0.983	0.989	0.995	1	0.982	0.968	0.988	0.984
6670	2	5	0.00997	0.0116	0.039	0.011	0.0111	0.0194	0.0158	0.033	0.0129	0.0279	0.011	0.013
29789	2	29	0.376	0.794	0.585	0.782	0.792	0.3	0.742	0.71	0.832	0.583	0.769	0.786
9541	2	4	0.882	0.763	0.615	0.3	0.765	0.893	0.851	0.721	0.748	0.62	0.687	0.283
79634	2	3	0.23	0.309	0.174	0.306	0.307	0.265	0.32	0.153	0.27	0.177	0.258	0.288
151556	2	4	0.288	0.406	0.14	0.402	0.403	0.346	0.336	0.202	0.306	0.133	0.332	0.341
7456	2	11	0.624	0.0837	0.183	0.0828	0.0818	0.637	0.0962	0.211	0.0905	0.186	0.13	0.0862
1134	2	4	0.635	0.671	0.576	0.724	0.67	0.673	0.728	0.564	0.657	0.598	0.613	0.739
1123	2	16	0.891	0.844	0.748	0.841	0.841	0.956	0.871	0.796	0.834	0.75	0.831	0.832
1386	2	8	0.326	0.713	0.669	0.688	0.714	0.251	0.645	0.611	0.69	0.618	0.476	0.662
80856	2	2	0.85	0.846	0.866	0.842	0.847	0.821	0.822	0.821	0.851	0.874	0.869	0.849
10651	2	3	0.775	0.767	0.762	0.837	0.763	0.87	0.828	0.859	0.79	0.772	0.791	0.872
4780	2	4	0.678	0.621	0.481	0.612	0.616	0.519	0.407	0.313	0.608	0.472	0.606	0.593
8540	2	15	0.481	0.0986	0.141	0.0993	0.0969	0.323	0.096	0.111	0.11	0.156	0.132	0.0985
[truncated: 11,175 more rows]

## Sheet: Gene analysis (10kb window)
Results from gene analysis of CD data, with additional 10 kilobase window around transcription site
Entrez ID	Chromosome	No. of SNPs	MAGMA-main	MAGMA-mean	MAGMA-top
401934	1	1	0.012818	0.012818	0.0116
254173	1	1	0.2828	0.2828	0.244
8784	1	1	0.2828	0.2828	0.244
7293	1	2	0.38556	0.3179	0.391
51150	1	3	0.10012	0.084067	0.103
126792	1	2	0.066351	0.052137	0.068
118424	1	1	0.25014	0.25014	0.249
6339	1	1	0.25014	0.25014	0.249
54973	1	1	0.95314	0.95314	0.972
80772	1	1	0.95314	0.95314	0.972
83756	1	1	0.95314	0.95314	0.972
1855	1	1	0.95314	0.95314	0.972
441869	1	1	0.0041031	0.0041031	0.0036
643965	1	1	0.0041031	0.0041031	0.0042
64856	1	1	0.0041031	0.0041031	0.004
55210	1	1	0.044911	0.044912	0.045
339453	1	1	0.044911	0.044912	0.045
29101	1	4	0.36861	0.09743	0.106
65220	1	3	0.18705	0.088566	0.176
2782	1	8	0.20759	0.26686	0.469
85452	1	1	0.90956	0.90956	0.917
5590	1	8	0.38617	0.49356	0.693
100506504	1	3	0.70928	0.50043	0.507
199990	1	1	0.34501	0.34501	0.347
6497	1	6	0.27043	0.25102	0.388
79906	1	12	0.15484	0.6368	0.187
11079	1	3	0.98897	0.9902	0.989
5192	1	2	0.96248	0.96552	0.962
9651	1	2	0.64492	0.51191	0.633
55229	1	5	0.70724	0.29307	0.359
388585	1	4	0.57701	0.25391	0.313
127281	1	2	0.04781	0.029284	0.053
79258	1	6	0.18259	0.36632	0.083
100287898	1	1	0.16369	0.16369	0.17
63976	1	46	0.17098	0.15189	0.115
27237	1	3	0.38971	0.26108	0.213
1953	1	7	0.35797	0.25933	0.216
127262	1	1	0.771	0.771	0.748
49856	1	1	0.771	0.771	0.748
7161	1	5	0.14241	0.37243	0.307
57212	1	4	0.56085	0.68396	0.573
148870	1	7	0.66735	0.73018	0.733
388588	1	6	0.7634	0.77801	0.807
57470	1	7	0.84885	0.84431	0.938
9731	1	14	0.018303	0.82996	0.521
1677	1	5	0.011867	0.79352	0.728
339448	1	2	0.87898	0.79232	0.836
55966	1	38	0.73738	0.75209	0.501
261734	1	31	0.69843	0.2331	0.491
8514	1	12	0.15798	0.35675	0.481
26038	1	4	0.06886	0.13613	0.069
388591	1	2	0.79517	0.66125	0.682
23463	1	2	0.79517	0.66125	0.682
387509	1	1	0.16833	0.16833	0.188
11332	1	12	0.022871	0.016043	0.017
54626	1	1	0.43356	0.43356	0.444
83715	1	3	0.058305	0.034077	0.029
8718	1	1	0.013835	0.013834	0.0142
57449	1	3	0.090445	0.052806	0.033
79707	1	3	0.29371	0.86951	0.787
80835	1	3	0.13215	0.50806	0.263
3104	1	3	0.50121	0.24092	0.257
9903	1	3	0.50121	0.24092	0.257
90326	1	1	0.25238	0.25238	0.262
55735	1	15	0.48321	0.26696	0.38
23261	1	149	0.0042432	0.4706	0.808
9341	1	9	0.013	0.13655	0.127
8863	1	14	0.12953	0.12145	0.037
10911	1	4	0.0022021	0.0003455	0.0088
3604	1	7	0.42443	0.57733	0.657
11315	1	2	0.32044	0.44428	0.52
54206	1	3	0.32874	0.32807	0.261
50651	1	3	0.019536	0.0087119	0.018
473	1	41	0.70399	0.10109	0.171
2023	1	4	0.53352	0.29003	0.297
765	1	10	0.60683	0.54191	0.561
155184	1	7	0.82309	0.83853	0.916
6518	1	8	0.67579	0.4846	0.479
80045	1	3	0.52166	0.35915	0.328
9563	1	8	0.85893	0.94047	0.974
80176	1	20	0.78877	0.58138	0.479
84275	1	4	0.79378	0.65188	0.6
199953	1	6	0.67061	0.49984	0.535
5293	1	5	0.16821	0.20718	0.319
56998	1	4	0.69255	0.49445	0.491
64802	1	2	0.89388	0.74323	0.837
10277	1	8	0.67977	0.80037	0.359
23095	1	24	0.86724	0.78045	0.328
5226	1	3	0.046827	0.02914	0.102
378708	1	3	0.098911	0.098141	0.115
100526739	1	3	0.098911	0.098141	0.115
1325	1	1	0.65243	0.65243	0.655
5195	1	24	0.1757	0.038431	0.075
54897	1	12	0.82608	0.70697	0.773
148345	1	7	0.33643	0.32879	0.579
23435	1	5	0.025249	0.092444	0.099
10747	1	2	0.11024	0.042195	0.046
6723	1	1	0.54093	0.54093	0.565
5394	1	3	0.80519	0.75775	0.79
2475	1	26	0.14233	0.96195	0.786
10218	1	4	0.95438	0.94945	0.992
57540	1	8	0.68022	0.58578	0.695
26232	1	2	0.11569	0.49172	0.318
26270	1	1	0.70176	0.70176	0.71
10459	1	3	0.77034	0.7045	0.736
374946	1	5	0.63013	0.5387	0.668
57085	1	4	0.21847	0.12911	0.332
284498	1	4	0.29377	0.12868	0.263
100506310	1	3	0.35848	0.14735	0.179
4524	1	4	0.015919	0.10063	0.085
1185	1	18	0.030455	0.12349	0.083
4878	1	9	0.019241	0.1819	0.059
4879	1	3	0.79806	0.75546	0.886
90231	1	1	0.27297	0.27297	0.246
9927	1	3	0.56671	0.38033	0.371
943	1	6	0.23529	0.35512	0.146
7133	1	12	0.74487	0.78317	0.791
55187	1	13	0.84676	0.81161	0.911
9249	1	6	0.034816	0.055718	0.032
343066	1	4	0.94737	0.74317	0.885
126767	1	7	0.016736	0.52854	0.39
93190	1	5	0.63998	0.42736	0.479
390999	1	2	0.16873	0.1765	0.118
65121	1	1	0.98666	0.98666	0.988
343069	1	2	0.35247	0.42748	0.371
65122	1	2	0.35247	0.42748	0.371
126755	1	9	0.30091	0.19775	0.117
10630	1	13	0.78465	0.70397	0.626
7799	1	37	0.29246	0.15789	0.517
23254	1	113	0.044374	0.60456	0.125
55092	1	34	0.27537	0.49185	0.58
114827	1	22	0.40367	0.18382	0.046
79180	1	5	0.0091912	0.016452	0.018
11330	1	1	0.031939	0.031939	0.033
63036	1	2	0.39559	0.53621	0.407
51032	1	4	0.46175	0.38691	0.433
842	1	16	0.55865	0.37697	0.574
23341	1	9	0.49987	0.35802	0.535
79814	1	7	0.62776	0.42256	0.578
84301	1	8	0.036121	0.26355	0.17
6248	1	5	0.01824	0.25181	0.158
23207	1	10	0.32638	0.2883	0.306
284723	1	2	0.95951	0.96083	0.962
388595	1	1	0.816	0.816	0.787
54751	1	3	0.55992	0.51478	0.531
23013	1	12	0.55548	0.40444	0.419
7709	1	8	0.099693	0.54995	0.537
149563	1	5	0.87388	0.76608	0.838
27129	1	6	0.93269	0.86042	0.908
1187	1	3	0.99211	0.98872	0.987
1188	1	2	0.96176	0.96141	0.955
1969	1	2	0.46261	0.25218	0.362
128272	1	5	0.87898	0.60625	0.495
79363	1	1	0.15835	0.15836	0.145
54455	1	13	0.3574	0.069987	0.152
26099	1	2	0.44509	0.35536	0.378
374955	1	3	0.58574	0.56947	0.472
55707	1	4	0.09846	0.074653	0.122
55672	1	2	0.43396	0.37959	0.506
9696	1	3	0.56079	0.67105	0.662
4237	1	3	0.836	0.83519	0.774
23400	1	5	0.96798	0.93094	0.879
6390	1	15	0.58225	0.8496	0.973
11240	1	29	0.091274	0.72965	0.368
29943	1	17	0.28009	0.47374	0.454
51702	1	13	0.67732	0.67117	0.422
23569	1	17	0.02966	0.16328	0.179
353238	1	10	0.66112	0.82462	0.519
55920	1	5	0.30191	0.91926	0.883
55160	1	17	0.50678	0.85826	0.835
81569	1	16	0.048875	0.0070043	0.0026
84966	1	79	0.50614	0.4567	0.884
127707	1	7	0.77668	0.56987	0.749
5081	1	14	0.69779	0.67721	0.35
80834	1	3	0.39175	0.45322	0.346
126917	1	5	0.83201	0.87882	0.874
23352	1	23	0.95548	0.96276	0.983
23065	1	10	0.34143	0.91218	0.829
51154	1	5	0.51404	0.79632	0.674
22977	1	2	0.51683	0.36934	0.41
8574	1	4	0.46307	0.54279	0.291
54896	1	8	0.45155	0.72225	0.401
832	1	56	0.61836	0.36554	0.403
440574	1	5	0.42446	0.58532	0.62
100532736	1	7	0.5467	0.80401	0.778
4681	1	2	0.98777	0.98853	0.978
3362	1	6	0.77456	0.94055	0.968
255104	1	22	0.47049	0.93675	0.878
54546	1	10	0.62801	0.56679	0.355
23252	1	5	0.72387	0.76313	0.723
30814	1	5	0.43356	0.20947	0.23
5320	1	10	0.70238	0.40501	0.46
5322	1	12	0.0072213	0.2203	0.151
26279	1	4	0.65768	0.54015	0.69
64600	1	2	0.17276	0.18954	0.146
391013	1	7	0.12388	0.08048	0.091
127733	1	7	0.56019	0.47608	0.377
127731	1	21	0.17744	0.20505	0.254
79594	1	2	0.34409	0.31938	0.277
163933	1	8	0.33434	0.14099	0.118
978	1	9	0.035991	0.020854	0.154
65018	1	14	0.19804	0.020401	0.083
1650	1	11	0.42249	0.024905	0.07
57576	1	16	0.60566	0.60545	0.455
400745	1	5	0.57451	0.81408	0.686
50809	1	6	0.1865	0.31354	0.35
8672	1	24	0.018281	0.30693	0.386
1889	1	14	0.11701	0.16562	0.574
84224	1	4	0.48342	0.3451	0.242
249	1	17	0.10918	0.02504	0.097
5909	1	14	0.19876	0.013707	0.027
84196	1	13	0.098648	0.35082	0.383
401944	1	1	0.7747	0.7747	0.767
3339	1	9	0.16117	0.3596	0.445
23436	1	2	0.98859	0.96793	0.983
10136	1	2	0.3925	0.57323	0.501
998	1	12	0.57666	0.35261	0.446
54361	1	8	0.23061	0.49139	0.517
9923	1	12	0.99902	0.97544	0.999
2046	1	6	0.57488	0.30071	0.342
712	1	2	0.11129	0.071825	0.074
714	1	4	0.090699	0.071206	0.102
713	1	6	0.52686	0.2113	0.41
2048	1	24	0.7175	0.18695	0.386
646262	1	9	0.048941	0.4324	0.309
729059	1	2	0.70444	0.76821	0.849
23028	1	5	0.28371	0.37496	0.128
7798	1	9	0.15727	0.29074	0.157
3352	1	4	0.33799	0.61578	0.525
10236	1	3	0.99136	0.9803	0.975
80818	1	7	0.53425	0.7259	0.742
6920	1	18	0.01052	0.42873	0.538
55616	1	14	0.24137	0.41998	0.39
1870	1	3	0.7136	0.59969	0.59
3399	1	1	0.89655	0.89655	0.887
6135	1	1	0.7921	0.7921	0.796
6924	1	2	0.95523	0.96216	0.936
57095	1	1	0.55036	0.55036	0.522
11313	1	1	0.55036	0.55036	0.522
2582	1	2	0.54961	0.58424	0.546
3155	1	1	0.6142	0.6142	0.579
127294	1	16	0.22781	0.013093	0.086
58985	1	5	0.72939	0.88892	0.893
163702	1	7	0.41204	0.53617	0.434
57822	1	8	0.28815	0.88623	0.823
90529	1	20	0.32544	0.59802	0.427
57185	1	15	0.60639	0.58841	0.393
11123	1	4	0.73915	0.48214	0.488
400746	1	10	0.35747	0.51177	0.498
25932	1	4	0.53978	0.79359	0.869
864	1	19	0.26914	0.61922	0.521
6006	1	1	0.14023	0.14023	0.131
55219	1	3	0.2746	0.16668	0.156
26119	1	1	0.68106	0.68106	0.683
57134	1	25	0.20403	0.020819	0.063
57190	1	5	0.70844	0.42883	0.661
56181	1	3	0.55688	0.3601	0.47
79000	1	4	0.11144	0.34785	0.34
3925	1	3	0.27378	0.603	0.595
5051	1	12	0.057902	0.26158	0.018
2134	1	3	0.63319	0.52842	0.682
7780	1	2	0.7649	0.49278	0.524
84676	1	5	0.065232	0.38365	0.314
149420	1	4	0.38498	0.33113	0.163
79927	1	1	0.5966	0.5966	0.596
51042	1	2	0.17354	0.1251	0.101
10256	1	4	0.45785	0.21828	0.232
378807	1	3	0.68699	0.39176	0.438
64793	1	7	0.031509	0.16826	0.101
83442	1	3	0.094219	0.049807	0.058
91544	1	5	0.013327	0.099659	0.03
1043	1	1	0.013199	0.013199	0.0142
55057	1	7	0.21584	0.18744	0.059
257101	1	3	0.79505	0.43737	0.552
79727	1	3	0.038239	0.17778	0.066
79947	1	2	0.81402	0.87079	0.829
6195	1	6	0.19762	0.19525	0.129
8289	1	2	0.062043	0.093054	0.044
84243	1	2	0.13589	0.052929	0.111
8431	1	1	0.026713	0.026713	0.034
10726	1	2	0.069856	0.048425	0.06
646567	1	1	0.24672	0.24672	0.232
388610	1	1	0.24672	0.24672	0.232
6548	1	6	0.086283	0.054483	0.048
23038	1	2	0.27651	0.24855	0.261
388611	1	1	0.57243	0.57243	0.56
2827	1	1	0.57243	0.57243	0.56
10163	1	3	0.18939	0.60714	0.478
27245	1	3	0.38608	0.45531	0.25
2268	1	4	0.45584	0.39198	0.236
2537	1	1	0.63633	0.63636	0.658
199870	1	5	0.64097	0.46942	0.59
23673	1	2	0.81964	0.82816	0.759
5511	1	1	0.53163	0.53163	0.502
9473	1	6	0.2761	0.18308	0.253
6118	1	9	0.58595	0.15991	0.205
27293	1	3	0.72836	0.74778	0.797
55113	1	1	0.60456	0.60456	0.596
2140	1	8	0.82092	0.72909	0.913
5724	1	2	0.062598	0.054277	0.035
22826	1	5	0.057717	0.019328	0.025
93974	1	3	0.011351	0.035852	0.029
83667	1	2	0.20091	0.20656	0.208
65979	1	5	0.90956	0.72263	0.732
1104	1	2	0.42075	0.38705	0.403
54952	1	1	0.39353	0.39353	0.41
6883	1	1	0.59962	0.59962	0.596
10691	1	2	0.6482	0.46893	0.589
51441	1	3	0.46005	0.26631	0.27
4985	1	8	0.6178	0.54331	0.699
2035	1	15	0.11869	0.36343	0.241
399474	1	1	0.39389	0.39389	0.388
6429	1	3	0.57592	0.35245	0.413
51102	1	4	0.82512	0.84775	0.877
10076	1	16	0.32997	0.26767	0.231
4146	1	12	0.68074	0.55976	0.682
7805	1	7	0.81526	0.79431	0.905
9672	1	7	0.33246	0.2601	0.263
9698	1	13	0.49501	0.86224	0.849
79570	1	13	0.89835	0.73255	0.842
9410	1	9	0.55264	0.8404	0.826
51538	1	16	0.60238	0.83351	0.916
2170	1	8	0.62638	0.70754	0.936
347735	1	8	0.24586	0.16376	0.113
64129	1	3	0.77959	0.62655	0.643
3061	1	4	0.337	0.043563	0.087
553115	1	7	0.22811	0.086863	0.101
1307	1	11	0.68206	0.30358	0.494
576	1	2	0.6547	0.65239	0.649
90853	1	2	0.5909	0.49451	0.54
149069	1	1	0.63312	0.63312	0.68
56063	1	1	0.63312	0.63312	0.68
8668	1	3	0.61393	0.595	0.513
3932	1	1	0.71115	0.71115	0.705
728116	1	2	0.14941	0.80846	0.813
653121	1	3	0.51333	0.53354	0.336
5928	1	2	0.33421	0.15418	0.167
81493	1	3	0.53307	0.15807	0.175
57648	1	3	0.55859	0.32606	0.324
8565	1	5	0.65257	0.49582	0.33
64766	1	5	0.016589	0.029949	0.0042
252995	1	4	0.013108	0.0095236	0.0024
3208	1	2	0.25768	0.11115	0.114
113452	1	2	0.25768	0.11115	0.114
127544	1	2	0.25151	0.1149	0.164
204	1	1	0.51479	0.51479	0.503
113451	1	3	0.86206	0.795	0.851
55223	1	4	0.86923	0.93006	0.959
149076	1	5	0.050405	0.38164	0.215
127550	1	3	0.029643	0.23985	0.143
1912	1	7	0.01364	0.056827	0.081
7579	1	6	0.6952	0.73557	0.806
114784	1	145	0.67118	0.48263	0.646
127540	1	5	0.18978	0.20108	0.145
84970	1	16	0.34444	0.36741	0.503
113444	1	5	0.55366	0.35255	0.318
58512	1	2	0.2081	0.14134	0.183
100506144	1	1	0.50402	0.50402	0.517
9204	1	2	0.75265	0.49134	0.539
6421	1	3	0.040722	0.0072009	0.0066
9202	1	2	0.70482	0.58454	0.658
79932	1	4	0.3295	0.32227	0.334
23154	1	2	0.18428	0.3282	0.226
5690	1	2	0.64487	0.71476	0.659
63967	1	4	0.88521	0.73491	0.819
192670	1	1	0.47788	0.47788	0.496
26523	1	4	0.77787	0.79833	0.789
192669	1	4	0.047705	0.62059	0.534
27285	1	2	0.72704	0.71604	0.811
54936	1	4	0.67876	0.76352	0.881
1296	1	4	0.67876	0.76352	0.881
27095	1	6	0.81648	0.93491	0.989
55700	1	5	0.74903	0.94397	0.982
9967	1	4	0.24621	0.066735	0.124
79729	1	2	0.12492	0.081575	0.124
83931	1	7	0.19375	0.087021	0.074
84967	1	5	0.30351	0.16527	0.19
127700	1	9	0.56518	0.40151	0.313
64960	1	7	0.77477	0.71927	0.35
1441	1	4	0.28133	0.24418	0.063
2899	1	48	0.020216	0.091285	0.385
80149	1	4	0.34931	0.22343	0.283
64769	1	3	0.40714	0.36293	0.306
79753	1	2	0.57285	0.39099	0.56
7802	1	3	0.24791	0.19076	0.107
29889	1	5	0.48194	0.23281	0.157
284654	1	3	0.92336	0.94259	0.976
54955	1	5	0.094856	0.011314	0.009
55143	1	7	0.099248	0.024615	0.01
284656	1	8	0.28668	0.30411	0.252
149175	1	3	0.92498	0.94085	0.892
79693	1	2	0.99605	0.98846	0.993
127687	1	1	0.93254	0.93254	0.925
4520	1	1	0.93254	0.93254	0.925
3633	1	3	0.96359	0.85304	0.898
10946	1	5	0.75638	0.75032	0.878
5453	1	1	0.92429	0.92429	0.919
64121	1	4	0.97373	0.93063	0.909
26292	1	4	0.97419	0.98189	0.97
81025	1	6	0.26224	0.93555	0.882
54933	1	12	0.36645	0.82736	0.597
79647	1	5	0.94439	0.86491	0.788
4725	1	4	0.58868	0.86515	0.811
23499	1	29	0.00096915	0.16247	0.146
643314	1	3	0.31363	0.50903	0.556
353500	1	3	0.099235	0.1193	0.141
8761	1	6	0.15341	0.14477	0.209
26508	1	4	0.20494	0.1716	0.284
84618	1	4	0.5474	0.34444	0.337
51440	1	12	0.33859	0.3999	0.567
10450	1	4	0.52122	0.43978	0.374
656	1	4	0.4259	0.33368	0.359
54802	1	8	0.42586	0.49794	0.57
4610	1	1	0.29754	0.29754	0.287
84879	1	2	0.35639	0.20801	0.326
10487	1	13	0.071381	0.23292	0.205
5538	1	7	0.059802	0.13473	0.123
6018	1	1	0.99604	0.99604	0.991
10269	1	4	0.38434	0.23395	0.249
1298	1	3	0.43803	0.49531	0.29
64744	1	11	0.1272	0.34296	0.283
65243	1	8	0.26488	0.4568	0.081
339559	1	6	0.61653	0.71342	0.763
64789	1	5	0.5557	0.45683	0.457
127396	1	9	0.077528	0.56002	0.657
9783	1	13	0.81896	0.52431	0.599
4802	1	19	0.087211	0.68985	0.855
9132	1	16	0.76947	0.90334	0.84
163732	1	1	0.86773	0.86773	0.886
1503	1	2	0.57994	0.68484	0.775
200172	1	1	0.5197	0.5197	0.508
22955	1	26	0.97408	0.6782	0.798
100132074	1	11	0.96559	0.90382	0.949
1907	1	1	0.15174	0.15174	0.146
59269	1	101	0.032982	0.19629	0.512
22887	1	14	0.18838	0.43645	0.136
284716	1	14	0.20146	0.71716	0.532
84217	1	11	0.0016662	0.38382	0.406
79717	1	1	0.43523	0.43523	0.417
728621	1	12	0.23975	0.42351	0.522
10465	1	2	0.2302	0.33681	0.228
4904	1	4	0.3908	0.18669	0.223
100129924	1	3	0.19697	0.64493	0.438
374969	1	4	0.315	0.6017	0.54
114625	1	9	0.61951	0.70805	0.815
51058	1	2	0.66145	0.44046	0.538
6513	1	10	0.96459	0.64689	0.748
440585	1	9	0.81084	0.74602	0.734
10969	1	7	0.78711	0.35292	0.498
149465	1	17	0.78857	0.66289	0.832
128218	1	3	0.69902	0.37314	0.382
149466	1	3	0.62869	0.46299	0.652
7075	1	5	0.49878	0.53482	0.79
4352	1	2	0.57175	0.64422	0.523
991	1	1	0.92608	0.92608	0.919
64834	1	2	0.81848	0.8208	0.779
112950	1	2	0.51425	0.6716	0.748
23334	1	8	0.020849	0.65415	0.529
81888	1	4	0.5777	0.76643	0.486
5792	1	13	0.54515	0.56568	0.693
9682	1	7	0.95819	0.89689	0.866
6487	1	36	0.74189	0.95874	0.952
9048	1	7	0.93824	0.82673	0.705
9670	1	9	0.76081	0.88706	0.956
1802	1	3	0.81296	0.73968	0.774
533	1	3	0.81296	0.73968	0.774
8704	1	2	0.82235	0.75746	0.761
6536	1	2	0.26243	0.33867	0.496
128209	1	4	0.052348	0.39029	0.129
55929	1	2	0.94748	0.94834	0.973
79033	1	22	0.27614	0.93978	0.66
55182	1	38	0.19723	0.11631	0.042
79639	1	1	0.26853	0.26853	0.265
339541	1	5	0.37333	0.64657	0.778
11004	1	2	0.93465	0.93486	0.957
6202	1	1	0.78637	0.78637	0.799
1263	1	1	0.95309	0.95309	0.949
343521	1	1	0.95309	0.95309	0.949
149478	1	1	0.95309	0.95309	0.949
8643	1	2	0.7792	0.75355	0.78
8891	1	22	0.8386	0.66177	0.853
79654	1	4	0.0992	0.45917	0.078
7389	1	3	0.10175	0.32676	0.074
57643	1	12	0.038125	0.11303	0.1
84842	1	3	0.86967	0.72299	0.837
4595	1	6	0.6857	0.60862	0.8
114034	1	6	0.63809	0.52671	0.677
10420	1	15	0.41296	0.4429	0.371
25974	1	3	0.79734	0.61666	0.743
5052	1	5	0.36421	0.60523	0.685
10327	1	4	0.030971	0.28571	0.293
4678	1	10	0.8388	0.52908	0.667
149483	1	8	0.8036	0.54249	0.663
60313	1	9	0.51382	0.58744	0.633
3652	1	1	0.41702	0.41702	0.399
23139	1	36	0.61855	0.86104	0.691
8503	1	9	0.87482	0.83188	0.836
10103	1	3	0.51112	0.65525	0.578
55624	1	1	0.038393	0.038393	0.031
541468	1	1	0.038393	0.038393	0.031
8438	1	2	0.0067812	0.0045339	0.0068
7388	1	2	0.52835	0.60532	0.458
387338	1	10	0.044717	0.54974	0.558
2166	1	5	0.1246	0.38707	0.081
127343	1	6	0.52232	0.50344	0.604
148930	1	2	0.23572	0.10678	0.196
8569	1	5	0.037742	0.39301	0.514
64756	1	8	0.12031	0.0055716	0.016
374973	1	6	0.11091	0.0057152	0.016
9813	1	15	0.16037	0.0066434	0.015
1580	1	8	0.41992	0.36452	0.328
1579	1	1	0.78113	0.78113	0.789
260293	1	8	0.20933	0.28757	0.207
199974	1	5	0.67617	0.74182	0.715
284541	1	2	0.40567	0.64799	0.523
10158	1	3	0.6884	0.54671	0.634
6886	1	7	0.79107	0.67785	0.635
6491	1	12	0.35089	0.85629	0.788
51727	1	2	0.72621	0.70771	0.717
2301	1	3	0.90748	0.89225	0.968
2306	1	3	0.47406	0.54559	0.644
388630	1	62	0.11901	0.011598	0.082
200010	1	5	0.29567	0.21946	0.181
54558	1	11	0.43367	0.6494	0.742
84871	1	159	0.20026	0.092762	0.497
79656	1	13	0.12348	0.46116	0.421
1996	1	11	0.17729	0.022607	0.114
11124	1	20	0.010933	0.0054654	0.00076
1031	1	2	0.038772	0.064767	0.065
284546	1	1	0.27926	0.27926	0.247
26994	1	1	0.2745	0.2745	0.269
22996	1	6	0.059352	0.072021	0.018
2060	1	5	0.81949	0.39025	0.561
4898	1	4	0.91779	0.74883	0.816
5865	1	9	0.20992	0.0244	0.042
51060	1	4	0.32158	0.29477	0.359
112970	1	1	0.29567	0.29567	0.295
91408	1	1	0.91069	0.91069	0.901
9372	1	9	0.44016	0.18299	0.296
200014	1	3	0.70964	0.3982	0.441
4998	1	3	0.36566	0.26642	0.207
84950	1	2	0.28873	0.33936	0.223
23318	1	7	0.48011	0.55857	0.413
2882	1	6	0.44131	0.47497	0.455
348378	1	6	0.94651	0.86922	0.876
65260	1	3	0.44168	0.75562	0.784
79699	1	13	0.064235	0.71164	0.163
440590	1	8	0.79159	0.77593	0.829
55268	1	1	0.45942	0.45942	0.466
6342	1	22	0.65044	0.36382	0.459
127435	1	10	0.5601	0.35111	0.442
6512	1	14	0.32972	0.20614	0.32
4116	1	2	0.25101	0.12106	0.14
7804	1	10	0.19307	0.16019	0.17
63948	1	8	0.64236	0.19861	0.23
148979	1	42	0.11432	0.74643	0.856
55706	1	7	0.50363	0.89234	0.931
54432	1	12	0.54321	0.51863	0.68
1733	1	7	0.5809	0.43872	0.471
51668	1	3	0.059184	0.03567	0.018
115353	1	2	0.020603	0.029885	0.0108
388633	1	5	0.0023403	0.081705	0.00062
9528	1	5	0.11937	0.057886	0.066
127428	1	5	0.36521	0.12575	0.096
200008	1	9	0.028327	0.26507	0.298
606495	1	4	0.4741	0.1892	0.329
51253	1	3	0.23826	0.90879	0.928
23648	1	29	0.31076	0.76252	0.795
26027	1	16	0.0026729	0.44505	0.124
338094	1	1	0.66523	0.66523	0.689
374977	1	19	0.9784	0.88295	0.752
7268	1	9	0.92398	0.82525	0.85
25973	1	8	0.54523	0.79832	0.556
55001	1	4	0.29252	0.18476	0.377
163747	1	8	0.65539	0.64315	0.561
1718	1	15	0.47739	0.30992	0.237
199964	1	9	0.70761	0.79961	0.73
7809	1	6	0.7217	0.77986	0.949
255738	1	7	0.88272	0.94883	0.613
23358	1	16	0.9837	0.79947	0.954
8613	1	22	0.94243	0.65924	0.726
5563	1	11	0.26991	0.63702	0.773
199920	1	34	0.10835	0.036881	0.047
731	1	28	0.095907	0.92817	0.794
732	1	14	0.45333	0.13282	0.108
1600	1	316	0.031967	0.50289	0.627
115209	1	28	0.11463	0.59579	0.185
4070	1	6	0.20038	0.26608	0.369
114803	1	18	0.11975	0.043183	0.041
3725	1	7	0.59655	0.4772	0.19
55277	1	60	0.11053	0.2232	0.31
51361	1	11	0.76681	0.78316	0.603
1573	1	7	0.7477	0.41811	0.606
127795	1	26	0.53608	0.41759	0.765
4774	1	77	0.6513	0.7365	0.935
83941	1	5	0.9637	0.60013	0.705
10207	1	63	0.091132	0.042171	0.109
54596	1	6	0.32668	0.16487	0.388
163782	1	32	0.21788	0.76697	0.958
7398	1	5	0.00054139	0.0011797	0.00068
85440	1	10	0.041676	0.0029318	0.0024
84938	1	17	0.80989	0.61768	0.676
100996301	1	1	0.95686	0.95686	0.962
27022	1	1	0.95686	0.95686	0.962
29929	1	12	0.63749	0.4869	0.619
23421	1	9	0.3027	0.24145	0.259
84455	1	7	0.042188	0.12513	0.044
5236	1	23	0.0020978	0.037374	0.00026
4919	1	77	0.79624	0.91465	0.632
148581	1	14	0.29467	0.67604	0.371
57685	1	41	0.88507	0.89701	0.971
55225	1	13	0.24207	0.163	0.096
3716	1	30	0.61992	0.66515	0.216
205	1	13	0.52399	0.27173	0.5
9829	1	27	0.48841	0.69019	0.03
54741	1	7	0.70656	0.81869	0.837
3953	1	46	0.15352	0.54203	0.641
5142	1	125	0.01024	0.15655	0.045
84251	1	90	0.038877	0.060423	0.04
200132	1	8	0.28261	0.11973	0.146
10022	1	4	0.72266	0.69387	0.645
79819	1	15	0.017177	0.0052852	0.036
57708	1	11	0.37166	0.045669	0.148
23169	1	15	0.0011285	0.053601	0.14
400757	1	20	3.4145e-09	0.12263	5e-06
149233	1	16	1.2577e-19	1.2086e-11	0
3595	1	16	8.8871e-05	0.0014248	0.00012
26135	1	4	0.033455	0.027978	0.079
1647	1	4	0.23232	0.40503	0.481
55970	1	32	0.6893	0.18824	0.418
9077	1	4	0.092115	0.34241	0.303
79971	1	32	0.25864	0.43855	0.115
6121	1	9	0.982	0.78985	0.944
55635	1	9	0.18715	0.39596	0.363
57554	1	55	0.30299	0.0048892	0.062
55631	1	4	0.017124	0.0025029	0.017
9295	1	2	0.048911	0.067226	0.025
1491	1	5	0.65183	0.84268	0.93
5733	1	50	0.9039	0.54735	0.436
9406	1	4	0.31863	0.25088	0.345
257194	1	89	0.18775	0.25928	0.369
127255	1	12	0.019624	0.24753	0.161
8790	1	2	0.34341	0.36544	0.28
100526835	1	46	0.066622	0.66712	0.828
51086	1	44	0.051006	0.67196	0.799
127254	1	12	0.19345	0.10206	0.166
1429	1	2	0.73049	0.79061	0.687
431707	1	2	0.44126	0.34814	0.542
204962	1	61	0.11973	0.37779	0.311
34	1	13	0.92905	0.97466	0.986
5876	1	5	0.052863	0.77118	0.674
4438	1	19	0.67117	0.88436	0.904
127247	1	6	0.70222	0.69532	0.574
256435	1	118	0.40573	0.7299	0.874
81849	1	36	3.7333e-05	0.59902	0.0022
10026	1	12	2.5727e-05	0.51774	0.096
26289	1	72	0.28254	0.29919	0.45
26009	1	4	0.30286	0.27599	0.155
23032	1	5	0.43091	0.71151	0.723
374986	1	3	0.75915	0.62441	0.697
91624	1	4	0.51627	0.72918	0.806
8880	1	2	0.79624	0.89835	0.89
54810	1	12	0.22699	0.75169	0.785
5737	1	10	0.0052275	0.00069591	0.0013
10964	1	7	0.88323	0.43384	0.691
10561	1	5	0.84336	0.75534	0.844
64123	1	17	0.035909	0.64868	0.654
23266	1	28	0.22502	0.098326	0.212
79739	1	22	0.36063	0.56996	0.387
5567	1	18	0.59039	0.75393	0.838
148418	1	8	0.1244	0.49173	0.29
58511	1	11	0.94736	0.97587	0.971
80135	1	5	0.24083	0.24651	0.122
2787	1	4	0.75386	0.45249	0.584
100505741	1	4	0.36694	0.18554	0.188
1486	1	5	0.34396	0.097006	0.15
117178	1	10	0.19849	0.87346	0.85
23566	1	21	0.76266	0.80838	0.822
255231	1	30	0.07932	0.43782	0.501
55283	1	5	0.63653	0.3171	0.427
126820	1	17	0.8259	0.6358	0.79
84144	1	8	0.6037	0.90752	0.902
148423	1	6	0.65326	0.80623	0.793
8915	1	4	0.83807	0.52013	0.65
23576	1	50	0.44252	0.85066	0.83
3491	1	1	0.85306	0.85306	0.863
54680	1	12	0.51737	0.3534	0.392
255631	1	67	0.80509	0.84456	0.875
57489	1	7	0.90611	0.50746	0.563
9635	1	11	0.6601	0.34444	0.467
1179	1	20	0.93195	0.72512	0.772
22802	1	9	0.26038	0.37481	0.625
51100	1	3	0.39158	0.53425	0.355
9403	1	7	0.97076	0.95319	0.982
9653	1	21	0.18101	0.85493	0.993
8543	1	2	0.10249	0.068234	0.182
5586	1	24	0.39487	0.47673	0.598
2959	1	5	0.38154	0.46334	0.54
56267	1	7	0.05372	0.13399	0.334
494115	1	3	0.31925	0.33815	0.54
2635	1	5	0.17018	0.1803	0.101
2633	1	5	0.71338	0.31051	0.32
2634	1	2	0.17918	0.090526	0.084
388646	1	6	0.25509	0.10705	0.132
115361	1	6	0.33776	0.21733	0.24
115362	1	3	0.019757	0.1534	0.061
163351	1	8	0.63442	0.47386	0.592
23507	1	17	0.57358	0.7283	0.751
84230	1	17	0.093363	0.13779	0.061
55144	1	10	0.018023	0.072933	0.023
284695	1	4	0.77055	0.44706	0.745
84146	1	5	0.91279	0.83268	0.944
164045	1	9	0.58927	0.46071	0.541
8317	1	5	0.71408	0.70504	0.692
7049	1	63	0.02179	0.18773	0.233
676	1	11	0.75934	0.54106	0.672
253152	1	1	0.69699	0.69699	0.654
284697	1	7	0.65619	0.34819	0.362
388649	1	1	0.22183	0.22183	0.205
79871	1	7	0.10528	0.31992	0.061
2672	1	5	0.09656	0.50596	0.597
7813	1	25	0.25468	0.48178	0.368
6125	1	3	0.34347	0.34892	0.438
388650	1	16	0.30525	0.58063	0.426
22823	1	4	0.61805	0.57246	0.621
50999	1	4	0.28475	0.30418	0.169
343099	1	10	0.54149	0.20136	0.279
1810	1	2	0.12534	0.060476	0.059
54874	1	5	0.49932	0.15707	0.249
8412	1	52	0.92912	0.56128	0.277
30836	1	9	0.72975	0.43432	0.511
2730	1	7	0.4334	0.36755	0.453
24	1	42	0.096808	0.39051	0.121
9411	1	9	0.43316	0.417	0.288
5825	1	5	0.003859	0.027517	0.025
2152	1	3	0.66734	0.3424	0.427
126969	1	31	0.81039	0.42938	0.612
1266	1	8	0.5451	0.22367	0.272
199857	1	15	0.47464	0.066199	0.098
148534	1	6	0.2147	0.45144	0.348
100527978	1	14	0.10815	0.53867	0.481
25950	1	4	0.70364	0.49754	0.552
58155	1	14	0.46572	0.63674	0.796
1806	1	72	0.3066	0.1092	0.404
51375	1	19	0.0041618	0.026319	0.029
163404	1	34	0.29674	0.86644	0.41
9890	1	13	0.19392	0.67817	0.773
54873	1	14	0.54555	0.68792	0.28
391059	1	16	0.64591	0.37724	0.614
178	1	17	0.85129	0.96929	0.967
23443	1	3	0.77868	0.76763	0.702
64645	1	4	0.5875	0.50084	0.636
163786	1	3	0.6619	0.69545	0.748
54482	1	1	0.3101	0.3101	0.325
127495	1	4	0.69908	0.46557	0.559
1629	1	8	0.9701	0.48802	0.744
8634	1	5	0.63969	0.70267	0.749
8556	1	13	0.9413	0.61196	0.647
54112	1	3	0.72661	0.68991	0.626
7412	1	6	0.26742	0.15997	0.153
2135	1	2	0.69848	0.77869	0.877
148867	1	6	0.75514	0.63497	0.81
51611	1	5	0.54343	0.58687	0.655
1901	1	1	0.32341	0.32341	0.297
118427	1	49	0.54428	0.97244	0.85
1301	1	28	0.18818	0.094131	0.041
55599	1	2	0.014552	0.020429	0.0102
280	1	3	0.0061242	0.0026094	0.0106
278	1	1	0.017976	0.017976	0.014
55170	1	2	0.33476	0.35053	0.277
22854	1	60	0.69955	0.85445	0.714
10451	1	88	0.21969	0.035343	0.207
29957	1	12	0.14763	0.020268	0.013
284611	1	10	0.068981	0.67142	0.2
113802	1	1	0.7522	0.7522	0.757
163479	1	4	0.57958	0.52684	0.712
6814	1	17	0.44844	0.64216	0.746
254268	1	13	0.34339	0.39996	0.292
29899	1	6	0.043054	0.18549	0.117
23155	1	11	0.6354	0.4095	0.218
22911	1	7	0.57116	0.66926	0.731
6884	1	1	0.94032	0.94032	0.961
127003	1	1	0.59768	0.59768	0.584
57535	1	16	0.0035069	0.25139	0.483
6301	1	8	0.040131	0.36223	0.501
1952	1	3	0.72338	0.43438	0.564
84722	1	3	0.66543	0.56287	0.548
343263	1	3	0.67839	0.7039	0.566
6272	1	7	0.77032	0.8305	0.691
5686	1	5	0.93508	0.94157	0.95
284612	1	5	0.98233	0.96612	0.992
127002	1	2	0.98404	0.96895	0.984
284613	1	5	0.82757	0.90188	0.766
57463	1	8	0.79737	0.82937	0.809
83873	1	4	0.96924	0.8858	0.898
2773	1	5	0.79826	0.90097	0.968
2780	1	2	0.95855	0.95106	0.947
271	1	2	0.9787	0.98197	0.969
2949	1	1	0.29899	0.299	0.292
2947	1	2	0.55646	0.62717	0.519
79574	1	3	0.80648	0.83714	0.846
1435	1	12	0.18601	0.061575	0.106
10768	1	4	0.02128	0.011013	0.014
85369	1	6	0.0065479	0.073482	0.0088
257	1	6	0.022444	0.16691	0.01
164153	1	10	0.32704	0.8817	0.731
388662	1	10	0.22703	0.034612	0.061
3749	1	4	0.010208	0.01596	0.069
64783	1	2	0.69595	0.77883	0.703
9122	1	5	0.51105	0.12	0.281
10542	1	2	0.39234	0.46696	0.341
84432	1	6	0.87127	0.70805	0.593
3744	1	5	0.97824	0.97441	0.963
3737	1	9	0.79958	0.51718	0.672
3738	1	1	0.33378	0.33378	0.334
963	1	10	0.74646	0.87688	0.935
55791	1	1	0.63814	0.63814	0.635
128338	1	10	0.86317	0.94966	0.742
10390	1	12	0.63488	0.64896	0.795
79961	1	6	0.36913	0.39846	0.367
1117	1	20	0.91583	0.9161	0.966
27159	1	27	0.025832	0.0072458	0.034
128344	1	13	0.13669	0.20121	0.142
5016	1	12	0.035737	0.078254	0.073
79084	1	3	0.13657	0.074865	0.113
515	1	2	0.063208	0.068505	0.052
128346	1	3	0.062003	0.14383	0.071
140	1	19	0.058259	0.12111	0.184
5906	1	20	0.97425	0.95192	0.777
55924	1	9	0.93941	0.98	0.864
11218	1	7	0.77817	0.97332	0.921
3752	1	61	0.462	0.91744	0.772
643355	1	7	0.11218	0.16576	0.233
55917	1	11	0.32604	0.67567	0.504
7482	1	9	0.98307	0.98944	0.987
54879	1	11	0.36027	0.72176	0.611
829	1	4	0.085934	0.52122	0.305
4343	1	5	0.30762	0.080686	0.11
389	1	3	0.12298	0.07206	0.077
333926	1	3	0.12298	0.07206	0.077
284467	1	1	0.25089	0.25089	0.257
6566	1	2	0.54701	0.54943	0.538
9860	1	6	0.71415	0.60282	0.717
260425	1	29	0.62307	0.41098	0.436
10745	1	2	0.0057385	0.0058619	0.003
54665	1	4	0.023977	0.013877	0.0038
26191	1	6	0.55429	0.11854	0.302
440603	1	6	0.19831	0.059659	0.112
10717	1	4	0.084549	0.13813	0.062
64858	1	2	0.085078	0.24607	0.17
204851	1	6	0.048284	0.036866	0.066
56944	1	5	0.094245	0.058387	0.116
148281	1	21	0.010741	0.11074	0.118
51592	1	5	0.29298	0.87463	0.836
10286	1	3	0.91257	0.80527	0.922
163259	1	4	0.95951	0.8931	0.916
270	1	5	0.79888	0.8574	0.876
4893	1	4	0.87361	0.87248	0.937
7812	1	4	0.87361	0.87248	0.937
80143	1	1	0.84009	0.84009	0.847
6847	1	14	0.50319	0.72041	0.352
7252	1	3	0.742	0.87313	0.841
10100	1	28	0.39824	0.95452	0.91
4803	1	21	0.33838	0.21964	0.035
81839	1	18	0.61393	0.83964	0.736
845	1	19	0.4241	0.8326	0.706
4808	1	8	0.91137	0.86066	0.957
55356	1	17	0.69756	0.22585	0.236
126868	1	6	0.24103	0.46518	0.356
476	1	11	0.50502	0.3597	0.573
965	1	2	0.43045	0.28126	0.29
3321	1	3	0.88304	0.68019	0.83
914	1	2	0.94242	0.88876	0.927
5738	1	21	0.75923	0.8138	0.99
9398	1	7	0.45237	0.34371	0.257
8458	1	7	0.85438	0.78215	0.868
80263	1	3	0.404	0.39229	0.35
79679	1	21	0.4397	0.60631	0.654
10905	1	19	0.043114	0.013115	0.102
54855	1	21	0.65519	0.19396	0.232
54834	1	6	0.23468	0.63342	0.336
10885	1	3	0.54766	0.66335	0.526
200162	1	24	0.043084	0.2194	0.441
6913	1	25	0.36431	0.4294	0.574
10352	1	8	0.41406	0.50114	0.57
51179	1	8	0.92205	0.83199	0.934
3284	1	7	0.78906	0.66574	0.693
3283	1	3	0.09557	0.57904	0.602
90874	1	8	0.12416	0.69471	0.372
26227	1	14	0.44011	0.18462	0.126
3158	1	8	0.1881	0.19492	0.073
83998	1	5	0.22075	0.136	0.064
11085	1	1	0.03468	0.034681	0.042
4853	1	10	0.19215	0.069323	0.12
9659	1	4	0.87933	0.76404	0.828
148738	1	1	0.75787	0.75788	0.755
84265	1	1	0.71236	0.71236	0.728
284615	1	1	0.71236	0.71236	0.728
128077	1	1	0.71236	0.71236	0.728
8515	1	2	0.10894	0.06154	0.103
148741	1	5	0.0020526	0.023549	0.022
10401	1	3	0.41445	0.32706	0.287
200035	1	1	0.99802	0.99802	0.998
10623	1	2	0.93591	0.98295	0.995
27246	1	9	0.14321	0.1083	0.073
11126	1	2	0.4038	0.46749	0.357
5174	1	2	0.46641	0.46905	0.387
5565	1	6	0.14152	0.3715	0.45
2330	1	16	0.34582	0.32432	0.488
9557	1	18	0.57342	0.33784	0.21
607	1	16	0.32653	0.55445	0.646
51205	1	7	0.66706	0.7606	0.564
2702	1	12	0.0039079	0.0046564	0.024
2703	1	4	0.66311	0.74912	0.568
51027	1	1	0.7826	0.7826	0.791
9900	1	3	0.06613	0.060195	0.08
10262	1	3	0.042561	0.01548	0.042
10903	1	2	0.051637	0.024966	0.025
56957	1	3	0.068333	0.17857	0.074
11311	1	1	0.52055	0.52055	0.547
23632	1	1	0.62858	0.62858	0.625
51107	1	1	0.62858	0.62858	0.625
79630	1	1	0.91216	0.91216	0.898
148523	1	1	0.91216	0.91216	0.898
54460	1	2	0.44737	0.52669	0.402
9129	1	1	0.35087	0.35087	0.343
23248	1	8	0.15615	0.67577	0.716
80222	1	4	0.091433	0.61503	0.603
1893	1	1	0.45557	0.45557	0.469
2029	1	4	0.84101	0.71283	0.721
55204	1	10	0.61411	0.37098	0.559
84072	1	4	0.3028	0.30767	0.304
1520	1	3	0.46833	0.64128	0.527
1513	1	2	0.42491	0.52552	0.499
405	1	4	0.13183	0.29048	0.237
9869	1	4	0.5142	0.42235	0.592
29956	1	5	0.45298	0.45597	0.604
8416	1	3	0.74216	0.60983	0.819
55793	1	1	0.64161	0.64161	0.615
58497	1	6	0.66544	0.8678	0.815
149428	1	6	0.59033	0.6816	0.695
54964	1	3	0.53103	0.43356	0.451
56882	1	4	0.16528	0.52526	0.466
10962	1	1	0.87209	0.87209	0.907
126626	1	2	0.98517	0.98661	0.986
10500	1	1	0.5791	0.57911	0.587
8394	1	1	0.012067	0.012067	0.0132
5710	1	2	0.042605	0.14743	0.111
57592	1	1	0.086342	0.086342	0.097
8991	1	4	0.2144	0.042685	0.049
5692	1	2	0.44577	0.53767	0.412
23126	1	5	0.69011	0.74079	0.45
57530	1	9	0.27768	0.21071	0.351
7286	1	8	0.02237	0.016948	0.071
81609	1	2	0.46786	0.26465	0.231
11189	1	1	0.073231	0.073231	0.072
284485	1	1	0.073231	0.073231	0.072
51686	1	1	0.012028	0.012028	0.0102
11022	1	5	0.037787	0.013172	0.034
339398	1	2	0.018763	0.0082258	0.029
6097	1	4	0.018114	0.002573	0.056
100191040	1	6	0.046325	0.082025	0.148
284486	1	8	0.35991	0.052864	0.06
117145	1	11	0.94412	0.38937	0.6
6281	1	13	0.70159	0.3045	0.257
6282	1	4	0.49527	0.72695	0.863
100131107	1	2	0.39214	0.24252	0.388
126637	1	1	0.23664	0.23664	0.237
126638	1	3	0.25409	0.36599	0.347
388697	1	7	0.22871	0.67401	0.677
2312	1	1	0.70167	0.70167	0.713
388698	1	3	0.38372	0.38874	0.308
49860	1	4	0.95606	0.74631	0.753
254910	1	4	0.52824	0.17655	0.232
54544	1	3	0.4926	0.24435	0.297
353145	1	5	0.69629	0.31512	0.469
84648	1	1	0.15803	0.15803	0.151
353143	1	11	0.004853	0.091507	0.021
353142	1	16	0.0093117	0.13523	0.023
353141	1	2	0.21096	0.085445	0.079
26239	1	1	0.28893	0.28893	0.281
353139	1	2	0.069279	0.059794	0.048
199834	1	5	0.065238	0.064105	0.101
100129271	1	6	0.14494	0.16567	0.171
448834	1	5	0.12815	0.21792	0.064
353137	1	8	0.10705	0.069232	0.04
353135	1	8	0.29443	0.068798	0.044
353134	1	6	0.18851	0.056543	0.038
353133	1	6	0.10408	0.041628	0.045
353132	1	6	0.10408	0.041628	0.045
353131	1	1	0.49693	0.49693	0.466
4184	1	1	0.84603	0.84603	0.83
3713	1	2	0.83007	0.83038	0.832
163778	1	6	0.029354	0.040269	0.035
6698	1	6	0.014136	0.048282	0.033
6707	1	8	0.018004	0.099554	0.031
6699	1	7	0.0020732	0.24832	0.039
6703	1	5	0.0030009	0.1859	0.028
6700	1	2	0.60766	0.33057	0.357
6701	1	3	0.0055326	0.01437	0.0098
6706	1	3	0.27587	0.084036	0.111
149018	1	6	0.81733	0.70182	0.832
574414	1	13	0.9394	0.77279	0.893
4014	1	3	0.72526	0.77298	0.76
114771	1	6	0.6095	0.14298	0.15
57115	1	17	0.32993	0.26013	0.388
6280	1	7	0.52242	0.40317	0.571
6283	1	3	0.8676	0.63967	0.857
6279	1	3	0.89456	0.65011	0.777
338324	1	4	0.59291	0.57707	0.533
645922	1	4	0.77637	0.61173	0.551
6277	1	1	0.14358	0.14358	0.141
6276	1	1	0.14358	0.14358	0.141
6275	1	1	0.14358	0.14358	0.141
6274	1	1	0.14358	0.14358	0.141
6273	1	2	0.66341	0.67275	0.59
6284	1	1	0.42615	0.42615	0.452
6271	1	1	0.42615	0.42615	0.452
26097	1	4	0.39556	0.47651	0.609
23557	1	1	0.41395	0.41395	0.429
3608	1	1	0.41395	0.41395	0.429
4881	1	3	0.61707	0.54663	0.461
65123	1	4	0.017083	0.011318	0.015
11000	1	2	0.40318	0.33761	0.427
57459	1	16	0.047981	0.3146	0.048
9909	1	1	0.32078	0.32078	0.326
200186	1	2	0.43808	0.3227	0.504
27173	1	2	0.43808	0.3227	0.504
148327	1	1	0.29572	0.29572	0.304
6232	1	1	0.30652	0.30652	0.322
91181	1	11	0.010254	0.069597	0.0114
7170	1	3	0.021948	0.052625	0.158
25912	1	3	0.0039283	0.0012064	0.0046
9898	1	8	0.004801	0.011094	0.0068
10456	1	2	0.0061213	0.11191	0.051
89872	1	2	0.42841	0.30157	0.309
57198	1	5	0.022373	0.10506	0.109
3570	1	9	0.004499	0.0097705	0.012
126669	1	2	0.0042096	0.0010788	0.0046
126668	1	8	0.01426	0.00089756	0.0038
55585	1	5	0.013905	0.0010509	0.0054
1141	1	5	0.59067	0.19642	0.355
103	1	10	0.74148	0.20967	0.317
3782	1	41	0.13364	0.19359	0.675
10654	1	2	0.33155	0.35639	0.273
57326	1	1	0.14026	0.14026	0.161
6464	1	1	0.021464	0.021463	0.027
1163	1	1	0.021464	0.021463	0.027
80308	1	1	0.021464	0.021463	0.027
127579	1	1	0.6277	0.6277	0.616
149095	1	1	0.6277	0.6277	0.616
1944	1	1	0.32284	0.32284	0.334
200185	1	1	0.65144	0.65144	0.641
80128	1	1	0.65144	0.65144	0.641
2629	1	2	0.57662	0.44453	0.452
10712	1	1	0.46735	0.46735	0.476
57657	1	1	0.24785	0.24785	0.244
5313	1	2	0.21956	0.18073	0.154
2224	1	2	0.059143	0.2009	0.141
284618	1	1	0.30313	0.30313	0.304
23623	1	1	0.30313	0.30313	0.304
55870	1	4	0.74993	0.31226	0.344
55249	1	1	0.36939	0.36939	0.372
7818	1	2	0.59862	0.35817	0.446
54856	1	1	0.35139	0.35139	0.341
23208	1	3	0.53265	0.43178	0.494
6016	1	2	0.72375	0.43196	0.492
22889	1	2	0.61388	0.46571	0.466
339403	1	1	0.014085	0.014085	0.0102
9181	1	1	0.014085	0.014085	0.0106
6746	1	3	0.40063	0.58377	0.377
56893	1	4	0.5871	0.59687	0.448
28956	1	2	0.54723	0.69246	0.607
57111	1	2	0.54723	0.69246	0.607
92312	1	3	0.80702	0.56699	0.66
4000	1	6	0.78015	0.54807	0.652
64218	1	2	0.36707	0.34588	0.317
9673	1	5	0.015484	0.0022056	0.0044
11243	1	5	0.10245	0.0054668	0.013
100527963	1	5	0.10245	0.0054668	0.013
632	1	3	0.032049	0.017109	0.011
79957	1	3	0.18092	0.20726	0.078
23381	1	7	0.16119	0.69427	0.76
84283	1	1	0.51277	0.51278	0.521
112770	1	2	0.34685	0.1874	0.274
391104	1	2	0.34685	0.1874	0.274
7203	1	8	0.04818	0.17492	0.186
128229	1	3	0.4335	0.29536	0.28
57127	1	4	0.19381	0.10432	0.109
10485	1	4	0.32991	0.45028	0.417
4209	1	7	0.25753	0.2418	0.405
128239	1	8	0.42766	0.058934	0.118
164118	1	4	0.83551	0.85039	0.838
128240	1	8	0.14795	0.75423	0.546
54865	1	8	0.14795	0.75423	0.546
60484	1	1	0.25136	0.25136	0.27
63827	1	4	0.18884	0.18181	0.123
10763	1	2	0.30675	0.40972	0.294
81875	1	1	0.09423	0.09423	0.109
51093	1	1	0.09423	0.09423	0.109
3068	1	2	0.019135	0.013323	0.0142
5546	1	4	0.22955	0.30172	0.228
9047	1	3	0.27309	0.23089	0.267
4914	1	7	0.30517	0.47815	0.609
3645	1	2	0.43012	0.49144	0.376
375033	1	4	0.12928	0.24195	0.131
149499	1	3	0.14532	0.044172	0.098
9826	1	16	0.51206	0.07932	0.184
440695	1	7	0.53103	0.21437	0.318
2117	1	3	0.73019	0.94075	0.983
83416	1	16	0.79442	0.12655	0.228
83417	1	10	0.22715	0.026771	0.127
115352	1	3	0.17096	0.47528	0.337
79368	1	5	0.40391	0.57718	0.363
115350	1	10	0.78721	0.66437	0.538
922	1	2	0.89767	0.88854	0.869
55243	1	33	0.77131	0.43952	0.463
912	1	8	0.048598	0.84239	0.808
910	1	1	0.14206	0.14206	0.144
913	1	2	0.26103	0.37217	0.225
128360	1	8	0.56635	0.48795	0.659
391107	1	3	0.021348	0.0020641	0.0058
391109	1	1	0.088066	0.088066	0.089
343406	1	8	0.019777	0.68809	0.261
391112	1	5	0.7411	0.72949	0.843
128366	1	9	0.30914	0.59217	0.667
128367	1	1	0.10824	0.10824	0.103
128368	1	4	0.48397	0.6125	0.584
6708	1	15	0.050249	0.3119	0.274
81448	1	1	0.12538	0.12538	0.13
391114	1	2	0.069043	0.027534	0.087
128371	1	6	0.57878	0.55547	0.526
128372	1	12	0.49256	0.37445	0.282
81442	1	9	0.15262	0.11159	0.271
4332	1	3	0.37736	0.83616	0.81
149628	1	7	0.25029	0.45148	0.235
3428	1	7	0.21789	0.95205	0.97
9447	1	4	0.7258	0.83983	0.743
57863	1	7	0.032246	0.31425	0.031
2532	1	4	0.79338	0.80878	0.902
2205	1	4	0.54849	0.33637	0.313
26476	1	4	0.19307	0.38393	0.116
127385	1	3	0.27225	0.76426	0.691
325	1	9	0.8751	0.94999	0.964
1401	1	4	0.6191	0.8264	0.778
54935	1	7	0.60489	0.3361	0.646
343413	1	5	0.99925	0.94317	0.99
56833	1	4	0.80727	0.7951	0.613
284677	1	3	0.65821	0.65826	0.499
391123	1	6	0.81046	0.86476	0.904
25790	1	10	0.68443	0.83351	0.662
8407	1	2	0.20585	0.61018	0.448
57549	1	5	0.15464	0.46516	0.597
89886	1	3	0.2645	0.23011	0.227
93183	1	8	0.82651	0.52229	0.787
3766	1	4	0.64769	0.86048	0.809
3765	1	5	0.89282	0.83371	0.855
93185	1	5	0.92929	0.79942	0.87
477	1	2	0.98005	0.97961	0.982
480	1	13	0.78215	0.62429	0.707
844	1	6	0.68724	0.7653	0.61
8682	1	2	0.6226	0.55676	0.683
50717	1	4	0.49174	0.87524	0.912
5824	1	2	0.28147	0.55915	0.502
1314	1	9	0.54813	0.50006	0.216
23385	1	9	0.73839	0.39246	0.225
4807	1	7	0.4438	0.76205	0.731
57216	1	9	0.72229	0.68381	0.844
114836	1	9	0.92412	0.93998	0.896
8832	1	11	0.14449	0.62991	0.746
6504	1	15	0.042339	0.42423	0.498
962	1	9	0.087875	0.0012101	0.0114
57823	1	4	0.72514	0.95887	0.953
4063	1	8	0.95495	0.76502	0.765
51744	1	7	0.65007	0.5305	0.405
55600	1	1	0.00030522	0.00030522	0.0004
142683	1	4	0.042138	0.078939	0.221
50848	1	6	0.0022338	0.52746	0.31
100131187	1	3	0.4141	0.47331	0.364
7391	1	3	0.4141	0.47331	0.364
257106	1	4	0.72539	0.6762	0.502
81607	1	3	0.18768	0.21519	0.378
126823	1	1	0.89233	0.89233	0.87
5202	1	3	0.92285	0.83858	0.714
4817	1	2	0.78604	0.78454	0.71
9191	1	2	0.78604	0.78454	0.71
51506	1	1	0.35746	0.35746	0.332
27005	1	1	0.52148	0.52148	0.509
5498	1	1	0.52148	0.52148	0.509
8703	1	1	0.52148	0.52148	0.509
9507	1	3	0.43239	0.36722	0.348
4720	1	7	0.83908	0.52339	0.63
2207	1	5	0.8647	0.76884	0.896
336	1	5	0.73137	0.8444	0.898
84134	1	5	0.73137	0.8444	0.898
9970	1	6	0.59948	0.85353	0.886
654790	1	6	0.20683	0.55707	0.083
4359	1	2	0.86865	0.83685	0.899
6391	1	5	0.62703	0.6763	0.427
257177	1	4	0.51375	0.65657	0.424
2212	1	3	0.51004	0.40492	0.543
84824	1	9	0.24817	0.63852	0.515
127943	1	11	0.72771	0.53427	0.515
11266	1	6	0.18483	0.47257	0.126
22926	1	49	0.97545	0.91671	0.944
25903	1	21	0.14165	0.67438	0.536
9722	1	99	0.21495	0.93498	0.94
284680	1	10	0.91672	0.64247	0.719
400793	1	11	0.95411	0.51405	0.708
117157	1	10	0.39849	0.54656	0.78
127933	1	2	0.56627	0.35133	0.37
6675	1	6	0.80844	0.60264	0.478
4921	1	38	0.74644	0.03778	0.038
339512	1	12	0.69892	0.91632	0.795
5999	1	9	0.40056	0.57872	0.453
8490	1	48	0.24845	0.051416	0.124
83540	1	19	0.43987	0.020824	0.049
5087	1	58	0.27873	0.13651	0.065
4009	1	43	0.074607	0.09559	0.043
6258	1	27	0.13689	0.3459	0.45
440699	1	20	0.38448	0.78148	0.932
4259	1	10	0.39412	0.45995	0.428
223	1	14	0.53852	0.60677	0.501
54499	1	9	0.57449	0.16048	0.221
7371	1	23	0.45865	0.13316	0.281
149297	1	24	0.074539	0.061721	0.142
57645	1	7	0.048524	0.38934	0.035
117143	1	8	0.079051	0.43076	0.039
387597	1	14	0.47976	0.052899	0.139
84944	1	9	0.49716	0.080641	0.117
10223	1	14	0.94949	0.9012	0.889
92235	1	18	0.84211	0.32029	0.572
5451	1	24	0.17767	0.087066	0.0046
919	1	23	0.059565	0.16723	0.074
8804	1	13	0.88348	0.8402	0.91
92241	1	14	0.2986	0.50318	0.546
9019	1	19	0.60458	0.54693	0.331
55811	1	14	0.47714	0.70411	0.719
25874	1	2	0.56646	0.37754	0.394
55827	1	7	0.94145	0.64964	0.663
23432	1	5	0.92967	0.70451	0.786
261726	1	5	0.45304	0.72959	0.796
375035	1	2	0.80342	0.60085	0.738
9095	1	7	0.29546	0.50336	0.188
6846	1	4	0.54898	0.14524	0.215
6375	1	8	0.69423	0.43156	0.558
1805	1	25	0.090247	0.3386	0.483
481	1	21	0.015577	0.2138	0.097
29922	1	58	0.46124	0.62194	0.503
8548	1	8	0.49867	0.13798	0.223
57821	1	8	0.37954	0.1955	0.239
10560	1	5	0.78045	0.68634	0.615
2153	1	36	0.14572	0.26673	0.638
6403	1	20	0.50334	0.73913	0.685
6402	1	17	0.019516	0.041468	0.041
6401	1	17	0.019599	0.039925	0.029
92342	1	8	0.082147	0.0033647	0.042
55732	1	22	0.24212	0.14773	0.115
57147	1	16	0.066319	0.36868	0.453
22920	1	29	5.0787e-05	0.10865	0.0038
149281	1	5	0.84022	0.8729	0.713
92344	1	5	0.88499	0.64314	0.752
5396	1	5	0.40428	0.15575	0.18
80133	1	10	0.58239	0.81393	0.483
2328	1	13	0.40014	0.52904	0.647
2327	1	15	0.24697	0.59491	0.395
2326	1	9	0.42504	0.49174	0.176
2329	1	3	0.45403	0.58654	0.692
23215	1	20	0.73665	0.44758	0.499
4653	1	5	0.95779	0.96453	0.973
8674	1	17	0.58576	0.92876	0.956
51603	1	12	0.49471	0.54944	0.481
26052	1	90	0.0071829	0.51479	0.386
92346	1	12	0.51481	0.040683	0.048
5279	1	2	0.028768	0.04027	0.017
51430	1	6	0.23321	0.26629	0.239
356	1	2	0.41628	0.24235	0.264
8995	1	1	0.48786	0.48786	0.463
7292	1	9	0.21887	0.24466	0.234
9588	1	1	0.33747	0.33747	0.355
284525	1	16	0.14119	0.74376	0.568
339416	1	3	0.27172	0.68293	0.638
730159	1	2	0.86876	0.73074	0.747
27252	1	1	0.66744	0.66745	0.653
91687	1	2	0.73845	0.65985	0.781
55157	1	3	0.32173	0.88282	0.815
84614	1	9	0.77317	0.31143	0.37
462	1	13	0.21029	0.45367	0.38
149041	1	4	0.54927	0.81808	0.792
9910	1	49	0.48341	0.72685	0.636
27101	1	3	0.2763	0.14795	0.29
63931	1	1	0.35748	0.35748	0.361
63923	1	25	0.5371	0.39596	0.448
9674	1	20	0.0079901	0.84006	0.769
7143	1	132	0.088277	0.86037	0.969
64326	1	18	0.99558	0.77223	0.898
60676	1	62	0.55024	0.96254	0.916
460	1	76	0.40355	0.64667	0.791
57795	1	23	0.7788	0.48226	0.641
89866	1	17	0.31643	0.27598	0.502
9462	1	18	0.18743	0.396	0.511
84066	1	8	0.25003	0.41179	0.355
55103	1	15	0.324	0.072459	0.038
9068	1	2	0.84386	0.80768	0.847
9917	1	11	0.78459	0.59703	0.549
64222	1	8	0.59451	0.57372	0.548
27	1	13	0.75489	0.51576	0.618
6646	1	8	0.0809	0.17984	0.151
126859	1	34	0.31897	0.31879	0.612
7827	1	9	0.64345	0.96666	0.939
163589	1	19	0.96602	0.98249	0.875
148753	1	19	0.48719	0.52098	0.81
163590	1	8	0.78202	0.43433	0.542
26092	1	8	0.93723	0.68315	0.824
9857	1	13	0.094423	0.17016	0.408
5768	1	11	0.31357	0.22324	0.112
89884	1	14	0.13645	0.035272	0.088
84320	1	18	0.25308	0.22323	0.094
9213	1	23	0.15232	0.59821	0.092
57710	1	5	0.74621	0.80336	0.673
10228	1	16	0.70894	0.65924	0.689
3140	1	10	0.07852	0.19449	0.11
51278	1	3	0.21189	0.22028	0.137
777	1	74	0.13632	0.10332	0.248
127665	1	1	0.91583	0.91583	0.926
2752	1	9	0.22556	0.44892	0.397
127670	1	9	0.16497	0.47056	0.402
353299	1	21	0.00037611	0.51537	0.26
6041	1	11	0.90856	0.83921	0.757
6004	1	6	0.29102	0.1792	0.147
85397	1	7	0.50463	0.23322	0.396
80896	1	5	0.0029936	0.023872	0.0092
1660	1	6	0.80387	0.53472	0.521
81626	1	1	0.5453	0.5453	0.545
3915	1	25	0.022788	0.26566	0.37
3918	1	26	0.22421	0.16403	0.19
23057	1	27	0.27499	0.72816	0.769
9887	1	6	0.99278	0.97535	0.99
4688	1	14	0.98568	0.96894	0.975
10092	1	8	0.13897	0.032684	0.055
23179	1	57	0.77142	0.23771	0.268
403314	1	4	0.14313	0.028624	0.051
23127	1	28	0.85142	0.83552	0.708
116461	1	2	0.73547	0.86622	0.846
81563	1	39	0.20689	0.42501	0.464
80267	1	5	0.50684	0.2001	0.259
116496	1	35	0.12475	0.071064	0.016
6045	1	4	0.11165	0.89861	0.965
81627	1	4	0.10759	0.16427	0.099
54823	1	13	0.029092	0.18734	0.189
10625	1	3	0.48977	0.55045	0.688
83872	1	51	0.64534	0.020132	0.115
10216	1	4	0.58891	0.48146	0.433
7175	1	9	0.64918	0.56666	0.553
54953	1	6	0.42711	0.29705	0.499
10896	1	3	0.23325	0.27868	0.383
5132	1	4	0.20105	0.83165	0.808
5743	1	5	0.80867	0.61075	0.885
5321	1	26	0.55821	0.90079	0.962
339479	1	48	0.82094	0.49704	0.847
64407	1	1	0.11003	0.11003	0.115
431704	1	7	0.80195	0.6313	0.797
5996	1	6	0.11831	0.70834	0.654
6003	1	8	0.67581	0.33595	0.331
5997	1	3	0.85015	0.79617	0.881
51377	1	3	0.99975	0.99917	1
6738	1	4	0.95878	0.99329	0.996
51022	1	4	0.90899	0.82113	0.876
79577	1	12	0.68836	0.92216	0.981
8707	1	5	0.84814	0.92897	0.933
343450	1	23	0.026766	0.57711	0.533
3075	1	12	0.33549	0.90958	0.927
10877	1	3	0.54107	0.76266	0.848
3080	1	1	0.41951	0.41951	0.391
81494	1	3	0.56654	0.46161	0.294
2165	1	6	0.83382	0.31345	0.34
259266	1	4	0.44487	0.40827	0.411
360023	1	1	0.35281	0.35281	0.341
23418	1	19	0.35703	0.32577	0.382
163486	1	15	0.20589	0.21481	0.077
388722	1	2	0.24046	0.13652	0.136
56956	1	3	0.74538	0.79918	0.654
140609	1	15	0.72444	0.92488	0.893
127124	1	7	0.53629	0.41615	0.179
5788	1	12	0.13316	0.043021	0.15
2494	1	45	0.33141	0.33941	0.223
339521	1	2	0.61109	0.51462	0.661
23528	1	1	0.31553	0.31553	0.335
9928	1	8	0.076354	0.1299	0.254
83479	1	8	0.2583	0.47111	0.082
23271	1	9	0.23885	0.06262	0.038
2848	1	2	0.37022	0.3874	0.353
55765	1	6	0.0033643	5.6839e-05	0.00012
23046	1	11	0.020368	0.00015194	0.0011
779	1	27	0.3412	0.0059199	0.0096
647219	1	5	0.48374	0.20444	0.319
252839	1	6	0.43712	0.59846	0.748
91156	1	16	0.061914	0.85841	0.76
5317	1	30	0.27851	0.4993	0.561
7139	1	6	0.62898	0.63551	0.578
3898	1	4	0.33331	0.40889	0.553
7135	1	2	0.16373	0.1604	0.328
23612	1	4	0.34272	0.24425	0.445
1465	1	14	0.60175	0.064722	0.044
89796	1	30	0.03276	0.12854	0.072
55705	1	6	0.73118	0.76433	0.599
149345	1	1	0.96408	0.96408	0.973
25802	1	7	0.89131	0.47237	0.429
10440	1	1	0.35905	0.35905	0.367
6051	1	4	0.9186	0.86447	0.864
1999	1	6	0.29262	0.30193	0.236
9283	1	6	0.84194	0.83559	0.748
127829	1	4	0.70458	0.92384	0.728
5778	1	4	0.84831	0.86821	0.863
59352	1	25	0.14706	0.41411	0.512
29089	1	2	0.22219	0.17309	0.176
4660	1	19	0.56747	0.27339	0.394
127833	1	25	0.0013886	0.59179	0.805
10765	1	16	0.10785	0.32278	0.643
5877	1	4	0.70267	0.68161	0.652
59349	1	3	0.25576	0.22595	0.194
51094	1	4	0.18832	0.084527	0.144
51706	1	2	0.10443	0.075864	0.191
92703	1	5	0.80229	0.69515	0.642
8497	1	11	0.77929	0.24604	0.349
4656	1	3	0.36202	0.13742	0.264
134	1	11	0.17844	0.4583	0.518
4608	1	6	0.14605	0.60288	0.386
1116	1	7	0.52396	0.67747	0.412
1118	1	14	0.2894	0.07975	0.23
7832	1	5	0.22351	0.3387	0.141
2331	1	11	0.53737	0.97936	0.99
493	1	21	0.25094	0.5904	0.884
54900	1	2	0.93739	0.88699	0.899
9877	1	12	0.64164	0.92228	0.963
100381270	1	3	0.16355	0.75196	0.782
6635	1	8	0.79019	0.62986	0.782
9580	1	16	0.37367	0.57406	0.713
55224	1	10	0.39397	0.54542	0.104
5972	1	8	0.050395	0.1868	0.084
3814	1	8	0.057313	0.021265	0.069
127845	1	9	0.1734	0.046304	0.124
22874	1	47	0.28019	0.49896	0.232
84919	1	5	0.12676	0.13805	0.239
5287	1	7	0.48223	0.65497	0.25
4194	1	9	0.50663	0.11669	0.197
10446	1	23	0.60152	0.71601	0.798
23114	1	54	0.00025535	0.012904	0.038
6900	1	15	0.27105	0.61815	0.738
388730	1	7	0.87258	0.70214	0.837
5929	1	15	0.9614	0.84764	0.915
25778	1	11	0.87146	0.91844	0.747
9911	1	12	0.65448	0.94026	0.906
81788	1	5	0.98126	0.77629	0.844
55220	1	5	0.76872	0.50166	0.587
93273	1	3	0.50022	0.56476	0.381
5129	1	11	0.095874	0.78353	0.745
148808	1	8	0.3054	0.42561	0.523
2005	1	7	0.17394	0.4224	0.483
85414	1	4	0.26636	0.28244	0.327
64710	1	6	0.083143	0.065519	0.021
8934	1	3	0.015664	0.0028527	0.013
254428	1	6	0.065729	0.0095753	0.021
101059976	1	4	0.10698	0.2028	0.086
148811	1	6	0.16158	0.41969	0.295
115019	1	9	0.13305	0.064165	0.011
23380	1	13	0.40591	0.77386	0.54
9641	1	2	0.28307	0.34421	0.231
83593	1	17	0.6863	0.24833	0.434
1939	1	2	0.32564	0.39411	0.273
8444	1	3	0.222	0.2271	0.145
9261	1	7	0.59676	0.77841	0.487
3586	1	3	0.080401	0.091347	0.041
29949	1	18	0.054656	0.57687	0.678
50604	1	3	0.21721	0.32169	0.205
11009	1	2	0.088353	0.093971	0.084
9214	1	2	0.081727	0.10987	0.077
5284	1	4	0.24735	0.19583	0.259
83953	1	4	0.29332	0.21946	0.281
79098	1	6	0.017552	0.1755	0.192
55432	1	1	0.77746	0.77746	0.769
5208	1	7	0.4077	0.11267	0.292
725	1	10	0.33643	0.081368	0.114
722	1	8	0.48553	0.33182	0.105
1604	1	9	0.63884	0.54206	0.644
1380	1	15	0.8315	0.4152	0.59
1378	1	20	0.80787	0.75677	0.901
1379	1	12	0.67548	0.67876	0.56
4179	1	4	0.71046	0.66747	0.773
947	1	15	0.02018	0.013977	0.033
5362	1	60	0.39442	0.6256	0.523
642587	1	3	0.061345	0.36091	0.333
57172	1	14	0.36649	0.56159	0.177
3914	1	26	0.24161	0.019623	0.045
50486	1	4	0.37662	0.22947	0.253
3290	1	12	0.59866	0.65327	0.847
80342	1	11	0.58785	0.57354	0.481
148304	1	4	0.31452	0.17235	0.268
3664	1	11	0.17441	0.14266	0.326
27042	1	9	0.58277	0.54335	0.62
255928	1	31	0.22571	0.76456	0.949
56256	1	1	0.33358	0.33358	0.307
55733	1	79	0.85049	0.62893	0.755
3756	1	79	0.1512	0.48372	0.549
55758	1	3	0.4099	0.94695	0.963
7188	1	12	0.50529	0.57032	0.632
343035	1	11	0.5687	0.79369	0.627
7779	1	2	0.054327	0.51805	0.4
4751	1	6	0.11938	0.18574	0.18
9926	1	6	0.72215	0.63817	0.613
25896	1	17	0.67946	0.65694	0.269
51514	1	6	0.46441	0.80027	0.739
5525	1	6	0.70692	0.56889	0.767
55248	1	9	0.94347	0.60161	0.794
29937	1	4	0.8336	0.56857	0.679
467	1	16	0.27941	0.48657	0.216
149647	1	4	0.11207	0.20135	0.295
55509	1	7	0.95255	0.63029	0.709
25936	1	14	0.029863	0.24207	0.467
128387	1	7	0.11914	0.28395	0.439
149643	1	6	0.6541	0.71921	0.541
28982	1	6	0.8245	0.72796	0.725
79805	1	10	0.58687	0.37216	0.58
90806	1	6	0.27356	0.17073	0.384
26750	1	10	0.32566	0.22982	0.274
5629	1	5	0.44885	0.43266	0.461
56950	1	20	0.14696	0.47344	0.524
5784	1	63	0.14065	0.69655	0.863
1063	1	10	0.37065	0.54277	0.426
3776	1	59	0.077654	0.72365	0.596
51133	1	1	0.80372	0.80372	0.788
7399	1	140	0.61045	0.80363	0.871
2104	1	152	0.030295	0.33474	0.129
55105	1	21	0.31694	0.78229	0.817
128153	1	25	0.22598	0.17727	0.257
51018	1	2	0.64487	0.89798	0.872
7042	1	16	0.14932	0.11148	0.207
127018	1	9	0.75138	0.46553	0.312
55532	1	5	0.65454	0.54364	0.312
2058	1	26	0.73721	0.97753	0.999
10380	1	3	0.10038	0.041243	0.096
55699	1	2	0.079699	0.073604	0.049
25782	1	12	0.17622	0.022351	0.096
4139	1	6	0.21935	0.2063	0.151
79762	1	6	0.50331	0.36428	0.276
54996	1	7	0.23891	0.32197	0.501
64757	1	11	0.5711	0.67525	0.823
3142	1	2	0.94365	0.94555	0.954
11221	1	12	0.030346	0.64423	0.122
79802	1	3	0.72929	0.78215	0.792
9015	1	5	0.17991	0.63372	0.773
375056	1	6	0.83101	0.9755	0.992
64853	1	2	0.73733	0.79288	0.677
148362	1	2	0.89046	0.89725	0.858
400823	1	3	0.85665	0.89569	0.895
84976	1	18	0.90023	0.93925	0.988
7100	1	9	0.24884	0.060353	0.077
55061	1	22	0.99655	0.96292	0.845
164127	1	1	0.63647	0.63647	0.653
388743	1	9	0.35857	0.88569	0.838
824	1	14	0.64674	0.59986	0.597
7159	1	15	0.97131	0.4419	0.623
23219	1	5	0.85457	0.30112	0.343
8560	1	1	0.59081	0.59081	0.616
4931	1	11	0.14395	0.26474	0.177
29097	1	8	0.4111	0.24227	0.167
80232	1	11	0.51272	0.25506	0.166
149111	1	41	0.053357	0.4533	0.312
127602	1	47	0.013842	0.28839	0.0046
3930	1	6	0.19354	0.42597	0.405
55740	1	29	0.2222	0.043966	0.223
6726	1	1	0.70663	0.70663	0.714
2052	1	11	0.17624	0.74063	0.459
9725	1	11	0.66032	0.61984	0.614
10637	1	5	0.85704	0.38576	0.441
7044	1	2	0.39688	0.61995	0.591
163859	1	1	0.10542	0.10542	0.105
3020	1	1	0.31214	0.31214	0.31
64746	1	5	0.0098902	0.046354	0.039
83881	1	1	0.9122	0.9122	0.907
286826	1	4	0.53028	0.56462	0.443
142	1	20	0.63428	0.51217	0.622
375057	1	26	0.34702	0.13397	0.081
3707	1	18	0.52097	0.26751	0.584
5664	1	11	0.18733	0.88383	0.945
56997	1	8	0.58214	0.40606	0.485
8476	1	67	0.43255	0.62417	0.684
339500	1	15	0.90379	0.36296	0.678
116841	1	8	0.55449	0.95948	0.966
339501	1	8	0.43037	0.50492	0.424
7483	1	6	0.22399	0.32765	0.521
89780	1	3	0.0010916	0.28936	0.203
375	1	2	0.36208	0.1719	0.195
200205	1	3	0.36274	0.46846	0.43
84033	1	19	0.25782	0.48808	0.528
81559	1	1	0.70663	0.70663	0.698
51127	1	1	0.70663	0.70663	0.698
8290	1	2	0.9165	0.83324	0.88
92815	1	2	0.14448	0.15774	0.145
128312	1	2	0.14448	0.15774	0.145
337872	1	3	0.12728	0.04523	0.086
58480	1	9	0.98581	0.95305	0.916
5867	1	8	0.5603	0.68947	0.684
10638	1	6	0.84738	0.56759	0.618
126731	1	11	0.12327	0.765	0.637
58	1	3	0.63445	0.55059	0.531
55746	1	12	0.27001	0.43788	0.184
23456	1	1	0.29652	0.29653	0.298
27097	1	5	0.60558	0.90274	0.884
9816	1	9	0.019069	0.19785	0.081
2590	1	60	0.023562	0.0084219	0.06
79605	1	20	0.32959	0.22278	0.423
22796	1	13	0.74985	0.42863	0.563
183	1	9	0.49984	0.26293	0.345
10753	1	16	0.0069891	0.055952	0.0116
84886	1	9	0.12045	0.27711	0.517
79573	1	27	0.47851	0.13266	0.458
64801	1	4	0.35838	0.482	0.5
375061	1	2	0.016427	0.10394	0.106
440730	1	14	0.20016	0.3701	0.863
149373	1	4	0.58251	0.37494	0.538
128061	1	9	0.18683	0.37945	0.681
8443	1	6	0.020094	0.22674	0.476
83932	1	1	0.9385	0.9385	0.942
54583	1	10	0.93423	0.95112	0.928
7257	1	3	0.14169	0.30556	0.121
27185	1	86	0.0033211	0.89223	0.577
57568	1	50	0.030369	0.16145	0.225
54627	1	5	0.62874	0.59918	0.664
84284	1	8	0.78915	0.55252	0.666
80003	1	61	0.085423	0.44167	0.095
84451	1	24	0.10127	0.33482	0.052
3775	1	27	0.053051	0.00072884	0.0024
148641	1	81	0.32169	0.40184	0.742
388753	1	8	0.19636	0.17907	0.09
6894	1	25	0.15432	0.40091	0.423
359948	1	2	0.078487	0.27143	0.285
9804	1	1	0.84466	0.84466	0.844
51742	1	17	0.16997	0.85843	0.844
9453	1	2	0.87549	0.70925	0.785
6905	1	9	0.47747	0.77386	0.538
148789	1	7	0.99746	0.97003	0.982
2786	1	27	0.59076	0.8898	0.486
1130	1	13	0.66116	0.4256	0.421
4811	1	16	0.3454	0.36091	0.41
7107	1	7	0.90058	0.94742	0.986
56605	1	21	0.54341	0.14997	0.248
128178	1	22	0.011625	0.18004	0.184
3964	1	16	0.24185	0.028611	0.078
55127	1	22	0.16711	0.036312	0.103
88	1	18	0.052009	0.0043893	0.092
4548	1	26	0.41332	0.79046	0.619
645745	1	7	0.043746	0.66699	0.776
6262	1	154	0.067093	0.2256	0.19
57829	1	15	0.28571	0.71396	0.8
1131	1	52	0.74196	0.77738	0.544
56776	1	76	0.037096	0.23935	0.614
64388	1	20	0.44502	0.49466	0.392
6000	1	109	0.96841	0.96625	0.718
2271	1	7	0.064358	0.47736	0.183
8564	1	20	0.41641	0.41337	0.254
23596	1	15	0.39382	0.12658	0.088
1122	1	2	0.72035	0.60149	0.656
128025	1	25	0.52838	0.19573	0.47
9156	1	15	0.39635	0.72791	0.733
200150	1	97	0.19892	0.0091257	0.0064
9859	1	4	0.61445	0.39348	0.54
10806	1	23	0.84676	0.51493	0.687
10000	1	22	0.94478	0.92776	0.938
10472	1	1	0.36542	0.36542	0.378
200159	1	15	0.18936	0.44202	0.185
159	1	6	0.95676	0.92595	0.902
257044	1	29	0.17932	0.60898	0.576
51029	1	10	0.36264	0.24683	0.352
116228	1	2	0.63666	0.59231	0.569
84288	1	25	0.24227	0.17598	0.34
55083	1	101	0.044909	0.63783	0.575
64754	1	120	0.057173	0.73186	0.347
64216	1	7	0.47315	0.34291	0.359
163882	1	8	0.003894	0.02473	0.026
51097	1	9	0.35418	0.67809	0.71
100130097	1	12	0.20246	0.63486	0.695
25909	1	10	0.5786	0.81771	0.169
57116	1	4	0.64464	0.46715	0.682
93474	1	9	0.64436	0.82793	0.779
79862	1	1	0.39638	0.39638	0.39
388759	1	1	0.39638	0.39638	0.39
7678	1	8	0.31138	0.33799	0.292
84838	1	9	0.665	0.90158	0.839
114548	1	6	0.72165	0.62197	0.472
127623	1	3	0.62648	0.65979	0.494
441932	1	1	0.47987	0.47987	0.478
81472	1	5	0.28152	0.53932	0.423
148823	1	4	0.17298	0.20988	0.11
81470	1	2	0.62887	0.63035	0.634
81469	1	1	0.44285	0.44285	0.445
343169	1	4	0.80731	0.6751	0.675
26188	1	1	0.24984	0.24984	0.287
284532	1	5	0.3961	0.2829	0.338
391189	1	5	0.28339	0.35106	0.425
25893	1	8	0.62572	0.46387	0.246
343171	1	1	0.20435	0.20435	0.21
343172	1	2	0.60941	0.50924	0.507
284521	1	14	0.55237	0.91757	0.927
391190	1	2	0.8152	0.65725	0.761
391191	1	3	0.34597	0.73185	0.58
81466	1	3	0.89713	0.79935	0.813
26246	1	2	0.94056	0.78745	0.816
391194	1	3	0.74728	0.85726	0.891
127062	1	1	0.81581	0.81581	0.81
26245	1	2	0.26007	0.25194	0.198
391195	1	5	0.8695	0.83874	0.709
127064	1	4	0.7038	0.77677	0.593
391196	1	3	0.50832	0.92899	0.93
127066	1	2	0.28051	0.18346	0.211
127074	1	4	0.45135	0.23841	0.276
254879	1	3	0.32991	0.21243	0.285
26696	1	4	0.35138	0.15072	0.188
401994	1	3	0.72419	0.93953	0.968
80851	1	3	0.42862	0.18499	0.347
79894	1	1	0.75311	0.75311	0.751
55657	1	2	0.4989	0.49976	0.406
642273	2	2	0.62906	0.61358	0.553
26751	2	18	0.45201	0.88737	0.893
52	2	10	0.28393	0.92475	0.846
285016	2	7	0.97579	0.8582	0.863
129787	2	4	0.34992	0.63138	0.639
54221	2	59	0.50179	0.50776	0.203
7173	2	18	0.13828	0.11454	0.083
7837	2	15	0.53449	0.49746	0.595
23040	2	71	0.11844	0.45853	0.116
7260	2	36	0.72386	0.63495	0.15
51112	2	14	0.69309	0.80601	0.871
55256	2	7	0.30735	0.22872	0.068
246243	2	1	0.81603	0.81603	0.815
6201	2	1	0.0065277	0.0065277	0.0052
78989	2	15	0.76542	0.81723	0.89
55821	2	9	0.67902	0.81271	0.816
728597	2	45	0.91879	0.81625	0.54
6664	2	4	0.34952	0.58965	0.437
129607	2	4	0.11498	0.04966	0.122
91543	2	3	0.11466	0.07558	0.074
9781	2	53	0.59604	0.41815	0.227
3398	2	2	0.13964	0.25618	0.173
57498	2	11	0.73329	0.49673	0.382
129642	2	8	0.03478	0.01138	0.0134
8853	2	30	0.052919	0.45788	0.373
9270	2	4	0.87146	0.82873	0.542
51692	2	5	0.48363	0.87638	0.743
285148	2	7	0.055401	0.9449	0.96
6868	2	14	0.55865	0.92097	0.958
10971	2	12	0.29152	0.11966	0.408
9014	2	19	0.20886	0.71677	0.72
29841	2	16	0.26742	0.20428	0.345
8462	2	6	0.57738	0.48752	0.632
192668	2	7	0.1164	0.1862	0.077
6241	2	3	0.49266	0.61005	0.732
348738	2	17	0.70351	0.73574	0.917
3241	2	24	0.8904	0.55649	0.667
4953	2	4	0.16818	0.059071	0.173
79954	2	22	0.12204	0.62434	0.182
245973	2	15	0.86793	0.5959	0.556
10130	2	27	0.20111	0.39953	0.664
3754	2	3	0.84441	0.75314	0.901
130813	2	7	0.97245	0.69194	0.821
130814	2	7	0.85704	0.63787	0.756
9475	2	17	0.083721	0.55962	0.584
650157	2	8	0.92558	0.67133	0.723
1876	2	4	0.23743	0.67164	0.447
9687	2	26	0.53562	0.77273	0.918
23620	2	5	0.47574	0.65841	0.727
23175	2	26	0.096381	0.30899	0.523
28951	2	10	0.67326	0.85701	0.966
151354	2	1	0.88987	0.88987	0.904
51594	2	62	0.27819	0.73599	0.874
1653	2	6	0.30822	0.27001	0.227
4613	2	2	0.33634	0.23366	0.23
81553	2	32	0.16574	0.22914	0.472
729475	2	1	0.94213	0.94213	0.943
7447	2	25	0.39842	0.041765	0.157
79677	2	7	0.68865	0.12015	0.231
348654	2	6	0.25919	0.30564	0.222
343930	2	6	0.51941	0.24242	0.33
3790	2	16	0.63557	0.32969	0.358
57665	2	1	0.8343	0.8343	0.827
100526794	2	3	0.30944	0.34693	0.304
93034	2	2	0.16926	0.20758	0.186
130497	2	2	0.55557	0.40774	0.527
130502	2	3	0.94443	0.95885	0.933
57539	2	4	0.993	0.95757	0.985
4148	2	6	0.5467	0.39599	0.542
9741	2	6	0.91112	0.59921	0.653
6382	2	2	0.10228	0.16127	0.121
23369	2	4	0.36744	0.22497	0.229
64342	2	7	0.93487	0.69847	0.666
151449	2	1	0.89777	0.89777	0.891
60526	2	11	0.65372	0.50904	0.6
338	2	9	0.77121	0.23488	0.218
114818	2	78	0.38898	0.32171	0.431
54454	2	16	0.0031547	0.23914	0.099
165324	2	4	0.25207	0.26725	0.207
388931	2	1	0.86465	0.86465	0.864
80304	2	2	0.38589	0.45132	0.342
2281	2	3	0.38476	0.20754	0.209
51639	2	3	0.20547	0.10094	0.112
9540	2	3	0.19421	0.14533	0.132
375189	2	3	0.14156	0.16566	0.141
375190	2	7	0.19979	0.31244	0.232
653140	2	5	0.31184	0.13796	0.134
50618	2	26	0.078329	0.06091	0.173
8648	2	18	0.010472	0.019054	0.0058
391356	2	4	0.7107	0.80983	0.537
79172	2	8	0.019785	0.078335	0.0024
109	2	13	0.048359	0.0083009	0.0036
51277	2	4	0.039864	0.020097	0.049
22979	2	16	0.010412	0.0034614	0.046
5443	2	7	0.076273	0.046032	0.028
1788	2	8	0.265	0.11333	0.059
1838	2	24	0.053822	0.25897	0.274
55252	2	16	0.33608	0.41532	0.222
3797	2	7	0.10759	0.039638	0.05
10890	2	9	0.85217	0.47128	0.494
150946	2	1	0.62114	0.62114	0.592
3030	2	5	0.3505	0.6005	0.658
165082	2	12	0.62278	0.54671	0.491
85465	2	8	0.09416	0.24208	0.126
92749	2	9	0.20297	0.59313	0.874
9381	2	21	0.72411	0.7683	0.533
339778	2	8	0.48375	0.42004	0.324
130106	2	16	0.3811	0.67138	0.616
3777	2	11	0.45905	0.66997	0.541
1058	2	2	0.029095	0.03319	0.025
56896	2	12	0.45871	0.27354	0.315
22924	2	7	0.30357	0.66271	0.637
60509	2	2	0.44036	0.55356	0.491
100128731	2	1	0.7745	0.7745	0.782
11117	2	2	0.95263	0.77343	0.846
3795	2	1	0.75974	0.75974	0.787
10669	2	1	0.75213	0.75213	0.745
84696	2	4	0.86397	0.92741	0.96
10113	2	4	0.86397	0.92741	0.96
339779	2	3	0.77348	0.90226	0.887
150921	2	1	0.94686	0.94686	0.946
8884	2	8	0.61151	0.50551	0.602
51374	2	7	0.74858	0.48729	0.588
790	2	8	0.52605	0.41775	0.573
7781	2	3	0.68954	0.67325	0.712
57159	2	3	0.47572	0.70375	0.685
7349	2	1	0.7486	0.7486	0.733
4358	2	1	0.7486	0.7486	0.733
2976	2	1	0.011584	0.011584	0.0112
26160	2	1	0.49526	0.49526	0.503
64838	2	1	0.49526	0.49526	0.503
2646	2	6	0.00038283	0.00033656	0.00021
84226	2	2	0.034468	0.20111	0.192
84450	2	7	0.16328	0.12494	0.028
79635	2	6	0.21365	0.16455	0.033
11321	2	6	0.23349	0.40521	0.382
9913	2	1	0.52749	0.52749	0.518
22950	2	1	0.52749	0.52749	0.518
9553	2	3	0.09357	0.026041	0.025
64080	2	8	0.16873	0.020192	0.031
9577	2	41	0.20842	0.0088936	0.036
2355	2	7	0.0017588	0.00056292	0.00082
151056	2	38	0.2711	0.28256	0.246
5500	2	7	0.2492	0.47927	0.238
245711	2	8	0.62732	0.61915	0.435
55006	2	5	0.25774	0.65093	0.704
23160	2	14	0.40246	0.76681	0.861
165186	2	17	0.88798	0.7576	0.803
388939	2	5	0.90195	0.79025	0.776
79745	2	14	0.99521	0.75752	0.874
238	2	154	0.12418	0.14034	0.182
51646	2	3	0.51702	0.70934	0.771
81606	2	5	0.60727	0.38653	0.418
253558	2	57	0.54029	0.24965	0.122
92291	2	44	0.44947	0.01603	0.131
79623	2	53	0.15746	0.21494	0.406
440854	2	24	0.47215	0.83805	0.488
30845	2	12	0.16828	0.64996	0.389
7498	2	19	0.25886	0.63131	0.786
6716	2	7	0.93406	0.71914	0.72
51072	2	5	0.94447	0.7847	0.906
100652775	2	2	0.45422	0.2224	0.252
6683	2	7	0.17366	0.47257	0.431
55676	2	8	0.62753	0.39703	0.47
58484	2	8	0.5217	0.4544	0.483
84272	2	5	0.40462	0.32848	0.238
57448	2	10	0.22835	0.64551	0.193
55622	2	26	0.12278	0.0027043	0.016
4052	2	86	0.16914	0.49915	0.737
25780	2	33	0.20875	0.042781	0.067
25940	2	5	0.33779	0.44649	0.109
51232	2	67	0.42119	0.31739	0.473
9637	2	17	0.27911	0.47474	0.578
5212	2	44	0.40769	0.56004	0.719
6801	2	10	0.48464	0.5179	0.712
54497	2	10	0.34287	0.51922	0.256
253635	2	2	0.94774	0.86707	0.938
5610	2	5	0.70523	0.20396	0.281
391365	2	6	0.6872	0.28956	0.33
10153	2	2	0.75791	0.82528	0.786
55471	2	5	0.77855	0.74895	0.832
23683	2	20	0.26989	0.30212	0.364
25797	2	2	0.80822	0.81167	0.844
10602	2	15	0.48322	0.32079	0.452
151393	2	20	0.34808	0.41379	0.227
1545	2	5	0.80205	0.70342	0.668
64225	2	8	0.48185	0.80002	0.811
92906	2	8	0.56556	0.17143	0.309
130589	2	11	0.51645	0.47581	0.509
79833	2	3	0.30443	0.11733	0.14
90957	2	6	0.84248	0.34103	0.436
729967	2	2	0.69773	0.45976	0.515
100271715	2	10	0.26062	0.61651	0.394
6654	2	13	0.64274	0.51345	0.533
344387	2	9	0.83923	0.29044	0.461
8491	2	26	0.67815	0.49344	0.824
130733	2	9	0.30237	0.082357	0.169
80745	2	7	0.11657	0.15659	0.161
6546	2	114	0.62333	0.043023	0.209
400950	2	4	0.33859	0.16294	0.219
91461	2	8	0.29931	0.23213	0.245
27436	2	20	0.55524	0.36232	0.335
9167	2	5	0.084686	0.023473	0.05
170850	2	5	0.23024	0.084186	0.073
57504	2	8	0.33879	0.77624	0.632
165140	2	5	0.0056506	0.67757	0.558
23498	2	12	0.014669	0.7069	0.666
678	2	1	0.2307	0.2307	0.219
63892	2	60	0.016078	0.054923	0.09
130271	2	33	0.074586	0.0067612	0.08
728819	2	1	0.5888	0.5888	0.586
51626	2	10	0.029919	0.0085622	0.004
64240	2	14	0.053199	0.13688	0.0076
64241	2	7	0.87485	0.62171	0.879
10128	2	24	0.75326	0.40373	0.668
5495	2	8	0.44367	0.63047	0.498
6519	2	10	0.0033676	0.32956	0.398
9581	2	15	0.00078254	0.26245	0.352
79823	2	67	0.18795	0.37256	0.425
6496	2	2	0.86725	0.88527	0.921
10736	2	5	0.058983	0.019238	0.092
55133	2	39	0.30982	0.16858	0.242
5581	2	147	0.57211	0.23663	0.632
2034	2	21	0.64816	0.67219	0.759
388946	2	8	0.95505	0.81767	0.905
90423	2	8	0.79254	0.72016	0.855
23433	2	5	0.21287	0.24998	0.287
5281	2	6	0.34082	0.10707	0.18
9419	2	5	0.18619	0.13529	0.107
9655	2	15	0.63215	0.85871	0.137
90411	2	6	0.97175	0.8424	0.895
57217	2	27	0.73721	0.67198	0.898
285051	2	20	0.083856	0.30442	0.336
805	2	6	0.061409	0.59353	0.68
4436	2	5	0.37306	0.51066	0.429
56660	2	8	0.20797	0.29467	0.4
2956	2	4	0.96924	0.89166	0.952
80204	2	8	0.70862	0.48337	0.464
3344	2	10	0.89909	0.87849	0.899
129285	2	5	0.41355	0.30645	0.236
286749	2	46	0.62149	0.84073	0.672
11037	2	14	0.14965	0.89248	0.912
11036	2	14	0.88386	0.37106	0.288
3973	2	18	0.77826	0.61949	0.421
2492	2	63	0.6336	0.17852	0.385
9378	2	230	0.24462	0.44693	0.508
51130	2	18	0.63299	0.33331	0.369
100302652	2	25	0.60347	0.30732	0.212
494143	2	3	0.17747	0.16487	0.221
27248	2	6	0.22428	0.2879	0.497
23198	2	16	0.50902	0.37268	0.321
98	2	32	0.7756	0.61988	0.898
388951	2	9	0.81852	0.34876	0.544
129852	2	9	0.87995	0.53332	0.57
6711	2	55	0.16867	0.69053	0.358
400954	2	66	0.79837	0.95946	0.364
57142	2	19	0.20183	0.15287	0.123
130162	2	5	0.50187	0.78159	0.666
6233	2	1	0.29623	0.29623	0.276
4528	2	4	0.52118	0.57084	0.704
55704	2	26	0.67124	0.65556	0.787
112942	2	4	0.69553	0.77686	0.839
57223	2	16	0.66429	0.66145	0.91
87178	2	16	0.55831	0.77377	0.894
2202	2	17	0.047995	0.58847	0.778
114800	2	37	0.1784	0.49648	0.38
7444	2	8	0.024501	0.0029488	0.0046
55120	2	14	0.12137	0.017153	0.008
53335	2	26	0.081944	0.621	0.898
64895	2	7	0.49291	0.14742	0.213
5966	2	1	0.38993	0.38993	0.387
150962	2	7	0.034244	0.029425	0.0074
5194	2	3	0.25956	0.19117	0.193
84542	2	4	0.19678	0.61	0.364
339804	2	4	0.064505	0.0076512	0.011
130872	2	3	0.032988	0.047858	0.052
[truncated: 14,972 more rows]

## Sheet: Gene-set analysis
Results from gene-set analysis of CD data		Results are sorted by MAGMA-main competitive p-value
		'Genes in data' reflects the number of genes annotated in the CD data (ie. containing at least one SNP)
			Self-contained gene-set analysis				Competitive gene-set analysis
Gene-set	Total genes	Genes in data	MAGMA-main	MAGMA-pval-1K	PLINK-avg	PLINK-prune	MAGMA-main	MAGMA-main (no correction)	MAGMA-pval-1K	ALIGATOR (0.01)	ALIGATOR (0.01), FWER	ALIGATOR (0.005)	ALIGATOR (0.005), FWER	ALIGATOR (0.001)	ALIGATOR (0.001), FWER	ALIGATOR (0.0001)	ALIGATOR (0.0001), FWER	INRICH (0.01)	INRICH (0.01), FWER	INRICH (0.005)	INRICH (0.005), FWER	INRICH (0.001)	INRICH (0.001), FWER	INRICH (0.0001)	INRICH (0.0001), FWER	MAGENTA (5%)	MAGENTA (1%)
REACTOME_REGULATION_OF_AMPK_ACTIVITY_VIA_LKB1	15	11	2.67e-10	0.0363	0.288	0.108	2.64e-05	2.26e-05	0.0585	0.331	1							0.373	1							0.093	0.104
REACTOME_HYALURONAN_UPTAKE_AND_DEGRADATION	10	6	2.22e-06	0.117	0.165	0.0967	7.02e-05	5.8e-05	0.0535
KEGG_ECM_RECEPTOR_INTERACTION	84	74	9.94e-11	1.6e-06	0.00126	3e-05	9.35e-05	1.15e-05	0.000521	0.103	1	0.135	1	0.507	1			0.0842	1	0.0186	0.996	0.567	1			0.00098	0.171
KEGG_CELL_ADHESION_MOLECULES_CAMS	134	99	7.89e-10	0.00058	7e-05	1e-05	0.000101	1.06e-05	0.0112	0.0286	0.999	0.194	1	0.765	1			0.106	1	0.252	1	0.294	1			0.009	0.609
PID_IL5_PATHWAY	14	12	2.24e-05	0.000329	0.00044	0.00036	0.000304	0.000409	0.0177	0.148	1	0.0572	1					0.0581	1	0.1	1					0.115
REACTOME_ENERGY_DEPENDENT_REGULATION_OF_MTOR_BY_LKB1_AMPK	18	14	3.04e-08	0.0739	0.276	0.11	0.000382	0.000411	0.143	0.365	1							0.404	1							0.174	0.128
REACTOME_PKB_MEDIATED_EVENTS	29	22	9.74e-08	0.177	0.359	0.103	0.000651	0.000715	0.512	0.206	1	0.254	1					0.267	1	0.294	1					0.082	0.19
KEGG_ALPHA_LINOLENIC_ACID_METABOLISM	19	17	0.00278	0.0887	0.553	0.366	0.000665	0.000955	0.0755
REACTOME_METABOLISM_OF_POLYAMINES	15	11	1.87e-05	0.0556	0.207	0.0708	0.000788	0.00114	0.0368	0.094	1							0.212	1							0.083
KEGG_CYSTEINE_AND_METHIONINE_METABOLISM	34	30	2.23e-06	0.0157	0.323	0.0217	0.00129	0.00246	0.11	0.0434	1	0.186	1					0.138	1	0.355	1					0.069	0.254
KEGG_LINOLEIC_ACID_METABOLISM	29	24	0.018	0.317	0.713	0.562	0.00213	0.00369	0.436
REACTOME_GABA_SYNTHESIS_RELEASE_REUPTAKE_AND_DEGRADATION	17	13	5.4e-05	0.0625	0.627	0.255	0.00246	0.00169	0.126																	0.477
REACTOME_HYALURONAN_METABOLISM	14	9	9.06e-05	0.128	0.129	0.106	0.00333	0.00284	0.118
KEGG_CYTOKINE_CYTOKINE_RECEPTOR_INTERACTION	267	153	1.79e-08	1.05e-07	1e-05	1e-05	0.00395	0.0102	2.83e-05	0.0168	0.997	0.0078	0.92	0.0018	0.455	0.0406	0.92	0.0912	1	0.0536	1	0.0024	0.537	0.0007	0.185	0.041	0.005
REACTOME_TRANSCRIPTIONAL_ACTIVITY_OF_SMAD2_SMAD3_SMAD4_HETEROTRIMER	38	28	1.95e-05	0.102	0.195	0.053	0.00427	0.00489	0.371	0.443	1	0.207	1					0.594	1	0.308	1					0.408
KEGG_SYSTEMIC_LUPUS_ERYTHEMATOSUS	140	44	9.98e-06	0.0353	0.00684	0.00135	0.00482	0.00744	0.149	0.0042	0.813	0.0942	1	0.0118	0.944			0.0787	1	0.313	1	0.0938	1			0.061	0.075
REACTOME_DOWNREGULATION_OF_SMAD2_3_SMAD4_TRANSCRIPTIONAL_ACTIVITY	20	16	0.00012	0.321	0.463	0.101	0.00596	0.0051	0.373																	0.571
REACTOME_PI3K_CASCADE	71	54	1.51e-06	0.0333	0.147	0.0271	0.00626	0.00715	0.324	0.206	1	0.116	1					0.434	1	0.248	1					0.043	0.421
PID_IL3_PATHWAY	27	15	0.0006	0.00344	0.00495	0.00026	0.00703	0.00716	0.0486	0.0508	1	0.0128	0.98					0.0374	1	0.006	0.884					0.035
KEGG_GLUTATHIONE_METABOLISM	50	35	0.00157	0.491	0.42	0.239	0.00721	0.0224	0.486																	0.815
BIOCARTA_IL17_PATHWAY	17	13	0.000222	0.00382	0.133	0.0586	0.00863	0.00515	0.0101	0.0038	0.795	0.34	1					0.006	0.91	0.121	1					0.122
REACTOME_INTERFERON_GAMMA_SIGNALING	63	42	6.91e-06	0.00256	0.00086	1e-05	0.00863	0.00992	0.0701	0.0026	0.683	0.004	0.75	0.0014	0.376	0.0046	0.517	0.0023	0.65	0.0007	0.279	0.0001	0.069	0.0318	0.966	0.00101	0.00837
REACTOME_ENDOSOMAL_VACUOLAR_PATHWAY	9	5	0.000401	0.0119	0.00104	0.00138	0.00868	0.00991	0.463	0.0002	0.195	0.002	0.538					0.0012	0.443	0.0038	0.76	0.0047	0.745			0.00128
BIOCARTA_CTLA4_PATHWAY	21	17	0.00019	0.178	0.0442	0.0169	0.00971	0.00622	0.178	0	0.137	0.014	0.986					0.0031	0.737	0.0411	1					0.007
KEGG_GLYCOSAMINOGLYCAN_DEGRADATION	21	15	0.000688	0.0241	0.0252	0.192	0.00995	0.00924	0.0644
PID_WNT_NONCANONICAL_PATHWAY	32	24	0.000541	0.00279	0.0841	0.0132	0.0102	0.00776	0.0653	0.414	1	0.411	1					0.119	1	0.073	1					0.116	0.208
REACTOME_PHOSPHOLIPID_METABOLISM	198	162	1.22e-07	0.000645	0.0228	0.00011	0.0114	0.00736	0.0979	0.155	1	0.526	1					0.115	1	0.196	1	0.797	1			0.109
REACTOME_PHOSPHORYLATION_OF_CD3_AND_TCR_ZETA_CHAINS	16	12	8.93e-06	0.00247	0.00017	0.00016	0.0116	0.0138	0.00573	0.0156	0.995							0.0111	0.984	0.12	1	0.0118	0.954			0.114	0.134
BIOCARTA_TCAPOPTOSIS_PATHWAY	11	9	0.000155	0.00985	0.126	0.05	0.0118	0.00514	0.0222	0.001	0.431	0.291	1					0.0132	0.992	0.339	1					0.088
REACTOME_CELL_CELL_COMMUNICATION	120	95	8.9e-08	0.00999	0.0744	0.00468	0.0126	0.000851	0.0593	0.3	1	0.347	1	0.654	1			0.488	1	0.481	1	0.639	1			0.202
KEGG_JAK_STAT_SIGNALING_PATHWAY	155	101	4.18e-06	3.11e-05	1e-05	1e-05	0.014	0.0211	0.00672	0.0008	0.381	0.001	0.35	0.0004	0.172	0.001	0.235	0.0066	0.927	0.0054	0.862	0.0022	0.51	0.0002	0.0756	0.007	0.002
PID_IL23PATHWAY	37	27	4.58e-06	0.000242	1e-05	1e-05	0.0143	0.0206	0.036	0.0454	1	0.0088	0.937	0.0012	0.335	0.0008	0.212	0.178	1	0.0383	1	0.0062	0.824	0.0002	0.0756	0.041	0.001
PID_ERBB_NETWORK_PATHWAY	15	14	6.68e-05	0.00471	0.0952	0.151	0.0143	0.00298	0.0392	0.439	1	0.45	1					0.458	1	0.417	1					0.491
KEGG_GALACTOSE_METABOLISM	26	21	0.000515	0.0478	0.0296	0.0586	0.0151	0.0132	0.118	0.411	1							0.6	1							0.283	0.187
REACTOME_INTEGRIN_CELL_SURFACE_INTERACTIONS	79	70	5.2e-05	0.0284	0.00918	0.00015	0.0152	0.00691	0.215	0.251	1	0.184	1	0.365	1			0.171	1	0.0929	1	0.467	1			0.019	0.18
REACTOME_INSULIN_RECEPTOR_SIGNALLING_CASCADE	87	66	2.99e-06	0.0395	0.136	0.0291	0.0159	0.0155	0.348	0.431	1	0.244	1					0.692	1	0.439	1					0.109	0.493
PID_A6B1_A6B4_INTEGRIN_PATHWAY	46	39	1.68e-05	8.64e-05	0.0101	0.00059	0.0161	0.0101	0.0307	0.09	1	0.023	0.999					0.0567	1	0.0102	0.97	0.216	1			0.01	0.323
PID_SMAD2_3NUCLEARPATHWAY	82	59	0.000536	0.0161	0.0898	0.00583	0.0184	0.0191	0.105	0.307	1	0.162	1					0.352	1	0.163	1					0.162	0.442
REACTOME_ENDOGENOUS_STEROLS	15	12	0.00614	0.0534	0.0816	0.045	0.019	0.0343	0.256																	0.481
REACTOME_CASPASE_MEDIATED_CLEAVAGE_OF_CYTOSKELETAL_PROTEINS	13	11	0.00224	0.252	0.00056	0.0333	0.0192	0.0191	0.253	0.04	1	0.008	0.923					0.0835	1	0.0254	0.999					0.021	0.099
REACTOME_CELL_CELL_JUNCTION_ORGANIZATION	56	42	6.58e-05	0.159	0.503	0.215	0.0196	0.00365	0.164	0.636	1	0.553	1					0.866	1	0.832	1					0.369
REACTOME_SPHINGOLIPID_METABOLISM	69	54	0.000206	0.00805	0.0773	0.0247	0.0203	0.0154	0.0617	0.0806	1	0.141	1					0.225	1	0.3	1					0.059
BIOCARTA_THELPER_PATHWAY	14	10	0.000825	0.0534	0.131	0.0588	0.0207	0.00983	0.0907	0.0024	0.657	0.312	1					0.0124	0.99	0.339	1					0.082
REACTOME_SYNTHESIS_OF_PE	11	7	0.0128	0.105	0.31	0.111	0.0216	0.0213	0.0219
PID_RB_1PATHWAY	65	47	0.00169	0.0169	0.0792	0.2	0.0217	0.0189	0.0106	0.543	1	0.481	1					0.505	1	0.18	1					0.434
PID_INTEGRIN5_PATHWAY	17	15	0.0156	0.0184	0.086	0.00682	0.0234	0.0186	0.129	0.491	1							0.259	1	0.295	1					0.555
REACTOME_RECYCLING_OF_BILE_ACIDS_AND_SALTS	11	11	0.00411	0.419	0.853	0.686	0.024	0.0232	0.506
BIOCARTA_PLATELETAPP_PATHWAY	14	12	0.000952	0.0472	0.00369	0.00066	0.0241	0.0128	0.0468	0.625	1	0.338	1					0.321	1	0.12	1	0.0587	1			0.118	0.114
REACTOME_PRE_NOTCH_EXPRESSION_AND_PROCESSING	44	36	0.000157	0.000695	0.0149	0.00783	0.026	0.022	0.00126	0.0072	0.932	0.0128	0.98					0.009	0.968	0.0088	0.955					0.002	0.306
KEGG_ETHER_LIPID_METABOLISM	33	28	0.0309	0.0776	0.14	0.513	0.0276	0.0286	0.15																	0.753
KEGG_ABC_TRANSPORTERS	44	41	1.52e-05	0.00017	0.0493	0.00043	0.0286	0.02	0.00319	0.032	0.999	0.22	1	0.139	1			0.0458	1	0.105	1	0.0074	0.865			0.142	0.058
REACTOME_INTRINSIC_PATHWAY	17	12	0.00977	0.278	0.146	0.08	0.0288	0.0243	0.281																	0.439	0.105
REACTOME_GLYCOSPHINGOLIPID_METABOLISM	38	28	0.000183	0.00742	0.0323	0.0107	0.0293	0.0337	0.0911	0.0276	0.999	0.085	1					0.1	1	0.202	1					0.046
BIOCARTA_AHSP_PATHWAY	13	6	0.00227	0.0397	0.136	0.0422	0.0296	0.0301	0.154
BIOCARTA_TCYTOTOXIC_PATHWAY	14	10	0.00148	0.0412	0.132	0.0621	0.03	0.0153	0.0756	0.0016	0.544	0.302	1					0.0122	0.989	0.34	1					0.088
REACTOME_DSCAM_INTERACTIONS	11	9	0.000563	0.115	0.286	0.063	0.0306	0.00729	0.146	0.591	1	0.664	1					0.611	1	0.639	1
KEGG_AMINO_SUGAR_AND_NUCLEOTIDE_SUGAR_METABOLISM	44	31	0.00564	0.0465	0.125	0.0605	0.0312	0.0323	0.0503									0.587	1	0.278	1	0.0965	1			0.78	0.284
KEGG_GLYCEROPHOSPHOLIPID_METABOLISM	77	58	0.00121	0.0309	0.346	0.151	0.0319	0.0273	0.266	0.571	1							0.532	1	0.736	1					0.949
KEGG_INTESTINAL_IMMUNE_NETWORK_FOR_IGA_PRODUCTION	48	32	0.00118	0.0199	4e-05	9e-05	0.0319	0.0566	0.328	0.0012	0.471	0.0142	0.988	0.0054	0.788			0.0525	1	0.0289	1	0.0646	1			0.229	0.279
REACTOME_CHROMOSOME_MAINTENANCE	122	61	0.00342	0.116	0.557	0.333	0.0323	0.0326	0.311	0.879	1	0.614	1					0.959	1	0.785	1					0.972	0.449
REACTOME_CHONDROITIN_SULFATE_DERMATAN_SULFATE_METABOLISM	49	34	0.000327	0.188	0.48	0.203	0.033	0.0151	0.281	0.634	1							0.706	1
PID_TCRCALCIUMPATHWAY	29	20	0.00843	0.0531	0.00205	0.00125	0.0339	0.0236	0.114	0.085	1	0.085	1	0.002	0.477	0.0026	0.399	0.0741	1	0.044	1	0.001	0.289	0.0001	0.0492	0.074	0.002
BIOCARTA_TH1TH2_PATHWAY	19	16	3.06e-05	0.0015	0.00027	1e-05	0.0342	0.0438	0.0395	0.0004	0.267	0	0.095	0	0.092			0.0074	0.944	0.0006	0.25	0.0001	0.069	0.0025	0.446	0.00102	0.00061
REACTOME_NEPHRIN_INTERACTIONS	20	17	0.000428	0.0428	0.0627	0.0229	0.0346	0.00859	0.15	0.436	1	0.395	1					0.488	1	0.418	1					0.581
BIOCARTA_TCRA_PATHWAY	13	11	0.000126	0.0199	0.0314	0.01	0.0349	0.0185	0.0413	0.005	0.86	0.375	1					0.0235	1	0.381	1					0.115
KEGG_AUTOIMMUNE_THYROID_DISEASE	53	27	0.00103	0.149	0.0386	0.00402	0.0351	0.0434	0.295	0	0.137	0.0044	0.778	0.0168	0.968			0.0048	0.863	0.0219	0.999	0.0015	0.399			0.008	0.241
REACTOME_SEMA3A_PAK_DEPENDENT_AXON_REPULSION	15	12	0.00172	0.0214	0.1	0.0771	0.0353	0.0246	0.0465									0.54	1
REACTOME_ABC_FAMILY_PROTEINS_MEDIATED_TRANSPORT	34	29	0.000864	0.00386	0.0575	0.00367	0.0365	0.0272	0.0283	0.0452	1	0.225	1					0.064	1	0.253	1	0.0952	1			0.168	0.258
REACTOME_PD1_SIGNALING	18	12	0.000143	0.0257	0.00028	0.00048	0.0383	0.0505	0.047	0.0078	0.942							0.0065	0.926	0.104	1	0.0125	0.961			0.109	0.105
PID_AVB3_OPN_PATHWAY	31	22	0.00085	0.0525	0.0455	0.00578	0.0389	0.0202	0.27	0.422	1	0.415	1					0.339	1	0.278	1					0.292
PID_HDAC_CLASSI_PATHWAY	66	48	0.000415	0.000725	0.0122	0.0244	0.0396	0.0425	0.0284	0.0404	1	0.218	1					0.0194	0.999	0.0562	1					0.029	0.074
BIOCARTA_INTRINSIC_PATHWAY	23	20	0.00616	0.279	0.103	0.00814	0.04	0.0281	0.118	0.621	1							0.713	1							0.283
PID_IL4_2PATHWAY	65	43	0.000389	0.031	0.0383	0.00694	0.0403	0.0461	0.509	0.0904	1	0.0532	1					0.158	1	0.0756	1					0.169
BIOCARTA_GLYCOLYSIS_PATHWAY	10	6	0.0456	0.0399	0.111	0.24	0.0406	0.0496	0.0847
REACTOME_BILE_ACID_AND_BILE_SALT_METABOLISM	27	24	0.00676	0.378	0.795	0.74	0.0408	0.0448	0.43
REACTOME_KINESINS	24	18	0.0128	0.0693	0.0328	0.00339	0.0418	0.074	0.281	0.0184	0.998	0.0024	0.593					0.0714	1	0.0183	0.996					0.055	0.166
PID_LIS1PATHWAY	28	22	0.00237	0.0112	0.0884	0.0653	0.0426	0.0252	0.0702	0.212	1	0.589	1					0.299	1	0.638	1					0.307	0.2
KEGG_ALLOGRAFT_REJECTION	38	24	0.000153	0.0253	1e-05	1e-05	0.0438	0.0642	0.232	0	0.137	0	0.095	0	0.092			0.0008	0.349	0.0009	0.333	0.0001	0.069	0.0078	0.765	0.00098	0.0236
REACTOME_REGULATION_OF_GLUCOKINASE_BY_GLUCOKINASE_REGULATORY_PROTEIN	27	22	0.00363	0.0934	0.0289	0.00483	0.0452	0.037	0.24																	0.696	0.205
REACTOME_GLYCEROPHOSPHOLIPID_BIOSYNTHESIS	82	65	0.000423	0.0169	0.174	0.0163	0.0463	0.0457	0.0698	0.861	1							0.858	1	0.736	1					0.829
REACTOME_METABOLISM_OF_CARBOHYDRATES	247	170	9.35e-07	0.0485	0.0454	0.0228	0.0467	0.0278	0.194	0.948	1	0.989	1	0.731	1	0.137	0.982	0.865	1	0.956	1	0.635	1	0.226	1	0.925	0.527
REACTOME_ACETYLCHOLINE_NEUROTRANSMITTER_RELEASE_CYCLE	10	7	0.00519	0.224	0.797	0.637	0.0474	0.0328	0.322
PID_INTEGRIN4_PATHWAY	11	10	0.0037	0.0625	0.146	0.0206	0.0477	0.024	0.17	0.252	1	0.302	1					0.106	1	0.101	1					0.098
REACTOME_GLUTAMATE_NEUROTRANSMITTER_RELEASE_CYCLE	15	13	0.00929	0.404	0.701	0.575	0.0483	0.0364	0.489
REACTOME_SIGNALING_BY_FGFR1_MUTANTS	30	27	0.000448	0.00787	0.00136	0.00147	0.0487	0.0489	0.109	0.069	1	0.009	0.942					0.121	1	0.0268	0.999					0.048	0.243
REACTOME_CELL_SURFACE_INTERACTIONS_AT_THE_VASCULAR_WALL	91	68	0.000986	0.01	0.00056	0.00021	0.0505	0.0521	0.214	0.246	1	0.234	1					0.302	1	0.364	1					0.277	0.504
KEGG_STEROID_BIOSYNTHESIS	17	13	0.0115	0.0148	0.0228	0.016	0.0508	0.0701	0.119	0.0664	1	0.0242	1					0.227	1	0.112	1					0.117	0.102
BIOCARTA_ASBCELL_PATHWAY	12	10	0.00132	0.0322	0.0303	0.00104	0.0519	0.0601	0.085	0.0486	1	0.0186	0.996					0.147	1	0.0534	1					0.094
BIOCARTA_NKT_PATHWAY	29	18	0.000663	0.00174	0.00033	3e-05	0.0524	0.0729	0.0341	0.004	0.802	0	0.095	0	0.092			0.0022	0.638	0.0001	0.0834	0.0001	0.069	0.0001	0.0492	0.0109	0.0008
REACTOME_SIGNALING_BY_FGFR3_MUTANTS	11	9	0.0127	0.0685	0.164	0.0683	0.0544	0.0795	0.169																	0.386
REACTOME_GLYCOSAMINOGLYCAN_METABOLISM	111	82	6e-05	0.149	0.122	0.142	0.0556	0.0236	0.235	0.943	1	0.994	1					0.946	1	0.992	1					0.989
BIOCARTA_NO2IL12_PATHWAY	17	12	0.00222	0.00688	0.00278	4e-05	0.0558	0.0585	0.026	0.0028	0.708	0.063	1	0.0042	0.718			0.0173	0.997	0.119	1	0.0118	0.954	0.0014	0.298	0.022	0.007
REACTOME_G_ALPHA1213_SIGNALLING_EVENTS	74	58	0.000497	0.00743	0.0176	0.00129	0.0568	0.0264	0.0861	0.0574	1	0.117	1					0.102	1	0.151	1					0.325
REACTOME_MITOTIC_PROMETAPHASE	87	70	0.000312	0.00353	0.00843	0.00044	0.0569	0.0716	0.142	0.0098	0.966	0.0326	1	0.0752	1			0.0013	0.469	0.0547	1	0.229	1			0.002	0.498
KEGG_VASOPRESSIN_REGULATED_WATER_REABSORPTION	44	30	7.34e-05	0.0812	0.0964	0.261	0.0574	0.0474	0.62	0.0174	0.997	0.189	1	0.007	0.851			0.0104	0.981	0.0158	0.994	0.0028	0.584			0.013	0.046
REACTOME_FACTORS_INVOLVED_IN_MEGAKARYOCYTE_DEVELOPMENT_AND_PLATELET_PRODUCTION	132	73	0.00401	0.0477	0.268	0.159	0.0577	0.0436	0.22	0.621	1	0.131	1	0.352	1			0.52	1	0.162	1	0.567	1			0.143	0.556
BIOCARTA_HER2_PATHWAY	22	18	0.000203	0.00116	0.00395	0.0128	0.0585	0.0299	0.0141	0.187	1	0.04	1					0.222	1	0.0536	1					0.05	0.165
REACTOME_MTORC1_MEDIATED_SIGNALLING	11	8	0.00587	0.57	0.616	0.322	0.0586	0.0539	0.935																	0.347
REACTOME_LAGGING_STRAND_SYNTHESIS	19	15	0.0381	0.0641	0.0398	0.0584	0.0603	0.0691	0.1
REACTOME_P75_NTR_RECEPTOR_MEDIATED_SIGNALLING	81	61	0.000219	0.00471	0.00311	6e-05	0.0605	0.0333	0.0328	0.0092	0.96	0.0154	0.99	0.12	1			0.0352	1	0.0346	1	0.159	1			0.193	0.452
REACTOME_TRAFFICKING_OF_GLUR2_CONTAINING_AMPA_RECEPTORS	16	12	0.00239	0.0132	0.0238	0.0145	0.0606	0.0233	0.0619	0.492	1	0.19	1	0.0694	1			0.474	1	0.189	1	0.0643	1			0.134	0.008
REACTOME_TELOMERE_MAINTENANCE	75	26	0.0292	0.061	0.047	0.0415	0.0611	0.0791	0.102
REACTOME_RNA_POL_I_PROMOTER_OPENING	62	5	0.0528	0.0543	0.374	0.203	0.0613	0.0933	0.0595
REACTOME_GLUTATHIONE_CONJUGATION	23	20	0.0823	0.549	0.547	0.183	0.0621	0.118	0.354																	0.641
REACTOME_THE_ROLE_OF_NEF_IN_HIV1_REPLICATION_AND_DISEASE_PATHOGENESIS	28	23	0.00228	0.0259	0.0139	0.00202	0.0627	0.0362	0.0712	0.072	1	0.054	1					0.0451	1	0.0741	1					0.11
PID_MYC_REPRESSPATHWAY	63	48	0.015	0.247	0.238	0.159	0.0628	0.085	0.458	0.478	1							0.761	1							0.42
REACTOME_ANTIGEN_PRESENTATION_FOLDING_ASSEMBLY_AND_PEPTIDE_LOADING_OF_CLASS_I_MHC	21	14	6.63e-05	0.0022	0.00995	0.00114	0.063	0.0704	0.00553	0.002	0.609	0.043	1					0.0008	0.349	0.0069	0.914	0.0004	0.15			0.031	0.156
REACTOME_IMMUNOREGULATORY_INTERACTIONS_BETWEEN_A_LYMPHOID_AND_A_NON_LYMPHOID_CELL	70	34	0.0139	0.00121	0.0002	0.00047	0.0633	0.0898	0.0226	0.0012	0.471	0.0472	1					0.0025	0.672	0.0669	1	0.0887	1			0.019
REACTOME_TIGHT_JUNCTION_INTERACTIONS	29	17	0.0104	0.314	0.264	0.0654	0.0634	0.0597	0.355
REACTOME_REGULATORY_RNA_PATHWAYS	26	15	0.00952	0.364	0.224	0.0588	0.0636	0.0462	0.383	0.212	1	0.0868	1					0.309	1	0.15	1					0.152	0.133
PID_MYC_ACTIVPATHWAY	79	56	0.00867	0.015	0.137	0.0453	0.0648	0.0871	0.0158	0.113	1	0.0604	1					0.174	1	0.0849	1					0.162
PID_RHODOPSIN_PATHWAY	24	18	0.00536	0.0772	0.0383	0.0752	0.0656	0.0755	0.712	0.243	1	0.098	1					0.129	1	0.0431	1					0.245
KEGG_STARCH_AND_SUCROSE_METABOLISM	52	41	0.00452	0.475	0.53	0.396	0.066	0.0664	0.329									0.569	1	0.243	1					0.826	0.279
REACTOME_GAP_JUNCTION_ASSEMBLY	18	8	0.0478	0.03	0.0238	0.0307	0.0679	0.104	0.12																	0.313
REACTOME_HS_GAG_DEGRADATION	20	15	0.00251	0.19	0.185	0.371	0.0686	0.0324	0.341	0.623	1	0.684	1					0.647	1	0.659	1
REACTOME_PRE_NOTCH_TRANSCRIPTION_AND_TRANSLATION	29	24	0.000795	0.00347	0.0229	0.0157	0.0691	0.0469	0.00793	0.0314	0.999	0.0032	0.687					0.0193	0.999	0.0005	0.228					0.007	0.225
REACTOME_ABACAVIR_TRANSPORT_AND_METABOLISM	10	9	0.0201	0.0983	0.0519	0.00979	0.0691	0.0648	0.0942																	0.4	0.079
REACTOME_TRANSLOCATION_OF_ZAP_70_TO_IMMUNOLOGICAL_SYNAPSE	14	10	0.000214	0.0462	0.00013	0.00032	0.0694	0.0874	0.119	0.002	0.609							0.0021	0.622	0.0631	1	0.0064	0.831			0.074	0.094
BIOCARTA_MTA3_PATHWAY	19	9	0.0351	0.17	0.158	0.0798	0.0705	0.0874	0.338																	0.387
KEGG_RIBOSOME	88	41	0.164	0.261	0.291	0.126	0.0728	0.221	0.366									0.73	1	0.498	1					0.88
KEGG_ASTHMA	30	18	0.000549	0.00676	5e-05	5e-05	0.073	0.112	0.0434	0.0058	0.894	0.0168	0.992	0.001	0.306			0.0686	1	0.0936	1	0.0047	0.745	0.0062	0.697	0.206	0.157
REACTOME_SHC1_EVENTS_IN_ERBB4_SIGNALING	20	16	0.00218	0.00479	0.0163	0.0134	0.0737	0.031	0.029	0.0356	1	0.04	1					0.0742	1	0.0599	1					0.188
REACTOME_DOPAMINE_NEUROTRANSMITTER_RELEASE_CYCLE	11	9	0.0028	0.334	0.806	0.598	0.0739	0.0399	0.461
PID_MTOR_4PATHWAY	69	53	0.000168	0.0202	0.143	0.0275	0.074	0.0724	0.291	0.561	1	0.405	1					0.653	1	0.503	1					0.503	0.418
PID_ERBB4_PATHWAY	38	34	0.000104	0.00366	0.0197	0.0135	0.0748	0.0141	0.105	0.654	1	0.431	1					0.684	1	0.439	1					0.488
REACTOME_CS_DS_DEGRADATION	12	8	0.0265	0.229	0.845	0.736	0.0752	0.0834	0.269
REACTOME_SIGNALING_BY_TGF_BETA_RECEPTOR_COMPLEX	63	46	0.000106	0.178	0.469	0.178	0.077	0.0727	0.681	0.809	1	0.51	1					0.319	1	0.684	1					0.663
SA_G2_AND_M_PHASES	8	7	0.0186	0.22	0.556	0.281	0.0787	0.0724	0.262
REACTOME_UNBLOCKING_OF_NMDA_RECEPTOR_GLUTAMATE_BINDING_AND_ACTIVATION	15	13	0.00133	0.000152	0.00335	0.00029	0.0809	0.0293	0.000705	0.128	1	0.291	1					0.0571	1	0.11	1					0.136	0.121
REACTOME_ADHERENS_JUNCTIONS_INTERACTIONS	27	25	0.00108	0.188	0.589	0.418	0.0812	0.0139	0.16	0.508	1	0.557	1					0.778	1	0.832	1					0.128
PID_CXCR4_PATHWAY	102	87	1.97e-05	0.00016	0.00799	0.00026	0.0813	0.0629	0.07	0.386	1	0.802	1	0.31	1			0.251	1	0.315	1	0.358	1			0.286	0.604
REACTOME_NOREPINEPHRINE_NEUROTRANSMITTER_RELEASE_CYCLE	10	8	0.00904	0.257	0.836	0.695	0.0835	0.0631	0.413
PID_E2F_PATHWAY	74	55	0.00212	0.00761	0.0222	0.0361	0.0838	0.106	0.157	0.0364	1	0.0164	0.991					0.0362	1	0.0057	0.873					0.115	0.415
REACTOME_ION_TRANSPORT_BY_P_TYPE_ATPASES	34	27	0.00232	0.00952	0.083	0.00532	0.0846	0.0439	0.0803	0.0626	1	0.0198	0.997	0.129	1			0.0403	1	0.0332	1	0.171	1			0.159
ST_WNT_CA2_CYCLIC_GMP_PATHWAY	20	18	0.000204	3.27e-05	0.00162	0.00147	0.0849	0.0512	0.0569	0.0498	1	0.0408	1	0.057	1			0.0253	1	0.0162	0.995	0.0758	1			0.012	0.015
PID_ARF6DOWNSTREAMPATHWAY	15	11	0.0101	0.121	0.0622	0.135	0.0853	0.0649	0.203	0.514	1	0.264	1					0.567	1	0.3	1					0.429
KEGG_ANTIGEN_PROCESSING_AND_PRESENTATION	89	40	0.000678	0.118	0.00014	0.0001	0.0861	0.154	0.352	0.0002	0.195	0.0214	0.999	0.0102	0.917			0.0382	1	0.168	1	0.0019	0.472			0.041	0.316
PID_ARF_3PATHWAY	19	13	0.0415	0.126	0.369	0.336	0.0861	0.0919	0.102																	0.137
REACTOME_SYNTHESIS_OF_PC	18	13	0.0509	0.0558	0.319	0.1	0.0861	0.0745	0.0333
REACTOME_TRANSPORT_OF_VITAMINS_NUCLEOSIDES_AND_RELATED_MOLECULES	31	23	0.0164	0.402	0.457	0.515	0.087	0.0722	0.251
REACTOME_GLUCURONIDATION	18	15	0.0143	0.134	0.226	0.425	0.0881	0.104	0.165
REACTOME_REMOVAL_OF_THE_FLAP_INTERMEDIATE_FROM_THE_C_STRAND	10	8	0.0444	0.0403	0.0477	0.101	0.0881	0.104	0.124
REACTOME_CELL_JUNCTION_ORGANIZATION	78	60	0.000156	0.0717	0.385	0.101	0.0883	0.0287	0.188	0.4	1	0.541	1					0.565	1	0.669	1					0.171
REACTOME_SIGNALING_BY_FGFR1_FUSION_MUTANTS	19	18	0.00231	0.0245	0.00167	0.00236	0.0895	0.0723	0.129	0.125	1	0.0326	1					0.15	1	0.0445	1					0.064	0.162
REACTOME_ACYL_CHAIN_REMODELLING_OF_PG	16	15	0.0194	0.113	0.376	0.283	0.0904	0.13	0.223
REACTOME_DNA_REPLICATION	192	141	0.000396	0.000949	0.00357	0.00047	0.0907	0.153	0.0764	0.0514	1	0.043	1	0.205	1			0.0324	1	0.172	1	0.541	1			0.021	0.769
REACTOME_PROCESSIVE_SYNTHESIS_ON_THE_LAGGING_STRAND	15	11	0.0621	0.0199	0.0138	0.0243	0.0931	0.107	0.0441
PID_P38ALPHABETAPATHWAY	31	26	0.00571	0.0677	0.0647	0.0146	0.0948	0.0621	0.205									0.875	1	0.625	1
KEGG_GLYCOLYSIS_GLUCONEOGENESIS	62	44	0.00608	0.0171	0.0348	0.0747	0.096	0.146	0.0706									0.606	1	0.554	1					0.898	0.344
REACTOME_PEPTIDE_CHAIN_ELONGATION	153	39	0.233	0.414	0.436	0.306	0.096	0.262	0.511									0.699	1	0.459	1
PID_BMPPATHWAY	42	36	0.00146	0.153	0.166	0.0386	0.0968	0.108	0.586									0.351	1							0.824
REACTOME_SYNTHESIS_OF_PA	27	23	0.0027	0.0491	0.12	0.0433	0.0979	0.1	0.166	0.545	1							0.416	1	0.432	1
REACTOME_PYRUVATE_METABOLISM	19	14	0.00516	0.008	0.0436	0.00631	0.0991	0.164	0.0209																	0.506	0.139
REACTOME_COPI_MEDIATED_TRANSPORT	10	8	0.103	0.0968	0.17	0.166	0.0994	0.116	0.0292																	0.337
REACTOME_INFLUENZA_VIRAL_RNA_TRANSCRIPTION_AND_REPLICATION	169	47	0.191	0.391	0.259	0.228	0.1	0.24	0.562	0.215	1	0.0884	1					0.389	1	0.146	1					0.685
REACTOME_GLUCOSE_TRANSPORT	38	30	0.0085	0.0626	0.0261	0.0161	0.101	0.0904	0.182																	0.777	0.271
PID_MET_PATHWAY	80	66	0.000599	0.195	0.0607	0.00153	0.102	0.0582	0.578	0.348	1	0.115	1					0.313	1	0.17	1					0.122	0.512
REACTOME_SIGNALING_BY_NOTCH	103	78	0.00147	0.0638	0.184	0.138	0.103	0.0803	0.0944	0.287	1	0.167	1					0.304	1	0.156	1					0.043	0.516
PID_IL12_STAT4PATHWAY	33	26	0.00327	0.172	0.00091	0.00035	0.104	0.112	0.385	0.0004	0.267	0.0016	0.467	0.0222	0.985			0.0019	0.589	0.0021	0.575	0.0787	1			0.002	0.222
KEGG_REGULATION_OF_ACTIN_CYTOSKELETON	216	172	3.31e-06	0.000577	0.0455	0.00673	0.105	0.0543	0.123	0.812	1	0.994	1					0.796	1	0.95	1					0.629
REACTOME_CELL_DEATH_SIGNALLING_VIA_NRAGE_NRIF_AND_NADE	60	50	0.00057	0.00546	0.0159	0.00057	0.105	0.06	0.083	0.0048	0.85	0.0184	0.996	0.275	1			0.0158	0.995	0.028	1	0.298	1			0.098	0.403
REACTOME_DEPOSITION_OF_NEW_CENPA_CONTAINING_NUCLEOSOMES_AT_THE_CENTROMERE	64	20	0.0123	0.00224	0.153	0.0221	0.106	0.124	0.103																	0.667	0.196
KEGG_GLYCOSYLPHOSPHATIDYLINOSITOL_GPI_ANCHOR_BIOSYNTHESIS	25	20	0.114	0.405	0.378	0.303	0.107	0.147	0.236																	0.63
BIOCARTA_ARAP_PATHWAY	18	14	0.0354	0.2	0.241	0.107	0.107	0.109	0.371																	0.527
REACTOME_MHC_CLASS_II_ANTIGEN_PRESENTATION	91	72	7.14e-06	0.0045	0.0243	0.00182	0.107	0.128	0.26	0.0114	0.983	0.025	1	0.0024	0.531			0.0169	0.997	0.0154	0.993	0.0009	0.272			0.07	0.006
PID_HES_HEYPATHWAY	48	34	0.00207	0.00216	0.00231	0.015	0.108	0.0816	0.00725	0.354	1	0.0972	1	0.0806	1			0.497	1	0.185	1	0.138	1			0.081	0.055
REACTOME_NRAGE_SIGNALS_DEATH_THROUGH_JNK	43	39	0.000355	0.00674	0.0169	0.00061	0.109	0.048	0.0714	0.0074	0.937	0.0392	1					0.0164	0.996	0.0465	1					0.123
BIOCARTA_IL3_PATHWAY	15	8	0.00297	0.000126	0.00015	4e-05	0.11	0.0921	0.0153	0.0774	1	0.0286	1					0.0207	0.999	0.0028	0.665					0.052
REACTOME_NEUROTRANSMITTER_RELEASE_CYCLE	34	29	0.00962	0.311	0.689	0.403	0.111	0.0812	0.452									0.926	1	0.742	1					0.787
PID_NFKAPPABCANONICALPATHWAY	23	17	0.00887	0.153	1e-05	3e-05	0.112	0.107	0.137	0.439	1	0.204	1	0.02	0.979	0.0022	0.362	0.52	1							0.212	0.011
REACTOME_ELONGATION_ARREST_AND_RECOVERY	32	19	0.0827	0.286	0.16	0.0898	0.112	0.12	0.144									0.373	1							0.618
PID_ALPHASYNUCLEIN_PATHWAY	33	29	0.00619	0.11	0.329	0.194	0.113	0.0737	0.293	0.913	1							0.786	1	0.727	1
BIOCARTA_AMI_PATHWAY	20	16	0.0196	0.544	0.189	0.0238	0.114	0.1	0.331	0.52	1							0.584	1							0.172
REACTOME_SIGNALING_BY_INSULIN_RECEPTOR	108	85	0.000205	0.214	0.252	0.0979	0.114	0.111	0.597	0.596	1	0.355	1					0.834	1	0.605	1					0.258	0.57
KEGG_SPHINGOLIPID_METABOLISM	40	28	0.00409	0.000625	0.015	0.0106	0.115	0.108	0.0134	0.0508	1	0.0062	0.872					0.153	1	0.0293	1					0.01
REACTOME_BILE_SALT_AND_ORGANIC_ANION_SLC_TRANSPORTERS	11	8	0.0338	0.00637	0.008	0.00829	0.115	0.122	0.0105	0.107	1							0.146	1							0.327
BIOCARTA_MITOCHONDRIA_PATHWAY	21	15	0.0527	0.184	0.492	0.361	0.118	0.112	0.0785																	0.534
REACTOME_NUCLEAR_SIGNALING_BY_ERBB4	38	30	0.000381	0.0437	0.0388	0.0165	0.118	0.0394	0.246	0.553	1	0.422	1					0.647	1	0.489	1					0.797
REACTOME_CGMP_EFFECTS	19	18	0.0028	0.127	0.468	0.246	0.119	0.0498	0.352	0.799	1	0.759	1					0.606	1	0.499	1					0.6
REACTOME_DNA_STRAND_ELONGATION	30	23	0.0487	0.0658	0.0484	0.0961	0.119	0.152	0.0757
REACTOME_SLC_MEDIATED_TRANSMEMBRANE_TRANSPORT	241	197	1.5e-05	0.0182	0.0119	0.0137	0.12	0.0799	0.23	0.722	1	0.412	1	0.506	1	0.146	0.984	0.948	1	0.781	1	0.861	1	0.227	1	0.647	0.362
KEGG_LONG_TERM_DEPRESSION	70	63	0.00025	0.0133	0.00345	0.0852	0.121	0.0402	0.0442	0.849	1	0.81	1	0.284	1			0.768	1	0.816	1	0.276	1			0.204	0.134
PID_HIVNEFPATHWAY	35	23	0.00798	0.028	0.256	0.101	0.121	0.122	0.0362	0.469	1							0.723	1							0.295
REACTOME_PACKAGING_OF_TELOMERE_ENDS	48	7	0.185	0.465	0.845	0.548	0.121	0.152	0.286
KEGG_VIRAL_MYOCARDITIS	73	55	0.000297	0.0362	0.0499	0.015	0.122	0.0906	0.32	0.0068	0.922	0.016	0.991	0.0436	1			0.0247	1	0.0252	0.999	0.0054	0.781	0.0362	0.973	0.027	0.019
PID_P75NTRPATHWAY	69	48	0.026	0.0843	0.00614	0.025	0.123	0.156	0.0252	0.443	1	0.164	1	0.054	1			0.711	1	0.34	1	0.149	1			0.245	0.087
REACTOME_SEMA4D_IN_SEMAPHORIN_SIGNALING	32	25	0.102	0.169	0.245	0.353	0.123	0.114	0.269
REACTOME_MEIOTIC_SYNAPSIS	73	25	0.12	0.963	0.997	0.975	0.124	0.109	0.897
PID_INTEGRIN3_PATHWAY	43	34	0.00494	0.314	0.279	0.111	0.125	0.115	0.544									0.805	1	0.486	1					0.825
REACTOME_3_UTR_MEDIATED_TRANSLATIONAL_REGULATION	176	52	0.141	0.416	0.237	0.265	0.125	0.318	0.706									0.598	1	0.301	1
BIOCARTA_IL12_PATHWAY	23	18	0.000744	0.0392	0.0244	0.00351	0.126	0.0884	0.208	0.004	0.802	0.136	1	0.0574	1			0.0332	1	0.222	1	0.0841	1	0.0093	0.811	0.055	0.011
PID_SYNDECAN_1_PATHWAY	46	40	0.00356	0.0051	0.0507	0.00702	0.126	0.0995	0.0199	0.0184	0.998	0.0556	1					0.0284	1	0.151	1					0.014	0.346
REACTOME_INTRINSIC_PATHWAY_FOR_APOPTOSIS	30	22	0.0209	0.0946	0.143	0.303	0.126	0.129	0.117																	0.678
PID_P38GAMMADELTAPATHWAY	11	10	0.0456	0.0835	0.00043	0.0992	0.127	0.129	0.187																	0.412	0.085
PID_CDC42_REG_PATHWAY	30	26	0.00548	0.137	0.172	0.0262	0.128	0.068	0.284	0.277	1	0.158	1					0.289	1	0.169	1					0.136
REACTOME_G1_PHASE	38	27	0.0101	0.0761	0.121	0.139	0.128	0.145	0.189									0.494	1							0.401
PID_GMCSF_PATHWAY	37	25	0.0224	0.0646	0.0011	0.00097	0.129	0.101	0.132	0.0332	0.999	0.0194	0.997					0.0299	1	0.0142	0.99	0.0714	1	0.0109	0.842	0.032	0.205
PID_INTEGRIN_CS_PATHWAY	26	25	0.0578	0.0885	0.067	0.193	0.129	0.0987	0.391	0.765	1							0.798	1							0.727
PID_RAC1_REG_PATHWAY	38	33	0.000682	0.0381	0.025	0.0034	0.129	0.0286	0.169	0.0876	1	0.176	1					0.0979	1	0.18	1					0.238
REACTOME_PLATELET_ADHESION_TO_EXPOSED_COLLAGEN	12	9	0.0642	0.202	0.0669	0.107	0.13	0.111	0.28	0.294	1	0.121	1					0.47	1	0.271	1					0.069	0.071
REACTOME_BINDING_AND_ENTRY_OF_HIV_VIRION	10	2	0.0757	0.265	0.275	0.156	0.13	0.122	0.281
REACTOME_OPSINS	10	6	0.0609	0.176	0.296	0.189	0.131	0.178	0.238																	0.259
PID_ERBB2ERBB3PATHWAY	44	33	0.00302	0.00263	0.00256	0.0255	0.132	0.0946	0.102	0.125	1	0.081	1					0.209	1	0.126	1	0.127	1			0.221	0.277
REACTOME_INFLUENZA_LIFE_CYCLE	203	71	0.0537	0.285	0.142	0.0915	0.132	0.243	0.604	0.634	1	0.329	1					0.577	1	0.41	1					0.88
KEGG_TYPE_I_DIABETES_MELLITUS	44	28	0.000433	0.205	0.00137	0.00028	0.133	0.142	0.739	0	0.137	0	0.095	0.0028	0.576			0.0007	0.318	0.0002	0.124	0.0002	0.0936	0.0146	0.895	0.00037	0.0319
REACTOME_GRB2_EVENTS_IN_ERBB2_SIGNALING	22	19	0.0034	0.00349	0.0143	0.0246	0.133	0.0618	0.0298	0.096	1	0.079	1					0.148	1	0.106	1					0.232
REACTOME_NONSENSE_MEDIATED_DECAY_ENHANCED_BY_THE_EXON_JUNCTION_COMPLEX	176	52	0.193	0.724	0.815	0.656	0.136	0.297	0.809									0.673	1	0.658	1					0.925
REACTOME_EXTENSION_OF_TELOMERES	27	19	0.0477	0.0401	0.0203	0.0273	0.136	0.152	0.128
BIOCARTA_EIF4_PATHWAY	24	19	0.0146	0.497	0.641	0.53	0.137	0.0989	0.826																	0.636
PID_AJDISS_2PATHWAY	48	43	0.00435	0.0996	0.0815	0.101	0.137	0.0724	0.478	0.695	1	0.432	1					0.573	1	0.479	1					0.643
PID_SMAD2_3PATHWAY	17	13	0.0174	0.75	0.737	0.628	0.138	0.116	0.907									0.296	1							0.487
REACTOME_PRE_NOTCH_PROCESSING_IN_GOLGI	16	13	0.00568	0.0252	0.0494	0.0124	0.138	0.14	0.0371	0.0284	0.999							0.0611	1							0.022
REACTOME_GLUCOSE_METABOLISM	69	44	0.0044	0.211	0.14	0.0433	0.138	0.153	0.291	0.652	1							0.243	1	0.58	1					0.376	0.332
REACTOME_SIGNAL_ATTENUATION	14	10	0.00935	0.0152	0.0434	0.0199	0.139	0.108	0.0644																	0.086
REACTOME_SIGNAL_TRANSDUCTION_BY_L1	34	27	0.00153	0.0502	0.149	0.179	0.141	0.0698	0.303
REACTOME_METABOLISM_OF_PROTEINS	518	279	0.000111	0.00286	0.00043	0.00067	0.142	0.288	0.0903	0.351	1	0.65	1	0.502	1			0.167	1	0.534	1	0.262	1			0.292	0.553
BIOCARTA_IL5_PATHWAY	10	6	0.01	0.111	0.0268	0.00641	0.143	0.145	0.215																	0.278
REACTOME_INITIAL_TRIGGERING_OF_COMPLEMENT	16	9	0.0175	0.00521	0.0449	0.0637	0.143	0.172	0.0224	0.0366	1							0.0948	1							0.064
PID_MYC_PATHWAY	25	21	0.0422	0.489	0.554	0.381	0.144	0.146	0.258									0.463	1	0.236	1					0.643
REACTOME_COSTIMULATION_BY_THE_CD28_FAMILY	63	49	0.00168	0.167	0.00721	0.00091	0.144	0.13	0.319	0.069	1	0.25	1					0.0044	0.837	0.0244	0.999	0.146	1			0.085	0.403
KEGG_ARACHIDONIC_ACID_METABOLISM	58	48	0.269	0.556	0.721	0.784	0.146	0.234	0.671
BIOCARTA_COMP_PATHWAY	19	14	0.00747	0.0214	0.138	0.0748	0.146	0.147	0.165	0.0602	1							0.116	1							0.027	0.131
KEGG_FC_EPSILON_RI_SIGNALING_PATHWAY	79	64	0.0211	0.0293	0.0455	0.0193	0.148	0.108	0.0548	0.784	1	0.756	1					0.773	1	0.695	1					0.624
BIOCARTA_CHREBP2_PATHWAY	42	29	0.00208	0.104	0.148	0.0792	0.148	0.123	0.14	0.0686	1	0.157	1	0.0054	0.788			0.0519	1	0.232	1	0.0124	0.959			0.005	0.03
REACTOME_SMAD2_SMAD3_SMAD4_HETEROTRIMER_REGULATES_TRANSCRIPTION	27	17	0.0243	0.067	0.126	0.0723	0.149	0.17	0.351	0.208	1	0.0796	1					0.366	1	0.152	1					0.214
REACTOME_OXYGEN_DEPENDENT_PROLINE_HYDROXYLATION_OF_HYPOXIA_INDUCIBLE_FACTOR_ALPHA	18	12	0.0343	0.0492	0.00895	0.0318	0.149	0.175	0.273																	0.466	0.102
BIOCARTA_CYTOKINE_PATHWAY	22	12	0.0259	0.0758	0.0542	0.0106	0.15	0.205	0.299									0.256	1	0.109	1	0.0203	0.993	0.001	0.244	0.469	0.101
PID_HIF1APATHWAY	19	14	0.0329	0.0864	0.00233	0.019	0.15	0.198	0.162																	0.517	0.139
REACTOME_G0_AND_EARLY_G1	25	19	0.0574	0.158	0.217	0.365	0.15	0.182	0.392																	0.601
KEGG_BETA_ALANINE_METABOLISM	22	19	0.0199	0.917	0.502	0.782	0.152	0.141	0.93
BIOCARTA_RAC1_PATHWAY	23	21	0.00868	0.056	0.26	0.112	0.152	0.128	0.239									0.621	1	0.359	1					0.663
PID_INTEGRIN1_PATHWAY	66	58	0.000322	0.00788	0.157	0.0118	0.152	0.0818	0.104	0.573	1	0.617	1					0.272	1	0.12	1					0.154
REACTOME_CHONDROITIN_SULFATE_BIOSYNTHESIS	21	14	0.0217	0.19	0.149	0.121	0.152	0.127	0.335	0.58	1							0.646	1
REACTOME_FORMATION_OF_FIBRIN_CLOT_CLOTTING_CASCADE	32	21	0.026	0.325	0.292	0.162	0.152	0.133	0.35	0.498	1							0.682	1							0.288	0.178
REACTOME_PTM_GAMMA_CARBOXYLATION_HYPUSINE_FORMATION_AND_ARYLSULFATASE_ACTIVATION	27	18	0.0253	0.317	0.249	0.148	0.153	0.195	0.58	0.0864	1							0.152	1							0.242
REACTOME_RESOLUTION_OF_AP_SITES_VIA_THE_MULTIPLE_NUCLEOTIDE_PATCH_REPLACEMENT_PATHWAY	17	11	0.0728	0.149	0.104	0.127	0.153	0.201	0.208
REACTOME_SEMA3A_PLEXIN_REPULSION_SIGNALING_BY_INHIBITING_INTEGRIN_ADHESION	13	10	0.0587	0.277	0.259	0.254	0.153	0.106	0.322
REACTOME_SIGNALING_BY_RHO_GTPASES	113	94	1.38e-05	0.0489	0.0948	0.00662	0.154	0.0447	0.462	0.196	1	0.497	1					0.263	1	0.561	1					0.331
REACTOME_NEGATIVE_REGULATION_OF_FGFR_SIGNALING	37	29	0.0144	0.111	0.124	0.0611	0.154	0.173	0.171	0.357	1	0.155	1					0.321	1	0.34	1					0.18
REACTOME_BOTULINUM_NEUROTOXICITY	19	13	0.0532	0.722	0.363	0.148	0.154	0.124	0.726																	0.498
KEGG_PENTOSE_AND_GLUCURONATE_INTERCONVERSIONS	28	19	0.0764	0.559	0.764	0.678	0.156	0.173	0.428
KEGG_NICOTINATE_AND_NICOTINAMIDE_METABOLISM	24	23	0.0454	0.458	0.64	0.54	0.156	0.168	0.507
KEGG_ONE_CARBON_POOL_BY_FOLATE	17	16	0.00718	0.024	0.366	0.0212	0.158	0.156	0.192	0.296	1	0.126	1					0.415	1	0.21	1					0.577	0.16
PID_TGFBRPATHWAY	55	42	0.00403	0.0207	0.0228	0.0146	0.158	0.117	0.0884	0.119	1	0.147	1					0.0681	1	0.315	1					0.167	0.347
REACTOME_ACTIVATION_OF_ATR_IN_RESPONSE_TO_REPLICATION_STRESS	38	31	0.0659	0.182	0.214	0.297	0.158	0.199	0.049
BIOCARTA_CSK_PATHWAY	24	19	0.000428	0.0697	0.0744	0.0116	0.159	0.119	0.213	0.0006	0.339	0.127	1					0.0037	0.789	0.187	1					0.014
REACTOME_SPHINGOLIPID_DE_NOVO_BIOSYNTHESIS	31	26	0.0785	0.174	0.325	0.248	0.159	0.112	0.198	0.578	1	0.536	1					0.673	1	0.647	1					0.376
KEGG_PHENYLALANINE_METABOLISM	18	13	0.0689	0.287	0.925	0.742	0.16	0.195	0.424																	0.469
KEGG_FOCAL_ADHESION	201	172	3.45e-06	0.000847	0.00785	0.00053	0.16	0.0584	0.0413	0.796	1	0.862	1					0.786	1	0.581	1					0.248	0.815
BIOCARTA_RAB_PATHWAY	12	10	0.0676	0.206	0.467	0.202	0.161	0.153	0.441									0.13	1							0.387
BIOCARTA_RB_PATHWAY	13	12	0.0475	0.0421	0.0875	0.0389	0.161	0.145	0.0791																	0.457
REACTOME_REGULATION_OF_HYPOXIA_INDUCIBLE_FACTOR_HIF_BY_OXYGEN	25	19	0.00777	0.00373	0.00449	0.00383	0.161	0.193	0.0658	0.137	1	0.0502	1					0.294	1	0.134	1					0.276	0.183
BIOCARTA_FAS_PATHWAY	30	25	0.0834	0.162	0.0711	0.0226	0.162	0.15	0.188	0.412	1	0.185	1					0.393	1	0.44	1					0.349
REACTOME_ACYL_CHAIN_REMODELLING_OF_PE	21	20	0.034	0.173	0.4	0.335	0.162	0.191	0.379																	0.66
REACTOME_HOST_INTERACTIONS_OF_HIV_FACTORS	132	88	0.00101	0.00815	0.0087	0.00116	0.162	0.17	0.366	0.2	1	0.157	1					0.137	1	0.409	1					0.254
REACTOME_TRANSPORT_OF_ORGANIC_ANIONS	11	9	0.0299	0.328	0.398	0.348	0.163	0.121	0.51
KEGG_FOLATE_BIOSYNTHESIS	11	5	0.0608	0.0676	0.0648	0.0668	0.164	0.182	0.0921																	0.244
REACTOME_SEMAPHORIN_INTERACTIONS	68	55	0.009	0.256	0.34	0.556	0.165	0.0972	0.467	0.976	1							0.955	1
REACTOME_METABOLISM_OF_PORPHYRINS	14	10	0.0018	0.0396	0.192	0.0305	0.165	0.191	0.138
BIOCARTA_STATHMIN_PATHWAY	19	15	0.00326	0.113	0.0318	0.0173	0.166	0.157	0.231	0.0218	0.998	0.166	1					0.0626	1	0.253	1					0.039	0.145
REACTOME_SIGNALING_BY_ACTIVATED_POINT_MUTANTS_OF_FGFR1	11	9	0.0398	0.0809	0.211	0.166	0.166	0.21	0.298																	0.37
REACTOME_BIOLOGICAL_OXIDATIONS	139	112	0.0355	0.248	0.285	0.287	0.166	0.284	0.637	0.945	1	0.742	1					0.994	1	0.928	1					0.985
REACTOME_FGFR1_LIGAND_BINDING_AND_ACTIVATION	14	11	0.0382	0.0846	0.324	0.19	0.167	0.213	0.282																	0.41
KEGG_GLYCOSPHINGOLIPID_BIOSYNTHESIS_GANGLIO_SERIES	15	11	0.0201	0.526	0.569	0.427	0.168	0.134	0.589																	0.428	0.113
REACTOME_SIGNALING_BY_FGFR_MUTANTS	44	39	0.00656	0.0497	0.00687	0.00967	0.168	0.175	0.246	0.173	1	0.0302	1					0.326	1	0.0919	1					0.132	0.334
KEGG_GLYCOSAMINOGLYCAN_BIOSYNTHESIS_CHONDROITIN_SULFATE	22	15	0.0365	0.124	0.0683	0.163	0.174	0.127	0.119	0.729	1							0.772	1
REACTOME_GLUCONEOGENESIS	34	18	0.0376	0.0485	0.0884	0.0316	0.176	0.179	0.202									0.111	1							0.608
REACTOME_P2Y_RECEPTORS	12	8	0.495	0.327	0.335	0.634	0.176	0.242	0.304
BIOCARTA_SODD_PATHWAY	10	4	0.16	0.149	0.383	0.299	0.177	0.212	0.063
BIOCARTA_NEUROTRANSMITTERS_PATHWAY	6	4	0.206	0.298	0.288	0.278	0.178	0.218	0.269
KEGG_VEGF_SIGNALING_PATHWAY	76	63	0.0439	0.0634	0.286	0.116	0.179	0.18	0.12	0.95	1							0.973	1							0.84	0.494
REACTOME_TRAFFICKING_OF_AMPA_RECEPTORS	28	22	0.0109	0.0418	0.00981	0.00353	0.18	0.0811	0.0952	0.318	1	0.187	1	0.13	1			0.309	1	0.188	1	0.129	1			0.079	0.019
REACTOME_PYRUVATE_METABOLISM_AND_CITRIC_ACID_TCA_CYCLE	48	34	0.00597	0.0544	0.163	0.103	0.184	0.233	0.14																	0.824	0.277
REACTOME_POL_SWITCHING	13	10	0.164	0.475	0.278	0.311	0.186	0.217	0.485
KEGG_RETINOL_METABOLISM	64	45	0.0787	0.292	0.714	0.556	0.188	0.27	0.77																	0.595
REACTOME_INTERFERON_SIGNALING	159	103	0.000327	0.0443	0.00109	3e-05	0.188	0.207	0.295	0.043	1	0.0152	0.989	0.0018	0.455	0.0184	0.816	0.0841	1	0.0127	0.986	0.0005	0.179	0.108	0.997	0.035	0.021
REACTOME_TRYPTOPHAN_CATABOLISM	11	10	0.0378	0.195	0.212	0.0365	0.188	0.182	0.236																	0.382
REACTOME_NEP_NS2_INTERACTS_WITH_THE_CELLULAR_EXPORT_MACHINERY	27	21	0.0215	0.228	0.109	0.111	0.191	0.175	0.522
KEGG_LYSOSOME	121	87	0.000275	0.0398	0.212	0.149	0.192	0.218	0.13	0.858	1							0.819	1	0.625	1					0.942
REACTOME_CYTOCHROME_P450_ARRANGED_BY_SUBSTRATE_TYPE	51	38	0.195	0.288	0.173	0.374	0.192	0.282	0.672																	0.864
BIOCARTA_P35ALZHEIMERS_PATHWAY	11	7	0.0407	0.0918	4e-05	0.00203	0.193	0.152	0.0384	0.177	1	0.0704	1	0.0054	0.788			0.236	1	0.106	1	0.011	0.943			0.0452	0.0021
BIOCARTA_LECTIN_PATHWAY	12	10	0.00829	0.0457	0.161	0.133	0.194	0.177	0.207	0.049	1							0.0928	1							0.013	0.088
PID_PTP1BPATHWAY	52	44	0.00185	0.00509	0.00097	0.0117	0.194	0.16	0.116	0.888	1	0.617	1					0.808	1	0.424	1					0.383	0.363
REACTOME_L1CAM_INTERACTIONS	86	73	0.00181	0.0641	0.368	0.369	0.194	0.0683	0.202									1	1
BIOCARTA_MTOR_PATHWAY	23	19	0.0273	0.672	0.569	0.358	0.196	0.221	0.87									0.272	1	0.13	1					0.646
REACTOME_ASSOCIATION_OF_TRIC_CCT_WITH_TARGET_PROTEINS_DURING_BIOSYNTHESIS	27	20	0.033	0.155	0.0844	0.0193	0.196	0.202	0.13																	0.64
REACTOME_SYNTHESIS_OF_BILE_ACIDS_AND_BILE_SALTS	19	16	0.161	0.511	0.645	0.765	0.197	0.229	0.337
REACTOME_BASIGIN_INTERACTIONS	30	19	0.0478	0.33	0.156	0.0256	0.198	0.239	0.729	0.131	1							0.328	1							0.634	0.19
REACTOME_AMYLOIDS	83	20	0.0353	0.0221	0.00109	0.00079	0.198	0.281	0.0617	0.289	1	0.126	1					0.303	1	0.344	1					0.243	0.179
KEGG_COMPLEMENT_AND_COAGULATION_CASCADES	69	54	0.00449	0.066	0.189	0.0628	0.199	0.196	0.284	0.229	1	0.59	1	0.0902	1			0.167	1	0.56	1	0.0444	1			0.047	0.102
PID_PDGFRBPATHWAY	129	106	0.00015	0.00185	0.00042	0.0003	0.199	0.131	0.0783	0.767	1	0.33	1	0.0604	1	0.0066	0.61	0.441	1	0.333	1	0.12	1	0.0123	0.864	0.102	0.089
REACTOME_MITOTIC_M_M_G1_PHASES	172	125	0.00153	0.000851	0.00367	0.0004	0.199	0.284	0.114	0.025	0.998	0.0246	1	0.17	1			0.0115	0.986	0.103	1	0.48	1			0.013	0.703
REACTOME_PECAM1_INTERACTIONS	10	9	0.0625	0.0644	0.0126	0.0283	0.201	0.184	0.164
SIG_CD40PATHWAYMAP	34	22	0.166	0.594	0.846	0.655	0.202	0.215	0.578
PID_AURORA_A_PATHWAY	31	20	0.24	0.787	0.75	0.702	0.202	0.199	0.9
REACTOME_REPAIR_SYNTHESIS_FOR_GAP_FILLING_BY_DNA_POL_IN_TC_NER	14	13	0.056	0.0541	0.056	0.101	0.202	0.209	0.2
BIOCARTA_SARS_PATHWAY	10	7	0.054	0.174	0.313	0.221	0.203	0.249	0.187
PID_WNT_SIGNALING_PATHWAY	28	16	0.055	0.0501	0.457	0.192	0.203	0.241	0.222	0.277	1	0.12	1					0.205	1	0.069	1					0.169	0.141
REACTOME_GLYCOLYSIS	29	17	0.0806	0.29	0.442	0.495	0.203	0.229	0.205									0.358	1							0.577
REACTOME_ION_CHANNEL_TRANSPORT	55	46	0.00168	0.00226	0.0106	0.00044	0.203	0.0981	0.0304	0.0726	1	0.0252	1	0.0176	0.973			0.0469	1	0.0396	1	0.0252	0.997			0.019	0.358
PID_HDAC_CLASSII_PATHWAY	34	26	0.00946	0.0373	0.257	0.342	0.204	0.169	0.295									0.79	1							0.71	0.209
REACTOME_CD28_DEPENDENT_VAV1_PATHWAY	11	11	0.105	0.086	0.00351	0.00384	0.204	0.174	0.0446	0.217	1	0.0822	1					0.246	1	0.107	1					0.099
REACTOME_PHASE1_FUNCTIONALIZATION_OF_COMPOUNDS	70	55	0.0978	0.163	0.227	0.437	0.205	0.299	0.561																	0.942
REACTOME_REGULATION_OF_IFNG_SIGNALING	14	9	0.109	0.233	0.00554	0.0008	0.205	0.224	0.567	0.096	1	0.037	1	0.002	0.477			0.206	1	0.0749	1	0.0091	0.916			0.055	0.001
PID_CDC42_PATHWAY	70	61	0.000465	0.0779	0.224	0.0191	0.208	0.139	0.522	0.869	1	0.704	1					0.639	1	0.344	1					0.584
REACTOME_ABCA_TRANSPORTERS_IN_LIPID_HOMEOSTASIS	18	14	0.0439	0.0537	0.142	0.0299	0.209	0.245	0.296	0.026	0.998	0.0638	1					0.0556	1	0.105	1					0.157
REACTOME_INTERACTIONS_OF_VPR_WITH_HOST_CELLULAR_PROTEINS	33	24	0.0159	0.119	0.0929	0.0722	0.21	0.204	0.447																	0.671
REACTOME_HEMOSTASIS	466	331	4.13e-06	0.000815	0.00408	0.00052	0.211	0.11	0.195	0.748	1	0.534	1	0.481	1	0.401	0.995	0.596	1	0.449	1	0.591	1	0.579	1	0.299	0.43
REACTOME_ACTIVATION_OF_BH3_ONLY_PROTEINS	17	12	0.0657	0.0952	0.0685	0.273	0.211	0.236	0.2																	0.489
REACTOME_ACTIVATION_OF_CHAPERONE_GENES_BY_XBP1S	46	32	0.209	0.482	0.258	0.257	0.214	0.269	0.449	0.362	1							0.179	1							0.46
REACTOME_TRANSLATION	222	82	0.289	0.398	0.0997	0.271	0.215	0.469	0.76									0.346	1	0.356	1					0.986
KEGG_DNA_REPLICATION	36	25	0.0652	0.0634	0.033	0.0689	0.216	0.265	0.162
REACTOME_NUCLEOTIDE_LIKE_PURINERGIC_RECEPTORS	16	12	0.486	0.462	0.341	0.533	0.216	0.281	0.526
REACTOME_ALPHA_LINOLENIC_ACID_ALA_METABOLISM	12	11	0.16	0.373	0.495	0.479	0.217	0.222	0.14																	0.434
PID_BCR_5PATHWAY	65	49	0.007	0.0136	0.0312	0.00386	0.218	0.17	0.0354	0.411	1	0.232	1					0.369	1	0.339	1					0.09	0.413
PID_ATR_PATHWAY	39	37	0.0259	0.114	0.0721	0.0751	0.221	0.21	0.526	0.615	1							0.481	1							0.276
REACTOME_ACYL_CHAIN_REMODELLING_OF_PC	22	21	0.0474	0.258	0.562	0.504	0.221	0.25	0.503																	0.659
REACTOME_TRANSMEMBRANE_TRANSPORT_OF_SMALL_MOLECULES	413	333	8e-08	0.000108	0.00013	1e-05	0.221	0.121	0.0374	0.134	1	0.0548	1	0.0542	1	0.338	0.994	0.438	1	0.29	1	0.152	1	0.47	1	0.13	0.121
REACTOME_NITRIC_OXIDE_STIMULATES_GUANYLATE_CYCLASE	25	24	0.00868	0.203	0.521	0.336	0.223	0.11	0.458	0.883	1	0.83	1					0.732	1	0.591	1					0.712
BIOCARTA_CELLCYCLE_PATHWAY	23	18	0.0625	0.0357	0.0782	0.184	0.226	0.268	0.217																	0.62
REACTOME_INHIBITION_OF_REPLICATION_INITIATION_OF_DAMAGED_DNA_BY_RB1_E2F1	13	7	0.123	0.0911	0.0161	0.0256	0.227	0.214	0.0288									0.0621	1							0.052
REACTOME_FGFR2C_LIGAND_BINDING_AND_ACTIVATION	12	10	0.1	0.132	0.276	0.26	0.227	0.282	0.259																	0.397
REACTOME_ACYL_CHAIN_REMODELLING_OF_PS	15	14	0.0549	0.134	0.332	0.361	0.229	0.27	0.28
REACTOME_SIGNALLING_TO_ERKS	36	30	0.021	0.39	0.215	0.137	0.233	0.195	0.53	0.35	1	0.34	1					0.456	1	0.454	1					0.44
KEGG_MAPK_SIGNALING_PATHWAY	267	197	2.27e-05	0.0554	0.00597	0.117	0.234	0.131	0.593	0.96	1	0.881	1	0.85	1			0.967	1	0.918	1	0.548	1			0.871	0.546
REACTOME_GAMMA_CARBOXYLATION_TRANSPORT_AND_AMINO_TERMINAL_CLEAVAGE_OF_PROTEINS	11	6	0.126	0.683	0.607	0.373	0.235	0.304	0.78																	0.269
REACTOME_SYNTHESIS_OF_GLYCOSYLPHOSPHATIDYLINOSITOL_GPI	17	14	0.418	0.318	0.229	0.466	0.235	0.265	0.17																	0.498
REACTOME_TRIGLYCERIDE_BIOSYNTHESIS	38	30	0.00382	0.066	0.128	0.0183	0.236	0.168	0.385	0.175	1							0.136	1	0.375	1					0.042	0.264
REACTOME_POST_CHAPERONIN_TUBULIN_FOLDING_PATHWAY	19	8	0.29	0.523	0.531	0.526	0.236	0.269	0.392
REACTOME_INTERFERON_ALPHA_BETA_SIGNALING	64	33	0.0947	0.348	0.192	0.0198	0.236	0.283	0.488	0.0384	1	0.0356	1	0.0142	0.957			0.0629	1	0.0311	1	0.0021	0.5			0.074	0.275
KEGG_PRIMARY_BILE_ACID_BIOSYNTHESIS	16	13	0.245	0.415	0.457	0.621	0.237	0.269	0.218
KEGG_DRUG_METABOLISM_CYTOCHROME_P450	72	54	0.132	0.649	0.862	0.799	0.238	0.336	0.887
REACTOME_ACTIVATION_OF_NMDA_RECEPTOR_UPON_GLUTAMATE_BINDING_AND_POSTSYNAPTIC_EVENTS	37	32	0.00142	0.00372	0.00364	0.00085	0.238	0.117	0.0828	0.49	1	0.705	1					0.325	1	0.475	1					0.467	0.246
REACTOME_METABOLISM_OF_LIPIDS_AND_LIPOPROTEINS	478	383	8.79e-07	0.00229	0.00873	7e-05	0.239	0.229	0.215	0.243	1	0.501	1	0.664	1			0.229	1	0.202	1	0.466	1			0.137	0.745
SA_MMP_CYTOKINE_CONNECTION	15	9	0.0182	0.0593	0.108	0.0903	0.24	0.228	0.392									0.279	1							0.387
KEGG_DRUG_METABOLISM_OTHER_ENZYMES	51	36	0.151	0.494	0.33	0.69	0.243	0.263	0.876									0.47	1	0.453	1					0.778
REACTOME_SHC_MEDIATED_CASCADE	28	22	0.0725	0.0681	0.0614	0.025	0.243	0.284	0.123	0.247	1	0.0998	1					0.468	1	0.225	1					0.312
PID_REELINPATHWAY	29	25	0.00443	0.11	0.00048	0.0272	0.244	0.12	0.363	0.27	1	0.641	1					0.369	1	0.668	1					0.146	0.234
PID_FGF_PATHWAY	55	43	0.0219	0.195	0.205	0.0354	0.244	0.225	0.478	0.623	1	0.266	1					0.575	1	0.216	1					0.382
PID_KITPATHWAY	52	41	0.00104	0.00706	0.0109	0.00142	0.245	0.197	0.19	0.132	1	0.145	1					0.202	1	0.223	1					0.016	0.32
REACTOME_TGF_BETA_RECEPTOR_SIGNALING_IN_EMT_EPITHELIAL_TO_MESENCHYMAL_TRANSITION	16	10	0.047	0.406	0.735	0.637	0.245	0.212	0.583
BIOCARTA_CLASSIC_PATHWAY	14	10	0.0353	0.249	0.169	0.127	0.247	0.229	0.6	0.184	1							0.262	1							0.083	0.096
REACTOME_SRP_DEPENDENT_COTRANSLATIONAL_PROTEIN_TARGETING_TO_MEMBRANE	179	59	0.382	0.357	0.0384	0.203	0.247	0.5	0.609									0.501	1	0.409	1					0.951
KEGG_OTHER_GLYCAN_DEGRADATION	16	10	0.119	0.223	0.324	0.233	0.249	0.288	0.295																	0.398
KEGG_BIOSYNTHESIS_OF_UNSATURATED_FATTY_ACIDS	22	18	0.0946	0.558	0.856	0.614	0.249	0.218	0.417																	0.211
SIG_PIP3_SIGNALING_IN_CARDIAC_MYOCTES	67	53	0.00487	0.0273	0.0805	0.00591	0.249	0.15	0.381	0.207	1	0.303	1	0.278	1			0.278	1	0.342	1	0.3	1			0.277	0.426
PID_RAC1_PATHWAY	54	44	0.00203	0.0247	0.0231	0.00213	0.25	0.27	0.393	0.492	1	0.452	1					0.251	1	0.153	1	0.11	1			0.365	0.367
REACTOME_HS_GAG_BIOSYNTHESIS	31	26	0.0254	0.845	0.935	0.681	0.251	0.116	0.767	0.99	1							0.924	1	0.873	1
REACTOME_TANDEM_PORE_DOMAIN_POTASSIUM_CHANNELS	12	10	0.0663	0.534	0.286	0.0894	0.252	0.229	0.663																	0.404	0.099
REACTOME_TIE2_SIGNALING	17	12	0.0609	0.21	0.187	0.116	0.255	0.209	0.484																	0.419
KEGG_NEUROTROPHIN_SIGNALING_PATHWAY	126	99	0.0113	0.201	0.215	0.235	0.256	0.208	0.354	0.933	1	0.718	1	0.367	1			0.969	1	0.826	1	0.489	1			0.382	0.261
REACTOME_POST_TRANSLATIONAL_PROTEIN_MODIFICATION	188	138	7.88e-05	0.00126	0.00074	0.00269	0.257	0.223	0.0364	0.366	1	0.498	1	0.352	1			0.346	1	0.646	1	0.145	1			0.034	0.156
REACTOME_G1_S_SPECIFIC_TRANSCRIPTION	19	13	0.173	0.0525	0.0444	0.0782	0.257	0.33	0.106																	0.462
PID_ATF2_PATHWAY	59	42	0.0122	0.28	0.517	0.295	0.261	0.232	0.747	0.891	1	0.622	1					0.681	1	0.544	1	0.198	1			0.619	0.345
REACTOME_GROWTH_HORMONE_RECEPTOR_SIGNALING	24	15	0.118	0.663	0.0302	0.0919	0.261	0.224	0.876																	0.528	0.126
KEGG_UBIQUITIN_MEDIATED_PROTEOLYSIS	138	105	0.00639	0.608	0.113	0.118	0.262	0.242	0.996	0.0446	1	0.0138	0.986	0.0174	0.972			0.0425	1	0.0103	0.972	0.014	0.974	0.0505	0.987	0.172	0.02
PID_EPHA2_FWDPATHWAY	19	14	0.0611	0.0387	0.0344	0.00888	0.263	0.191	0.0423	0.268	1	0.0846	1					0.303	1	0.0842	1					0.51
KEGG_PEROXISOME	78	62	0.0602	0.157	0.0114	0.113	0.264	0.377	0.234	0.121	1	0.443	1					0.457	1	0.761	1					0.369	0.468
BIOCARTA_FEEDER_PATHWAY	9	6	0.00873	0.117	0.0272	0.00914	0.265	0.259	0.375																	0.274	0.068
REACTOME_PLATELET_AGGREGATION_PLUG_FORMATION	36	27	0.0495	0.0793	0.0226	0.00696	0.265	0.237	0.246	0.189	1	0.151	1					0.316	1	0.229	1					0.126	0.235
REACTOME_SPRY_REGULATION_OF_FGF_SIGNALING	14	10	0.0512	0.222	0.0517	0.0493	0.267	0.259	0.265									0.124	1							0.082
REACTOME_RAS_ACTIVATION_UOPN_CA2_INFUX_THROUGH_NMDA_RECEPTOR	17	14	0.0234	0.00874	0.0105	0.00459	0.267	0.174	0.0319	0.201	1							0.0923	1	0.533	1					0.503
REACTOME_N_GLYCAN_ANTENNAE_ELONGATION_IN_THE_MEDIAL_TRANS_GOLGI	18	15	0.0463	0.0717	0.00555	0.0712	0.271	0.185	0.136	0.314	1							0.204	1							0.172
BIOCARTA_DC_PATHWAY	22	13	0.145	0.0948	0.0376	0.00937	0.273	0.343	0.287									0.345	1	0.148	1	0.0176	0.99	0.0019	0.364	0.5	0.111
PID_TELOMERASEPATHWAY	68	53	0.0574	0.767	0.0956	0.429	0.273	0.251	0.794	0.332	1	0.175	1	0.119	1			0.348	1	0.18	1	0.22	1			0.116	0.099
REACTOME_PLATELET_SENSITIZATION_BY_LDL	16	12	0.14	0.478	0.623	0.669	0.273	0.254	0.25																	0.454
PID_RHOA_PATHWAY	45	37	0.00776	0.0215	0.0288	0.0126	0.274	0.26	0.326	0.553	1							0.461	1	0.374	1					0.574
REACTOME_THE_ACTIVATION_OF_ARYLSULFATASES	12	11	0.0869	0.26	0.222	0.137	0.278	0.281	0.397	0.261	1							0.285	1							0.435
BIOCARTA_IL6_PATHWAY	22	15	0.0473	0.00307	9e-05	0.00044	0.279	0.279	0.0331	0.0386	1	0.0088	0.937					0.0855	1	0.0231	0.999					0.032	0.146
REACTOME_SYNTHESIS_OF_BILE_ACIDS_AND_BILE_SALTS_VIA_7ALPHA_HYDROXYCHOLESTEROL	15	12	0.402	0.697	0.737	0.835	0.281	0.319	0.367
REACTOME_REGULATION_OF_RHEB_GTPASE_ACTIVITY_BY_AMPK	10	8	0.0406	0.0495	0.0589	0.0714	0.281	0.317	0.398	0.063	1							0.107	1							0.063	0.082
REACTOME_A_TETRASACCHARIDE_LINKER_SEQUENCE_IS_REQUIRED_FOR_GAG_SYNTHESIS	25	18	0.0428	0.602	0.854	0.625	0.282	0.205	0.733	0.87	1							0.864	1
KEGG_GLYCOSAMINOGLYCAN_BIOSYNTHESIS_KERATAN_SULFATE	15	10	0.147	0.171	0.101	0.0862	0.283	0.268	0.144																	0.404
BIOCARTA_GCR_PATHWAY	22	16	0.0476	0.189	0.12	0.0504	0.283	0.326	0.507	0.173	1							0.294	1							0.553
BIOCARTA_IL10_PATHWAY	17	14	0.0059	0.0228	0.00392	0.0167	0.285	0.331	0.181																	0.517	0.136
REACTOME_JNK_C_JUN_KINASES_PHOSPHORYLATION_AND_ACTIVATION_MEDIATED_BY_ACTIVATED_HUMAN_TAK1	16	13	0.0222	0.0104	1e-05	1e-05	0.285	0.275	0.363									0.356	1							0.532	0.127
KEGG_GNRH_SIGNALING_PATHWAY	101	80	0.00112	0.00901	0.0221	0.0339	0.286	0.183	0.192	0.494	1	0.209	1					0.52	1	0.223	1	0.299	1			0.1	0.56
KEGG_TYPE_II_DIABETES_MELLITUS	47	34	0.0214	0.152	0.0612	0.122	0.287	0.184	0.509	0.679	1							0.74	1							0.822
REACTOME_SYNTHESIS_OF_PIPS_AT_THE_EARLY_ENDOSOME_MEMBRANE	12	12	0.131	0.682	0.841	0.483	0.287	0.245	0.819									0.402	1							0.429
ST_DIFFERENTIATION_PATHWAY_IN_PC12_CELLS	45	30	0.0198	0.0513	0.00549	0.0036	0.289	0.244	0.718	0.0434	1	0.0204	0.998	0.01	0.913			0.0355	1	0.014	0.99	0.0033	0.635			0.062	0.248
REACTOME_FGFR_LIGAND_BINDING_AND_ACTIVATION	22	18	0.101	0.135	0.331	0.134	0.289	0.344	0.178																	0.605
BIOCARTA_DNAFRAGMENT_PATHWAY	10	5	0.173	0.102	0.162	0.256	0.29	0.343	0.156
REACTOME_SYNTHESIS_OF_VERY_LONG_CHAIN_FATTY_ACYL_COAS	14	12	0.0573	0.0895	0.101	0.0698	0.291	0.238	0.234	0.357	1							0.389	1							0.115	0.095
REACTOME_DEGRADATION_OF_THE_EXTRACELLULAR_MATRIX	29	20	0.0457	0.269	0.619	0.715	0.292	0.369	0.703
REACTOME_SEMA4D_INDUCED_CELL_MIGRATION_AND_GROWTH_CONE_COLLAPSE	27	21	0.303	0.482	0.385	0.588	0.292	0.268	0.559
ST_INTEGRIN_SIGNALING_PATHWAY	82	73	0.00442	0.075	0.233	0.126	0.293	0.171	0.377	0.882	1	0.974	1					0.918	1	0.919	1					0.88
REACTOME_BASE_EXCISION_REPAIR	19	13	0.147	0.217	0.14	0.216	0.293	0.346	0.239
KEGG_VASCULAR_SMOOTH_MUSCLE_CONTRACTION	115	95	0.000548	0.014	0.0464	0.0607	0.295	0.135	0.36	0.833	1	0.781	1					0.902	1	0.847	1	0.743	1			0.53
REACTOME_DOWNSTREAM_TCR_SIGNALING	37	25	0.00281	0.0578	0.00199	0.00315	0.295	0.287	0.0976	0.155	1							0.0508	1	0.375	1	0.0464	1			0.353	0.209
REACTOME_ACTIVATION_OF_RAC	14	13	0.027	0.113	0.135	0.0475	0.295	0.197	0.163	0.354	1	0.398	1					0.352	1	0.36	1					0.136
REACTOME_HEPARAN_SULFATE_HEPARIN_HS_GAG_METABOLISM	52	39	0.0148	0.585	0.411	0.574	0.296	0.16	0.643	0.984	1	0.945	1					0.928	1	0.812	1
KEGG_INSULIN_SIGNALING_PATHWAY	137	102	0.00067	0.381	0.57	0.282	0.297	0.294	0.762	0.718	1	0.601	1					0.785	1	0.759	1					0.408	0.625
KEGG_PRION_DISEASES	35	24	0.0223	0.3	0.0628	0.0334	0.297	0.254	0.634	0.755	1							0.815	1							0.696	0.192
REACTOME_TRANSPORT_OF_RIBONUCLEOPROTEINS_INTO_THE_HOST_NUCLEUS	27	21	0.048	0.285	0.125	0.153	0.297	0.265	0.485
PID_TCR_PATHWAY	66	55	0.0019	0.0778	0.0134	0.0129	0.298	0.23	0.242	0.3	1	0.236	1	0.231	1			0.268	1	0.155	1	0.27	1			0.057
KEGG_SNARE_INTERACTIONS_IN_VESICULAR_TRANSPORT	38	27	0.0797	0.589	0.405	0.318	0.299	0.326	0.852									0.731	1							0.746
REACTOME_REGULATION_OF_SIGNALING_BY_CBL	18	17	0.0506	0.0756	0.0241	0.0165	0.299	0.238	0.194	0.53	1							0.266	1	0.286	1					0.571
KEGG_TGF_BETA_SIGNALING_PATHWAY	86	60	0.00746	0.0877	0.202	0.101	0.3	0.314	0.222	0.338	1	0.181	1					0.272	1	0.395	1					0.074
PID_IL27PATHWAY	26	17	0.0256	0.0234	0.00011	0.00011	0.3	0.357	0.11	0.0432	1	0.0108	0.963	0.0002	0.136	0.0002	0.128	0.123	1	0.033	1	0.0009	0.272	0.0001	0.0492	0.052	0.00056
REACTOME_FRS2_MEDIATED_CASCADE	36	28	0.0638	0.107	0.144	0.0756	0.301	0.311	0.176	0.399	1	0.181	1					0.644	1	0.367	1					0.431
KEGG_DORSO_VENTRAL_AXIS_FORMATION	25	22	0.00429	0.09	0.0637	0.0841	0.302	0.206	0.374	0.41	1	0.141	1					0.491	1	0.192	1					0.094
REACTOME_LATE_PHASE_OF_HIV_LIFE_CYCLE	104	73	0.00721	0.0852	0.0934	0.00329	0.302	0.321	0.109	0.812	1	0.525	1					0.338	1	0.346	1					0.881
BIOCARTA_P27_PATHWAY	13	7	0.122	0.253	0.0606	0.175	0.304	0.303	0.284																	0.309
PID_PI3KCIPATHWAY	49	38	0.0411	0.0516	0.0174	0.00719	0.304	0.282	0.214	0.604	1							0.501	1	0.638	1					0.558
KEGG_N_GLYCAN_BIOSYNTHESIS	46	34	0.00339	0.000708	9e-05	0.00359	0.305	0.29	0.126	0.101	1	0.055	1	0.0548	1			0.139	1	0.188	1	0.0254	0.997			0.019	0.039
KEGG_ERBB_SIGNALING_PATHWAY	87	75	0.000359	0.00738	0.0189	0.0168	0.305	0.156	0.279	0.335	1	0.243	1					0.414	1	0.284	1					0.073	0.517
SIG_CHEMOTAXIS	45	38	0.0185	0.174	0.296	0.135	0.306	0.238	0.643	0.46	1							0.334	1	0.698	1					0.568
PID_CMYB_PATHWAY	84	62	0.0853	0.286	0.169	0.183	0.306	0.285	0.117	0.514	1	0.293	1					0.601	1	0.505	1					0.381
REACTOME_RIP_MEDIATED_NFKB_ACTIVATION_VIA_DAI	18	12	0.0816	0.053	0.00053	0.00125	0.306	0.365	0.0491	0.0854	1	0.0284	1					0.0831	1	0.018	0.996					0.113	0.109
REACTOME_CREATION_OF_C4_AND_C2_ACTIVATORS	10	6	0.094	0.0358	0.174	0.215	0.306	0.374	0.0665																	0.271
BIOCARTA_BIOPEPTIDES_PATHWAY	45	35	0.0136	0.0234	2e-05	0.00322	0.308	0.228	0.203	0.267	1	0.052	1	0.0204	0.979			0.354	1	0.0847	1	0.0272	0.999			0.027	0.003
REACTOME_ACTIVATED_POINT_MUTANTS_OF_FGFR2	16	13	0.188	0.235	0.483	0.378	0.309	0.369	0.258																	0.499
REACTOME_TRANSPORT_OF_MATURE_MRNA_DERIVED_FROM_AN_INTRONLESS_TRANSCRIPT	33	26	0.0767	0.549	0.106	0.146	0.309	0.317	0.595
SIG_INSULIN_RECEPTOR_PATHWAY_IN_CARDIAC_MYOCYTES	51	42	0.0213	0.0288	0.132	0.0764	0.31	0.286	0.224	0.213	1	0.122	1					0.313	1	0.17	1					0.173	0.357
BIOCARTA_G1_PATHWAY	28	23	0.0789	0.0685	0.183	0.354	0.311	0.305	0.0521																	0.689
REACTOME_PHASE_II_CONJUGATION	70	58	0.0971	0.413	0.436	0.23	0.312	0.416	0.591																	0.934
KEGG_GRAFT_VERSUS_HOST_DISEASE	42	23	0.0255	0.655	0.00011	9e-05	0.313	0.388	0.798	0	0.137	0.0004	0.212	0.0032	0.625			0.0024	0.664	0.0043	0.802	0.0003	0.123			0.008	0.227
BIOCARTA_ETS_PATHWAY	18	13	0.354	0.702	0.414	0.274	0.313	0.308	0.788
REACTOME_TRANSPORT_OF_MATURE_TRANSCRIPT_TO_CYTOPLASM	54	38	0.0425	0.43	0.0728	0.0783	0.315	0.392	0.774																	0.849
REACTOME_PURINE_SALVAGE	13	10	0.353	0.161	0.2	0.169	0.315	0.352	0.113																	0.396
REACTOME_FGFR4_LIGAND_BINDING_AND_ACTIVATION	12	9	0.163	0.0962	0.233	0.159	0.315	0.382	0.209																	0.391
PID_NEPHRIN_NEPH1_PATHWAY	31	27	0.0371	0.0531	0.0129	0.0293	0.316	0.282	0.162	0.686	1	0.371	1					0.768	1	0.458	1					0.407
PID_PRLSIGNALINGEVENTSPATHWAY	23	17	0.323	0.355	0.646	0.564	0.317	0.389	0.474
BIOCARTA_NUCLEARRS_PATHWAY	15	12	0.138	0.393	0.158	0.293	0.318	0.298	0.317									0.319	1	0.167	1					0.471
KEGG_SMALL_CELL_LUNG_CANCER	84	69	0.0219	0.13	0.252	0.0354	0.32	0.196	0.146	0.794	1	0.723	1					0.824	1	0.706	1					0.451
BIOCARTA_IL4_PATHWAY	11	9	0.135	0.0871	0.0213	0.02	0.32	0.308	0.283	0.0804	1	0.0288	1					0.136	1	0.0582	1					0.072
BIOCARTA_PTDINS_PATHWAY	23	19	0.031	0.172	0.488	0.481	0.32	0.278	0.579									0.667	1							0.641
PID_THROMBIN_PAR4_PATHWAY	15	13	0.164	0.0322	0.0323	0.0219	0.32	0.324	0.278																	0.456
KEGG_PORPHYRIN_AND_CHLOROPHYLL_METABOLISM	41	29	0.0124	0.244	0.534	0.22	0.322	0.342	0.19	0.336	1							0.654	1							0.692
PID_IL6_7PATHWAY	47	32	0.0483	0.12	0.0276	0.00724	0.322	0.272	0.423	0.421	1	0.15	1					0.364	1	0.104	1					0.208	0.308
BIOCARTA_INSULIN_PATHWAY	22	14	0.156	0.139	0.0428	0.0842	0.323	0.316	0.14																	0.511
REACTOME_PEPTIDE_HORMONE_BIOSYNTHESIS	14	6	0.239	0.205	0.105	0.0621	0.323	0.407	0.357									0.0438	1	0.0171	0.995					0.255
PID_EPHRINBREVPATHWAY	30	25	0.0367	0.0556	0.0455	0.0212	0.326	0.238	0.248	0.637	1	0.284	1					0.226	1	0.122	1					0.349
REACTOME_TERMINATION_OF_O_GLYCAN_BIOSYNTHESIS	24	17	0.0403	0.0803	0.215	0.119	0.326	0.294	0.115	0.624	1	0.329	1					0.365	1	0.401	1					0.222
KEGG_NATURAL_KILLER_CELL_MEDIATED_CYTOTOXICITY	137	84	0.0545	0.0977	0.00533	0.0008	0.327	0.337	0.0772	0.153	1	0.331	1	0.282	1			0.209	1	0.254	1	0.0526	1	0.0701	0.992	0.05	0.176
PID_GLYPICAN_1PATHWAY	27	25	0.0324	0.00541	0.00313	0.0101	0.327	0.236	0.0418	0.699	1	0.343	1	0.116	1			0.5	1	0.148	1	0.12	1			0.36	0.221
PID_CIRCADIANPATHWAY	16	12	0.114	0.273	0.145	0.236	0.327	0.259	0.348	0.335	1							0.159	1
BIOCARTA_RAS_PATHWAY	23	17	0.0224	0.102	0.364	0.166	0.328	0.282	0.0635																	0.576
REACTOME_GENERATION_OF_SECOND_MESSENGER_MOLECULES	27	21	0.00291	0.0723	0.00125	0.00047	0.328	0.33	0.0772	0.122	1							0.0788	1	0.258	1	0.0313	0.999			0.296	0.197
SIG_REGULATION_OF_THE_ACTIN_CYTOSKELETON_BY_RHO_GTPASES	35	28	0.0734	0.439	0.544	0.323	0.329	0.332	0.558									0.649	1
REACTOME_GAP_JUNCTION_TRAFFICKING	27	15	0.184	0.119	0.251	0.0756	0.329	0.348	0.238																	0.536
PID_IL1PATHWAY	34	27	0.0478	0.371	0.22	0.117	0.33	0.309	0.665									0.739	1							0.756
REACTOME_HIV_LIFE_CYCLE	125	81	0.0019	0.0409	0.0811	0.00108	0.33	0.346	0.0338	0.876	1	0.608	1					0.312	1	0.269	1					0.928
REACTOME_PYRIMIDINE_METABOLISM	24	20	0.0953	0.0951	0.0308	0.219	0.334	0.296	0.16	0.429	1							0.252	1							0.285
REACTOME_DOWNREGULATION_OF_ERBB2_ERBB3_SIGNALING	12	9	0.136	0.154	0.203	0.272	0.338	0.292	0.131	0.316	1							0.325	1
REACTOME_TRANSCRIPTION_COUPLED_NER_TC_NER	45	32	0.0323	0.0073	0.0063	0.0194	0.341	0.309	0.019																	0.798
REACTOME_APOBEC3G_MEDIATED_RESISTANCE_TO_HIV1_INFECTION	12	4	0.184	0.148	0.314	0.151	0.341	0.401	0.358
REACTOME_NOD1_2_SIGNALING_PATHWAY	30	22	0.0163	0.00848	1e-05	1e-05	0.344	0.326	0.0206	0.321	1	0.137	1	0.0134	0.955	0.0014	0.276	0.482	1							0.305	0.021
REACTOME_CRMPS_IN_SEMA3A_SIGNALING	14	11	0.121	0.418	0.29	0.344	0.346	0.265	0.229
BIOCARTA_DEATH_PATHWAY	33	23	0.137	0.602	0.954	0.851	0.348	0.347	0.569																	0.318
ST_STAT3_PATHWAY	11	10	0.102	0.0336	0.00041	0.0068	0.349	0.362	0.331	0.102	1	0.0368	1					0.168	1	0.0729	1					0.102	0.116
REACTOME_MICRORNA_MIRNA_BIOGENESIS	23	12	0.239	0.627	0.546	0.466	0.351	0.31	0.584																	0.428
PID_LKB1_PATHWAY	47	36	0.00305	0.344	0.00634	0.174	0.353	0.335	0.877	0.3	1	0.225	1	0.0086	0.898			0.189	1	0.114	1	0.0142	0.976			0.085	0.006
ST_T_CELL_SIGNAL_TRANSDUCTION	45	38	0.0112	0.0191	0.0152	0.00064	0.355	0.325	0.234	0.0436	1	0.07	1					0.0949	1	0.124	1					0.12	0.338
REACTOME_TRANSPORT_TO_THE_GOLGI_AND_SUBSEQUENT_MODIFICATION	33	30	0.0301	0.0146	0.00048	0.014	0.355	0.297	0.00977	0.149	1	0.227	1	0.0654	1			0.0469	1	0.394	1	0.121	1			0.063	0.276
BIOCARTA_PTC1_PATHWAY	11	9	0.0738	0.121	0.374	0.156	0.356	0.366	0.264
PID_RXR_VDR_PATHWAY	26	22	0.0487	0.176	0.149	0.07	0.356	0.305	0.694	0.399	1	0.397	1					0.32	1	0.103	1	0.0949	1			0.096	0.192
PID_FOXM1PATHWAY	40	31	0.0409	0.245	0.558	0.331	0.356	0.387	0.403																	0.801
REACTOME_SYNTHESIS_SECRETION_AND_INACTIVATION_OF_GIP	14	9	0.201	0.253	0.312	0.337	0.357	0.442	0.469
REACTOME_PURINE_METABOLISM	33	27	0.394	0.315	0.41	0.559	0.357	0.421	0.23									0.62	1							0.763
KEGG_HEMATOPOIETIC_CELL_LINEAGE	88	56	0.0036	0.0158	0.00451	0.00967	0.359	0.355	0.255	0.0044	0.822	0.0404	1					0.0225	0.999	0.0269	0.999	0.235	1			0.148
PID_TRAIL_PATHWAY	28	21	0.219	0.611	0.938	0.763	0.359	0.356	0.453																	0.658
REACTOME_N_GLYCAN_ANTENNAE_ELONGATION	14	12	0.0999	0.138	0.0601	0.233	0.359	0.264	0.18	0.485	1							0.304	1							0.497
REACTOME_HIV_INFECTION	207	137	0.000285	0.00618	0.00853	9e-05	0.359	0.366	0.102	0.279	1	0.128	1					0.0447	1	0.105	1					0.376
REACTOME_SIGNALING_BY_NODAL	18	13	0.312	0.685	0.765	0.73	0.36	0.366	0.582
KEGG_ACUTE_MYELOID_LEUKEMIA	60	44	0.0464	0.278	0.183	0.174	0.362	0.3	0.395	0.422	1	0.303	1					0.515	1	0.378	1					0.174	0.357
BIOCARTA_BCELLSURVIVAL_PATHWAY	16	13	0.191	0.702	0.858	0.658	0.362	0.398	0.92
REACTOME_P38MAPK_EVENTS	13	10	0.104	0.568	0.761	0.443	0.363	0.389	0.79																	0.398
REACTOME_G2_M_CHECKPOINTS	45	36	0.198	0.398	0.377	0.449	0.363	0.433	0.137
REACTOME_ACTIVATED_AMPK_STIMULATES_FATTY_ACID_OXIDATION_IN_MUSCLE	19	14	0.00781	0.00392	0.0477	0.0322	0.365	0.384	0.0239	0.239	1							0.322	1							0.136	0.126
KEGG_PRIMARY_IMMUNODEFICIENCY	35	26	0.0535	0.0261	0.00136	0.00078	0.371	0.469	0.0114	0.0096	0.965							0.0742	1							0.734
REACTOME_GLYCOGEN_BREAKDOWN_GLYCOGENOLYSIS	18	13	0.103	0.629	0.261	0.0847	0.371	0.429	0.78																	0.525	0.109
BIOCARTA_AKT_PATHWAY	22	16	0.0485	0.195	0.582	0.237	0.372	0.34	0.121
BIOCARTA_RACCYCD_PATHWAY	26	17	0.166	0.137	0.135	0.152	0.376	0.341	0.043																	0.59
PID_IGF1_PATHWAY	30	27	0.0506	0.0281	0.0273	0.00379	0.376	0.333	0.193	0.199	1	0.044	1					0.275	1	0.0633	1					0.042	0.232
REACTOME_METABOLISM_OF_NUCLEOTIDES	72	59	0.196	0.355	0.119	0.45	0.376	0.423	0.227	0.671	1							0.495	1	0.777	1					0.542
REACTOME_PROTEIN_FOLDING	53	33	0.14	0.291	0.154	0.0649	0.377	0.42	0.221									0.809	1							0.811
REACTOME_ACTIVATION_OF_THE_AP1_FAMILY_OF_TRANSCRIPTION_FACTORS	10	6	0.189	0.766	0.625	0.591	0.377	0.344	0.842
KEGG_T_CELL_RECEPTOR_SIGNALING_PATHWAY	108	84	0.0101	0.0257	0.00201	2e-05	0.378	0.291	0.0657	0.131	1	0.385	1					0.0481	1	0.192	1	0.376	1	0.0508	0.987	0.232	0.573
REACTOME_CELL_CYCLE	421	272	0.00055	0.00563	0.0202	0.03	0.379	0.47	0.486	0.0378	1	0.0302	1	0.302	1			0.101	1	0.089	1	0.549	1			0.052	0.764
REACTOME_SIGNALLING_TO_P38_VIA_RIT_AND_RIN	15	12	0.165	0.392	0.152	0.153	0.379	0.336	0.406
PID_PLK1_PATHWAY	46	38	0.126	0.276	0.19	0.354	0.381	0.413	0.783																	0.557
REACTOME_EXTRINSIC_PATHWAY_FOR_APOPTOSIS	13	8	0.46	0.481	0.739	0.731	0.381	0.382	0.32
REACTOME_REGULATION_OF_KIT_SIGNALING	17	13	0.2	0.275	0.0697	0.0519	0.381	0.299	0.275									0.519	1	0.248	1					0.478
PID_ANGIOPOIETINRECEPTOR_PATHWAY	50	42	0.0173	0.21	0.0805	0.0277	0.382	0.351	0.804	0.853	1	0.567	1					0.943	1	0.735	1					0.598
BIOCARTA_CARM_ER_PATHWAY	35	26	0.191	0.254	0.537	0.613	0.383	0.301	0.3																	0.737
BIOCARTA_SKP2E2F_PATHWAY	10	8	0.187	0.502	0.0665	0.232	0.385	0.407	0.514																	0.34
REACTOME_ERKS_ARE_INACTIVATED	12	8	0.361	0.867	0.743	0.542	0.387	0.39	0.609																	0.318
REACTOME_GENERIC_TRANSCRIPTION_PATHWAY	352	266	0.000193	0.0222	0.0254	0.00526	0.387	0.513	0.257	0.0604	1	0.0218	0.999	0.172	1			0.0645	1	0.0124	0.985	0.198	1			0.027	0.117
ST_PHOSPHOINOSITIDE_3_KINASE_PATHWAY	37	32	0.034	0.0223	0.116	0.018	0.389	0.36	0.188	0.0404	1	0.0256	1					0.0721	1	0.045	1					0.087	0.262
REACTOME_ACTIVATED_NOTCH1_TRANSMITS_SIGNAL_TO_THE_NUCLEUS	27	16	0.386	0.588	0.383	0.421	0.389	0.359	0.489																	0.575
REACTOME_TCR_SIGNALING	54	40	0.00281	0.0313	0.00101	0.00073	0.39	0.368	0.0316	0.483	1							0.251	1	0.613	1	0.106	1			0.622	0.341
REACTOME_COMPLEMENT_CASCADE	32	23	0.0549	0.0987	0.321	0.161	0.392	0.401	0.474	0.0408	1							0.0848	1							0.026	0.203
REACTOME_VOLTAGE_GATED_POTASSIUM_CHANNELS	43	30	0.019	0.176	0.658	0.786	0.392	0.254	0.341	0.984	1	0.853	1					0.932	1	0.67	1					0.784
PID_VEGF_VEGFR_PATHWAY	10	9	0.169	0.136	0.545	0.431	0.393	0.399	0.253
REACTOME_ORGANIC_CATION_ANION_ZWITTERION_TRANSPORT	13	11	0.169	0.234	0.0325	0.0358	0.393	0.404	0.203	0.153	1	0.0564	1	0.0038	0.682											0.088	0.007
REACTOME_CYTOKINE_SIGNALING_IN_IMMUNE_SYSTEM	270	189	1.51e-05	0.00994	1e-05	1e-05	0.396	0.354	0.434	0.0266	0.999	0.011	0.967	0.0018	0.455	0.0002	0.128	0.0129	0.991	0.0029	0.686	0.0003	0.123	0.0021	0.393	0.03	0.005
KEGG_TRYPTOPHAN_METABOLISM	40	35	0.0972	0.277	0.311	0.218	0.398	0.438	0.288																	0.852
BIOCARTA_MAPK_PATHWAY	87	64	0.0264	0.319	0.422	0.422	0.399	0.335	0.613	0.973	1	0.802	1					0.873	1	0.734	1					0.819
SA_REG_CASCADE_OF_CYCLIN_EXPR	13	9	0.414	0.439	0.732	0.747	0.399	0.473	0.606
KEGG_ASCORBATE_AND_ALDARATE_METABOLISM	25	20	0.337	0.77	0.628	0.71	0.4	0.454	0.821
REACTOME_S_PHASE	109	75	0.0828	0.0901	0.14	0.222	0.402	0.512	0.195									0.951	1							0.884
REACTOME_ACYL_CHAIN_REMODELLING_OF_PI	15	14	0.163	0.488	0.681	0.696	0.403	0.463	0.628
PID_NFAT_TFPATHWAY	47	30	0.0961	0.111	0.00187	0.00988	0.404	0.431	0.366	0.0372	1	0.108	1	0.0036	0.667	0.0024	0.381	0.0287	1	0.006	0.884	0.0003	0.123	0.0003	0.0998	0.066	0.005
BIOCARTA_LEPTIN_PATHWAY	11	9	0.0298	0.0975	0.422	0.201	0.406	0.376	0.517	0.235	1							0.289	1							0.07	0.074
REACTOME_EICOSANOID_LIGAND_BINDING_RECEPTORS	16	8	0.124	0.041	0.0414	0.0421	0.407	0.434	0.159																	0.358	0.092
PID_AURORA_B_PATHWAY	39	29	0.123	0.377	0.444	0.462	0.408	0.44	0.493	0.358	1	0.151	1					0.634	1	0.405	1					0.177
KEGG_TYROSINE_METABOLISM	42	32	0.138	0.251	0.851	0.807	0.409	0.468	0.441	0.467	1							0.722	1							0.815
PID_NETRIN_PATHWAY	32	29	0.0258	0.0854	0.185	0.0669	0.409	0.194	0.159	0.96	1							0.875	1	0.908	1
PID_INTEGRIN_A4B1_PATHWAY	33	25	0.0712	0.144	0.418	0.274	0.41	0.361	0.552
REACTOME_REGULATION_OF_THE_FANCONI_ANEMIA_PATHWAY	11	5	0.0913	0.11	0.0518	0.223	0.411	0.378	0.106									0.036	1							0.217
REACTOME_NEF_MEDIATES_DOWN_MODULATION_OF_CELL_SURFACE_RECEPTORS_BY_RECRUITING_THEM_TO_CLATHRIN_ADAPTERS	21	16	0.152	0.296	0.43	0.0999	0.412	0.391	0.278	0.181	1	0.0668	1					0.0667	1	0.109	1					0.157
REACTOME_NUCLEOTIDE_EXCISION_REPAIR	51	36	0.0592	0.0158	0.0104	0.0418	0.412	0.384	0.0356																	0.838
BIOCARTA_TNFR1_PATHWAY	29	21	0.241	0.327	0.45	0.371	0.416	0.392	0.405
PID_ILK_PATHWAY	45	40	0.0455	0.121	0.236	0.132	0.417	0.373	0.761	0.511	1							0.266	1	0.613	1					0.57
REACTOME_VEGF_LIGAND_RECEPTOR_INTERACTIONS	10	9	0.175	0.0754	0.339	0.308	0.421	0.4	0.14
BIOCARTA_BARRESTIN_PATHWAY	10	8	0.0747	0.084	0.425	0.357	0.422	0.332	0.459									0.31	1							0.311
PID_P53REGULATIONPATHWAY	59	50	0.0285	0.00858	0.00755	0.0092	0.423	0.459	0.13	0.0728	1	0.0394	1					0.239	1	0.155	1					0.091	0.089
KEGG_METABOLISM_OF_XENOBIOTICS_BY_CYTOCHROME_P450	70	52	0.343	0.883	0.95	0.968	0.426	0.544	0.981
REACTOME_SYNTHESIS_OF_BILE_ACIDS_AND_BILE_SALTS_VIA_24_HYDROXYCHOLESTEROL	10	8	0.586	0.859	0.695	0.747	0.427	0.462	0.79
BIOCARTA_ARENRF2_PATHWAY	13	8	0.258	0.439	0.573	0.491	0.428	0.36	0.588
PID_FRA_PATHWAY	37	24	0.204	0.232	0.454	0.104	0.428	0.499	0.266									0.327	1	0.124	1	0.0053	0.775			0.724	0.215
PID_ERB_GENOMIC_PATHWAY	15	11	0.208	0.255	0.272	0.263	0.429	0.391	0.405																	0.458	0.1
REACTOME_ACTIVATION_OF_THE_MRNA_UPON_BINDING_OF_THE_CAP_BINDING_COMPLEX_AND_EIFS_AND_SUBSEQUENT_BINDING_TO_43S	84	28	0.187	0.499	0.198	0.264	0.43	0.608	0.82									0.538	1	0.313	1
REACTOME_ERK_MAPK_TARGETS	21	15	0.24	0.826	0.501	0.455	0.431	0.388	0.778																	0.558
PID_TRKRPATHWAY	62	53	0.0293	0.395	0.0319	0.0608	0.432	0.291	0.424	0.447	1	0.177	1					0.539	1	0.113	1					0.762	0.403
REACTOME_CITRIC_ACID_CYCLE_TCA_CYCLE	26	17	0.105	0.51	0.369	0.443	0.432	0.403	0.53
BIOCARTA_SET_PATHWAY	11	7	0.411	0.654	0.274	0.149	0.433	0.509	0.666																	0.278
REACTOME_UNFOLDED_PROTEIN_RESPONSE	80	53	0.278	0.574	0.568	0.512	0.433	0.544	0.559	0.359	1							0.373	1							0.736
REACTOME_RECYCLING_PATHWAY_OF_L1	27	23	0.0916	0.3	0.287	0.209	0.433	0.334	0.661
PID_ARF6_TRAFFICKINGPATHWAY	49	44	0.0309	0.187	0.115	0.174	0.434	0.354	0.597	0.962	1							0.892	1	0.82	1					0.88
PID_TCPTP_PATHWAY	43	38	0.0568	0.0458	0.00012	0.00255	0.434	0.421	0.258	0.236	1	0.05	1	0.0486	1	0.0042	0.493	0.392	1	0.0964	1	0.0927	1	0.0089	0.797	0.127	0.054
REACTOME_BASE_FREE_SUGAR_PHOSPHATE_REMOVAL_VIA_THE_SINGLE_NUCLEOTIDE_REPLACEMENT_PATHWAY	10	6	0.298	0.36	0.514	0.567	0.434	0.494	0.662
KEGG_TAURINE_AND_HYPOTAURINE_METABOLISM	10	10	0.176	0.274	0.242	0.107	0.435	0.527	0.111																	0.408	0.084
REACTOME_TRAF6_MEDIATED_INDUCTION_OF_TAK1_COMPLEX	14	11	0.136	0.0824	0.0468	0.0267	0.435	0.501	0.429
REACTOME_ASPARAGINE_N_LINKED_GLYCOSYLATION	81	59	0.00222	0.000283	0.00011	0.00114	0.437	0.417	0.0413	0.113	1	0.0914	1	0.0214	0.982			0.053	1	0.16	1	0.0037	0.673			0.082	0.02
KEGG_GLYCOSPHINGOLIPID_BIOSYNTHESIS_GLOBO_SERIES	14	10	0.118	0.281	0.267	0.233	0.439	0.445	0.479
SIG_BCR_SIGNALING_PATHWAY	46	40	0.0165	0.00239	0.0276	0.00223	0.439	0.327	0.107	0.293	1	0.29	1	0.179	1			0.312	1	0.315	1	0.204	1	0.0262	0.958	0.147	0.057
PID_INSULIN_PATHWAY	45	38	0.0324	0.178	0.0847	0.0446	0.439	0.346	0.462	0.568	1	0.205	1					0.68	1	0.278	1					0.049
PID_INTEGRIN2_PATHWAY	29	21	0.223	0.809	0.682	0.625	0.439	0.502	0.864
REACTOME_G2_M_DNA_DAMAGE_CHECKPOINT	12	8	0.208	0.551	0.592	0.433	0.44	0.427	0.458
KEGG_AXON_GUIDANCE	129	106	0.00265	0.0778	0.102	0.0147	0.441	0.132	0.407	0.477	1	0.65	1	0.669	1			0.486	1	0.557	1	0.631	1			0.288	0.306
REACTOME_SYNTHESIS_OF_PIPS_AT_THE_LATE_ENDOSOME_MEMBRANE	10	10	0.28	0.74	0.907	0.659	0.441	0.417	0.906
BIOCARTA_TOB1_PATHWAY	21	17	0.0861	0.491	0.177	0.278	0.443	0.307	0.7	0.0184	0.998	0.56	1					0.0711	1	0.635	1					0.232
REACTOME_SIGNALLING_TO_RAS	27	21	0.109	0.39	0.182	0.182	0.444	0.413	0.508	0.324	1							0.454	1							0.281
KEGG_PENTOSE_PHOSPHATE_PATHWAY	27	19	0.35	0.141	0.0215	0.0449	0.446	0.455	0.134									0.0487	1	0.179	1					0.614	0.147
REACTOME_METABOLISM_OF_NON_CODING_RNA	49	36	0.0617	0.329	0.0562	0.0933	0.446	0.49	0.639																	0.85	0.31
REACTOME_PLATELET_HOMEOSTASIS	78	62	0.00862	0.0799	0.342	0.178	0.446	0.273	0.337	0.9	1	0.816	1					0.743	1	0.72	1					0.6
BIOCARTA_SRCRPTP_PATHWAY	11	11	0.219	0.159	0.195	0.278	0.448	0.373	0.313																	0.431
PID_NFAT_3PATHWAY	54	44	0.0398	0.0496	0.0949	0.107	0.448	0.3	0.275	0.819	1	0.652	1	0.226	1			0.529	1	0.492	1	0.261	1			0.384	0.063
REACTOME_AMINE_DERIVED_HORMONES	15	10	0.217	0.0958	0.223	0.511	0.448	0.44	0.175
BIOCARTA_IGF1_PATHWAY	21	15	0.227	0.143	0.0449	0.0861	0.45	0.421	0.131																	0.544
REACTOME_CLASS_A1_RHODOPSIN_LIKE_RECEPTORS	305	172	0.00763	0.00426	0.00253	0.0114	0.45	0.66	0.143	0.241	1	0.121	1	0.377	1			0.626	1	0.537	1	0.373	1			0.368	0.528
REACTOME_PROTEOLYTIC_CLEAVAGE_OF_SNARE_COMPLEX_PROTEINS	17	11	0.327	0.649	0.123	0.0239	0.451	0.434	0.619																	0.459
REACTOME_PI3K_EVENTS_IN_ERBB2_SIGNALING	44	37	0.0109	0.0157	0.0254	0.014	0.451	0.349	0.209	0.146	1	0.218	1					0.202	1	0.257	1					0.567
BIOCARTA_PML_PATHWAY	17	10	0.218	0.153	0.326	0.153	0.452	0.448	0.183																	0.377
PID_FAK_PATHWAY	59	53	0.0215	0.187	0.12	0.0592	0.453	0.281	0.397	0.907	1	0.533	1					0.823	1	0.372	1					0.74
SA_PTEN_PATHWAY	17	15	0.258	0.373	0.323	0.152	0.455	0.426	0.336	0.289	1							0.339	1							0.527
PID_P38_MKK3_6PATHWAY	26	20	0.105	0.188	0.194	0.0835	0.456	0.402	0.579
REACTOME_SIGNALING_BY_ERBB4	90	69	0.00252	0.0591	0.0365	0.0104	0.456	0.289	0.42	0.651	1	0.55	1					0.766	1	0.663	1					0.871
REACTOME_GLOBAL_GENOMIC_NER_GG_NER	35	28	0.0848	0.0543	0.0463	0.122	0.457	0.447	0.11
KEGG_WNT_SIGNALING_PATHWAY	151	114	0.0598	0.306	0.162	0.0784	0.46	0.395	0.376	0.343	1	0.103	1	0.0644	1	0.0534	0.939	0.274	1	0.167	1	0.143	1	0.114	0.997	0.026	0.031
ST_GRANULE_CELL_SURVIVAL_PATHWAY	27	18	0.0523	0.0586	0.0684	0.0708	0.46	0.382	0.728	0.345	1	0.117	1	0.0436	1			0.457	1	0.183	1	0.0664	1			0.22	0.144
KEGG_MTOR_SIGNALING_PATHWAY	52	42	0.02	0.426	0.712	0.212	0.461	0.465	0.881	0.33	1	0.554	1					0.415	1	0.609	1					0.339	0.347
REACTOME_NEURONAL_SYSTEM	279	222	4.6e-06	0.00985	0.00736	0.00607	0.461	0.176	0.338	0.926	1	0.895	1	0.448	1			0.886	1	0.78	1	0.516	1			0.31	0.153
KEGG_GLYCEROLIPID_METABOLISM	49	37	0.0464	0.124	0.361	0.165	0.462	0.412	0.447	0.062	1	0.69	1					0.0476	1	0.286	1					0.278
REACTOME_CHOLESTEROL_BIOSYNTHESIS	24	17	0.196	0.462	0.271	0.381	0.462	0.556	0.248																	0.605	0.161
PID_P73PATHWAY	79	65	0.0729	0.145	0.166	0.177	0.463	0.413	0.36	0.985	1	0.877	1					0.978	1	0.958	1
REACTOME_BIOSYNTHESIS_OF_THE_N_GLYCAN_PRECURSOR_DOLICHOL_LIPID_LINKED_OLIGOSACCHARIDE_LLO_AND_TRANSFER_TO_A_NASCENT_PROTEIN	29	15	0.0634	0.0375	0.0262	0.0408	0.463	0.491	0.46									0.276	1	0.144	1	0.0117	0.953			0.518	0.136
REACTOME_MITOCHONDRIAL_PROTEIN_IMPORT	58	29	0.0892	0.0533	0.142	0.0917	0.464	0.627	0.233	0.163	1							0.22	1							0.429
KEGG_FRUCTOSE_AND_MANNOSE_METABOLISM	34	23	0.0946	0.192	0.243	0.3	0.466	0.446	0.373									0.798	1
BIOCARTA_ACE2_PATHWAY	13	12	0.0738	0.26	0.141	0.0158	0.466	0.413	0.305																	0.445
BIOCARTA_INFLAM_PATHWAY	29	15	0.0273	0.0753	0.00105	0.00058	0.466	0.547	0.277	0.0816	1	0.0296	1	0.0016	0.419			0.105	1	0.0232	0.999	0.0009	0.272	0.0016	0.333	0.182	0.135
PID_P38ALPHABETADOWNSTREAMPATHWAY	38	30	0.0737	0.824	0.94	0.95	0.466	0.437	0.994
REACTOME_NUCLEOTIDE_BINDING_DOMAIN_LEUCINE_RICH_REPEAT_CONTAINING_RECEPTOR_NLR_SIGNALING_PATHWAYS	46	34	0.0271	0.0259	1e-05	1e-05	0.466	0.433	0.0332	0.382	1	0.129	1	0.0052	0.777	0	0.083	0.566	1	0.559	1	0.0924	1	0.0069	0.728	0.247	0.005
KEGG_GLYCOSPHINGOLIPID_BIOSYNTHESIS_LACTO_AND_NEOLACTO_SERIES	26	16	0.349	0.925	0.699	0.91	0.467	0.453	0.951																	0.564
REACTOME_CYCLIN_E_ASSOCIATED_EVENTS_DURING_G1_S_TRANSITION_	65	39	0.149	0.277	0.599	0.561	0.467	0.546	0.664									0.713	1							0.606
KEGG_RIG_I_LIKE_RECEPTOR_SIGNALING_PATHWAY	71	35	0.0687	0.117	0.00107	0.014	0.468	0.53	0.338	0.224	1	0.055	1	0.0232	0.986			0.294	1	0.243	1	0.0837	1	0.0074	0.745	0.264	0.009
REACTOME_FATTY_ACYL_COA_BIOSYNTHESIS	18	14	0.0982	0.262	0.22	0.154	0.468	0.37	0.593	0.451	1							0.48	1							0.157	0.15
BIOCARTA_AKAP13_PATHWAY	12	8	0.0415	0.796	0.516	0.361	0.469	0.376	0.889
REACTOME_PROLACTIN_RECEPTOR_SIGNALING	14	9	0.0879	0.282	0.345	0.182	0.469	0.429	0.73
PID_PI3KPLCTRKPATHWAY	36	31	0.0551	0.0261	0.145	0.0867	0.47	0.476	0.25	0.504	1	0.249	1					0.634	1	0.355	1					0.462	0.27
BIOCARTA_IGF1MTOR_PATHWAY	20	16	0.182	0.411	0.476	0.277	0.471	0.471	0.794																	0.57
REACTOME_PYRIMIDINE_CATABOLISM	12	10	0.199	0.292	0.0554	0.495	0.471	0.445	0.476
PID_S1P_S1P1_PATHWAY	21	17	0.0706	0.0774	0.149	0.0821	0.472	0.489	0.165
REACTOME_SYNTHESIS_OF_DNA	92	64	0.154	0.0994	0.103	0.216	0.472	0.586	0.266									0.903	1							0.847
REACTOME_CREB_PHOSPHORYLATION_THROUGH_THE_ACTIVATION_OF_RAS	27	22	0.0381	0.0147	0.0116	0.00601	0.472	0.349	0.172	0.445	1							0.255	1	0.687	1					0.672
BIOCARTA_CTL_PATHWAY	15	12	0.0844	0.204	0.173	0.158	0.473	0.428	0.349	0.015	0.995							0.0215	0.999							0.46
BIOCARTA_PTEN_PATHWAY	18	14	0.226	0.0862	0.149	0.0258	0.473	0.478	0.282																	0.517
PID_IL8CXCR1_PATHWAY	28	24	0.0214	0.00748	0.112	0.104	0.473	0.332	0.249									0.946	1							0.332
KEGG_GLYCOSAMINOGLYCAN_BIOSYNTHESIS_HEPARAN_SULFATE	26	22	0.249	0.887	0.899	0.844	0.475	0.39	0.729
REACTOME_PI_METABOLISM	48	44	0.0221	0.156	0.108	0.00899	0.475	0.407	0.827	0.161	1	0.702	1					0.0247	1	0.129	1	0.172	1			0.176
KEGG_NOD_LIKE_RECEPTOR_SIGNALING_PATHWAY	62	42	0.216	0.539	5e-05	0.00017	0.477	0.542	0.516									0.637	1							0.867	0.348
REACTOME_CELL_CYCLE_MITOTIC	325	232	0.000659	0.000713	0.00075	0.00159	0.477	0.575	0.374	0.0118	0.986	0.0152	0.989	0.203	1			0.0286	1	0.0445	1	0.345	1			0.011	0.679
REACTOME_IKK_COMPLEX_RECRUITMENT_MEDIATED_BY_RIP1	10	8	0.297	0.351	0.557	0.511	0.477	0.537	0.118
BIOCARTA_VITCB_PATHWAY	11	10	0.296	0.574	0.215	0.0368	0.478	0.392	0.223																	0.384
REACTOME_REGULATION_OF_COMPLEMENT_CASCADE	14	11	0.262	0.294	0.39	0.233	0.478	0.475	0.648	0.0876	1							0.114	1							0.103
REACTOME_REGULATION_OF_PYRUVATE_DEHYDROGENASE_PDH_COMPLEX	13	11	0.159	0.0655	0.163	0.166	0.479	0.578	0.0797
REACTOME_MYOGENESIS	28	21	0.075	0.262	0.241	0.19	0.479	0.328	0.461	0.594	1							0.603	1	0.571	1					0.647
PID_RET_PATHWAY	39	31	0.0589	0.254	0.237	0.265	0.48	0.383	0.61	0.719	1	0.655	1					0.797	1	0.722	1					0.464
REACTOME_POST_NMDA_RECEPTOR_ACTIVATION_EVENTS	33	28	0.0173	0.0205	0.014	0.0149	0.48	0.329	0.238	0.696	1							0.496	1	0.811	1					0.765
REACTOME_PURINE_CATABOLISM	10	8	0.39	0.779	0.85	0.833	0.48	0.48	0.827
REACTOME_SIGNALLING_BY_NGF	217	171	5.56e-05	0.0362	0.00029	5e-05	0.481	0.288	0.469	0.261	1	0.131	1	0.389	1			0.383	1	0.27	1	0.485	1			0.348	0.506
REACTOME_ADAPTIVE_IMMUNE_SYSTEM	539	386	1.35e-06	0.00314	0.00137	2e-05	0.481	0.488	0.715	0.0042	0.813	0.0036	0.717	0.0188	0.976	0.258	0.99	0.0037	0.789	0.0028	0.665	0.0058	0.813	0.534	1	0.005	0.033
BIOCARTA_TPO_PATHWAY	24	18	0.0908	0.0171	0.00645	0.0445	0.482	0.41	0.0932	0.244	1	0.0704	1					0.311	1	0.11	1					0.07	0.149
REACTOME_ANTIGEN_PROCESSING_CROSS_PRESENTATION	76	48	0.0709	0.169	0.0622	0.0754	0.482	0.563	0.861	0.0216	0.998	0.0592	1					0.0403	1	0.0495	1	0.0288	0.999			0.095
REACTOME_MEIOSIS	116	48	0.498	0.888	0.995	0.992	0.483	0.465	0.971
REACTOME_POST_TRANSLATIONAL_MODIFICATION_SYNTHESIS_OF_GPI_ANCHORED_PROTEINS	26	21	0.418	0.592	0.273	0.534	0.483	0.529	0.45																	0.636
REACTOME_TRANSPORT_OF_INORGANIC_CATIONS_ANIONS_AND_AMINO_ACIDS_OLIGOPEPTIDES	94	79	0.0193	0.118	0.0431	0.112	0.483	0.426	0.591	0.593	1	0.436	1					0.796	1	0.66	1					0.778
KEGG_PANTOTHENATE_AND_COA_BIOSYNTHESIS	16	13	0.114	0.182	0.087	0.152	0.485	0.46	0.723									0.433	1							0.527
BIOCARTA_CASPASE_PATHWAY	23	18	0.367	0.503	0.587	0.523	0.485	0.536	0.499																	0.607
BIOCARTA_CACAM_PATHWAY	16	12	0.147	0.283	0.0354	0.102	0.486	0.487	0.599	0.239	1	0.104	1					0.343	1	0.16	1					0.116	0.12
PID_AVB3_INTEGRIN_PATHWAY	75	67	0.0267	0.0149	0.0371	0.00361	0.486	0.382	0.0984	0.176	1	0.171	1					0.235	1	0.217	1					0.133
REACTOME_PROSTANOID_LIGAND_RECEPTORS	10	4	0.191	0.0927	0.0648	0.0677	0.486	0.473	0.189																	0.197	0.039
REACTOME_CYTOSOLIC_TRNA_AMINOACYLATION	24	20	0.282	0.233	0.197	0.0983	0.488	0.479	0.24									0.402	1	0.197	1					0.651
REACTOME_FORMATION_OF_RNA_POL_II_ELONGATION_COMPLEX_	45	28	0.206	0.435	0.148	0.128	0.489	0.482	0.228									0.558	1							0.762
KEGG_SELENOAMINO_ACID_METABOLISM	26	21	0.196	0.219	0.442	0.321	0.49	0.565	0.485																	0.276
KEGG_MISMATCH_REPAIR	23	20	0.259	0.194	0.139	0.163	0.49	0.534	0.406
PID_SYNDECAN_4_PATHWAY	32	27	0.0849	0.258	0.396	0.139	0.492	0.472	0.685									0.678	1
PID_IL12_2PATHWAY	63	45	0.0244	0.214	0.00149	0.00014	0.493	0.506	0.694	0.011	0.977	0.0154	0.99	0.0002	0.136	0.0038	0.468	0.0138	0.992	0.0331	1	0.0011	0.316	0.002	0.378	0.026	0.011
REACTOME_THE_NLRP3_INFLAMMASOME	12	8	0.344	0.285	0.00167	0.013	0.494	0.519	0.274																	0.354	0.085
ST_INTERFERON_GAMMA_PATHWAY	10	10	0.55	0.285	0.53	0.317	0.495	0.533	0.273																	0.394	0.097
BIOCARTA_PAR1_PATHWAY	37	31	0.0606	0.243	0.467	0.229	0.496	0.368	0.675	0.839	1							0.687	1							0.476
BIOCARTA_EPO_PATHWAY	19	11	0.0515	0.01	0.00937	0.00934	0.499	0.5	0.187																	0.433
PID_ECADHERIN_NASCENTAJ_PATHWAY	39	35	0.258	0.743	0.82	0.48	0.499	0.435	0.826	0.823	1	0.532	1					0.86	1	0.599	1					0.846
REACTOME_SYNTHESIS_OF_PIPS_AT_THE_PLASMA_MEMBRANE	31	28	0.0571	0.0392	0.0504	0.00346	0.5	0.425	0.254	0.0852	1	0.504	1					0.0577	1	0.095	1	0.0837	1			0.045
REACTOME_PASSIVE_TRANSPORT_BY_AQUAPORINS	11	8	0.583	0.578	0.676	0.646	0.501	0.608	0.484
BIOCARTA_LYM_PATHWAY	11	10	0.182	0.15	0.00856	0.0872	0.504	0.564	0.586	0.0646	1							0.0197	0.999	0.0549	1					0.389
REACTOME_PEROXISOMAL_LIPID_METABOLISM	21	19	0.48	0.564	0.347	0.728	0.505	0.554	0.304
REACTOME_PI3K_EVENTS_IN_ERBB4_SIGNALING	38	31	0.0224	0.104	0.0719	0.0211	0.507	0.405	0.522	0.178	1	0.366	1					0.245	1	0.407	1					0.803
REACTOME_PEPTIDE_LIGAND_BINDING_RECEPTORS	188	101	0.0281	0.00967	0.00102	0.00477	0.508	0.7	0.246	0.426	1	0.222	1					0.664	1	0.662	1	0.56	1			0.749	0.625
REACTOME_MITOTIC_G1_G1_S_PHASES	137	92	0.0556	0.07	0.209	0.386	0.508	0.611	0.39	0.868	1	0.585	1					0.842	1	0.867	1					0.693
REACTOME_ACTIVATED_TAK1_MEDIATES_P38_MAPK_ACTIVATION	18	14	0.053	0.0101	1e-05	1e-05	0.509	0.492	0.502									0.304	1							0.524	0.121
REACTOME_SHC_MEDIATED_SIGNALLING	15	11	0.231	0.241	0.0828	0.0883	0.509	0.466	0.295																	0.416
REACTOME_METABOLISM_OF_RNA	330	156	0.028	0.68	0.506	0.4	0.51	0.722	0.996	0.969	1	0.792	1					0.813	1	0.899	1					0.961	0.804
BIOCARTA_G2_PATHWAY	24	21	0.185	0.262	0.101	0.122	0.511	0.521	0.67																	0.648
BIOCARTA_EPONFKB_PATHWAY	11	7	0.18	0.285	0.594	0.449	0.511	0.545	0.555
ST_PAC1_RECEPTOR_PATHWAY	7	4	0.0464	0.00178	0.00717	0.00532	0.511	0.464	0.657	0.0592	1	0.0218	0.999					0.0685	1	0.0304	1					0.018	0.04
REACTOME_CLASS_C_3_METABOTROPIC_GLUTAMATE_PHEROMONE_RECEPTORS	15	12	0.0775	0.809	0.732	0.734	0.511	0.302	0.913	0.913	1							0.916	1
REACTOME_REGULATION_OF_INSULIN_LIKE_GROWTH_FACTOR_IGF_ACTIVITY_BY_INSULIN_LIKE_GROWTH_FACTOR_BINDING_PROTEINS_IGFBPS	16	12	0.193	0.288	0.726	0.672	0.512	0.532	0.64
KEGG_STEROID_HORMONE_BIOSYNTHESIS	55	43	0.434	0.883	0.421	0.758	0.513	0.581	0.955																	0.846
BIOCARTA_ACH_PATHWAY	16	15	0.223	0.363	0.589	0.228	0.513	0.555	0.64
ST_P38_MAPK_PATHWAY	37	28	0.0876	0.437	0.323	0.339	0.513	0.471	0.889									0.795	1
REACTOME_IL_3_5_AND_GM_CSF_SIGNALING	43	31	0.0424	0.0448	0.00427	0.00288	0.513	0.429	0.314	0.314	1	0.504	1					0.0977	1	0.119	1					0.45
PID_CONE_PATHWAY	23	18	0.325	0.383	0.622	0.788	0.514	0.538	0.572
KEGG_AMYOTROPHIC_LATERAL_SCLEROSIS_ALS	53	37	0.0582	0.179	0.0558	0.0742	0.516	0.438	0.559	0.96	1							0.82	1	0.896	1
PID_LYMPHANGIOGENESIS_PATHWAY	25	22	0.0851	0.146	0.0652	0.0538	0.517	0.493	0.605	0.2	1	0.216	1					0.263	1	0.0856	1					0.323
REACTOME_ANTIGEN_ACTIVATES_B_CELL_RECEPTOR_LEADING_TO_GENERATION_OF_SECOND_MESSENGERS	29	25	0.0586	0.171	0.0763	0.0595	0.517	0.416	0.428	0.618	1	0.556	1					0.662	1	0.595	1					0.364
REACTOME_IONOTROPIC_ACTIVITY_OF_KAINATE_RECEPTORS	11	11	0.0804	0.166	0.0629	0.0582	0.517	0.387	0.409	0.751	1							0.729	1
BIOCARTA_HIF_PATHWAY	15	11	0.0969	0.425	0.722	0.46	0.519	0.546	0.7
PID_ERBB1_DOWNSTREAM_PATHWAY	105	87	0.00331	0.0782	0.123	0.125	0.519	0.457	0.756	0.698	1	0.773	1	0.289	1			0.247	1	0.704	1	0.141	1			0.447	0.22
KEGG_B_CELL_RECEPTOR_SIGNALING_PATHWAY	75	55	0.136	0.182	0.0278	0.00355	0.52	0.411	0.0752	0.148	1	0.0862	1					0.256	1	0.155	1					0.064	0.392
REACTOME_COMMON_PATHWAY	14	9	0.229	0.788	0.69	0.495	0.52	0.497	0.83																	0.347
REACTOME_SYNTHESIS_SECRETION_AND_DEACYLATION_OF_GHRELIN	16	10	0.385	0.388	0.579	0.469	0.52	0.627	0.506
REACTOME_PRESYNAPTIC_NICOTINIC_ACETYLCHOLINE_RECEPTORS	12	8	0.552	0.803	0.782	0.81	0.521	0.594	0.663
REACTOME_SCFSKP2_MEDIATED_DEGRADATION_OF_P27_P21	56	34	0.144	0.306	0.487	0.516	0.521	0.63	0.83									0.608	1							0.486
PID_VEGFR1_2_PATHWAY	69	60	0.0201	0.0232	0.0184	0.00466	0.522	0.403	0.17	0.719	1	0.453	1	0.227	1			0.795	1	0.554	1	0.298	1			0.178	0.147
BIOCARTA_EXTRINSIC_PATHWAY	13	10	0.274	0.576	0.363	0.333	0.523	0.571	0.569																	0.39
REACTOME_CD28_CO_STIMULATION	32	28	0.154	0.357	0.0578	0.0157	0.525	0.463	0.66	0.354	1	0.349	1					0.0706	1	0.0377	1					0.41
PID_HIF1_TFPATHWAY	66	52	0.0192	0.00551	0.00355	0.00065	0.526	0.52	0.155	0.054	1	0.0576	1	0.0236	0.987			0.0947	1	0.169	1	0.0742	1			0.118	0.015
BIOCARTA_CERAMIDE_PATHWAY	22	13	0.121	0.549	0.887	0.631	0.527	0.438	0.788
REACTOME_KERATAN_SULFATE_DEGRADATION	11	10	0.362	0.377	0.523	0.739	0.527	0.598	0.64
REACTOME_METABOLISM_OF_STEROID_HORMONES_AND_VITAMINS_A_AND_D	35	27	0.395	0.117	0.043	0.119	0.528	0.608	0.415	0.228	1	0.0672	1					0.524	1	0.224	1					0.412
REACTOME_UNWINDING_OF_DNA	11	8	0.351	0.317	0.42	0.519	0.529	0.59	0.25
REACTOME_INCRETIN_SYNTHESIS_SECRETION_AND_INACTIVATION	22	14	0.376	0.44	0.448	0.499	0.531	0.642	0.662
BIOCARTA_BLYMPHOCYTE_PATHWAY	11	8	0.16	0.433	0.11	0.0575	0.533	0.547	0.513																	0.337
REACTOME_ASSOCIATION_OF_LICENSING_FACTORS_WITH_THE_PRE_REPLICATIVE_COMPLEX	14	9	0.609	0.517	0.714	0.469	0.533	0.627	0.0394
REACTOME_FANCONI_ANEMIA_PATHWAY	25	14	0.128	0.348	0.0779	0.13	0.533	0.51	0.574	0.152	1							0.0819	1	0.111	1	0.0115	0.95			0.141	0.113
BIOCARTA_MYOSIN_PATHWAY	31	26	0.0809	0.216	0.486	0.329	0.534	0.416	0.605	0.77	1							0.794	1							0.386
REACTOME_AXON_GUIDANCE	251	212	5.28e-05	0.0668	0.149	0.0829	0.535	0.169	0.428	0.999	1	0.992	1					0.998	1	0.993	1	0.984	1			0.917
BIOCARTA_ECM_PATHWAY	24	18	0.0956	0.111	0.162	0.0854	0.537	0.486	0.441																	0.619
REACTOME_RNA_POL_II_TRANSCRIPTION	105	66	0.16	0.563	0.219	0.0274	0.537	0.632	0.618	0.636	1	0.351	1					0.274	1	0.16	1					0.642
REACTOME_DARPP_32_EVENTS	25	18	0.153	0.591	0.152	0.175	0.537	0.436	0.476									0.82	1							0.614
BIOCARTA_KREB_PATHWAY	8	6	0.273	0.412	0.52	0.503	0.538	0.521	0.644
REACTOME_GPCR_LIGAND_BINDING	408	240	0.00386	0.00856	0.05	0.0766	0.538	0.713	0.334	0.358	1	0.353	1	0.406	1			0.715	1	0.804	1	0.465	1			0.417	0.429
REACTOME_MRNA_DECAY_BY_5_TO_3_EXORIBONUCLEASE	15	11	0.316	0.635	0.822	0.649	0.539	0.595	0.938
BIOCARTA_TCR_PATHWAY	49	34	0.116	0.139	0.061	0.0377	0.541	0.398	0.254	0.252	1	0.578	1					0.38	1	0.617	1					0.242	0.311
BIOCARTA_VEGF_PATHWAY	29	21	0.487	0.21	0.541	0.509	0.542	0.539	0.324
PID_SYNDECAN_3_PATHWAY	17	13	0.358	0.119	0.0339	0.105	0.542	0.526	0.198	0.301	1	0.125	1					0.399	1	0.189	1					0.498
REACTOME_CTNNB1_PHOSPHORYLATION_CASCADE	16	11	0.543	0.894	0.859	0.844	0.542	0.525	0.486																	0.423
PID_P53DOWNSTREAMPATHWAY	137	98	0.055	0.123	0.262	0.104	0.543	0.589	0.365	0.0706	1	0.0794	1					0.258	1	0.207	1					0.023
REACTOME_STRIATED_MUSCLE_CONTRACTION	27	19	0.126	0.0823	0.109	0.146	0.543	0.543	0.363	0.0438	1							0.0426	1	0.421	1					0.639	0.176
PID_IL8CXCR2_PATHWAY	34	29	0.0374	0.0225	0.0444	0.0196	0.544	0.422	0.28	0.87	1	0.542	1					0.506	1	0.584	1					0.165
BIOCARTA_UCALPAIN_PATHWAY	18	14	0.222	0.0595	0.106	0.0511	0.547	0.533	0.198
REACTOME_CYCLIN_A_B1_ASSOCIATED_EVENTS_DURING_G2_M_TRANSITION	15	12	0.156	0.332	0.436	0.19	0.547	0.6	0.652
REACTOME_E2F_MEDIATED_REGULATION_OF_DNA_REPLICATION	35	24	0.386	0.271	0.13	0.202	0.548	0.618	0.0498									0.401	1							0.346
KEGG_PROXIMAL_TUBULE_BICARBONATE_RECLAMATION	23	16	0.749	0.812	0.855	0.471	0.549	0.587	0.502
PID_AR_TF_PATHWAY	53	41	0.0318	0.296	0.422	0.161	0.55	0.543	0.606	0.461	1	0.164	1	0.0532	1			0.754	1	0.409	1	0.136	1			0.348	0.062
REACTOME_EARLY_PHASE_OF_HIV_LIFE_CYCLE	21	8	0.0399	0.0808	0.267	0.0662	0.55	0.543	0.0242
REACTOME_STEROID_HORMONES	29	25	0.405	0.126	0.0402	0.118	0.551	0.641	0.381	0.194	1	0.0546	1					0.434	1	0.16	1					0.379
BIOCARTA_GATA3_PATHWAY	16	11	0.133	0.719	0.422	0.0733	0.553	0.538	0.839																	0.423	0.102
PID_NECTIN_PATHWAY	30	29	0.127	0.743	0.58	0.383	0.553	0.448	0.839																	0.797
REACTOME_CLASS_I_MHC_MEDIATED_ANTIGEN_PROCESSING_PRESENTATION	251	178	0.00228	0.188	0.114	0.0686	0.553	0.594	0.947	0.0116	0.985	0.004	0.75	0.0194	0.978			0.016	0.996	0.0102	0.97	0.0041	0.704	0.18	0.999	0.039	0.033
BIOCARTA_IL22BP_PATHWAY	16	14	0.228	0.119	0.00312	0.0425	0.555	0.588	0.392																	0.531	0.127
REACTOME_CREB_PHOSPHORYLATION_THROUGH_THE_ACTIVATION_OF_CAMKII	15	13	0.106	0.0141	0.0114	0.0109	0.555	0.467	0.112	0.295	1							0.14	1	0.421	1					0.493
REACTOME_SOS_MEDIATED_SIGNALLING	14	11	0.259	0.261	0.0652	0.0756	0.555	0.511	0.325																	0.465
REACTOME_N_GLYCAN_TRIMMING_IN_THE_ER_AND_CALNEXIN_CALRETICULIN_CYCLE	13	9	0.0847	0.0261	0.0753	0.0291	0.558	0.592	0.358																	0.338	0.067
REACTOME_IL_RECEPTOR_SHC_SIGNALING	27	15	0.196	0.169	0.0172	0.0164	0.559	0.519	0.342	0.304	1	0.136	1					0.165	1	0.0456	1					0.166
BIOCARTA_D4GDI_PATHWAY	13	9	0.535	0.666	0.643	0.694	0.56	0.553	0.812
REACTOME_IL_6_SIGNALING	11	9	0.123	0.0162	0.0005	0.00725	0.561	0.548	0.239	0.0902	1	0.0336	1					0.134	1	0.0473	1					0.062	0.079
PID_NCADHERINPATHWAY	33	31	0.115	0.266	0.174	0.0737	0.562	0.586	0.551	0.0896	1	0.269	1					0.0662	1	0.0501	1	0.0752	1			0.068	0.275
ST_INTERLEUKIN_4_PATHWAY	26	23	0.375	0.159	0.178	0.0624	0.564	0.543	0.445	0.116	1	0.027	1					0.22	1	0.0736	1					0.132
REACTOME_OTHER_SEMAPHORIN_INTERACTIONS	15	13	0.0632	0.626	0.531	0.763	0.565	0.405	0.903	0.877	1							0.899	1
REACTOME_ETHANOL_OXIDATION	10	9	0.303	0.255	0.508	0.595	0.565	0.569	0.433
PID_CASPASE_PATHWAY	52	37	0.172	0.154	0.0195	0.0392	0.566	0.553	0.232	0.487	1	0.184	1					0.69	1	0.35	1					0.28	0.296
KEGG_O_GLYCAN_BIOSYNTHESIS	30	26	0.1	0.215	0.142	0.158	0.567	0.414	0.299	0.975	1							0.975	1							0.731
REACTOME_PURINE_RIBONUCLEOSIDE_MONOPHOSPHATE_BIOSYNTHESIS	11	10	0.681	0.414	0.427	0.594	0.567	0.646	0.334
PID_INTEGRIN_A9B1_PATHWAY	25	19	0.271	0.348	0.331	0.445	0.568	0.504	0.597									0.546	1	0.527	1
KEGG_RNA_DEGRADATION	59	46	0.0502	0.395	0.46	0.333	0.569	0.631	0.817
KEGG_CELL_CYCLE	128	94	0.102	0.228	0.0213	0.0563	0.569	0.665	0.492	0.213	1	0.202	1	0.121	1			0.573	1	0.504	1	0.313	1			0.537	0.607
KEGG_AMINOACYL_TRNA_BIOSYNTHESIS	41	35	0.132	0.496	0.437	0.392	0.571	0.574	0.947									0.821	1	0.559	1					0.837
KEGG_RENAL_CELL_CARCINOMA	70	60	0.0575	0.215	0.17	0.101	0.571	0.533	0.405	0.421	1	0.457	1					0.555	1	0.573	1					0.337	0.461
PID_EPOPATHWAY	34	29	0.1	0.558	0.201	0.0728	0.571	0.485	0.83	0.548	1	0.495	1					0.604	1	0.555	1					0.438
REACTOME_ER_PHAGOSOME_PATHWAY	61	37	0.0987	0.183	0.161	0.0452	0.572	0.655	0.772	0.0226	0.998	0.123	1					0.0355	1	0.0661	1	0.0125	0.961			0.103
KEGG_INOSITOL_PHOSPHATE_METABOLISM	54	47	0.0161	0.0654	0.162	0.0548	0.573	0.506	0.661	0.64	1	0.873	1					0.554	1	0.494	1	0.26	1			0.41
KEGG_ARGININE_AND_PROLINE_METABOLISM	54	38	0.11	0.366	0.216	0.254	0.574	0.658	0.569	0.197	1							0.438	1							0.304	0.324
ST_JAK_STAT_PATHWAY	9	8	0.683	0.641	0.486	0.477	0.574	0.589	0.855
PID_S1P_S1P2_PATHWAY	24	18	0.131	0.361	0.153	0.0735	0.574	0.551	0.412																	0.602
REACTOME_XENOBIOTICS	16	9	0.819	0.932	0.937	0.957	0.574	0.609	0.977
REACTOME_SHC_RELATED_EVENTS	17	12	0.264	0.196	0.0761	0.119	0.574	0.515	0.263																	0.446
PID_P38_MK2PATHWAY	21	15	0.121	0.0709	0.0935	0.0678	0.576	0.62	0.453																	0.545	0.143
REACTOME_RNA_POL_I_TRANSCRIPTION_TERMINATION	22	14	0.133	0.122	0.337	0.222	0.576	0.528	0.0934																	0.519	0.137
PID_FOXOPATHWAY	49	41	0.0392	0.0441	0.0451	0.00845	0.577	0.605	0.211	0.343	1	0.109	1	0.0364	0.998			0.342	1	0.252	1	0.0868	1			0.342	0.058
REACTOME_FORMATION_OF_THE_TERNARY_COMPLEX_AND_SUBSEQUENTLY_THE_43S_COMPLEX	74	23	0.364	0.502	0.155	0.235	0.577	0.734	0.815									0.464	1	0.267	1
PID_FANCONI_PATHWAY	47	38	0.378	0.661	0.176	0.534	0.578	0.595	0.861	0.528	1							0.439	1	0.433	1	0.0597	1			0.568	0.311
PID_NFKAPPABATYPICALPATHWAY	17	12	0.404	0.862	0.746	0.376	0.581	0.579	0.808
REACTOME_GABA_A_RECEPTOR_ACTIVATION	12	11	0.122	0.0987	0.0179	0.0134	0.583	0.458	0.186	0.226	1	0.28	1	0.0284	0.99			0.22	1	0.266	1	0.0265	0.998			0.017	0.123
PID_HEDGEHOG_2PATHWAY	22	15	0.278	0.688	0.478	0.822	0.584	0.488	0.756																	0.54
REACTOME_TRANSPORT_OF_GLUCOSE_AND_OTHER_SUGARS_BILE_SALTS_AND_ORGANIC_ACIDS_METAL_IONS_AND_AMINE_COMPOUNDS	89	74	0.0465	0.119	0.112	0.086	0.585	0.548	0.345	0.635	1	0.326	1	0.278	1			0.851	1	0.595	1					0.295	0.143
REACTOME_KERATAN_SULFATE_KERATIN_METABOLISM	30	24	0.332	0.165	0.0961	0.229	0.589	0.634	0.278																	0.707
KEGG_VALINE_LEUCINE_AND_ISOLEUCINE_BIOSYNTHESIS	11	8	0.122	0.074	0.0533	0.0354	0.59	0.573	0.0635																	0.352
REACTOME_EXTRACELLULAR_MATRIX_ORGANIZATION	87	70	0.0192	0.093	0.278	0.0475	0.592	0.449	0.284	0.356	1	0.25	1					0.524	1	0.418	1					0.063
ST_B_CELL_ANTIGEN_RECEPTOR	40	33	0.101	0.0742	0.0495	0.00557	0.594	0.525	0.407	0.508	1	0.472	1					0.635	1	0.592	1					0.496	0.268
REACTOME_ACTIVATION_OF_GENES_BY_ATF4	26	15	0.442	0.546	0.776	0.71	0.594	0.677	0.462
BIOCARTA_ATRBRCA_PATHWAY	21	19	0.528	0.789	0.404	0.608	0.596	0.577	0.944																	0.622
REACTOME_INTEGRIN_ALPHAIIB_BETA3_SIGNALING	27	23	0.171	0.173	0.026	0.0113	0.596	0.525	0.362	0.403	1	0.393	1					0.504	1	0.465	1					0.323	0.189
REACTOME_CDC6_ASSOCIATION_WITH_THE_ORC_ORIGIN_COMPLEX	11	9	0.578	0.437	0.469	0.309	0.598	0.669	0.0362
REACTOME_O_LINKED_GLYCOSYLATION_OF_MUCINS	59	44	0.0458	0.135	0.132	0.12	0.599	0.468	0.224	0.927	1	0.79	1					0.855	1	0.84	1					0.354
REACTOME_TAK1_ACTIVATES_NFKB_BY_PHOSPHORYLATION_AND_ACTIVATION_OF_IKKS_COMPLEX	23	16	0.09	0.00818	1e-05	1e-05	0.6	0.597	0.117	0.284	1	0.122	1	0.0088	0.899	0.0006	0.179	0.072	1	0.0636	1	0.0317	0.999	0.0018	0.355	0.193	0.009
BIOCARTA_ERK5_PATHWAY	18	14	0.324	0.34	0.0439	0.161	0.602	0.568	0.444																	0.532
KEGG_BLADDER_CANCER	42	33	0.187	0.33	0.6	0.76	0.603	0.627	0.702																	0.82
REACTOME_CTLA4_INHIBITORY_SIGNALING	21	17	0.577	0.834	0.237	0.469	0.603	0.572	0.48									0.438	1							0.588
PID_EPHBFWDPATHWAY	40	33	0.0701	0.0647	0.0241	0.00962	0.604	0.444	0.224	0.188	1	0.0238	0.999					0.266	1	0.04	1					0.487
ST_G_ALPHA_S_PATHWAY	16	13	0.146	0.215	0.0961	0.129	0.606	0.538	0.609	0.179	1	0.276	1					0.256	1	0.33	1					0.495
BIOCARTA_TID_PATHWAY	19	13	0.52	0.74	0.929	0.759	0.607	0.585	0.639																	0.498	0.128
KEGG_ALANINE_ASPARTATE_AND_GLUTAMATE_METABOLISM	32	26	0.41	0.384	0.27	0.231	0.608	0.573	0.473	0.421	1							0.61	1							0.36
BIOCARTA_CTCF_PATHWAY	23	18	0.253	0.599	0.51	0.668	0.608	0.572	0.849	0.417	1							0.539	1							0.603
REACTOME_G1_S_TRANSITION	112	71	0.135	0.0927	0.103	0.321	0.608	0.704	0.234	0.7	1	0.39	1					0.655	1	0.758	1					0.488
KEGG_MELANOMA	71	58	0.0859	0.195	0.531	0.419	0.609	0.549	0.508	0.92	1	0.844	1					0.947	1	0.882	1					0.571
BIOCARTA_IL2RB_PATHWAY	38	28	0.0494	0.175	0.0921	0.071	0.609	0.552	0.654	0.29	1	0.301	1					0.21	1	0.174	1					0.408
KEGG_HISTIDINE_METABOLISM	29	26	0.364	0.502	0.889	0.75	0.61	0.687	0.803
BIOCARTA_AGR_PATHWAY	36	30	0.0122	0.254	0.49	0.283	0.611	0.329	0.873	0.42	1	0.656	1					0.441	1	0.618	1					0.798	0.223
REACTOME_IRAK2_MEDIATED_ACTIVATION_OF_TAK1_COMPLEX_UPON_TLR7_8_OR_9_STIMULATION	9	7	0.228	0.072	0.0471	0.0422	0.612	0.614	0.584
KEGG_HEDGEHOG_SIGNALING_PATHWAY	56	42	0.209	0.647	0.243	0.537	0.613	0.627	0.732	0.591	1	0.252	1					0.725	1	0.381	1					0.344	0.339
REACTOME_LOSS_OF_NLP_FROM_MITOTIC_CENTROSOMES	59	44	0.0367	0.0167	0.0133	0.0427	0.614	0.58	0.698	0.0378	1	0.44	1					0.0442	1	0.154	1	0.127	1			0.021	0.367
REACTOME_CELL_EXTRACELLULAR_MATRIX_INTERACTIONS	14	12	0.135	0.152	0.29	0.162	0.614	0.6	0.456	0.289	1							0.118	1							0.454
REACTOME_IL_2_SIGNALING	41	27	0.117	0.169	0.0353	0.0217	0.614	0.557	0.489	0.338	1	0.342	1					0.271	1	0.215	1					0.403
PID_AR_PATHWAY	61	46	0.048	0.0851	0.0499	0.00688	0.616	0.55	0.36	0.28	1	0.0364	1					0.103	1	0.0878	1					0.215
REACTOME_RNA_POL_II_PRE_TRANSCRIPTION_EVENTS	61	39	0.376	0.551	0.335	0.202	0.617	0.636	0.315									0.231	1	0.209	1					0.854
PID_ER_NONGENOMIC_PATHWAY	41	34	0.0603	0.0351	0.0959	0.0493	0.618	0.526	0.228	0.75	1	0.378	1					0.803	1	0.449	1					0.081
REACTOME_TETRAHYDROBIOPTERIN_BH4_SYNTHESIS_RECYCLING_SALVAGE_AND_REGULATION	13	10	0.497	0.626	0.794	0.894	0.618	0.705	0.606
REACTOME_CALNEXIN_CALRETICULIN_CYCLE	11	7	0.373	0.145	0.147	0.153	0.619	0.654	0.274
PID_CD8TCRDOWNSTREAMPATHWAY	65	36	0.267	0.467	0.286	0.219	0.62	0.541	0.475	0.789	1							0.774	1							0.526	0.279
REACTOME_NCAM1_INTERACTIONS	39	34	0.111	0.51	0.368	0.275	0.62	0.527	0.608	0.44	1	0.251	1					0.613	1	0.417	1					0.089
REACTOME_TRANSMISSION_ACROSS_CHEMICAL_SYNAPSES	186	152	0.000159	0.00608	0.00247	0.00314	0.623	0.302	0.277	0.691	1	0.858	1	0.567	1			0.619	1	0.744	1	0.599	1			0.19	0.192
KEGG_NUCLEOTIDE_EXCISION_REPAIR	44	33	0.152	0.0879	0.0576	0.154	0.624	0.619	0.189
REACTOME_IMMUNE_SYSTEM	933	649	1.98e-08	0.0029	1e-05	1e-05	0.624	0.663	0.921	0.0006	0.339	0	0.095	0	0.092	0.0004	0.155	0.0073	0.942	0.0015	0.477	0.0003	0.123	0.0229	0.945	0.0008	0.00026
REACTOME_NA_CL_DEPENDENT_NEUROTRANSMITTER_TRANSPORTERS	17	15	0.265	0.506	0.626	0.49	0.626	0.592	0.635																	0.57
KEGG_TIGHT_JUNCTION	134	107	0.0244	0.0642	0.166	0.249	0.627	0.403	0.272	0.969	1	0.914	1	0.764	1			0.877	1	0.811	1	0.788	1			0.653	0.679
KEGG_RENIN_ANGIOTENSIN_SYSTEM	17	14	0.0753	0.0408	0.0202	0.135	0.627	0.667	0.378	0.136	1							0.321	1							0.156
KEGG_NEUROACTIVE_LIGAND_RECEPTOR_INTERACTION	272	193	0.00206	0.082	0.00083	0.0101	0.628	0.48	0.429	0.485	1	0.581	1	0.309	1			0.672	1	0.728	1	0.284	1			0.198	0.117
REACTOME_ANTIGEN_PROCESSING_UBIQUITINATION_PROTEASOME_DEGRADATION	212	151	0.0153	0.308	0.201	0.183	0.628	0.657	0.973	0.0626	1	0.0106	0.962	0.0472	1			0.125	1	0.0499	1	0.167	1			0.067	0.079
REACTOME_RESOLUTION_OF_AP_SITES_VIA_THE_SINGLE_NUCLEOTIDE_REPLACEMENT_PATHWAY	12	8	0.463	0.462	0.598	0.696	0.629	0.668	0.65
REACTOME_GAP_JUNCTION_DEGRADATION	10	8	0.412	0.349	0.561	0.254	0.63	0.589	0.393
REACTOME_VIF_MEDIATED_DEGRADATION_OF_APOBEC3G	52	32	0.279	0.203	0.425	0.447	0.63	0.706	0.797									0.584	1							0.471
PID_REG_GR_PATHWAY	82	57	0.0747	0.231	0.114	0.0298	0.631	0.67	0.59	0.069	1	0.0268	1	0.0802	1			0.0364	1	0.0258	0.999	0.0677	1			0.067	0.113
REACTOME_HDL_MEDIATED_LIPID_TRANSPORT	15	10	0.307	0.44	0.217	0.167	0.631	0.633	0.549
KEGG_OLFACTORY_TRANSDUCTION	389	107	0.117	0.0973	0.0428	0.0262	0.632	0.831	0.388	0.251	1	0.0396	1	0.193	1			0.903	1	0.526	1	0.557	1			0.792	0.655
WNT_SIGNALING	89	62	0.0927	0.101	0.291	0.137	0.633	0.651	0.264	0.282	1	0.152	1	0.0996	1			0.065	1	0.033	1	0.0494	1			0.089	0.115
REACTOME_MITOTIC_G2_G2_M_PHASES	81	61	0.0179	0.00399	0.00939	0.0125	0.633	0.617	0.473	0.0372	1	0.284	1					0.0246	1	0.128	1	0.194	1			0.033	0.466
PID_TCRJNKPATHWAY	14	12	0.135	0.204	0.443	0.392	0.635	0.607	0.761									0.374	1
BIOCARTA_ACTINY_PATHWAY	20	16	0.118	0.426	0.574	0.452	0.636	0.636	0.543
PID_INSULIN_GLUCOSE_PATHWAY	26	19	0.171	0.0108	0.0421	0.0785	0.636	0.631	0.0796	0.3	1	0.124	1					0.38	1	0.189	1					0.233	0.163
PID_TAP63PATHWAY	54	44	0.592	0.307	0.279	0.328	0.637	0.703	0.214	0.628	1							0.547	1	0.528	1					0.664
REACTOME_SYNTHESIS_OF_PIPS_AT_THE_GOLGI_MEMBRANE	17	16	0.192	0.497	0.0358	0.00742	0.641	0.599	0.912	0.366	1							0.0538	1	0.0568	1					0.186
PID_CERAMIDE_PATHWAY	48	31	0.198	0.209	0.309	0.38	0.642	0.56	0.395									0.788	1							0.793
REACTOME_CHEMOKINE_RECEPTORS_BIND_CHEMOKINES	57	18	0.622	0.493	0.71	0.69	0.642	0.787	0.539
REACTOME_TRNA_AMINOACYLATION	42	36	0.266	0.723	0.499	0.414	0.644	0.638	0.963									0.851	1	0.599	1					0.824
REACTOME_AMINE_COMPOUND_SLC_TRANSPORTERS	27	25	0.223	0.561	0.852	0.716	0.644	0.551	0.602																	0.718
REACTOME_METABOLISM_OF_MRNA	284	123	0.147	0.837	0.873	0.707	0.646	0.831	0.999									0.715	1	0.899	1					0.962
BIOCARTA_P38MAPK_PATHWAY	40	29	0.25	0.493	0.264	0.404	0.647	0.566	0.604									0.801	1							0.78
REACTOME_LIGAND_GATED_ION_CHANNEL_TRANSPORT	21	19	0.11	0.0455	0.0188	0.0169	0.648	0.523	0.109	0.458	1	0.446	1	0.0546	1			0.45	1	0.443	1	0.0568	1			0.057	0.161
BIOCARTA_RANKL_PATHWAY	14	9	0.522	0.774	0.91	0.788	0.649	0.686	0.844
REACTOME_PROCESSING_OF_CAPPED_INTRON_CONTAINING_PRE_MRNA	140	90	0.0692	0.534	0.157	0.137	0.65	0.765	0.981									0.982	1	0.895	1					0.841
REACTOME_SIGNALING_BY_BMP	23	21	0.301	0.348	0.391	0.283	0.651	0.647	0.637
BIOCARTA_EIF_PATHWAY	16	12	0.253	0.298	0.129	0.225	0.654	0.709	0.533
BIOCARTA_NGF_PATHWAY	18	12	0.373	0.364	0.0729	0.171	0.654	0.645	0.367																	0.459
REACTOME_FORMATION_OF_TRANSCRIPTION_COUPLED_NER_TC_NER_REPAIR_COMPLEX	30	18	0.206	0.0678	0.041	0.101	0.655	0.606	0.0661																	0.589
REACTOME_PERK_REGULATED_GENE_EXPRESSION	29	17	0.516	0.612	0.797	0.716	0.656	0.735	0.588
KEGG_PATHOGENIC_ESCHERICHIA_COLI_INFECTION	59	35	0.34	0.112	0.0312	0.05	0.658	0.666	0.126	0.757	1	0.453	1					0.725	1	0.672	1					0.558
REACTOME_SIGNAL_REGULATORY_PROTEIN_SIRP_FAMILY_INTERACTIONS	12	10	0.48	0.448	0.148	0.129	0.659	0.592	0.411																	0.395
KEGG_HYPERTROPHIC_CARDIOMYOPATHY_HCM	85	69	0.00434	0.00868	0.0837	0.108	0.661	0.457	0.728	0.248	1	0.563	1	0.602	1			0.232	1	0.29	1	0.302	1			0.248	0.148
REACTOME_CLASS_B_2_SECRETIN_FAMILY_RECEPTORS	88	56	0.276	0.236	0.555	0.49	0.661	0.753	0.646	0.489	1	0.44	1					0.623	1	0.722	1					0.538	0.427
REACTOME_POTASSIUM_CHANNELS	98	75	0.0175	0.231	0.575	0.534	0.661	0.507	0.654	0.997	1	0.959	1	0.51	1			0.993	1	0.927	1	0.569	1			0.893	0.543
PID_PS1PATHWAY	46	31	0.28	0.475	0.29	0.248	0.664	0.636	0.643	0.292	1	0.304	1					0.239	1	0.458	1					0.422	0.273
REACTOME_PROLONGED_ERK_ACTIVATION_EVENTS	19	16	0.342	0.837	0.976	0.971	0.664	0.6	0.818
REACTOME_HORMONE_LIGAND_BINDING_RECEPTORS	10	8	0.642	0.578	0.329	0.546	0.664	0.726	0.312
REACTOME_NFKB_ACTIVATION_THROUGH_FADD_RIP1_PATHWAY_MEDIATED_BY_CASPASE_8_AND10	12	9	0.808	0.775	0.773	0.86	0.664	0.647	0.189
REACTOME_INFLAMMASOMES	17	12	0.36	0.471	0.00544	0.0514	0.664	0.636	0.428																	0.476	0.111
BIOCARTA_CDC42RAC_PATHWAY	16	13	0.16	0.376	0.241	0.291	0.665	0.677	0.367
KEGG_APOPTOSIS	88	66	0.162	0.558	0.251	0.298	0.666	0.641	0.589	0.743	1	0.649	1					0.711	1	0.569	1					0.427
BIOCARTA_PGC1A_PATHWAY	26	20	0.329	0.0594	0.0215	0.084	0.666	0.612	0.254	0.57	1	0.293	1					0.349	1	0.131	1	0.0515	1			0.274	0.196
ST_INTERLEUKIN_13_PATHWAY	7	6	0.499	0.09	0.384	0.289	0.666	0.676	0.299
ST_IL_13_PATHWAY	7	6	0.499	0.09	0.384	0.289	0.666	0.676	0.299
REACTOME_IL1_SIGNALING	39	33	0.0277	0.0744	0.00022	1e-05	0.666	0.6	0.544	0.7	1	0.399	1					0.35	1	0.275	1					0.506	0.282
KEGG_ADIPOCYTOKINE_SIGNALING_PATHWAY	67	51	0.0713	0.0391	0.0052	0.0169	0.667	0.645	0.304	0.162	1	0.167	1	0.0188	0.976	0.0082	0.675	0.255	1	0.207	1	0.0101	0.935	0.017	0.911	0.038	0.01
PID_HIF2PATHWAY	34	24	0.0346	0.0357	0.0437	0.00641	0.668	0.691	0.212	0.132	1	0.178	1					0.296	1	0.331	1					0.36	0.244
PID_IL2_STAT5PATHWAY	30	25	0.46	0.528	0.272	0.276	0.669	0.667	0.704																	0.743
REACTOME_RAP1_SIGNALLING	17	13	0.206	0.11	0.249	0.0807	0.669	0.545	0.206	0.674	1	0.4	1					0.751	1	0.447	1					0.459
SA_B_CELL_RECEPTOR_COMPLEXES	24	18	0.288	0.105	0.0557	0.0119	0.67	0.515	0.293	0.451	1	0.435	1					0.463	1	0.455	1					0.581
SA_FAS_SIGNALING	9	9	0.74	0.529	0.588	0.43	0.67	0.649	0.259
BIOCARTA_RARRXR_PATHWAY	15	12	0.5	0.357	0.212	0.0735	0.671	0.628	0.477																	0.45	0.103
PID_PDGFRAPATHWAY	22	18	0.28	0.477	0.45	0.223	0.671	0.66	0.659																	0.614
REACTOME_VITAMIN_B5_PANTOTHENATE_METABOLISM	11	8	0.597	0.54	0.681	0.703	0.671	0.726	0.514
ST_JNK_MAPK_PATHWAY	40	32	0.203	0.745	0.625	0.772	0.672	0.635	0.839
PID_ERA_GENOMIC_PATHWAY	65	40	0.0974	0.33	0.717	0.356	0.672	0.607	0.583	0.925	1	0.686	1	0.132	1			0.965	1	0.815	1	0.241	1			0.876	0.324
REACTOME_DEFENSINS	51	18	0.463	0.52	0.705	0.43	0.672	0.8	0.745
SIG_IL4RECEPTOR_IN_B_LYPHOCYTES	27	23	0.238	0.254	0.384	0.135	0.674	0.644	0.474																	0.69
REACTOME_MRNA_3_END_PROCESSING	35	21	0.302	0.609	0.228	0.248	0.676	0.78	0.868																	0.644
REACTOME_MRNA_DECAY_BY_3_TO_5_EXORIBONUCLEASE	11	6	0.49	0.603	0.637	0.557	0.676	0.735	0.552
REACTOME_SIGNALING_BY_NOTCH1	70	51	0.204	0.568	0.654	0.65	0.677	0.586	0.716	0.92	1	0.608	1					0.848	1	0.463	1					0.488
REACTOME_PI_3K_CASCADE	56	45	0.102	0.178	0.293	0.0465	0.677	0.691	0.528	0.426	1	0.391	1					0.624	1	0.582	1					0.671
REACTOME_ADP_SIGNALLING_THROUGH_P2RY12	21	15	0.565	0.208	0.328	0.445	0.678	0.704	0.528
REACTOME_TRIF_MEDIATED_TLR3_SIGNALING	74	51	0.0523	0.16	1e-05	3e-05	0.68	0.676	0.651	0.668	1	0.296	1	0.0872	1	0.0052	0.552	0.291	1	0.283	1	0.182	1	0.018	0.917	0.274	0.098
REACTOME_SIGNALING_BY_ROBO_RECEPTOR	30	27	0.0434	0.117	0.105	0.0469	0.68	0.466	0.293	0.765	1	0.615	1					0.752	1	0.589	1					0.4
BIOCARTA_CALCINEURIN_PATHWAY	21	16	0.463	0.183	0.235	0.192	0.681	0.629	0.248	0.642	1							0.671	1							0.17	0.146
REACTOME_CDK_MEDIATED_PHOSPHORYLATION_AND_REMOVAL_OF_CDC6	48	30	0.375	0.27	0.451	0.497	0.681	0.758	0.842									0.529	1							0.446
REACTOME_NUCLEAR_RECEPTOR_TRANSCRIPTION_PATHWAY	49	36	0.184	0.282	0.235	0.152	0.682	0.613	0.513	0.696	1	0.812	1					0.467	1	0.499	1					0.54
REACTOME_MUSCLE_CONTRACTION	48	36	0.192	0.143	0.165	0.21	0.682	0.648	0.54	0.231	1	0.681	1					0.216	1	0.495	1					0.531	0.31
REACTOME_DESTABILIZATION_OF_MRNA_BY_AUF1_HNRNP_D0	53	30	0.337	0.298	0.473	0.534	0.682	0.758	0.858									0.556	1							0.444
BIOCARTA_ARF_PATHWAY	17	13	0.592	0.569	0.484	0.679	0.683	0.68	0.476
REACTOME_APOPTOTIC_CLEAVAGE_OF_CELLULAR_PROTEINS	40	32	0.256	0.777	0.00857	0.359	0.684	0.633	0.899	0.323	1	0.0738	1					0.499	1	0.165	1					0.062	0.269
REACTOME_GLYCOPROTEIN_HORMONES	12	4	0.75	0.55	0.395	0.532	0.684	0.751	0.554
REACTOME_SYNTHESIS_SECRETION_AND_INACTIVATION_OF_GLP1	19	12	0.564	0.677	0.915	0.872	0.684	0.777	0.781
KEGG_NON_SMALL_CELL_LUNG_CANCER	54	48	0.064	0.0307	0.215	0.273	0.686	0.553	0.195	0.938	1	0.902	1					0.972	1	0.949	1					0.697
REACTOME_RNA_POL_I_TRANSCRIPTION	89	23	0.179	0.0457	0.195	0.179	0.686	0.683	0.0526																	0.685	0.236
BIOCARTA_BCR_PATHWAY	37	25	0.336	0.122	0.111	0.0544	0.688	0.572	0.145	0.622	1	0.573	1					0.698	1	0.634	1					0.36	0.232
BIOCARTA_GH_PATHWAY	28	20	0.167	0.0396	0.137	0.223	0.688	0.604	0.221																	0.634
REACTOME_ORC1_REMOVAL_FROM_CHROMATIN	67	44	0.427	0.406	0.716	0.715	0.688	0.781	0.574									0.745	1							0.655
REACTOME_P53_INDEPENDENT_G1_S_DNA_DAMAGE_CHECKPOINT	51	32	0.302	0.225	0.457	0.432	0.69	0.739	0.786									0.597	1							0.474
REACTOME_AMINO_ACID_AND_OLIGOPEPTIDE_SLC_TRANSPORTERS	49	44	0.255	0.419	0.335	0.582	0.692	0.716	0.607	0.76	1							0.905	1							0.895
PID_RETINOIC_ACID_PATHWAY	30	24	0.107	0.358	0.376	0.0662	0.693	0.609	0.782	0.713	1	0.414	1					0.838	1	0.597	1					0.361	0.237
KEGG_LONG_TERM_POTENTIATION	70	59	0.0255	0.0396	0.0603	0.0943	0.694	0.447	0.239	0.841	1	0.63	1					0.869	1	0.676	1					0.356	0.478
BIOCARTA_PDGF_PATHWAY	32	24	0.174	0.177	0.0374	0.154	0.694	0.623	0.463	0.706	1	0.416	1					0.765	1	0.481	1					0.346	0.223
PID_ECADHERIN_KERATINOCYTE_PATHWAY	21	17	0.321	0.333	0.112	0.216	0.694	0.652	0.336	0.556	1	0.281	1					0.681	1	0.355	1					0.037
SA_PROGRAMMED_CELL_DEATH	12	9	0.235	0.254	0.616	0.482	0.695	0.68	0.474
PID_RAS_PATHWAY	30	24	0.14	0.1	0.149	0.118	0.695	0.562	0.348	0.734	1	0.671	1					0.766	1	0.709	1					0.346
REACTOME_SULFUR_AMINO_ACID_METABOLISM	24	22	0.15	0.313	0.541	0.257	0.696	0.755	0.43	0.058	1							0.185	1							0.1
PID_WNT_CANONICAL_PATHWAY	20	15	0.592	0.529	0.455	0.466	0.697	0.658	0.514
REACTOME_RESPONSE_TO_ELEVATED_PLATELET_CYTOSOLIC_CA2_	89	61	0.0457	0.0359	0.00194	0.00743	0.697	0.656	0.502	0.67	1	0.865	1	0.222	1			0.685	1	0.783	1	0.337	1			0.612	0.131
REACTOME_DESTABILIZATION_OF_MRNA_BY_KSRP	17	10	0.475	0.697	0.859	0.595	0.697	0.752	0.723
KEGG_PHOSPHATIDYLINOSITOL_SIGNALING_SYSTEM	76	66	0.0174	0.151	0.34	0.185	0.699	0.566	0.756	0.439	1	0.954	1					0.378	1	0.756	1	0.504	1			0.234
KEGG_GLIOMA	65	55	0.177	0.145	0.0497	0.0882	0.699	0.627	0.418	0.768	1	0.583	1					0.834	1	0.673	1					0.274	0.416
REACTOME_E2F_ENABLED_INHIBITION_OF_PRE_REPLICATION_COMPLEX_FORMATION	10	9	0.598	0.627	0.705	0.523	0.7	0.742	0.0743
KEGG_PYRUVATE_METABOLISM	40	29	0.171	0.347	0.45	0.404	0.702	0.712	0.613
KEGG_CHEMOKINE_SIGNALING_PATHWAY	190	121	0.0174	0.0121	0.00538	0.00081	0.702	0.601	0.147	0.669	1	0.171	1	0.6	1			0.792	1	0.341	1	0.724	1			0.566	0.335
REACTOME_APOPTOSIS_INDUCED_DNA_FRAGMENTATION	13	3	0.539	0.351	0.535	0.562	0.702	0.725	0.418
KEGG_LIMONENE_AND_PINENE_DEGRADATION	10	8	0.72	0.971	0.966	0.982	0.704	0.743	0.958
PID_CD8TCRPATHWAY	53	45	0.0992	0.228	0.0878	0.105	0.704	0.65	0.454	0.66	1	0.78	1					0.391	1	0.617	1					0.398
REACTOME_SHC1_EVENTS_IN_EGFR_SIGNALING	15	11	0.392	0.191	0.0759	0.294	0.704	0.635	0.271																	0.43
REACTOME_SYNTHESIS_OF_SUBSTRATES_IN_N_GLYCAN_BIOSYTHESIS	14	6	0.49	0.818	0.815	0.714	0.704	0.718	0.94
REACTOME_DEVELOPMENTAL_BIOLOGY	396	312	2.66e-05	0.0725	0.128	0.0442	0.705	0.354	0.611	0.997	1	0.987	1	0.992	1			0.98	1	0.862	1	0.875	1			0.862	0.953
BIOCARTA_MCM_PATHWAY	18	12	0.719	0.755	0.962	0.931	0.708	0.766	0.151
ST_G_ALPHA_I_PATHWAY	35	32	0.0232	0.00523	0.0116	0.0379	0.709	0.578	0.469	0.201	1	0.0856	1	0.167	1			0.244	1	0.11	1	0.172	1	0.0142	0.889	0.018	0.035
REACTOME_ACTIVATION_OF_KAINATE_RECEPTORS_UPON_GLUTAMATE_BINDING	31	25	0.0693	0.0112	0.0801	0.0601	0.709	0.607	0.233	0.947	1							0.944	1							0.744
PID_MAPKTRKPATHWAY	34	27	0.327	0.75	0.525	0.553	0.711	0.687	0.818
REACTOME_ACTIVATION_OF_CHAPERONE_GENES_BY_ATF6_ALPHA	11	4	0.804	0.844	0.92	0.992	0.711	0.739	0.749
ST_TUMOR_NECROSIS_FACTOR_PATHWAY	29	18	0.662	0.88	0.872	0.593	0.713	0.75	0.863
REACTOME_MEMBRANE_BINDING_AND_TARGETTING_OF_GAG_PROTEINS	10	7	0.0629	0.03	0.175	0.0839	0.714	0.768	0.0966
REACTOME_ELEVATION_OF_CYTOSOLIC_CA2_LEVELS	10	8	0.278	0.893	0.916	0.896	0.716	0.636	0.948
BIOCARTA_NKCELLS_PATHWAY	20	14	0.39	0.452	0.321	0.206	0.717	0.708	0.239									0.41	1
BIOCARTA_TRKA_PATHWAY	12	10	0.504	0.309	0.231	0.371	0.717	0.627	0.319																	0.416
PID_PI3KCIAKTPATHWAY	35	26	0.142	0.196	0.561	0.143	0.717	0.655	0.583	0.584	1							0.618	1							0.738	0.216
REACTOME_MAPK_TARGETS_NUCLEAR_EVENTS_MEDIATED_BY_MAP_KINASES	30	22	0.352	0.915	0.606	0.613	0.717	0.68	0.942																	0.651
BIOCARTA_HDAC_PATHWAY	32	25	0.465	0.339	0.165	0.162	0.718	0.648	0.463																	0.726	0.228
KEGG_GLYCINE_SERINE_AND_THREONINE_METABOLISM	31	20	0.337	0.0615	0.0805	0.0292	0.72	0.755	0.163	0.211	1	0.0886	1					0.453	1	0.259	1					0.274	0.176
KEGG_LYSINE_DEGRADATION	44	36	0.274	0.467	0.283	0.264	0.72	0.72	0.389	0.459	1							0.635	1							0.546
REACTOME_LIPOPROTEIN_METABOLISM	28	21	0.396	0.293	0.0741	0.0326	0.72	0.755	0.267	0.535	1	0.263	1					0.369	1	0.411	1
REACTOME_ROLE_OF_SECOND_MESSENGERS_IN_NETRIN1_SIGNALING	11	9	0.253	0.627	0.477	0.495	0.721	0.568	0.731	0.671	1							0.646	1
REACTOME_TRANSCRIPTIONAL_REGULATION_OF_WHITE_ADIPOCYTE_DIFFERENTIATION	72	49	0.0981	0.204	0.12	0.0541	0.721	0.724	0.6	0.392	1	0.28	1					0.0374	1	0.0026	0.643	0.0336	1			0.233	0.397
BIOCARTA_RHO_PATHWAY	32	24	0.0427	0.0507	0.13	0.0849	0.722	0.714	0.349	0.546	1							0.365	1	0.14	1					0.322
BIOCARTA_BARR_MAPK_PATHWAY	12	9	0.296	0.259	0.54	0.448	0.722	0.612	0.478																	0.381
REACTOME_MITOCHONDRIAL_TRNA_AMINOACYLATION	21	18	0.446	0.961	0.738	0.711	0.722	0.716	1
PID_IFNGPATHWAY	40	32	0.189	0.217	0.0055	0.00146	0.723	0.66	0.82	0.0352	1	0.0036	0.717	0.0006	0.214	0.0048	0.529	0.0335	1	0.0019	0.548	0.0027	0.57	0.0118	0.855	0.00432	0.00032
REACTOME_MEIOTIC_RECOMBINATION	86	27	0.774	0.371	0.763	0.872	0.724	0.743	0.898
PID_ALK1PATHWAY	26	18	0.512	0.913	0.978	0.97	0.726	0.729	0.923									0.45	1							0.602
REACTOME_VIRAL_MESSENGER_RNA_SYNTHESIS	14	5	0.586	0.605	0.283	0.253	0.726	0.664	0.737																	0.228
BIOCARTA_FCER1_PATHWAY	41	30	0.363	0.379	0.236	0.184	0.727	0.649	0.437	0.553	1	0.515	1					0.71	1	0.673	1					0.453	0.261
PID_TCRRASPATHWAY	14	9	0.334	0.542	0.649	0.666	0.727	0.615	0.656
BIOCARTA_RANMS_PATHWAY	10	6	0.629	0.279	0.55	0.561	0.728	0.734	0.091
REACTOME_NOTCH_HLH_TRANSCRIPTION_PATHWAY	13	11	0.0992	0.0712	0.148	0.14	0.728	0.623	0.287	0.135	1	0.033	1					0.0555	1	0.0093	0.961					0.013
PID_SHP2_PATHWAY	58	48	0.261	0.45	0.447	0.434	0.729	0.642	0.594	0.888	1	0.557	1					0.945	1	0.672	1					0.448	0.392
PID_ALK2PATHWAY	11	8	0.567	0.777	0.871	0.84	0.729	0.702	0.808
REACTOME_NEF_MEDIATED_DOWNREGULATION_OF_MHC_CLASS_I_COMPLEX_CELL_SURFACE_EXPRESSION	10	7	0.441	0.356	0.508	0.303	0.729	0.713	0.312									0.0703	1							0.295
REACTOME_CLEAVAGE_OF_GROWING_TRANSCRIPT_IN_THE_TERMINATION_REGION_	44	27	0.437	0.796	0.425	0.513	0.729	0.841	0.944																	0.751
REACTOME_CHYLOMICRON_MEDIATED_LIPID_TRANSPORT	16	10	0.62	0.432	0.134	0.105	0.729	0.778	0.284
REACTOME_PLATELET_CALCIUM_HOMEOSTASIS	18	14	0.208	0.415	0.251	0.152	0.73	0.598	0.713	0.797	1	0.491	1					0.815	1	0.55	1
BIOCARTA_GABA_PATHWAY	10	9	0.317	0.419	0.205	0.104	0.731	0.697	0.767	0.152	1							0.176	1							0.067	0.084
REACTOME_CD28_DEPENDENT_PI3K_AKT_SIGNALING	22	18	0.408	0.865	0.467	0.239	0.731	0.702	0.981	0.391	1							0.169	1	0.196	1					0.611
BIOCARTA_MET_PATHWAY	37	30	0.247	0.325	0.197	0.39	0.732	0.662	0.543	0.814	1	0.507	1					0.862	1	0.619	1					0.438	0.25
REACTOME_COLLAGEN_FORMATION	58	50	0.081	0.12	0.228	0.0309	0.732	0.524	0.154	0.25	1	0.184	1					0.325	1	0.274	1					0.009
REACTOME_REVERSIBLE_HYDRATION_OF_CARBON_DIOXIDE	12	10	0.439	0.663	0.482	0.43	0.732	0.795	0.911
REACTOME_APOPTOTIC_EXECUTION_PHASE	54	36	0.277	0.756	0.0109	0.37	0.732	0.685	0.857	0.371	1	0.097	1					0.577	1	0.215	1					0.112	0.309
PID_DNAPK_PATHWAY	16	12	0.155	0.368	0.404	0.175	0.733	0.699	0.222
BIOCARTA_FMLP_PATHWAY	39	25	0.413	0.221	0.0416	0.0181	0.736	0.625	0.349	0.831	1	0.556	1	0.0754	1			0.883	1	0.637	1	0.0943	1			0.382	0.218
PID_HNF3APATHWAY	44	28	0.311	0.629	0.67	0.48	0.736	0.709	0.73	0.597	1	0.259	1	0.0966	1			0.767	1	0.413	1	0.181	1			0.417	0.256
REACTOME_KERATAN_SULFATE_BIOSYNTHESIS	26	20	0.553	0.238	0.0999	0.234	0.736	0.772	0.324																	0.656
BIOCARTA_RELA_PATHWAY	16	8	0.53	0.34	0.564	0.212	0.737	0.723	0.122																	0.331
REACTOME_ARMS_MEDIATED_ACTIVATION	17	14	0.436	0.831	0.955	0.952	0.738	0.681	0.806
REACTOME_NOTCH1_INTRACELLULAR_DOMAIN_REGULATES_TRANSCRIPTION	46	36	0.19	0.488	0.726	0.693	0.739	0.666	0.721	0.921	1	0.683	1					0.805	1	0.462	1					0.533
BIOCARTA_LAIR_PATHWAY	17	15	0.324	0.465	0.0904	0.12	0.741	0.754	0.876	0.258	1							0.357	1	0.182	1					0.542	0.125
REACTOME_METAL_ION_SLC_TRANSPORTERS	22	17	0.414	0.607	0.685	0.4	0.741	0.765	0.835									0.49	1	0.323	1					0.575
REACTOME_ASSEMBLY_OF_THE_PRE_REPLICATIVE_COMPLEX	65	41	0.43	0.371	0.577	0.552	0.741	0.825	0.583									0.719	1							0.587
BIOCARTA_CDK5_PATHWAY	11	7	0.669	0.591	0.851	0.793	0.742	0.728	0.404
REACTOME_RAF_MAP_KINASE_CASCADE	10	7	0.502	0.569	0.646	0.733	0.744	0.719	0.629
REACTOME_ACTIVATION_OF_THE_PRE_REPLICATIVE_COMPLEX	31	22	0.54	0.116	0.0909	0.248	0.745	0.786	0.0603
REACTOME_MAP_KINASE_ACTIVATION_IN_TLR_CASCADE	50	37	0.126	0.4	4e-05	0.00055	0.745	0.698	0.897									0.657	1							0.601	0.299
KEGG_PYRIMIDINE_METABOLISM	98	67	0.115	0.336	0.0709	0.0819	0.747	0.726	0.819	0.524	1	0.651	1					0.439	1	0.85	1					0.407
PID_AP1_PATHWAY	70	44	0.357	0.529	0.704	0.368	0.747	0.819	0.585									0.312	1	0.183	1	0.0037	0.673	0.0166	0.908	0.898	0.38
REACTOME_SIGNALING_BY_CONSTITUTIVELY_ACTIVE_EGFR	18	14	0.435	0.279	0.096	0.4	0.747	0.737	0.471																	0.495
REACTOME_FORMATION_OF_INCISION_COMPLEX_IN_GG_NER	23	17	0.352	0.114	0.101	0.334	0.749	0.732	0.202
KEGG_PANCREATIC_CANCER	70	62	0.105	0.212	0.234	0.412	0.75	0.691	0.432	0.681	1							0.772	1							0.404	0.468
REACTOME_MRNA_PROCESSING	161	105	0.072	0.556	0.179	0.0535	0.751	0.826	0.98	0.878	1	0.608	1					0.976	1	0.836	1					0.782
BIOCARTA_CREB_PATHWAY	27	23	0.139	0.183	0.0289	0.0309	0.754	0.666	0.451	0.199	1	0.169	1					0.24	1	0.2	1					0.026	0.217
SA_CASPASE_CASCADE	19	17	0.527	0.511	0.491	0.554	0.755	0.776	0.729
PID_FASPATHWAY	38	30	0.507	0.334	0.508	0.41	0.755	0.743	0.317
BIOCARTA_MONOCYTE_PATHWAY	11	10	0.408	0.607	0.0846	0.409	0.758	0.781	0.923									0.22	1
BIOCARTA_STEM_PATHWAY	15	8	0.337	0.281	0.15	0.0905	0.759	0.78	0.591
BIOCARTA_MAL_PATHWAY	19	13	0.392	0.371	0.634	0.595	0.76	0.756	0.665
REACTOME_REGULATION_OF_ORNITHINE_DECARBOXYLASE_ODC	49	31	0.347	0.189	0.359	0.432	0.76	0.82	0.812									0.297	1							0.468
BIOCARTA_CXCR4_PATHWAY	24	19	0.232	0.263	0.23	0.142	0.761	0.645	0.643																	0.634
BIOCARTA_BAD_PATHWAY	26	20	0.114	0.463	0.123	0.184	0.761	0.698	0.718									0.597	1	0.326	1					0.621
REACTOME_RECRUITMENT_OF_MITOTIC_CENTROSOME_PROTEINS_AND_COMPLEXES	66	50	0.0616	0.0139	0.0123	0.0434	0.761	0.73	0.626	0.0214	0.998	0.236	1					0.0273	1	0.0792	1	0.148	1			0.012	0.413
ST_FAS_SIGNALING_PATHWAY	65	42	0.682	0.719	0.381	0.466	0.762	0.733	0.583									0.938	1	0.773	1	0.124	1	0.0112	0.848	0.894
REACTOME_G_BETA_GAMMA_SIGNALLING_THROUGH_PLC_BETA	20	14	0.231	0.0143	0.309	0.3	0.763	0.739	0.218																	0.519
BIOCARTA_EIF2_PATHWAY	11	9	0.656	0.431	0.559	0.574	0.764	0.778	0.591
REACTOME_GPVI_MEDIATED_ACTIVATION_CASCADE	31	26	0.416	0.328	0.0272	0.0171	0.764	0.721	0.356	0.244	1	0.467	1					0.354	1	0.594	1					0.361
REACTOME_MRNA_SPLICING	111	66	0.181	0.576	0.349	0.227	0.766	0.864	0.989									0.931	1	0.77	1					0.66
REACTOME_SIGNALING_BY_WNT	65	42	0.4	0.654	0.767	0.802	0.767	0.803	0.877									0.519	1							0.361
REACTOME_TRANSCRIPTION	210	102	0.104	0.28	0.2	0.0385	0.767	0.853	0.712	0.559	1	0.187	1	0.022	0.985			0.281	1	0.168	1	0.2	1			0.248	0.284
SA_G1_AND_S_PHASES	15	11	0.459	0.219	0.427	0.45	0.768	0.81	0.62
REACTOME_ANDROGEN_BIOSYNTHESIS	10	9	0.662	0.417	0.389	0.172	0.768	0.83	0.76																	0.356
REACTOME_RIG_I_MDA5_MEDIATED_INDUCTION_OF_IFN_ALPHA_BETA_PATHWAYS	73	40	0.288	0.0751	2e-05	3e-05	0.768	0.802	0.286	0.0074	0.937	0	0.095	0	0.092	0.0014	0.276	0.0115	0.986	0.0007	0.279	0.0011	0.316	0.011	0.844	0.014	0.00059
REACTOME_G_ALPHA_Q_SIGNALLING_EVENTS	184	134	0.00413	0.00018	0.00626	0.0475	0.769	0.745	0.115	0.928	1	0.821	1	0.646	1			0.976	1	0.944	1	0.793	1			0.659	0.392
REACTOME_ADVANCED_GLYCOSYLATION_ENDPRODUCT_RECEPTOR_SIGNALING	13	7	0.359	0.0699	0.00097	0.00232	0.769	0.768	0.343									0.232	1	0.0885	1					0.32	0.085
PID_ERBB1_RECEPTOR_PROXIMAL_PATHWAY	35	30	0.488	0.43	0.00645	0.0309	0.771	0.714	0.551	0.208	1	0.043	1					0.314	1	0.0744	1					0.067	0.244
REACTOME_AMINO_ACID_TRANSPORT_ACROSS_THE_PLASMA_MEMBRANE	31	28	0.427	0.668	0.309	0.67	0.771	0.812	0.846																	0.781
PID_TNFPATHWAY	46	33	0.307	0.272	0.00197	0.0234	0.773	0.746	0.706									0.532	1							0.82	0.308
REACTOME_NEUROTRANSMITTER_RECEPTOR_BINDING_AND_DOWNSTREAM_TRANSMISSION_IN_THE_POSTSYNAPTIC_CELL	137	111	0.00161	0.00165	0.00021	0.00019	0.773	0.507	0.164	0.463	1	0.572	1	0.31	1			0.442	1	0.476	1	0.336	1			0.104	0.105
BIOCARTA_IGF1R_PATHWAY	23	18	0.127	0.152	0.0492	0.075	0.774	0.735	0.316																	0.594
BIOCARTA_BARRESTIN_SRC_PATHWAY	15	11	0.364	0.334	0.554	0.437	0.774	0.688	0.627																	0.439
REACTOME_NFKB_AND_MAP_KINASES_ACTIVATION_MEDIATED_BY_TLR4_SIGNALING_REPERTOIRE	72	51	0.107	0.3	1e-05	3e-05	0.775	0.768	0.697	0.871	1	0.588	1	0.0894	1	0.0054	0.563	0.49	1	0.532	1	0.191	1	0.0191	0.926	0.477	0.088
REACTOME_ABORTIVE_ELONGATION_OF_HIV1_TRANSCRIPT_IN_THE_ABSENCE_OF_TAT	23	12	0.546	0.72	0.147	0.185	0.775	0.778	0.785									0.25	1							0.447
BIOCARTA_IL2_PATHWAY	22	14	0.328	0.37	0.0684	0.0973	0.776	0.752	0.645	0.272	1							0.407	1							0.516
BIOCARTA_P53_PATHWAY	16	12	0.54	0.523	0.873	0.821	0.776	0.775	0.593
PID_HEDGEHOG_GLIPATHWAY	48	39	0.32	0.341	0.327	0.491	0.776	0.766	0.651									0.669	1							0.875
REACTOME_DNA_REPAIR	112	77	0.0761	0.0857	0.0564	0.0733	0.776	0.739	0.346	0.743	1	0.649	1					0.505	1	0.289	1	0.289	1			0.74	0.539
PID_IL2_PI3KPATHWAY	34	27	0.537	0.919	0.505	0.267	0.777	0.749	0.981	0.703	1	0.398	1					0.489	1	0.199	1					0.412
PID_THROMBIN_PAR1_PATHWAY	43	39	0.233	0.183	0.405	0.232	0.777	0.722	0.605																	0.591
REACTOME_OLFACTORY_SIGNALING_PATHWAY	328	75	0.335	0.279	0.243	0.386	0.777	0.931	0.755	0.442	1	0.208	1					0.949	1	0.783	1					0.905
REACTOME_DESTABILIZATION_OF_MRNA_BY_TRISTETRAPROLIN_TTP	17	11	0.534	0.492	0.412	0.43	0.778	0.841	0.587
KEGG_TASTE_TRANSDUCTION	52	22	0.124	0.133	0.324	0.35	0.781	0.693	0.508	0.289	1	0.628	1					0.55	1	0.737	1					0.293
REACTOME_PROSTACYCLIN_SIGNALLING_THROUGH_PROSTACYCLIN_RECEPTOR	19	12	0.461	0.042	0.135	0.175	0.781	0.793	0.255																	0.425
REACTOME_TRAF6_MEDIATED_IRF7_ACTIVATION	30	12	0.589	0.408	0.127	0.027	0.781	0.787	0.346	0.0896	1	0.032	1					0.0503	1	0.0163	0.995					0.125
KEGG_ALDOSTERONE_REGULATED_SODIUM_REABSORPTION	42	32	0.26	0.291	0.295	0.202	0.782	0.73	0.562	0.702	1							0.789	1							0.808
BIOCARTA_GLEEVEC_PATHWAY	23	18	0.213	0.184	0.101	0.065	0.782	0.765	0.728																	0.598
PID_S1P_S1P4_PATHWAY	14	10	0.289	0.654	0.838	0.555	0.782	0.777	0.738
PID_RHOA_REG_PATHWAY	46	36	0.112	0.283	0.236	0.0568	0.782	0.586	0.668	0.664	1	0.423	1					0.702	1	0.475	1					0.569
REACTOME_BRANCHED_CHAIN_AMINO_ACID_CATABOLISM	17	15	0.268	0.165	0.105	0.0345	0.782	0.735	0.378	0.392	1	0.179	1					0.495	1	0.253	1					0.172
BIOCARTA_NDKDYNAMIN_PATHWAY	21	17	0.671	0.499	0.514	0.689	0.783	0.789	0.7
BIOCARTA_LONGEVITY_PATHWAY	15	11	0.552	0.562	0.283	0.3	0.783	0.762	0.749
BIOCARTA_SALMONELLA_PATHWAY	13	10	0.27	0.374	0.493	0.412	0.784	0.808	0.465
REACTOME_METABOLISM_OF_VITAMINS_AND_COFACTORS	51	41	0.528	0.861	0.898	0.939	0.784	0.831	0.918
REACTOME_ACETYLCHOLINE_BINDING_AND_DOWNSTREAM_EVENTS	16	10	0.777	0.902	0.951	0.934	0.784	0.826	0.833
SA_TRKA_RECEPTOR	17	12	0.736	0.554	0.17	0.335	0.785	0.762	0.341																	0.455
REACTOME_REGULATION_OF_INSULIN_SECRETION_BY_ACETYLCHOLINE	11	9	0.22	0.0781	0.341	0.209	0.786	0.648	0.225																	0.076
KEGG_ARRHYTHMOGENIC_RIGHT_VENTRICULAR_CARDIOMYOPATHY_ARVC	76	64	0.0322	0.033	0.104	0.142	0.787	0.459	0.603	0.56	1	0.798	1					0.602	1	0.659	1	0.695	1			0.603	0.463
BIOCARTA_PARKIN_PATHWAY	13	10	0.302	0.779	0.78	0.698	0.787	0.645	0.855
PID_ANTHRAXPATHWAY	17	11	0.395	0.453	0.253	0.198	0.789	0.727	0.575																	0.46
REACTOME_INTEGRATION_OF_PROVIRUS	16	6	0.16	0.273	0.499	0.222	0.789	0.79	0.132
REACTOME_ENOS_ACTIVATION_AND_REGULATION	20	16	0.676	0.919	0.977	0.983	0.79	0.825	0.974
BIOCARTA_CHEMICAL_PATHWAY	22	20	0.301	0.138	0.674	0.561	0.791	0.73	0.29																	0.619
PID_TOLL_ENDOGENOUS_PATHWAY	25	15	0.558	0.524	0.766	0.688	0.791	0.847	0.432
REACTOME_SYNTHESIS_AND_INTERCONVERSION_OF_NUCLEOTIDE_DI_AND_TRIPHOSPHATES	19	15	0.679	0.905	0.358	0.652	0.791	0.844	0.757
REACTOME_SIGNALING_BY_HIPPO	22	18	0.407	0.652	0.69	0.841	0.793	0.74	0.715																	0.604	0.175
REACTOME_ACTIVATION_OF_CHAPERONES_BY_ATF6_ALPHA	13	6	0.719	0.795	0.931	0.924	0.794	0.814	0.779
KEGG_PROTEIN_EXPORT	24	19	0.742	0.703	0.372	0.373	0.795	0.852	0.842
BIOCARTA_EGF_PATHWAY	31	24	0.264	0.141	0.0318	0.22	0.796	0.712	0.414	0.782	1	0.488	1					0.818	1	0.544	1					0.342	0.215
REACTOME_THROMBIN_SIGNALLING_THROUGH_PROTEINASE_ACTIVATED_RECEPTORS_PARS	32	23	0.415	0.264	0.17	0.232	0.797	0.802	0.689																	0.694
BIOCARTA_PITX2_PATHWAY	15	9	0.57	0.71	0.335	0.193	0.798	0.768	0.842	0.121	1	0.0466	1					0.156	1	0.0616	1					0.082
REACTOME_NCAM_SIGNALING_FOR_NEURITE_OUT_GROWTH	64	55	0.125	0.491	0.263	0.188	0.799	0.697	0.708	0.608	1	0.307	1					0.766	1	0.483	1					0.157
REACTOME_CDT1_ASSOCIATION_WITH_THE_CDC6_ORC_ORIGIN_COMPLEX	56	35	0.531	0.397	0.573	0.58	0.799	0.862	0.626									0.636	1							0.522
KEGG_HOMOLOGOUS_RECOMBINATION	28	24	0.84	0.522	0.845	0.703	0.8	0.822	0.746									0.57	1	0.324	1					0.7
BIOCARTA_ERK_PATHWAY	28	20	0.233	0.0538	0.00019	0.0802	0.801	0.718	0.186	0.0974	1	0.0834	1					0.135	1	0.126	1	0.0445	1			0.067	0.171
REACTOME_M_G1_TRANSITION	81	52	0.417	0.0995	0.116	0.251	0.801	0.862	0.394									0.841	1							0.763
REACTOME_SIGNAL_AMPLIFICATION	31	24	0.598	0.311	0.19	0.337	0.801	0.813	0.66																	0.698
BIOCARTA_HIVNEF_PATHWAY	58	43	0.377	0.44	0.578	0.354	0.802	0.782	0.546	0.758	1	0.454	1					0.911	1	0.716	1					0.625
REACTOME_CROSS_PRESENTATION_OF_SOLUBLE_EXOGENOUS_ANTIGENS_ENDOSOMES	48	29	0.462	0.373	0.488	0.586	0.802	0.849	0.903									0.531	1							0.438
REACTOME_NUCLEAR_EVENTS_KINASE_AND_TRANSCRIPTION_FACTOR_ACTIVATION	24	18	0.523	0.929	0.62	0.578	0.802	0.773	0.942																	0.6
REACTOME_DCC_MEDIATED_ATTRACTIVE_SIGNALING	13	13	0.32	0.444	0.327	0.327	0.802	0.566	0.478
BIOCARTA_HCMV_PATHWAY	17	14	0.454	0.854	0.955	0.688	0.803	0.76	0.986
ST_ERK1_ERK2_MAPK_PATHWAY	32	25	0.185	0.424	0.288	0.341	0.804	0.75	0.839	0.74	1	0.435	1					0.514	1	0.225	1					0.725
PID_FCER1PATHWAY	62	46	0.185	0.255	0.347	0.113	0.804	0.729	0.339	0.62	1	0.459	1					0.786	1	0.634	1					0.164	0.362
KEGG_PURINE_METABOLISM	159	120	0.0466	0.138	0.181	0.199	0.805	0.68	0.636	0.831	1	0.528	1					0.721	1	0.43	1					0.56	0.688
KEGG_CIRCADIAN_RHYTHM_MAMMAL	13	9	0.538	0.611	0.393	0.669	0.805	0.765	0.683	0.154	1							0.0736	1
REACTOME_APOPTOTIC_CLEAVAGE_OF_CELL_ADHESION_PROTEINS	12	10	0.504	0.641	0.65	0.641	0.805	0.762	0.907																	0.418
REACTOME_DIABETES_PATHWAYS	133	92	0.411	0.743	0.384	0.753	0.805	0.851	0.872	0.947	1							0.738	1	0.971	1					0.954
KEGG_TOLL_LIKE_RECEPTOR_SIGNALING_PATHWAY	102	62	0.261	0.237	0.358	0.112	0.807	0.856	0.424	0.802	1							0.527	1	0.57	1	0.217	1			0.821	0.46
REACTOME_SMOOTH_MUSCLE_CONTRACTION	25	21	0.393	0.565	0.455	0.546	0.808	0.784	0.819									0.67	1	0.389	1					0.666
KEGG_BASE_EXCISION_REPAIR	35	23	0.524	0.527	0.212	0.368	0.809	0.844	0.645
REACTOME_SIGNALING_BY_FGFR_IN_DISEASE	127	102	0.00293	0.0676	0.0126	0.0256	0.811	0.747	0.652	0.765	1	0.397	1					0.816	1	0.592	1					0.413	0.651
ST_MYOCYTE_AD_PATHWAY	27	22	0.198	0.222	0.0799	0.115	0.812	0.764	0.907	0.405	1	0.417	1					0.513	1	0.489	1					0.298	0.212
PID_IL2_1PATHWAY	55	40	0.378	0.552	0.018	0.0846	0.812	0.738	0.733	0.803	1	0.734	1					0.751	1	0.597	1					0.628	0.31
REACTOME_METABOLISM_OF_AMINO_ACIDS_AND_DERIVATIVES	200	145	0.0294	0.106	0.313	0.118	0.812	0.856	0.668	0.142	1	0.164	1					0.271	1	0.417	1	0.674	1			0.101
REACTOME_APOPTOSIS	148	98	0.127	0.434	0.0648	0.556	0.813	0.795	0.918	0.566	1	0.239	1					0.754	1	0.525	1					0.208	0.621
BIOCARTA_CCR5_PATHWAY	20	11	0.558	0.805	0.73	0.742	0.814	0.774	0.883
REACTOME_ACTIVATION_OF_NF_KAPPAB_IN_B_CELLS	64	40	0.38	0.517	0.495	0.759	0.814	0.84	0.82									0.611	1							0.628
REACTOME_ACTIVATION_OF_IRF3_IRF7_MEDIATED_BY_TBK1_IKK_EPSILON	14	8	0.515	0.401	0.648	0.712	0.814	0.867	0.688
KEGG_MATURITY_ONSET_DIABETES_OF_THE_YOUNG	25	14	0.423	0.277	0.379	0.316	0.815	0.86	0.637
PID_HDAC_CLASSIII_PATHWAY	25	17	0.114	0.0144	0.0848	0.0429	0.815	0.794	0.0362	0.353	1							0.467	1							0.193
REACTOME_LYSOSOME_VESICLE_BIOGENESIS	23	16	0.483	0.355	0.305	0.108	0.815	0.796	0.611																	0.542
BIOCARTA_CELL2CELL_PATHWAY	14	14	0.338	0.101	0.204	0.233	0.816	0.693	0.205	0.893	1							0.872	1
ST_ADRENERGIC	36	29	0.164	0.562	0.234	0.378	0.816	0.758	0.97	0.641	1	0.584	1					0.502	1	0.661	1					0.426	0.261
REACTOME_PHOSPHOLIPASE_C_MEDIATED_CASCADE	54	45	0.0327	0.0996	0.0484	0.121	0.817	0.766	0.563	0.918	1	0.614	1					0.955	1	0.715	1					0.64
PID_CD40_PATHWAY	31	24	0.473	0.523	0.66	0.615	0.818	0.829	0.946
BIOCARTA_RNA_PATHWAY	10	8	0.719	0.727	0.898	0.86	0.819	0.83	0.872
KEGG_PROTEASOME	48	28	0.667	0.553	0.554	0.605	0.822	0.865	0.839									0.572	1							0.428
PID_S1P_META_PATHWAY	21	15	0.364	0.575	0.349	0.209	0.822	0.81	0.649																	0.548
KEGG_BUTANOATE_METABOLISM	34	30	0.615	0.9	0.597	0.613	0.825	0.857	0.947									0.598	1							0.797
REACTOME_RETROGRADE_NEUROTROPHIN_SIGNALLING	13	11	0.597	0.74	0.331	0.269	0.825	0.765	0.846
BIOCARTA_ETC_PATHWAY	12	7	0.81	0.879	0.884	0.874	0.826	0.828	0.974																	0.303
BIOCARTA_HSP27_PATHWAY	15	9	0.368	0.532	0.584	0.567	0.826	0.815	0.901
REACTOME_ADENYLATE_CYCLASE_INHIBITORY_PATHWAY	13	12	0.202	0.0458	0.0146	0.0533	0.826	0.758	0.269	0.194	1	0.0568	1					0.259	1	0.0648	1					0.107
KEGG_RIBOFLAVIN_METABOLISM	16	12	0.765	0.915	0.899	0.888	0.827	0.84	0.918
BIOCARTA_EDG1_PATHWAY	27	19	0.331	0.254	0.264	0.421	0.827	0.694	0.668																	0.628
KEGG_LEISHMANIA_INFECTION	72	47	0.145	0.184	0.00948	0.00713	0.828	0.86	0.857	0.033	0.999	0.0542	1	0.0008	0.265			0.102	1	0.0905	1	0.0071	0.859	0.0226	0.943	0.197	0.012
PID_UPA_UPAR_PATHWAY	42	30	0.356	0.651	0.557	0.715	0.828	0.797	0.898
REACTOME_BMAL1_CLOCK_NPAS2_ACTIVATES_CIRCADIAN_EXPRESSION	36	26	0.22	0.16	0.156	0.131	0.828	0.739	0.336	0.111	1	0.526	1					0.0872	1	0.342	1	0.121	1			0.383	0.246
BIOCARTA_FIBRINOLYSIS_PATHWAY	12	9	0.563	0.904	0.826	0.804	0.829	0.82	0.96
BIOCARTA_IL7_PATHWAY	17	16	0.176	0.343	0.0439	0.0401	0.829	0.793	0.764	0.435	1							0.491	1							0.545
BIOCARTA_ERYTH_PATHWAY	15	8	0.416	0.264	0.359	0.445	0.83	0.824	0.464									0.198	1	0.083	1	0.0099	0.931
REACTOME_INHIBITION_OF_INSULIN_SECRETION_BY_ADRENALINE_NORADRENALINE	25	17	0.405	0.206	0.797	0.749	0.832	0.812	0.616
KEGG_CALCIUM_SIGNALING_PATHWAY	178	143	0.00775	0.00098	0.00068	0.00241	0.833	0.619	0.105	0.186	1	0.177	1	0.891	1			0.375	1	0.327	1	0.755	1			0.062	0.418
REACTOME_AUTODEGRADATION_OF_CDH1_BY_CDH1_APC_C	64	35	0.42	0.434	0.104	0.39	0.833	0.892	0.946	0.0644	1	0.102	1					0.162	1	0.382	1					0.099
REACTOME_AMINE_LIGAND_BINDING_RECEPTORS	38	25	0.553	0.323	0.453	0.601	0.834	0.833	0.366	0.304	1	0.314	1					0.529	1	0.52	1					0.111
BIOCARTA_EGFR_SMRTE_PATHWAY	11	10	0.369	0.666	0.704	0.802	0.836	0.728	0.924
REACTOME_DEADENYLATION_DEPENDENT_MRNA_DECAY	48	32	0.186	0.86	0.912	0.78	0.837	0.891	0.998
REACTOME_DIGESTION_OF_DIETARY_CARBOHYDRATE	12	5	0.306	0.661	0.625	0.735	0.838	0.833	0.769
KEGG_PATHWAYS_IN_CANCER	328	261	0.00417	0.0782	0.115	0.0874	0.839	0.697	0.507	0.988	1	0.886	1	0.827	1	0.304	0.992	0.994	1	0.851	1	0.91	1	0.409	1	0.437	0.484
REACTOME_SCF_BETA_TRCP_MEDIATED_DEGRADATION_OF_EMI1	51	33	0.513	0.527	0.555	0.623	0.839	0.878	0.936									0.623	1							0.524
BIOCARTA_TFF_PATHWAY	21	15	0.38	0.356	0.406	0.354	0.84	0.795	0.678																	0.51
REACTOME_SIGNALING_BY_ERBB2	101	80	0.00677	0.0123	0.00315	0.011	0.841	0.722	0.373	0.742	1	0.531	1					0.702	1	0.444	1					0.757
KEGG_OOCYTE_MEIOSIS	114	87	0.0915	0.123	0.00156	0.0219	0.842	0.814	0.606	0.537	1	0.391	1	0.319	1			0.594	1	0.6	1	0.452	1			0.118	0.192
KEGG_ENDOCYTOSIS	183	143	0.0034	0.0984	0.115	0.0895	0.842	0.776	0.488	0.916	1	0.81	1					0.849	1	0.596	1	0.486	1			0.588
REACTOME_INTERACTION_BETWEEN_L1_AND_ANKYRINS	23	18	0.487	0.775	0.865	0.856	0.842	0.723	0.74
PID_ARF6_PATHWAY	35	26	0.402	0.326	0.0877	0.337	0.844	0.799	0.398	0.763	1							0.819	1							0.715
REACTOME_HOMOLOGOUS_RECOMBINATION_REPAIR_OF_REPLICATION_INDEPENDENT_DOUBLE_STRAND_BREAKS	17	15	0.824	0.417	0.362	0.412	0.844	0.802	0.613
REACTOME_GLUCAGON_TYPE_LIGAND_RECEPTORS	33	22	0.476	0.165	0.353	0.338	0.845	0.863	0.562																	0.689
BIOCARTA_PPARA_PATHWAY	58	37	0.211	0.513	0.344	0.226	0.846	0.8	0.764	0.844	1	0.56	1					0.768	1	0.439	1	0.15	1			0.551	0.308
KEGG_CITRATE_CYCLE_TCA_CYCLE	32	25	0.399	0.634	0.45	0.666	0.847	0.849	0.769
REACTOME_PROCESSING_OF_INTRONLESS_PRE_MRNAS	14	10	0.692	0.872	0.483	0.696	0.847	0.881	0.799
REACTOME_EGFR_DOWNREGULATION	25	21	0.41	0.196	0.0773	0.121	0.849	0.813	0.462																	0.668
REACTOME_FACILITATIVE_NA_INDEPENDENT_GLUCOSE_TRANSPORTERS	12	10	0.608	0.356	0.484	0.594	0.849	0.853	0.62
BIOCARTA_TNFR2_PATHWAY	18	12	0.458	0.558	0.696	0.409	0.85	0.813	0.683
KEGG_FC_GAMMA_R_MEDIATED_PHAGOCYTOSIS	97	78	0.0742	0.19	0.168	0.0749	0.852	0.751	0.529	0.755	1	0.712	1					0.725	1	0.444	1					0.369
KEGG_LEUKOCYTE_TRANSENDOTHELIAL_MIGRATION	118	88	0.418	0.293	0.131	0.124	0.852	0.805	0.57	0.962	1	0.987	1					0.986	1	0.974	1					0.989
REACTOME_NGF_SIGNALLING_VIA_TRKA_FROM_THE_PLASMA_MEMBRANE	137	110	0.00937	0.342	0.0181	0.0422	0.852	0.746	0.895	0.934	1	0.792	1					0.938	1	0.882	1					0.677	0.694
SIG_PIP3_SIGNALING_IN_B_LYMPHOCYTES	36	34	0.253	0.104	0.112	0.0497	0.854	0.803	0.644	0.367	1	0.733	1					0.378	1	0.745	1					0.255
REACTOME_GASTRIN_CREB_SIGNALLING_PATHWAY_VIA_PKC_AND_MAPK	205	151	0.00528	0.000217	0.0056	0.0463	0.855	0.816	0.172	0.955	1	0.823	1	0.721	1			0.985	1	0.948	1	0.846	1			0.643	0.442
REACTOME_DEADENYLATION_OF_MRNA	22	15	0.19	0.869	0.761	0.694	0.855	0.882	0.998
REACTOME_P75NTR_RECRUITS_SIGNALLING_COMPLEXES	12	9	0.872	0.836	0.953	0.972	0.856	0.879	0.67
REACTOME_P75NTR_SIGNALS_VIA_NFKB	14	9	0.872	0.836	0.953	0.972	0.856	0.879	0.67
KEGG_ADHERENS_JUNCTION	75	65	0.192	0.285	0.342	0.366	0.857	0.656	0.404	0.981	1	0.955	1					0.91	1	0.907	1					0.857
PID_TXA2PATHWAY	57	46	0.246	0.00478	0.0206	0.0298	0.858	0.752	0.125	0.925	1	0.94	1					0.713	1	0.843	1					0.667
REACTOME_NRIF_SIGNALS_CELL_DEATH_FROM_THE_NUCLEUS	15	11	0.858	0.836	0.916	0.974	0.858	0.881	0.861
BIOCARTA_NFAT_PATHWAY	56	40	0.305	0.661	0.332	0.243	0.859	0.836	0.882	0.531	1	0.208	1					0.738	1	0.408	1					0.311	0.322
BIOCARTA_IL1R_PATHWAY	33	23	0.33	0.509	0.473	0.274	0.859	0.834	0.858
REACTOME_CELL_CYCLE_CHECKPOINTS	124	83	0.506	0.575	0.0926	0.274	0.859	0.918	0.801	0.375	1	0.27	1					0.597	1	0.629	1					0.406
PID_ECADHERIN_STABILIZATION_PATHWAY	42	35	0.321	0.582	0.177	0.106	0.86	0.779	0.747	0.848	1	0.482	1					0.891	1	0.564	1					0.527
REACTOME_G_PROTEIN_BETA_GAMMA_SIGNALLING	28	20	0.412	0.0332	0.352	0.243	0.861	0.85	0.224																	0.277
REACTOME_ADENYLATE_CYCLASE_ACTIVATING_PATHWAY	10	9	0.139	0.0167	0.0129	0.0453	0.862	0.785	0.165	0.163	1	0.0446	1					0.188	1	0.0509	1					0.065
PID_AMB2_NEUTROPHILS_PATHWAY	41	29	0.525	0.72	0.203	0.226	0.864	0.854	0.953									0.127	1	0.073	1	0.0756	1
REACTOME_PROCESSING_OF_CAPPED_INTRONLESS_PRE_MRNA	23	16	0.784	0.951	0.757	0.92	0.864	0.913	0.928
REACTOME_IRON_UPTAKE_AND_TRANSPORT	36	30	0.508	0.746	0.39	0.064	0.864	0.861	0.751	0.435	1							0.617	1							0.443	0.264
REACTOME_HIGHLY_CALCIUM_PERMEABLE_POSTSYNAPTIC_NICOTINIC_ACETYLCHOLINE_RECEPTORS	13	9	0.88	0.898	0.954	0.939	0.865	0.891	0.814
BIOCARTA_TALL1_PATHWAY	15	10	0.783	0.797	0.941	0.806	0.867	0.865	0.647
REACTOME_FORMATION_OF_THE_HIV1_EARLY_ELONGATION_COMPLEX	34	19	0.473	0.603	0.142	0.201	0.868	0.847	0.669									0.435	1							0.604
REACTOME_CYTOSOLIC_SULFONATION_OF_SMALL_MOLECULES	14	9	0.768	0.574	0.183	0.0784	0.868	0.875	0.664
BIOCARTA_ALK_PATHWAY	37	29	0.435	0.398	0.303	0.409	0.869	0.856	0.648									0.551	1
REACTOME_NFKB_IS_ACTIVATED_AND_SIGNALS_SURVIVAL	11	6	0.869	0.714	0.879	0.934	0.869	0.879	0.585
REACTOME_BETA_DEFENSINS	42	14	0.751	0.71	0.854	0.654	0.87	0.932	0.871
PID_VEGFR1_PATHWAY	26	22	0.587	0.62	0.62	0.763	0.871	0.846	0.785
REACTOME_PLATELET_ACTIVATION_SIGNALING_AND_AGGREGATION	208	156	0.0403	0.038	0.00451	0.011	0.872	0.796	0.552	0.733	1	0.856	1	0.735	1			0.838	1	0.888	1	0.817	1			0.51	0.483
KEGG_NOTCH_SIGNALING_PATHWAY	47	31	0.404	0.423	0.23	0.255	0.873	0.85	0.646	0.444	1	0.171	1					0.356	1	0.108	1					0.195
BIOCARTA_INTEGRIN_PATHWAY	38	28	0.446	0.187	0.139	0.0573	0.873	0.831	0.457	0.717	1							0.827	1							0.774
PID_AR_NONGENOMIC_PATHWAY	31	26	0.231	0.0795	0.346	0.157	0.873	0.849	0.371																	0.728
REACTOME_SIGNALING_BY_GPCR	920	469	0.00018	0.00499	0.0444	0.037	0.873	0.883	0.557	0.631	1	0.46	1	0.922	1			0.932	1	0.885	1	0.921	1	0.869	1	0.416	0.867
BIOCARTA_P53HYPOXIA_PATHWAY	23	16	0.707	0.625	0.287	0.47	0.874	0.899	0.733
BIOCARTA_MEF2D_PATHWAY	23	17	0.56	0.282	0.226	0.258	0.874	0.735	0.568	0.724	1	0.697	1					0.725	1	0.682	1					0.586	0.151
REACTOME_RNA_POL_II_TRANSCRIPTION_PRE_INITIATION_AND_PROMOTER_OPENING	41	23	0.674	0.614	0.523	0.389	0.875	0.856	0.655									0.248	1	0.11	1					0.699
REACTOME_NEGATIVE_REGULATION_OF_THE_PI3K_AKT_NETWORK	9	7	0.801	0.648	0.52	0.552	0.877	0.877	0.576
KEGG_EPITHELIAL_CELL_SIGNALING_IN_HELICOBACTER_PYLORI_INFECTION	68	55	0.553	0.827	0.807	0.854	0.878	0.857	0.802																	0.948
REACTOME_SIGNALING_BY_ILS	107	83	0.0261	0.0546	1e-05	1e-05	0.878	0.821	0.611	0.166	1	0.148	1	0.235	1	0.021	0.83	0.039	1	0.0356	1	0.164	1	0.0082	0.775	0.228	0.199
KEGG_DILATED_CARDIOMYOPATHY	92	74	0.0128	0.0138	0.0351	0.0743	0.879	0.714	0.781	0.266	1	0.493	1					0.253	1	0.258	1	0.636	1			0.313	0.525
PID_BARD1PATHWAY	29	27	0.424	0.341	0.0691	0.164	0.879	0.857	0.674	0.146	1	0.175	1					0.232	1	0.285	1					0.148	0.226
BIOCARTA_41BB_PATHWAY	17	12	0.771	0.931	0.799	0.776	0.88	0.856	0.812
PID_SYNDECAN_2_PATHWAY	33	26	0.462	0.381	0.19	0.0674	0.881	0.87	0.837									0.453	1	0.452	1
REACTOME_ANTIVIRAL_MECHANISM_BY_IFN_STIMULATED_GENES	66	49	0.339	0.679	0.471	0.672	0.881	0.873	0.774																	0.918
REACTOME_THROMBOXANE_SIGNALLING_THROUGH_TP_RECEPTOR	23	16	0.586	0.0521	0.0545	0.0759	0.881	0.882	0.255																	0.551
PID_LYSOPHOSPHOLIPID_PATHWAY	66	53	0.0306	0.0289	0.00057	0.0193	0.882	0.787	0.54	0.827	1	0.37	1					0.89	1	0.447	1					0.281	0.417
KEGG_PPAR_SIGNALING_PATHWAY	69	54	0.489	0.621	0.319	0.344	0.884	0.912	0.702	0.402	1							0.59	1	0.659	1	0.234	1			0.262	0.421
KEGG_PROPANOATE_METABOLISM	33	28	0.354	0.696	0.733	0.776	0.885	0.875	0.872
KEGG_SPLICEOSOME	128	87	0.539	0.783	0.726	0.752	0.886	0.945	0.95	0.636	1							0.911	1	0.865	1					0.806
REACTOME_FORMATION_OF_TUBULIN_FOLDING_INTERMEDIATES_BY_CCT_TRIC	22	10	0.729	0.606	0.489	0.527	0.886	0.911	0.273
BIOCARTA_STRESS_PATHWAY	25	15	0.573	0.856	0.917	0.741	0.887	0.858	0.864
PID_S1P_S1P3_PATHWAY	29	24	0.477	0.408	0.146	0.15	0.887	0.877	0.629																	0.722
REACTOME_SLBP_DEPENDENT_PROCESSING_OF_REPLICATION_DEPENDENT_HISTONE_PRE_MRNAS	11	8	0.919	0.973	0.981	0.984	0.887	0.929	0.967
BIOCARTA_NFKB_PATHWAY	23	15	0.627	0.672	0.744	0.587	0.89	0.886	0.809
REACTOME_MRNA_CAPPING	30	17	0.552	0.689	0.194	0.0204	0.89	0.853	0.764	0.228	1	0.0878	1					0.431	1	0.244	1					0.213
KEGG_PROGESTERONE_MEDIATED_OOCYTE_MATURATION	86	68	0.177	0.319	0.0603	0.147	0.892	0.886	0.874	0.77	1	0.814	1					0.882	1	0.897	1					0.675
BIOCARTA_PYK2_PATHWAY	31	23	0.545	0.489	0.344	0.408	0.892	0.847	0.733																	0.685
REACTOME_REGULATION_OF_MRNA_STABILITY_BY_PROTEINS_THAT_BIND_AU_RICH_ELEMENTS	84	51	0.471	0.62	0.672	0.576	0.892	0.932	0.964									0.722	1							0.703
REACTOME_SIGNALING_BY_FGFR	112	88	0.0174	0.133	0.0832	0.0836	0.892	0.854	0.704	0.889	1	0.673	1					0.908	1	0.823	1					0.643
BIOCARTA_PROTEASOME_PATHWAY	28	19	0.865	0.848	0.151	0.875	0.893	0.923	0.941																	0.609
REACTOME_CIRCADIAN_REPRESSION_OF_EXPRESSION_BY_REV_ERBA	23	19	0.322	0.294	0.231	0.229	0.894	0.809	0.497	0.198	1	0.457	1					0.0882	1	0.201	1	0.0778	1			0.25	0.157
KEGG_GLYOXYLATE_AND_DICARBOXYLATE_METABOLISM	16	12	0.463	0.528	0.263	0.187	0.895	0.883	0.8	0.164	1	0.066	1					0.253	1	0.133	1					0.456
BIOCARTA_AKAP95_PATHWAY	12	9	0.38	0.783	0.809	0.657	0.896	0.888	0.642																	0.366
REACTOME_OPIOID_SIGNALLING	78	62	0.0167	0.0391	0.065	0.0596	0.896	0.792	0.47	0.801	1	0.453	1					0.75	1	0.521	1					0.207
REACTOME_INSULIN_SYNTHESIS_AND_PROCESSING	21	16	0.534	0.716	0.116	0.469	0.896	0.834	0.831
REACTOME_LIPID_DIGESTION_MOBILIZATION_AND_TRANSPORT	46	32	0.544	0.604	0.15	0.0477	0.896	0.915	0.732	0.388	1	0.132	1					0.341	1	0.295	1					0.796
REACTOME_TRAF6_MEDIATED_IRF7_ACTIVATION_IN_TLR7_8_OR_9_SIGNALING	10	5	0.864	0.577	0.576	0.571	0.897	0.89	0.491
REACTOME_RNA_POL_I_TRANSCRIPTION_INITIATION	25	17	0.411	0.167	0.352	0.375	0.897	0.876	0.221
REACTOME_G_ALPHA_S_SIGNALLING_EVENTS	121	81	0.0974	0.0931	0.165	0.15	0.898	0.864	0.588	0.797	1	0.441	1					0.79	1	0.499	1					0.388
REACTOME_NEGATIVE_REGULATORS_OF_RIG_I_MDA5_SIGNALING	31	21	0.551	0.255	1e-05	0.0283	0.898	0.921	0.797	0.175	1	0.0626	1	0.0038	0.682			0.407	1	0.204	1	0.0212	0.995			0.3	0.023
REACTOME_PI3K_AKT_ACTIVATION	38	29	0.398	0.649	0.71	0.319	0.9	0.891	0.917
REACTOME_CIRCADIAN_CLOCK	53	39	0.262	0.181	0.182	0.153	0.9	0.864	0.49	0.228	1	0.632	1					0.197	1	0.474	1	0.17	1			0.603	0.326
REACTOME_P130CAS_LINKAGE_TO_MAPK_SIGNALING_FOR_INTEGRINS	15	13	0.555	0.589	0.113	0.167	0.901	0.87	0.835																	0.488	0.135
REACTOME_G_PROTEIN_ACTIVATION	27	19	0.348	0.0463	0.224	0.105	0.901	0.904	0.317	0.429	1							0.546	1							0.658
REACTOME_GPCR_DOWNSTREAM_SIGNALING	805	397	0.000801	0.00204	0.0214	0.0195	0.901	0.917	0.428	0.53	1	0.366	1	0.93	1			0.926	1	0.868	1	0.961	1	0.807	1	0.431	0.922
KEGG_NITROGEN_METABOLISM	23	19	0.473	0.577	0.362	0.115	0.902	0.915	0.949																	0.618	0.17
BIOCARTA_CD40_PATHWAY	15	11	0.681	0.404	0.734	0.272	0.902	0.885	0.532
REACTOME_IRAK1_RECRUITS_IKK_COMPLEX	10	6	0.734	0.403	0.626	0.653	0.903	0.871	0.145
REACTOME_INNATE_IMMUNE_SYSTEM	279	172	0.0392	0.15	1e-05	1e-05	0.903	0.933	0.856	0.187	1	0.0702	1	0.001	0.306	0.0042	0.493	0.397	1	0.33	1	0.104	1	0.184	0.999	0.041	0.006
BIOCARTA_WNT_PATHWAY	26	19	0.711	0.603	0.709	0.661	0.905	0.874	0.652									0.446	1							0.632
KEGG_CYTOSOLIC_DNA_SENSING_PATHWAY	56	24	0.572	0.584	0.878	0.681	0.906	0.925	0.771																	0.715
BIOCARTA_CK1_PATHWAY	17	10	0.4	0.548	0.356	0.483	0.906	0.822	0.427
REACTOME_RECRUITMENT_OF_NUMA_TO_MITOTIC_CENTROSOMES	10	8	0.688	0.546	0.337	0.572	0.906	0.905	0.468																	0.34
REACTOME_YAP1_AND_WWTR1_TAZ_STIMULATED_GENE_EXPRESSION	24	20	0.308	0.397	0.441	0.505	0.907	0.87	0.779	0.647	1	0.351	1					0.426	1	0.147	1	0.0666	1			0.246	0.162
REACTOME_GAB1_SIGNALOSOME	38	31	0.364	0.302	0.216	0.146	0.908	0.891	0.677	0.665	1							0.722	1							0.819
REACTOME_FATTY_ACID_TRIACYLGLYCEROL_AND_KETONE_BODY_METABOLISM	168	133	0.0446	0.106	0.145	0.0237	0.908	0.862	0.532	0.571	1	0.969	1	0.547	1			0.396	1	0.466	1	0.456	1			0.224	0.388
REACTOME_APC_CDC20_MEDIATED_DEGRADATION_OF_NEK2A	28	15	0.792	0.825	0.0436	0.397	0.908	0.948	0.947	0.0386	1							0.203	1							0.187
KEGG_CHRONIC_MYELOID_LEUKEMIA	73	60	0.319	0.39	0.534	0.41	0.909	0.869	0.546	0.963	1							0.975	1							0.831
REACTOME_MITOCHONDRIAL_FATTY_ACID_BETA_OXIDATION	14	10	0.774	0.738	0.7	0.746	0.91	0.914	0.678
PID_EPHA_FWDPATHWAY	34	28	0.481	0.113	0.024	0.00576	0.911	0.857	0.479	0.485	1	0.358	1					0.344	1	0.159	1					0.419
REACTOME_TRAFFICKING_AND_PROCESSING_OF_ENDOSOMAL_TLR	14	9	0.673	0.59	0.579	0.453	0.912	0.943	0.9
REACTOME_SIGNALING_BY_THE_B_CELL_RECEPTOR_BCR	126	90	0.122	0.305	0.172	0.0867	0.912	0.9	0.911	0.657	1	0.549	1					0.578	1	0.728	1					0.48
ST_GA13_PATHWAY	37	31	0.693	0.605	0.401	0.162	0.913	0.897	0.9
REACTOME_REGULATION_OF_APOPTOSIS	58	39	0.492	0.361	0.532	0.638	0.913	0.915	0.892	0.858	1							0.792	1							0.62
REACTOME_GRB2_SOS_PROVIDES_LINKAGE_TO_MAPK_SIGNALING_FOR_INTERGRINS_	15	13	0.646	0.4	0.0347	0.0365	0.913	0.874	0.547	0.406	1	0.181	1					0.454	1	0.228	1					0.143	0.119
REACTOME_DESTABILIZATION_OF_MRNA_BY_BRF1	17	11	0.747	0.586	0.471	0.631	0.913	0.943	0.685
REACTOME_REGULATION_OF_BETA_CELL_DEVELOPMENT	30	20	0.621	0.601	0.794	0.553	0.914	0.927	0.821
REACTOME_G_BETA_GAMMA_SIGNALLING_THROUGH_PI3KGAMMA	25	17	0.727	0.141	0.25	0.232	0.914	0.92	0.37																	0.601
REACTOME_RECEPTOR_LIGAND_BINDING_INITIATES_THE_SECOND_PROTEOLYTIC_CLEAVAGE_OF_NOTCH_RECEPTOR	12	7	0.49	0.75	0.289	0.252	0.914	0.905	0.937																	0.303
REACTOME_AUTODEGRADATION_OF_THE_E3_UBIQUITIN_LIGASE_COP1	51	31	0.708	0.403	0.703	0.736	0.915	0.936	0.871									0.583	1							0.447
BIOCARTA_ATM_PATHWAY	20	16	0.899	0.939	0.851	0.922	0.916	0.895	0.994
BIOCARTA_EPHA4_PATHWAY	10	8	0.65	0.798	0.626	0.599	0.917	0.846	0.921
KEGG_TERPENOID_BACKBONE_BIOSYNTHESIS	15	12	0.775	0.96	0.688	0.677	0.918	0.939	0.679
BIOCARTA_SPRY_PATHWAY	18	13	0.661	0.469	0.154	0.53	0.918	0.89	0.571																	0.486
BIOCARTA_CCR3_PATHWAY	23	18	0.51	0.0716	0.177	0.131	0.919	0.836	0.29	0.867	1							0.623	1	0.621	1					0.23
BIOCARTA_GSK3_PATHWAY	27	20	0.818	0.879	0.989	0.893	0.92	0.928	0.885
REACTOME_TRAF6_MEDIATED_INDUCTION_OF_NFKB_AND_MAP_KINASES_UPON_TLR7_8_OR_9_ACTIVATION	77	52	0.242	0.436	7e-05	0.00014	0.92	0.891	0.822	0.921	1	0.673	1	0.114	1	0.0078	0.655	0.589	1	0.611	1	0.219	1	0.0228	0.945	0.491	0.084
REACTOME_TRANSFERRIN_ENDOCYTOSIS_AND_RECYCLING	25	22	0.805	0.908	0.865	0.739	0.921	0.918	0.881
REACTOME_NETRIN1_SIGNALING	41	37	0.292	0.412	0.366	0.169	0.922	0.741	0.533	0.886	1	0.927	1					0.877	1	0.918	1					0.857
REACTOME_APC_C_CDH1_MEDIATED_DEGRADATION_OF_CDC20_AND_OTHER_APC_C_CDH1_TARGETED_PROTEINS_IN_LATE_MITOSIS_EARLY_G1	72	42	0.614	0.568	0.169	0.482	0.923	0.957	0.973	0.105	1	0.137	1					0.237	1	0.463	1					0.163
KEGG_SULFUR_METABOLISM	13	7	0.708	0.543	0.216	0.171	0.924	0.901	0.743
REACTOME_INSULIN_RECEPTOR_RECYCLING	23	20	0.839	0.918	0.923	0.89	0.924	0.917	0.874
REACTOME_RNA_POL_I_RNA_POL_III_AND_MITOCHONDRIAL_TRANSCRIPTION	122	45	0.277	0.154	0.279	0.273	0.924	0.942	0.661	0.627	1	0.336	1	0.04	0.999			0.661	1	0.616	1	0.221	1			0.187	0.075
REACTOME_SEROTONIN_RECEPTORS	12	11	0.828	0.632	0.352	0.443	0.925	0.925	0.627																	0.427
REACTOME_INHIBITION_OF_VOLTAGE_GATED_CA2_CHANNELS_VIA_GBETA_GAMMA_SUBUNITS	25	19	0.561	0.421	0.381	0.5	0.925	0.885	0.778
BIOCARTA_NO1_PATHWAY	33	25	0.436	0.767	0.461	0.243	0.926	0.887	0.882	0.887	1	0.633	1					0.915	1	0.683	1
REACTOME_DOWNSTREAM_SIGNALING_OF_ACTIVATED_FGFR	100	79	0.0438	0.128	0.0669	0.0746	0.926	0.892	0.676	0.862	1	0.634	1					0.944	1	0.78	1					0.761
REACTOME_REGULATION_OF_GENE_EXPRESSION_IN_BETA_CELLS	20	13	0.726	0.583	0.797	0.829	0.927	0.943	0.802
REACTOME_HORMONE_SENSITIVE_LIPASE_HSL_MEDIATED_TRIACYLGLYCEROL_HYDROLYSIS	13	8	0.822	0.917	0.794	0.664	0.927	0.929	0.901
PID_NOTCH_PATHWAY	59	47	0.306	0.605	0.364	0.431	0.928	0.903	0.85	0.952	1							0.973	1							0.927
REACTOME_LATENT_INFECTION_OF_HOMO_SAPIENS_WITH_MYCOBACTERIUM_TUBERCULOSIS	33	28	0.883	0.975	0.986	0.944	0.928	0.931	0.966
REACTOME_ADP_SIGNALLING_THROUGH_P2RY1	25	19	0.669	0.24	0.128	0.237	0.928	0.924	0.62																	0.641
REACTOME_DOUBLE_STRAND_BREAK_REPAIR	24	20	0.765	0.557	0.498	0.447	0.929	0.904	0.561
REACTOME_MYD88_MAL_CASCADE_INITIATED_ON_PLASMA_MEMBRANE	83	59	0.23	0.444	7e-05	0.00013	0.929	0.919	0.838	0.928	1	0.689	1	0.12	1	0.0086	0.689	0.649	1	0.653	1	0.25	1	0.028	0.96	0.607	0.125
KEGG_BASAL_TRANSCRIPTION_FACTORS	36	24	0.76	0.925	0.981	0.962	0.93	0.941	0.896									0.528	1	0.332	1
KEGG_FATTY_ACID_METABOLISM	42	35	0.781	0.825	0.294	0.661	0.931	0.952	0.904	0.437	1							0.663	1							0.524	0.305
KEGG_VALINE_LEUCINE_AND_ISOLEUCINE_DEGRADATION	44	38	0.576	0.895	0.413	0.428	0.933	0.919	0.944	0.784	1	0.487	1					0.885	1	0.665	1					0.557
PID_RANBP2PATHWAY	11	8	0.793	0.786	0.664	0.666	0.933	0.936	0.943
KEGG_BASAL_CELL_CARCINOMA	55	39	0.848	0.882	0.907	0.949	0.934	0.947	0.926	0.733	1	0.425	1					0.856	1	0.587	1					0.583	0.335
BIOCARTA_TOLL_PATHWAY	37	26	0.56	0.562	0.376	0.204	0.934	0.937	0.91									0.646	1
REACTOME_REGULATED_PROTEOLYSIS_OF_P75NTR	10	7	0.965	0.918	0.972	0.982	0.934	0.94	0.838
REACTOME_APC_C_CDC20_MEDIATED_DEGRADATION_OF_CYCLIN_B	26	13	0.843	0.897	0.0782	0.49	0.934	0.96	0.972	0.0368	1							0.171	1							0.126
REACTOME_APC_C_CDC20_MEDIATED_DEGRADATION_OF_MITOTIC_PROTEINS	73	44	0.702	0.68	0.227	0.569	0.935	0.967	0.98	0.115	1	0.149	1					0.262	1	0.478	1					0.194
REACTOME_TOLL_RECEPTOR_CASCADES	118	85	0.127	0.366	5e-05	0.00033	0.935	0.936	0.929	0.983	1	0.846	1	0.2	1	0.0142	0.783	0.892	1	0.86	1	0.417	1	0.0703	0.992	0.633	0.217
REACTOME_SIGNALING_BY_SCF_KIT	78	59	0.219	0.203	0.0184	0.00791	0.936	0.902	0.668	0.735	1	0.798	1					0.659	1	0.661	1					0.79	0.444
REACTOME_REGULATION_OF_MITOTIC_CELL_CYCLE	85	55	0.639	0.66	0.371	0.66	0.936	0.968	0.98	0.226	1	0.245	1					0.425	1	0.605	1					0.282
REACTOME_TRAF6_MEDIATED_NFKB_ACTIVATION	21	13	0.816	0.635	0.00229	0.028	0.936	0.93	0.33									0.381	1	0.156	1					0.491	0.119
KEGG_CARDIAC_MUSCLE_CONTRACTION	80	46	0.188	0.222	0.108	0.119	0.937	0.909	0.83	0.192	1	0.328	1					0.125	1	0.141	1	0.345	1			0.676
REACTOME_SIGNALING_BY_NOTCH4	12	7	0.798	0.926	0.674	0.457	0.937	0.932	0.898																	0.303
REACTOME_DOWNSTREAM_SIGNALING_EVENTS_OF_B_CELL_RECEPTOR_BCR	97	65	0.335	0.484	0.527	0.383	0.938	0.946	0.95	0.7	1	0.617	1					0.549	1	0.807	1					0.63
REACTOME_RORA_ACTIVATES_CIRCADIAN_EXPRESSION	24	21	0.411	0.334	0.236	0.244	0.939	0.891	0.586	0.21	1	0.466	1					0.0985	1	0.215	1	0.0853	1			0.279	0.188
REACTOME_P53_DEPENDENT_G1_DNA_DAMAGE_RESPONSE	57	35	0.771	0.499	0.76	0.836	0.94	0.958	0.893									0.643	1							0.541
ST_TYPE_I_INTERFERON_PATHWAY	9	6	0.942	0.856	0.817	0.683	0.941	0.941	0.738
REACTOME_SIGNALING_BY_PDGF	122	101	0.0219	0.151	0.00524	0.0092	0.941	0.897	0.737	0.708	1	0.409	1					0.845	1	0.57	1					0.24	0.633
REACTOME_FORMATION_OF_ATP_BY_CHEMIOSMOTIC_COUPLING	16	5	0.883	0.825	0.864	0.763	0.941	0.963	0.824
PID_LPA4_PATHWAY	15	12	0.221	0.0612	0.0167	0.112	0.942	0.882	0.53	0.399	1	0.147	1					0.443	1	0.156	1					0.121
PID_CXCR3PATHWAY	43	31	0.457	0.593	0.729	0.327	0.942	0.931	0.952
BIOCARTA_PLCE_PATHWAY	12	8	0.508	0.85	0.672	0.612	0.943	0.93	0.94																	0.339
BIOCARTA_TGFB_PATHWAY	19	17	0.602	0.258	0.242	0.177	0.944	0.922	0.59	0.39	1	0.176	1					0.204	1	0.252	1					0.209
BIOCARTA_VDR_PATHWAY	12	9	0.59	0.418	0.244	0.0569	0.945	0.922	0.527	0.18	1	0.0696	1					0.168	1	0.0684	1					0.059	0.09
REACTOME_TCA_CYCLE_AND_RESPIRATORY_ELECTRON_TRANSPORT	141	72	0.535	0.698	0.439	0.649	0.945	0.976	0.747																	0.886	0.531
BIOCARTA_VIP_PATHWAY	29	19	0.553	0.707	0.422	0.237	0.946	0.932	0.812									0.611	1	0.339	1	0.0458	1			0.618	0.151
REACTOME_DAG_AND_IP3_SIGNALING	32	27	0.0905	0.223	0.0523	0.179	0.946	0.895	0.814	0.958	1	0.774	1					0.969	1	0.814	1					0.737
BIOCARTA_PS1_PATHWAY	14	10	0.947	0.992	0.982	0.999	0.947	0.935	0.977
BIOCARTA_CBL_PATHWAY	13	12	0.771	0.44	0.243	0.599	0.948	0.9	0.646																	0.446
KEGG_GAP_JUNCTION	90	66	0.185	0.102	0.187	0.221	0.949	0.858	0.334	0.822	1	0.604	1					0.799	1	0.697	1					0.231
REACTOME_G_ALPHA_I_SIGNALLING_EVENTS	195	116	0.18	0.0987	0.056	0.259	0.949	0.959	0.613	0.492	1	0.428	1					0.837	1	0.805	1					0.344	0.67
REACTOME_ACTIVATED_TLR4_SIGNALLING	93	65	0.236	0.424	9e-05	0.00026	0.949	0.945	0.87	0.94	1	0.71	1	0.13	1	0.009	0.702	0.711	1	0.705	1	0.28	1	0.0339	0.969	0.628	0.134
REACTOME_AMINO_ACID_SYNTHESIS_AND_INTERCONVERSION_TRANSAMINATION	17	13	0.945	0.871	0.749	0.738	0.95	0.958	0.934																	0.508
BIOCARTA_AGPCR_PATHWAY	13	10	0.528	0.643	0.531	0.522	0.952	0.911	0.699																	0.413
ST_GAQ_PATHWAY	28	22	0.578	0.795	0.381	0.294	0.952	0.941	0.995	0.678	1							0.734	1							0.644	0.197
REACTOME_MRNA_SPLICING_MINOR_PATHWAY	45	23	0.76	0.831	0.398	0.512	0.952	0.965	0.983																	0.7
REACTOME_PHOSPHORYLATION_OF_THE_APC_C	23	12	0.758	0.862	0.0766	0.485	0.952	0.968	0.985	0.0376	1							0.162	1							0.113
BIOCARTA_DREAM_PATHWAY	14	9	0.333	0.591	0.00768	0.0659	0.953	0.942	0.99																	0.365	0.076
REACTOME_ZINC_TRANSPORTERS	15	10	0.914	0.812	0.794	0.851	0.953	0.963	0.953
KEGG_ALZHEIMERS_DISEASE	169	94	0.48	0.815	0.00267	0.183	0.954	0.928	0.959	0.68	1	0.598	1	0.524	1			0.844	1	0.721	1	0.185	1			0.346	0.238
REACTOME_SIGNALING_BY_NOTCH2	12	7	0.928	0.786	0.564	0.887	0.955	0.952	0.873
REACTOME_GABA_B_RECEPTOR_ACTIVATION	38	31	0.344	0.11	0.0467	0.128	0.955	0.913	0.598	0.592	1	0.447	1					0.715	1	0.53	1					0.469
REACTOME_EFFECTS_OF_PIP2_HYDROLYSIS	25	22	0.502	0.355	0.663	0.706	0.956	0.892	0.732	0.966	1							0.966	1
REACTOME_PIP3_ACTIVATES_AKT_SIGNALING	29	22	0.533	0.608	0.694	0.214	0.956	0.955	0.911
BIOCARTA_FREE_PATHWAY	10	7	0.93	0.97	0.977	0.874	0.958	0.968	0.984
ST_GA12_PATHWAY	23	18	0.776	0.82	0.675	0.619	0.958	0.958	0.934
REACTOME_REGULATION_OF_IFNA_SIGNALING	24	8	0.981	0.996	0.975	0.976	0.959	0.961	0.99
REACTOME_INHIBITION_OF_THE_PROTEOLYTIC_ACTIVITY_OF_APC_C_REQUIRED_FOR_THE_ONSET_OF_ANAPHASE_BY_MITOTIC_SPINDLE_CHECKPOINT_COMPONENTS	24	13	0.891	0.893	0.0464	0.426	0.961	0.978	0.977	0.0314	0.999							0.173	1							0.125
REACTOME_TGF_BETA_RECEPTOR_SIGNALING_ACTIVATES_SMADS	26	19	0.542	0.506	0.746	0.811	0.961	0.959	0.863									0.154	1
REACTOME_CA_DEPENDENT_EVENTS	30	25	0.178	0.436	0.07	0.162	0.961	0.933	0.924	0.869	1	0.603	1					0.905	1	0.652	1					0.747
REACTOME_ROLE_OF_DCC_IN_REGULATING_APOPTOSIS	10	9	0.707	0.568	0.521	0.66	0.961	0.929	0.772
BIOCARTA_CFTR_PATHWAY	12	8	0.679	0.81	0.761	0.579	0.963	0.95	0.864																	0.374
KEGG_P53_SIGNALING_PATHWAY	69	52	0.741	0.641	0.4	0.48	0.964	0.974	0.744	0.639	1							0.706	1	0.665	1					0.74
KEGG_MELANOGENESIS	102	75	0.292	0.157	0.175	0.118	0.964	0.95	0.726	0.129	1	0.0154	0.99	0.339	1			0.2	1	0.0197	0.997	0.416	1			0.013	0.183
REACTOME_DOWNSTREAM_SIGNAL_TRANSDUCTION	95	76	0.0579	0.191	0.00752	0.0327	0.964	0.938	0.872	0.759	1	0.447	1					0.861	1	0.579	1					0.518	0.514
REACTOME_GABA_RECEPTOR_ACTIVATION	52	44	0.235	0.0314	0.00477	0.0143	0.964	0.911	0.343	0.351	1	0.27	1	0.267	1			0.466	1	0.337	1	0.296	1			0.063	0.359
KEGG_PROSTATE_CANCER	89	69	0.453	0.492	0.658	0.533	0.966	0.945	0.778	0.856	1	0.672	1					0.822	1	0.605	1					0.675
BIOCARTA_AT1R_PATHWAY	36	27	0.749	0.538	0.532	0.662	0.966	0.93	0.679																	0.754
BIOCARTA_CDMAC_PATHWAY	16	7	0.759	0.809	0.707	0.752	0.966	0.894	0.892
REACTOME_RNA_POL_III_TRANSCRIPTION	33	20	0.644	0.608	0.47	0.489	0.966	0.975	0.983									0.455	1							0.084	0.196
REACTOME_REGULATION_OF_INSULIN_SECRETION	93	67	0.192	0.213	0.636	0.577	0.966	0.944	0.833	0.993	1							0.996	1							0.232
REACTOME_INWARDLY_RECTIFYING_K_CHANNELS	31	23	0.701	0.534	0.391	0.438	0.966	0.944	0.852
BIOCARTA_MCALPAIN_PATHWAY	25	17	0.609	0.618	0.771	0.87	0.967	0.951	0.881
KEGG_RNA_POLYMERASE	29	14	0.817	0.729	0.384	0.552	0.968	0.963	0.965									0.324	1							0.503
REACTOME_DOWNREGULATION_OF_TGF_BETA_RECEPTOR_SIGNALING	23	16	0.549	0.429	0.77	0.811	0.968	0.965	0.825									0.115	1
REACTOME_PPARA_ACTIVATES_GENE_EXPRESSION	104	81	0.336	0.34	0.276	0.171	0.97	0.955	0.692	0.676	1	0.925	1					0.493	1	0.431	1	0.483	1			0.361	0.57
PID_BETACATENIN_NUC_PATHWAY	80	62	0.518	0.602	0.425	0.67	0.972	0.968	0.945	0.603	1	0.376	1					0.473	1	0.352	1					0.626	0.49
REACTOME_AQUAPORIN_MEDIATED_TRANSPORT	51	34	0.405	0.0701	0.0871	0.139	0.972	0.968	0.413	0.643	1	0.599	1					0.781	1	0.717	1					0.517
KEGG_THYROID_CANCER	29	25	0.708	0.465	0.461	0.452	0.973	0.961	0.839	0.587	1							0.544	1	0.252	1					0.374
KEGG_REGULATION_OF_AUTOPHAGY	35	18	0.895	0.95	0.93	0.948	0.974	0.979	0.991																	0.58	0.159
PID_ERBB1_INTERNALIZATION_PATHWAY	41	38	0.442	0.215	0.273	0.25	0.974	0.963	0.769	0.869	1	0.587	1					0.758	1	0.686	1					0.85
REACTOME_ENDOSOMAL_SORTING_COMPLEX_REQUIRED_FOR_TRANSPORT_ESCRT	27	21	0.297	0.125	0.275	0.127	0.974	0.986	0.274																	0.685
REACTOME_TRANS_GOLGI_NETWORK_VESICLE_BUDDING	60	44	0.737	0.444	0.456	0.39	0.975	0.971	0.695	0.582	1	0.537	1					0.744	1	0.371	1					0.386
REACTOME_PREFOLDIN_MEDIATED_TRANSFER_OF_SUBSTRATE_TO_CCT_TRIC	28	15	0.922	0.704	0.704	0.708	0.975	0.984	0.454
REACTOME_RNA_POL_III_TRANSCRIPTION_INITIATION_FROM_TYPE_3_PROMOTER	26	14	0.79	0.708	0.243	0.258	0.976	0.98	0.979																	0.158	0.13
KEGG_PARKINSONS_DISEASE	133	57	0.757	0.862	0.663	0.72	0.978	0.983	0.985	0.643	1	0.629	1					0.872	1	0.76	1					0.572
BIOCARTA_NTHI_PATHWAY	24	18	0.886	0.682	0.747	0.573	0.979	0.97	0.674									0.508	1							0.577
PID_ENDOTHELINPATHWAY	63	55	0.175	0.0628	0.106	0.161	0.979	0.941	0.392	0.958	1	0.682	1					0.977	1	0.757	1					0.296
REACTOME_PLC_BETA_MEDIATED_EVENTS	43	36	0.0791	0.278	0.177	0.241	0.979	0.951	0.911	0.935	1	0.668	1					0.954	1	0.7	1					0.517
BIOCARTA_MPR_PATHWAY	34	25	0.405	0.575	0.19	0.146	0.98	0.981	0.952	0.13	1	0.164	1					0.275	1	0.306	1					0.133
BIOCARTA_SHH_PATHWAY	16	12	0.717	0.829	0.527	0.78	0.98	0.966	0.856
KEGG_OXIDATIVE_PHOSPHORYLATION	135	63	0.869	0.964	0.789	0.582	0.981	0.99	0.974	0.241	1							0.574	1	0.41	1	0.223	1			0.405
KEGG_HUNTINGTONS_DISEASE	185	100	0.529	0.662	0.45	0.29	0.981	0.977	0.979	0.195	1	0.311	1					0.346	1	0.123	1	0.313	1			0.059
BIOCARTA_GRANULOCYTES_PATHWAY	14	11	0.932	0.983	0.361	0.722	0.981	0.988	0.999
BIOCARTA_AKAPCENTROSOME_PATHWAY	15	10	0.63	0.659	0.32	0.49	0.981	0.959	0.679
PID_DELTANP63PATHWAY	47	38	0.937	0.964	0.45	0.649	0.981	0.977	0.939									0.831	1	0.548	1
REACTOME_SIGNALING_BY_NOTCH3	12	7	0.985	0.941	0.987	0.986	0.981	0.982	0.919
BIOCARTA_SPPA_PATHWAY	22	18	0.739	0.773	0.771	0.811	0.982	0.946	0.968
BIOCARTA_GPCR_PATHWAY	37	25	0.713	0.491	0.359	0.309	0.982	0.969	0.829	0.784	1							0.823	1							0.34	0.222
PID_BETACATENIN_DEG_PATHWAY	18	12	0.958	0.986	0.851	0.943	0.982	0.986	0.987
REACTOME_MEMBRANE_TRAFFICKING	129	93	0.368	0.0768	0.204	0.11	0.982	0.988	0.133	0.329	1	0.131	1					0.474	1	0.191	1	0.309	1			0.337	0.639
REACTOME_TRAF3_DEPENDENT_IRF_ACTIVATION_PATHWAY	14	9	0.927	0.659	0.372	0.551	0.983	0.983	0.657																	0.385
BIOCARTA_NOS1_PATHWAY	24	17	0.687	0.533	0.158	0.355	0.984	0.96	0.715
BIOCARTA_CARDIACEGF_PATHWAY	18	12	0.868	0.627	0.507	0.841	0.984	0.957	0.739
REACTOME_CONVERSION_FROM_APC_C_CDC20_TO_APC_C_CDH1_IN_LATE_ANAPHASE	22	11	0.945	0.895	0.0827	0.424	0.984	0.989	0.976	0.0424	1							0.151	1							0.103
PID_HNF3BPATHWAY	45	31	0.83	0.699	0.538	0.52	0.985	0.989	0.941
KEGG_NON_HOMOLOGOUS_END_JOINING	14	9	0.896	0.868	0.829	0.671	0.986	0.982	0.701
REACTOME_INTEGRATION_OF_ENERGY_METABOLISM	120	87	0.154	0.137	0.24	0.228	0.986	0.971	0.767	0.976	1	0.943	1					0.928	1	0.916	1					0.147
REACTOME_REGULATION_OF_INSULIN_SECRETION_BY_GLUCAGON_LIKE_PEPTIDE1	43	31	0.543	0.552	0.581	0.675	0.987	0.977	0.902																	0.469
BIOCARTA_TEL_PATHWAY	18	17	0.838	0.645	0.00975	0.394	0.988	0.976	0.432																	0.607	0.165
REACTOME_RNA_POL_III_TRANSCRIPTION_INITIATION_FROM_TYPE_2_PROMOTER	23	14	0.895	0.911	0.964	0.849	0.988	0.992	0.999																	0.513
BIOCARTA_KERATINOCYTE_PATHWAY	46	33	0.715	0.367	0.434	0.638	0.989	0.969	0.478
PID_ATM_PATHWAY	34	31	0.914	0.53	0.338	0.707	0.989	0.984	0.921																	0.79
ST_WNT_BETA_CATENIN_PATHWAY	34	27	0.961	0.894	0.457	0.346	0.99	0.989	0.936	0.224	1							0.376	1							0.362	0.213
REACTOME_RNA_POL_III_TRANSCRIPTION_TERMINATION	19	11	0.897	0.934	0.976	0.958	0.99	0.992	0.999
REACTOME_GLUCAGON_SIGNALING_IN_METABOLIC_REGULATION	34	23	0.486	0.0955	0.0162	0.0462	0.991	0.986	0.602	0.405	1	0.408	1					0.507	1	0.475	1					0.31
KEGG_ENDOMETRIAL_CANCER	52	44	0.784	0.331	0.237	0.425	0.992	0.979	0.564	0.738	1	0.612	1					0.798	1	0.668	1					0.372
KEGG_VIBRIO_CHOLERAE_INFECTION	56	44	0.802	0.79	0.684	0.687	0.993	0.991	0.898	0.742	1							0.635	1	0.503	1					0.64
BIOCARTA_CARM1_PATHWAY	13	9	0.71	0.821	0.582	0.479	0.993	0.991	0.976																	0.358
REACTOME_AKT_PHOSPHORYLATES_TARGETS_IN_THE_CYTOSOL	12	10	0.913	0.75	0.889	0.869	0.993	0.994	0.647
REACTOME_PKA_MEDIATED_PHOSPHORYLATION_OF_CREB	18	13	0.379	0.28	0.0267	0.0747	0.993	0.986	0.858	0.499	1	0.245	1					0.58	1	0.295	1					0.499
REACTOME_RESPIRATORY_ELECTRON_TRANSPORT	79	33	0.98	0.989	0.999	0.998	0.993	0.997	0.995																	0.808
REACTOME_REGULATION_OF_WATER_BALANCE_BY_RENAL_AQUAPORINS	44	29	0.58	0.148	0.0805	0.119	0.993	0.989	0.608	0.598	1	0.568	1					0.728	1	0.672	1					0.425
REACTOME_IL_7_SIGNALING	11	9	0.832	0.918	0.144	0.224	0.996	0.996	0.994
REACTOME_RNA_POL_III_CHAIN_ELONGATION	17	9	0.943	0.954	0.964	0.899	0.996	0.997	0.999
REACTOME_SIGNALING_BY_EGFR_IN_CANCER	109	89	0.229	0.298	0.0615	0.135	0.997	0.991	0.918	0.965	1	0.931	1					0.988	1	0.967	1					0.94
REACTOME_GOLGI_ASSOCIATED_VESICLE_BIOGENESIS	53	40	0.895	0.547	0.486	0.489	0.997	0.996	0.767	0.803	1							0.886	1	0.622	1					0.61
REACTOME_G_ALPHA_Z_SIGNALLING_EVENTS	44	34	0.716	0.0294	0.0467	0.197	0.998	0.994	0.349	0.907	1	0.823	1					0.935	1	0.858	1					0.529
KEGG_COLORECTAL_CANCER	62	51	0.955	0.862	0.872	0.889	0.999	0.998	0.97	0.86	1							0.916	1							0.725
REACTOME_RESPIRATORY_ELECTRON_TRANSPORT_ATP_SYNTHESIS_BY_CHEMIOSMOTIC_COUPLING_AND_HEAT_PRODUCTION_BY_UNCOUPLING_PROTEINS_	98	41	0.996	0.994	0.998	0.999	0.999	1	0.996																	0.879
